# Supplementary material for: Direct and indirect salt effects on homotypic phase separation
Source: eLife. 2024 Nov 12;13:RP100282. doi: 10.7554/eLife.100282 (PMC11556789; doi:10.7554/eLife.100282)
Supplement: Figure 1—figure supplement 1—source data 1. [file elife-100282-fig1-figsupp1-data1.xlsx]

## Sheet: Supplementary Figure 1
A
[NaCl] (mM)	Average RMSF (Å)	stdev
50	10.934	0.733
150	9.695	0.421
300	9.911	1.254
500	8.496	0.416
1000	8.014	0.55
