# Supplementary material for: Direct and indirect salt effects on homotypic phase separation
Source: eLife. 2024 Nov 12;13:RP100282. doi: 10.7554/eLife.100282 (PMC11556789; doi:10.7554/eLife.100282)
Supplement: Figure 2—source data 1. [file elife-100282-fig2-data1.xlsx]

## Sheet: Figure 2
A								B
	Dmax (Å)								Radius of gyration (Å)
time (ns)	50 mM	150 mM	300 mM	500 mM	1000 mM			[NaCl] (mM)	MD	stdev	Exp
0	151.632	150.601	152.429	152.452	151.386			50	25.1464	0.97093	26.448
0.2	148.153	145.76	149.089	151.643	149.023			150	24.2585	0.835798	26.499
0.4	147.892	147.27	149.957	152.199	150.039			300	24.7113	1.17263	26.2
0.6	147.813	148.908	151.001	151.052	150.735			500	24.2884	1.05341	25.284
0.8	149.87	148.034	150.884	150.127	151.348			1000	24.1089	1.43113	24.5
1	146.547	148.19	151.417	153.118	150.921
1.2	148.599	149.201	153.65	151.211	150.99
1.4	146.748	146.698	152.945	148.528	152.568
1.6	149.595	146.742	152.675	150.588	152.349			C
1.8	147.731	147.935	149.975	152.886	152.282				contacts per residue
2	151.004	147.327	151.455	151.558	153.146			[NaCl] (mM)	Intra	stdev	Inter	stdev
2.2	152.155	148.21	152.117	151.156	151.727			50	5.72852	0.280853	8.47509	0.223356
2.4	148.943	145.748	152.363	149.459	151.545			150	5.6527	0.177864	8.92032	0.264145
2.6	149.783	145.685	153.341	148.347	151.875			300	5.93297	0.279374	8.83283	0.492206
2.8	147.769	144.343	151.931	150.261	152.044			500	5.95351	0.131506	9.16571	0.0705037
3	153.24	143.649	153.126	151.117	152.692			1000	5.99697	0.258749	9.36164	0.359492
3.2	152.699	144.258	152.039	148.44	152.327
3.4	152.771	144.205	152.595	147.391	151.051
3.6	153.782	143.694	154.413	148.523	149.264
3.8	153.764	143.741	154.037	149.851	149.583
4	154.053	145.575	152.006	149.491	147.273
4.2	157.162	144.129	150.498	150.04	148.645
4.4	153.784	145.563	150.267	149.431	147.401
4.6	151.907	146.423	150.112	148.39	148.451
4.8	152.58	146.647	151.226	147.684	148.487
5	152.784	145.919	152.766	149.495	147.932
5.2	154.165	148.86	150.709	147.978	147.877
5.4	154.69	148.821	152.953	147.153	146.593
5.6	151.717	148.491	150.774	147.096	148.197
5.8	150.775	148.654	152.247	151.191	148.78
6	151.124	149.031	149.967	151.229	149.269
6.2	153.772	150.607	148.586	151.151	148.84
6.4	153.713	150.815	147.459	150.547	152.787
6.6	151.146	149.441	149.809	149.255	151.164
6.8	150.717	152.8	148.681	147.723	148.761
7	151.309	151.512	147.2	149.709	151.597
7.2	150.238	149.162	149.451	149.389	150.112
7.4	151.849	148.392	150.461	146.801	151.026
7.6	150.142	149.055	150.143	145.202	153.071
7.8	148.595	148.404	151.086	144.616	152.899
8	150.229	148.715	150.225	143.795	152.467
8.2	148.509	149.459	151.971	144.319	153.426
8.4	147.093	146.427	153.818	145.029	154.286
8.6	147.895	146.71	154.727	143.653	152.705
8.8	148.244	147.945	155.227	144.759	155.114
9	149.604	146.49	153.551	147.325	154.02
9.2	146.061	147.195	153.41	149.562	156.291
9.4	145.377	145.797	153.202	147.985	158.475
9.6	146.428	143.719	152.93	146.947	158.265
9.8	147.997	143.035	150.758	144.75	160.063
10	148.077	142.143	150.999	145.343	159.079
10.2	149.442	142.179	148.991	148.345	161.092
10.4	149.778	142.606	149.8	146.569	161.369
10.6	147.59	143.529	147.67	151.446	160.853
10.8	146.62	144.226	148.342	150.966	158.128
11	148.274	143.911	148.379	152.162	158.322
11.2	146.751	145.512	148.086	150.854	156.004
11.4	151.415	145.508	146.374	150.368	154.754
11.6	149.087	144.262	144.928	149.711	152.79
11.8	146.931	146.141	144.836	152.219	153.329
12	149.317	147.405	145.87	149.674	155.242
12.2	147.53	143.523	145.479	148.04	155.292
12.4	149.02	144.835	144.452	151.144	153.398
12.6	148.867	143.035	144.071	151.914	154.492
12.8	147.318	145.676	144.194	149.682	152.553
13	146.666	144.721	147.274	149.378	155.246
13.2	147.01	144.711	147.155	151.244	154.128
13.4	146.796	143.05	147.588	151.106	152.177
13.6	147.572	142.358	147.884	149.83	153.149
13.8	148.58	144.796	146.535	147.559	151.91
14	148.03	142.918	145.692	147.038	152.743
14.2	148.946	141.512	146.414	149.253	152.575
14.4	148.38	142.423	145.903	147.501	153.628
14.6	149.557	141.061	147.627	146.028	151.525
14.8	149.929	143.467	147.847	146.791	150.137
15	148.38	141.219	144.223	146.943	150.514
15.2	149.765	142.248	146.198	146.093	151.281
15.4	151.226	140.97	145.029	146.207	150.403
15.6	150.492	141.023	144.686	146.37	151.389
15.8	150.035	137.505	145.173	147.686	150.135
16	154.584	139.762	145.568	145.671	151.448
16.2	149.579	139.032	144.782	145.14	149.839
16.4	150.545	137.829	141.983	144.971	147.851
16.6	149.552	136.277	141.403	146.915	149.814
16.8	148.317	137.655	143.29	146.326	145.949
17	146.297	138.107	143.697	144.366	143.939
17.2	146.97	137.89	142.537	145.478	143.933
17.4	148.07	139.248	142.665	146.876	146.013
17.6	150.126	138.471	142.96	146.912	146.883
17.8	149.451	139.353	144.747	147.155	148.149
18	147.983	137.013	145.129	146.167	148.345
18.2	146.723	137.638	144.001	144.368	147.263
18.4	149.11	135.615	144.743	146.134	146.691
18.6	148.771	136.316	144.342	144.81	146.785
18.8	148.768	135.61	145.557	143.84	145.941
19	149.674	136.583	143.92	143.799	145.459
19.2	147.795	136.865	143.995	141.355	147.839
19.4	147.877	136.903	142.961	141.373	148.289
19.6	148.347	136.454	142.756	144.869	147.935
19.8	149.258	137.366	144.625	145.37	148
20	148.307	137.258	141.796	143.435	146.387
20.2	146.014	139.486	143.335	142.635	146.37
20.4	145.653	139.506	142.764	142.542	146.981
20.6	147.489	138.693	142.556	143.433	145.747
20.8	144.864	138.94	145.079	144.019	144.985
21	144.44	139.521	143.678	144.596	145.915
21.2	144.619	139.201	143.408	145.219	146.966
21.4	144.869	137.316	142.558	142.435	143.923
21.6	144.882	137.317	144.135	144.668	145.054
21.8	143.666	139.415	143.533	146.388	141.878
22	142.143	141.038	147.056	147.136	142.169
22.2	144.984	143.097	149.388	149.635	143.796
22.4	146.137	141.609	149.116	149.727	145.525
22.6	144.787	143.315	149.511	149.187	144.621
22.8	145.266	142.672	148.368	149.015	145.139
23	144.465	143.596	147.573	147.31	143.657
23.2	144.685	144.918	147.73	146.744	142.099
23.4	145.227	146.204	146.399	145.34	142.513
23.6	146.668	144.825	148.097	147.492	142.957
23.8	146.155	145.823	144.708	146.206	143.477
24	147.134	144.819	146.573	146.775	143.485
24.2	146.999	143.422	145.947	147.778	142.738
24.4	146.012	141.444	143.943	145.86	141.727
24.6	147.607	145.349	142.469	144.837	141.845
24.8	147.086	142.584	142.306	144.996	140.323
25	145.773	142.394	142.527	143.359	141.314
25.2	147.445	142.566	142.791	141.363	141.858
25.4	145.46	144.1	141.499	143.226	142.458
25.6	144.654	144.719	143.229	143.511	140.749
25.8	145.971	143.69	143.852	142.163	140.577
26	147.358	144.136	142.962	140.726	140.23
26.2	146.61	141.108	143.199	142.528	138.34
26.4	147.753	142.514	144.914	141.676	142.196
26.6	144.718	141.529	145.6	140.117	140.071
26.8	145.633	139.598	147.034	140.901	140.41
27	144.262	140.584	147.17	141.512	140.504
27.2	145.024	142.733	142.739	142.407	141.344
27.4	145.857	143.926	144.495	144.403	140.345
27.6	148.367	145.204	143.903	146.192	140.531
27.8	148.844	144.52	143.745	143.344	140.958
28	146.308	144.051	142.999	143.484	139.555
28.2	147.1	142.835	142.792	143.201	139.789
28.4	149.8	142.392	143.437	144.504	139.664
28.6	149.032	144.314	142.574	145.819	138.233
28.8	149.121	144.94	143.187	146.787	139.067
29	148.695	145.202	142.15	146.303	138.786
29.2	148.724	143.936	141.792	144.037	137.23
29.4	149.086	145.834	142.553	145.263	139.445
29.6	148.048	145.804	142.4	143.616	139.944
29.8	147.927	145.41	142.056	143.073	136.303
30	148.181	145.476	142.29	143.716	134.516
30.2	148.265	145.655	142.897	143.489	134.926
30.4	145.723	147.445	142.07	143.764	134.923
30.6	147.342	145.972	143.014	146.187	134.881
30.8	148.645	146.462	141.371	145.446	135.89
31	148.471	144.311	140.505	145.015	135.123
31.2	149.029	143.526	139.298	146.32	136.06
31.4	149.195	143.838	139.55	145.918	135.009
31.6	149.494	142.001	138.988	148.271	134.572
31.8	149.16	142.292	141.038	147.851	134.69
32	149.831	142.959	140.401	146.363	133.672
32.2	149.778	142.901	140.433	145.418	134.171
32.4	150.516	141.444	138.484	142.691	135.097
32.6	150.43	139.695	136.992	143.454	135.733
32.8	149.419	142.35	138.811	144.213	137.126
33	151.884	141.206	138.673	144.331	133.086
33.2	154.754	139.269	138.143	143.383	133.9
33.4	156.051	140.202	142.314	144.679	132.653
33.6	156.075	141.99	142.14	144.684	135.409
33.8	155.801	141.214	142.371	144.612	136.281
34	155.822	143.914	142.899	143.594	135.6
34.2	154.375	142.925	142.793	143.038	134.594
34.4	154.904	141.789	142.381	143.455	134.777
34.6	155.908	142.793	142.347	144.539	134.057
34.8	157.899	141.341	142.538	144.078	135.943
35	155.227	141.903	139.384	141.349	136.995
35.2	156.763	141.915	140.203	144.434	135.061
35.4	153.741	141.346	139.973	144.672	134.013
35.6	150.819	140.856	141.551	144.755	134.612
35.8	154.335	140.48	142.233	145.38	134.823
36	155.024	143.614	140.994	147.06	134.86
36.2	155.016	144.618	141.283	148.665	134.793
36.4	157.894	142.785	139.854	150.212	135.895
36.6	158.914	142.255	142.131	148.497	135.146
36.8	155.241	142.263	139.197	147.693	135.444
37	157.644	142.156	139.225	146.532	133.708
37.2	156.114	139.849	138.773	144.432	134.322
37.4	156.908	139.862	137.876	146.112	133.207
37.6	157.611	139.361	136.411	144.468	133.478
37.8	158.839	140.243	136.706	145.004	133.744
38	158.813	140.572	137.209	145.351	133.434
38.2	156.918	139.062	136.24	147.054	132.63
38.4	157.385	137.576	137.617	149.388	131.983
38.6	157.958	139.954	136.473	148.138	133.642
38.8	155.621	139.636	137.821	147.968	132.686
39	156.214	139.655	135.64	146.821	132.169
39.2	157.757	142.113	137.778	146.745	132.371
39.4	155.575	143.305	138.496	146.232	132.363
39.6	156.574	140.491	140.702	146.913	133.199
39.8	155.337	141.838	141.409	146.838	134.018
40	155.465	140.753	138.815	144.666	133.335
40.2	156.288	140.269	139.082	144.365	133.504
40.4	154.051	140.478	139.149	144.945	133.519
40.6	155.246	141.844	140.439	145.957	131.936
40.8	155.01	140.995	141.967	147.052	133.157
41	154.061	141.008	140.744	146.311	133.007
41.2	155.742	142.362	142.763	146.56	133.207
41.4	155.316	143.422	141.484	144.584	133.002
41.6	154.922	143.408	142.579	144.708	135.501
41.8	153.967	144.028	141.873	145.462	133.552
42	156.041	145.488	141.424	145.221	132.414
42.2	155.06	146.026	140.495	143.646	131.451
42.4	154.072	143.231	140.456	144.554	133.089
42.6	156.033	141.644	141.143	142.728	133.185
42.8	156.278	142.143	140.102	144.488	132.75
43	156.13	142.421	140.779	147.574	131.447
43.2	157.147	142.394	140.089	147.888	132.673
43.4	154.284	144.266	138.882	147.307	130.354
43.6	153.379	146.691	140.667	146.142	132.642
43.8	158.147	145.144	140.511	147.794	132.725
44	156.402	144.961	140.527	147.474	132.886
44.2	156.638	144.072	140.388	150.085	131.41
44.4	157.433	144.602	139.447	146.853	131.595
44.6	156.194	144.497	139.048	149.823	131.767
44.8	156.613	143.763	139.873	149.061	133.606
45	159.236	145.35	140.957	150.889	136.439
45.2	158.129	143.773	137.844	149.291	134.499
45.4	158.413	145.694	137.604	149.451	135.323
45.6	156.72	145.77	136.823	148.697	134.78
45.8	156.916	147.08	137.271	147.629	134.06
46	159.163	146.98	139.386	148.9	134.613
46.2	157.716	146.314	138.109	149.478	134.433
46.4	159.4	146.926	138.432	147.268	134.878
46.6	158.644	145.476	138.666	146.93	134.902
46.8	158.283	144.609	136.777	149.807	133.134
47	156.793	145.951	135.859	148.213	134.404
47.2	157.059	143.579	135.901	147.035	134.896
47.4	158.723	142.949	137.452	149.496	134.513
47.6	158.142	142.16	140.132	146.275	135.609
47.8	157.207	144.624	139.157	146.999	135.502
48	156.894	141.185	140.293	147.622	136.158
48.2	158.764	142.823	141.565	146.511	135.984
48.4	159.908	144.469	141.258	149.267	133.571
48.6	157.189	146.21	140.924	151.432	133.482
48.8	156.595	143.44	140.134	151.363	132.476
49	157.416	144.304	140.751	150.508	133.353
49.2	156.224	143.625	140.774	148.735	133.339
49.4	154.919	143.818	142.212	151.06	135.413
49.6	155.307	146.567	141.438	150.278	134.79
49.8	155.323	143.657	142.822	149.813	133.927
50	155.336	145.103	142	148.834	132.835
50.2	155.477	145.299	141.366	147.167	133.598
50.4	154.424	146.276	140.799	148.559	133.616
50.6	154.949	144.269	140.012	149.246	131.577
50.8	155.275	144.721	140.324	149.654	132.426
51	156.45	144.779	140.503	150.338	132.067
51.2	158.172	145.001	140.906	150.63	132.907
51.4	158.638	145.376	140.455	151.424	132.959
51.6	158.595	145.251	140.39	149.307	132.685
51.8	158.635	144.712	141.06	148.829	134.666
52	158.385	145.24	138.853	150.132	134.593
52.2	157.973	146.459	138.541	149.829	134.466
52.4	156.595	146.342	139.102	147.549	134.644
52.6	154.874	147.752	139.727	147.649	133.545
52.8	156.078	146.723	138.739	145.7	133.148
53	155.696	145.979	137.048	144.59	133.2
53.2	155.913	146.305	138.233	143.724	133.138
53.4	154.095	144.321	138.513	142.457	133.162
53.6	157.13	146.936	138.04	143.499	133.029
53.8	156.192	147.131	137.767	144.192	131.437
54	153.62	146.178	138.191	146.062	133.389
54.2	157.058	145.854	138.715	147.218	132.197
54.4	156.584	146.736	139.288	145.728	133.225
54.6	157.971	150.914	138.459	145.388	132.081
54.8	157.792	146.864	138.716	146.664	132.435
55	157.818	148.144	139.419	147.715	131.844
55.2	156.142	151.109	137.138	146.202	132.182
55.4	158.97	148.941	137.551	146.26	131.94
55.6	158.216	149.581	137.039	145.655	130.079
55.8	156.959	150.145	137.87	143.933	130.609
56	153.68	152.325	138.88	144.42	131.228
56.2	154.801	151.263	137.991	143.323	131.539
56.4	154.691	148.915	136.202	141.765	131.585
56.6	156.669	149.116	138.896	141.85	131.162
56.8	155.64	148.976	139.285	141.273	131.389
57	159.554	148.498	140.384	139.951	131.579
57.2	158.441	149.523	141.012	141.081	132.123
57.4	158.901	149.019	140.453	140.535	131.739
57.6	159.511	150.707	140.787	138.684	133.198
57.8	160.395	149.636	139.738	136.664	131.219
58	160.678	148.37	140.727	138.381	132.544
58.2	160.834	154.714	140.281	139.772	133.517
58.4	159.527	155.934	140.085	138.736	133.595
58.6	160.015	153.868	139.601	138.658	132.901
58.8	160.422	154.107	142.086	138.914	133.814
59	160.643	152.592	142.861	141.458	134.833
59.2	161.219	152.363	142.986	140.573	136.12
59.4	161.277	153.61	141.848	141.129	135.167
59.6	161.56	154.042	142.348	141.418	137.646
59.8	160.998	154.52	142.734	142.806	138.642
60	160.034	156.147	142.623	142.129	139.349
60.2	161.612	155.576	143.401	139.383	138.154
60.4	162.228	155.854	142.694	140.328	138.266
60.6	163.14	155.631	143.722	140.598	136.312
60.8	160.598	155.379	140.989	140.536	136.609
61	157.899	154.78	142.038	141.272	135.176
61.2	157.922	158.393	141.061	140.963	136.721
61.4	157.849	158.488	139.124	141.854	138.021
61.6	157.954	158.907	140.267	142.139	136.567
61.8	159.035	156.106	140.137	140.214	135.362
62	157.436	156.506	141.112	140.843	136.047
62.2	159.23	155.853	140.58	140.225	134.635
62.4	156.682	158.091	140.669	141.087	134.631
62.6	158.674	152.428	140.737	140.1	134.481
62.8	157.524	151.174	140.919	140.616	132.464
63	156.554	153.072	138.534	139.595	132.64
63.2	157.33	153.967	139.628	141.227	132.832
63.4	159.668	153.694	139.505	140.488	133.008
63.6	158.831	152.723	140.265	140.465	133.779
63.8	159.171	152.463	140.156	140.51	132.759
64	163.25	151.631	138.334	140.705	134.543
64.2	164.67	151.602	139.723	138.404	135.754
64.4	162.63	152.937	141.853	136.006	135.602
64.6	162.932	154.066	142.544	136.991	133.021
64.8	163.895	153.309	142.638	136.369	133.761
65	164.596	153.04	140.851	137.127	133.426
65.2	163.778	155.053	140.418	136.819	132.353
65.4	162.968	156.224	141.237	137.77	132.331
65.6	161.822	153.537	140.656	139.112	132.124
65.8	163.404	152.248	141.625	136.306	130.678
66	162.332	150.881	142.864	135.276	129.805
66.2	162.395	151.335	142.581	137.514	129.545
66.4	162.523	152.038	142.84	137.924	129.863
66.6	163.275	151.43	141.23	138.015	131.095
66.8	163.051	150.156	142.244	138.109	129.3
67	158.87	151.41	142.618	137.719	131.26
67.2	159.382	151.75	140.758	139.362	130.851
67.4	158.917	151.483	141.497	137.812	129.235
67.6	157.072	150.399	141.185	138.589	130.673
67.8	156.86	151.069	143.108	139.063	131.579
68	156.28	151.307	142.415	140.273	130.746
68.2	156.663	153.009	142.086	140.118	130.508
68.4	157.652	152.37	142.18	141.412	129.876
68.6	157.42	152.253	143.293	139.512	130.6
68.8	159.042	154.321	143.43	140.649	131.261
69	157.87	154.97	145.709	139.805	131.465
69.2	158.903	156.308	144.515	138.566	130.369
69.4	157.971	155.505	145.493	139.927	131.711
69.6	158.796	152.608	144.059	139.66	132.212
69.8	158.647	152.656	143.384	137.046	132.655
70	155.829	151.667	143.632	138.953	133.35
70.2	154.788	149.939	143.407	140.072	130.198
70.4	153.709	152.48	144.729	139.145	130.875
70.6	154.025	151.874	144.648	136.545	133.103
70.8	154.809	153.35	143.53	135.386	132.184
71	154.208	155.018	141.798	137.051	131.081
71.2	153.151	156.008	143.939	137.315	130.055
71.4	152.835	153.769	143.479	136.425	132.488
71.6	155.017	154.902	143.338	137.09	133.321
71.8	156.377	156.006	144.339	136.034	130.046
72	157.639	157.781	146.357	136.663	130.672
72.2	156.78	158.554	143.5	135.543	130.082
72.4	153.31	157.849	145.388	136.87	129.814
72.6	156.468	157.575	143.85	135.199	130.786
72.8	156.513	159.67	144.961	132.938	130.217
73	159.184	159.606	144.04	132.868	129.768
73.2	159.043	158.393	143.281	134.017	130.266
73.4	155.663	159.098	145.301	135.152	129.588
73.6	155.279	159.261	143.479	136.171	129.761
73.8	152.242	159.627	142.391	135.954	130.108
74	152.31	158.799	140.989	134.848	131.629
74.2	150.29	156.393	143.301	135.943	130.116
74.4	151.064	155.889	141.924	137.782	129.951
74.6	152.889	159.286	142.598	135.167	130.274
74.8	150.439	158.57	144.699	134.663	131.353
75	150.673	156.582	143.897	134.329	133.302
75.2	150.806	157.517	146.546	134.497	133.596
75.4	149.87	158.417	145.971	134.796	132.122
75.6	149.587	157.55	144.894	134.09	130.114
75.8	149.815	155.818	143.045	134.202	129.813
76	149.418	154.864	143.674	132.64	129.946
76.2	148.634	155.049	145.43	133.072	130.848
76.4	146.498	156.528	145.206	132.379	131.33
76.6	146.572	155.379	146.414	133.722	131.262
76.8	145.792	157.464	146.24	134.083	130.971
77	147.01	155.124	144.075	136.372	131.201
77.2	148.078	154.839	144.824	136.392	131.248
77.4	150.348	154.983	145.883	137.289	129.894
77.6	150.289	153.899	146.164	136.523	129.163
77.8	150.901	154.651	146.881	136.96	131.319
78	151.466	155.482	145.746	136.014	131.891
78.2	152.511	154.422	143.126	135.715	131.09
78.4	151.351	154.094	142.006	136.004	133.139
78.6	150.533	153.913	142.37	137.45	132.139
78.8	151.793	152.543	143.02	137.097	130.196
79	151.559	153.279	145.506	136.144	129.672
79.2	151.573	153.508	144.891	134.472	132.203
79.4	151.742	153.472	146.816	137.271	131.215
79.6	151.964	155.397	145.249	136.683	133.027
79.8	151.888	153.811	143.321	137.074	131.278
80	152.611	154.61	143.927	133.833	130.79
80.2	151.611	153.249	143.363	134.993	132.333
80.4	150.085	153.21	143.893	135.65	133.398
80.6	149.715	153.901	144.273	136.725	133.96
80.8	150.911	155.255	144.272	137.718	132.121
81	151.084	155.132	142.477	140.861	132.62
81.2	149.785	155.225	142.736	141.369	132.924
81.4	150.839	157.596	142.166	141.53	131.907
81.6	150.208	157.575	144.274	142.938	133.041
81.8	150.597	155.685	143.383	142.296	132.712
82	151.251	154.906	144.847	143.577	131.573
82.2	149.695	154.612	145.287	144.816	131.69
82.4	152.056	156.735	143.732	144.619	132.7
82.6	152.855	156.993	145.694	143.95	130.765
82.8	153.541	156.995	144.417	144.561	131.843
83	153.815	158.441	145.926	146.094	130.062
83.2	155.585	157.95	145.208	146.184	128.867
83.4	154.492	158.042	145.209	143.939	130.689
83.6	154.758	159.162	146.167	144.422	130.36
83.8	152.746	160.626	147.778	144.999	128.413
84	154.261	158.825	146.591	143.302	128.658
84.2	153.726	158.366	146.218	142.781	130.339
84.4	154.155	157.013	142.604	142.555	130.505
84.6	153.323	159.082	142.162	145.052	129.241
84.8	152.265	156.566	142.307	147.52	130.204
85	151.785	157.53	141.813	146.799	131.255
85.2	151.119	158.451	140.646	145.81	130.326
85.4	151.632	159.355	141.46	146.662	129.567
85.6	151.39	160.169	142.492	144.149	133.216
85.8	150.161	160.349	141.014	145.192	132.307
86	151.041	157.231	140.567	145.9	131.438
86.2	151.681	158.238	140.251	146.986	131.513
86.4	154.655	157.105	140.686	146.853	130.042
86.6	153.995	156.08	141.116	147.603	131.396
86.8	151.585	156.239	140.936	148.625	130.868
87	153.322	156.815	138.965	149.163	130.914
87.2	151.692	156.905	138.926	151.053	131.37
87.4	151.444	156.886	138.63	147.978	130.37
87.6	150.789	156.036	138.861	149.111	128.915
87.8	152.313	156.521	138.395	147.156	131.001
88	150.394	156.527	139.127	148.211	130.517
88.2	149.887	155.091	138.297	147.456	129.277
88.4	148.912	155.55	139.574	144.463	130.274
88.6	149.306	156.847	138.206	147.22	128.49
88.8	150.014	155.408	139.684	145.023	130.027
89	147.843	153.833	141.031	145.319	128.842
89.2	147.948	154.493	140.894	144.036	130.343
89.4	147.611	155.517	140.683	142.086	130.07
89.6	147.249	157.431	139.498	142.775	130.57
89.8	149.739	155.16	140.793	144.136	129.941
90	149.519	155.234	141.615	144.26	130.575
90.2	147.089	156.85	137.556	144.245	130.79
90.4	146.252	155.673	141.435	143.242	131.613
90.6	145.386	156.283	142.506	143.37	132.627
90.8	145.299	152.751	143.049	142.734	132.531
91	146.644	154.424	143.927	140.212	130.373
91.2	146.346	154.407	140.285	141.667	131.42
91.4	147.36	154.386	140.327	140.235	130.53
91.6	147.549	153.438	141.907	142.137	130.794
91.8	148.976	154.629	144.594	142.177	131.626
92	148.98	154.202	143.872	142.282	131.068
92.2	147.555	155.741	143.257	144.131	130.864
92.4	146.978	156	142.834	141.917	130.522
92.6	147.185	155.265	142.58	141.603	130.449
92.8	148.01	156.705	141.405	140.572	130.065
93	146.315	154.976	139.236	138.44	130.469
93.2	145.831	155.084	139.86	141.065	130.806
93.4	147.795	155.271	138.677	142.181	129.698
93.6	146.271	154.42	139.654	142.323	129.458
93.8	144.507	156.184	139.209	140.695	129.481
94	145.892	157.967	137.997	139.739	130.542
94.2	144.307	157.111	137.31	138.351	131.114
94.4	145.839	155.562	136.766	139.027	130.991
94.6	147.863	153.374	138.362	137.653	131.604
94.8	144.472	155.227	139.683	139.093	131.082
95	145.22	154.762	139.878	138.166	129.469
95.2	144.492	152.309	139.761	137.876	128.487
95.4	143.174	154.33	141.726	137.876	128.542
95.6	146.163	152.943	139.993	136.083	130.49
95.8	146.28	152.068	139.591	135.269	130.046
96	146.203	153.275	138.943	134.508	131.667
96.2	147.895	154.074	137.976	136.344	130.912
96.4	147.057	153.27	137.978	136.129	133.688
96.6	146.346	153.737	140.558	136.222	132.076
96.8	146.731	154.046	139.147	138.519	129.321
97	147.142	154.215	139.412	138.953	129.92
97.2	147.073	153.931	140.758	138.579	128.61
97.4	146.316	154.586	140.251	137.989	127.184
97.6	148.522	155.273	139.939	136.677	128.942
97.8	146.886	154.569	140.5	136.563	127.337
98	148.502	154.413	139.804	139.176	126.871
98.2	148.937	154.791	138.066	138.089	126.54
98.4	151.564	156.292	138.784	137.982	128.064
98.6	149.413	157.431	138.817	138.136	126.704
98.8	151.259	157.911	140.285	139.488	126.2
99	151.955	157.456	140.161	139.844	127.264
99.2	147.244	157.832	141.316	139.101	126.521
99.4	144.389	158.261	140.304	140.266	127.184
99.6	146.989	157.268	142.349	139.154	126.525
99.8	150.034	158.294	141.667	137.188	127.927
100	149.832	157.912	142.019	135.765	128.196
100.2	147.558	157.665	141.528	136.743	127.539
100.4	147.973	158.861	140.872	136.906	126.951
100.6	148.074	157.58	138.62	137.051	128.223
100.8	148.171	158.056	138.657	136.65	128.901
101	146.611	158.355	139.757	138.126	129.642
101.2	146.613	159.37	140.351	139.87	130.377
101.4	147.516	157.016	142.207	137.388	130.153
101.6	147.883	160.048	142.11	135.707	131.021
101.8	148.208	158.602	142.123	137.876	131.98
102	149.933	158.867	141.079	136.111	130.846
102.2	147.529	159.867	141.383	135.09	132.1
102.4	146.379	160.426	143.405	136.176	131.426
102.6	147.129	161.966	141.036	139.346	129.838
102.8	145.818	159.506	139.807	137.23	129.387
103	147.047	159.563	138.886	137.577	129.186
103.2	145.824	158.979	140.735	137.749	129.175
103.4	147.845	159.288	139.602	138.172	128.679
103.6	147.388	158.291	139.153	140.948	130.437
103.8	146.577	160.284	139.41	140.561	131.485
104	148.798	161.452	140.088	139.151	131.184
104.2	148.723	161.341	140.565	140.518	131.02
104.4	148.127	159.945	138.974	139.834	131.851
104.6	151.375	159.575	137.324	141.96	131.124
104.8	149.291	158.449	138.937	140.055	130.578
105	149.315	159.349	139.28	140.387	129.454
105.2	149.246	158.159	140.95	136.477	128.655
105.4	150.046	158.863	140.525	137.217	129.002
105.6	151.436	160.761	141.71	136.745	129.26
105.8	152.066	159.453	140.857	135.855	128.178
106	150.942	157.872	143.021	135.701	127.749
106.2	150.652	156.761	143.347	134.513	128.634
106.4	151.682	157.297	142.573	134.509	127.035
106.6	149.822	156.75	143.48	134.904	126.736
106.8	147.937	154.427	144.636	132.237	127.516
107	147.121	155.896	142.894	136.222	128.746
107.2	146.184	156.722	141.364	136.764	127.77
107.4	147.999	156.347	140.904	137.479	128.384
107.6	149.813	156.433	144.186	136.154	126.029
107.8	149.833	155.321	140.422	138.008	127.787
108	150.37	157.565	142.235	134.978	126.428
108.2	151.412	156.337	139.767	136.981	125.336
108.4	150.377	156.05	143.393	136.999	126.211
108.6	150.695	155.039	141.857	134.4	126.062
108.8	152.441	152.9	142.993	137.238	127.086
109	154.841	153.127	141.384	135.889	125.193
109.2	154.395	154.687	140.165	133.965	127.221
109.4	154.785	155.238	141.07	134.124	130.362
109.6	155.77	155.823	141.935	131.694	130.73
109.8	153.009	155.77	145.259	130.575	130.721
110	155.145	155.499	143.45	135.419	132.208
110.2	152.433	155.199	142.79	134.449	130.121
110.4	151.62	155.38	140.932	136.865	128.667
110.6	153.132	154.676	141.887	136.278	128.082
110.8	154.506	156.367	142.981	136.033	128.774
111	153.908	158.075	142.639	137.39	127.93
111.2	154.655	158.438	142.986	136.675	128.826
111.4	153.945	159.93	142.387	136.018	127.934
111.6	154.878	160.221	144.941	135.944	127.206
111.8	153.761	158.11	144.918	136.021	127.367
112	154.018	157.951	144.756	135.608	127.082
112.2	155.882	159.549	143.229	135.213	127.243
112.4	156.516	157.64	144.796	134.185	127.419
112.6	159.435	159.302	146.979	133.913	126.611
112.8	161.008	159.637	146.961	134.365	128.504
113	158.16	161.122	145.625	134.528	128.109
113.2	156.874	158.841	144.473	135.717	128.018
113.4	159.427	159.31	145.084	136.852	127.352
113.6	158.689	159.746	145.601	137.467	125.701
113.8	154.565	159.143	143.825	136.511	126.615
114	154.87	159.843	142.042	135.621	127.296
114.2	155.075	160.475	143.388	136.995	128.437
114.4	155.347	161.808	146.249	137.22	126.764
114.6	156.822	162.488	144.498	137.353	126.465
114.8	155.586	164.418	145.008	138.327	127.419
115	155.797	164.481	144.699	138.713	127.652
115.2	157.928	165.16	145.8	134.465	128.157
115.4	159.041	167.055	145.539	135.791	127.37
115.6	157.095	167.6	144.934	138.406	128.129
115.8	157.406	167.432	143.603	136.672	125.532
116	155.756	166.993	142.087	139.101	125.788
116.2	155.376	166.056	142.473	139.43	123.837
116.4	155.71	167.377	143.944	139.845	125.793
116.6	155.606	166.693	142.956	138.195	125.509
116.8	156.146	163.45	146.177	137.229	125.955
117	154.79	161.313	144.846	137.555	124.572
117.2	155.436	160.889	142.445	136.579	125.91
117.4	158.487	161.507	142.601	137.234	124.741
117.6	158.569	163.043	142.777	138.901	125.207
117.8	157.572	160.832	142.908	138.605	126.274
118	159.88	164.194	141.267	138.353	128.017
118.2	161.317	164.393	142.07	136.795	127.394
118.4	162.446	163.665	140.98	136.692	127.52
118.6	160.595	163.663	140.784	137.801	126.495
118.8	162.225	163.76	141.584	138.744	124.501
119	161.587	165.231	140.758	138.348	125.281
119.2	158.842	163.047	140.793	137.762	125.245
119.4	160.033	162.908	140.808	138.065	124.751
119.6	161.04	162.611	140.797	137.461	124.327
119.8	160.879	162.954	139.871	139.013	125.174
120	162.366	162.453	138.592	136.773	125.295
120.2	161.088	165.094	139.052	137.833	124.204
120.4	160.631	162.876	138.391	136.617	127.066
120.6	162.148	163.781	138.029	137.828	125.518
120.8	161.82	166.134	139.529	137.149	128.047
121	161.803	164.536	139.692	136.173	126.668
121.2	163.215	164.87	139.461	135.771	127.794
121.4	162.597	165.256	139.183	134.778	126.207
121.6	157.291	162.392	139.288	133.769	126.115
121.8	157.259	162.38	138.635	132.736	125.965
122	160.075	162.087	137.936	135.982	125.042
122.2	156.635	165.078	136.678	133.55	126.078
122.4	155.378	165.52	137.065	132.448	124.793
122.6	153.929	162.069	138.238	133.261	125.561
122.8	154.173	162.557	138.727	134.452	126.104
123	152.427	162.608	138.305	133.788	126.77
123.2	151.567	162.413	139.901	132.543	126.397
123.4	151.957	161.238	138.808	133.256	126.968
123.6	152.437	161.536	139.395	131.561	127.379
123.8	151.111	163.464	139.011	132.453	126.006
124	149.484	161.789	138.646	132.9	127.42
124.2	150.137	162.567	141.615	134.291	128.692
124.4	151.203	161.541	142.01	132.948	129.147
124.6	151.446	160.422	144.55	137.144	128.7
124.8	152.099	159.879	143.965	134.216	126.864
125	152.789	159.489	143.282	134.642	129.049
125.2	152.343	161.347	143.033	134.582	129.271
125.4	151.607	160.772	143.961	135.271	127.364
125.6	151.424	160.537	143.906	132.378	125.898
125.8	153.929	161.75	142.284	132.297	127.628
126	152.226	160.666	141.571	132.985	126.048
126.2	152.507	160.129	141.648	131.608	126.36
126.4	154.42	159.773	141.629	133.588	127.148
126.6	153.433	162.265	141.944	130.372	127.083
126.8	153.658	160.552	143.797	131.529	127.371
127	155.159	161.84	140.61	130.227	128.403
127.2	153.307	160.949	142.7	129.926	126.206
127.4	153.002	159.81	144.484	132.747	127.071
127.6	151.869	161.513	144.196	131.295	127.579
127.8	152.681	159.329	143.631	129.221	128.296
128	153.194	159.207	143.928	130.695	126.919
128.2	154.859	157.961	143.7	130.016	128.421
128.4	154.876	158.545	141.801	131.746	127.942
128.6	153.304	158.887	144.045	132.083	129.668
128.8	151.872	159.344	143.387	131.441	127.866
129	152.834	159.046	142.949	129.593	126.805
129.2	154.454	159.71	140.03	129.797	125.901
129.4	152.29	157.201	141.053	129.641	126.882
129.6	152.661	157.485	141.149	134.01	126.688
129.8	152.904	157.692	140.141	133.725	126.289
130	153.683	157.048	140.453	133.781	127.733
130.2	151.716	157.198	137.615	133.027	127.309
130.4	151.798	158.67	137.719	132.547	128.077
130.6	151.406	157.416	139.646	134.573	127.17
130.8	152.879	159.216	139.858	133.362	125.598
131	150.129	162.084	138.979	132.908	124.846
131.2	149.96	161.506	140.104	132.801	126.118
131.4	152.138	161.123	138.343	131.577	124.292
131.6	150.818	159.768	139.359	135.193	125.032
131.8	148.497	161.549	137.349	133.81	125.194
132	150.828	161.552	136.971	132.166	125.515
132.2	150.313	161.97	134.958	133.484	127.053
132.4	150.847	160.134	135.896	132.31	126.672
132.6	150.924	159.156	136.008	133.527	126.904
132.8	148.175	158.135	135.893	132.579	125.763
133	148.239	158.381	137.292	133.439	126.007
133.2	146.282	159.886	137.226	133.559	127.081
133.4	146.774	159.635	138.017	131.302	123.626
133.6	146.148	159.869	137.178	133.363	125.685
133.8	146.717	158.867	136.992	133.849	127.102
134	146.919	157.475	135.307	131.818	128.142
134.2	145.721	156.765	136.644	134.154	127.402
134.4	145.897	159.295	134.269	134.168	126.219
134.6	147.883	158.864	134.515	133.422	125.63
134.8	146.156	161.63	134.537	135.051	126.771
135	148.018	159.858	133.875	135.398	126.574
135.2	150.432	158.949	137.438	136.341	126.687
135.4	149.382	159.753	135.719	135.494	126.576
135.6	150.602	159.514	132.823	136.031	124.527
135.8	152.433	159.843	135.1	137.067	126.726
136	152.679	156.826	137.093	135.075	126.123
136.2	153.313	155.707	134.294	135.305	126.947
136.4	151.424	154.862	134.707	136.448	127.438
136.6	154.308	157.368	136.526	136.241	127.16
136.8	156.162	156.088	135.258	135.183	125.341
137	156.55	157.768	135.733	138.051	126.656
137.2	157.211	155.26	136.854	138.33	125.636
137.4	152.921	158.142	138.861	138.075	128.653
137.6	152.245	159.973	138.9	139.376	127.635
137.8	153.244	155.274	140.767	139.004	126.932
138	151.995	156.591	139.969	138.333	125.773
138.2	149.792	156.785	138.827	138.848	125.454
138.4	151.545	158.581	138.443	136.78	124.956
138.6	151.709	158.534	136.781	139.022	123.528
138.8	151.009	157.624	136.682	136.871	124.937
139	150.916	158.56	136.13	137.533	125.359
139.2	153.942	158.466	135.191	135.558	127.033
139.4	153.403	157.219	136.206	133.985	125.801
139.6	155.357	157.92	135.67	133.718	126.354
139.8	153.684	155.6	138.882	132.307	125.662
140	154.36	155.756	137.451	132.707	126.895
140.2	153.105	153.476	138.795	131.302	125.939
140.4	155.527	154.885	138.706	131.99	123.727
140.6	153.28	154.478	136.683	133.463	122.579
140.8	153.766	153.814	135.133	132.668	122.144
141	154.323	154.419	135.694	133.254	123.415
141.2	153.374	153.771	133.492	132.654	121.911
141.4	151.271	152.418	134.408	132.132	122.395
141.6	151.444	152.977	134.912	130.911	122.674
141.8	150.791	151.781	133.119	129.918	122.385
142	152.523	151.44	134.766	130.442	121.91
142.2	152.477	148.831	134.806	131.114	122.815
142.4	150.296	149.439	132.547	133.328	123.614
142.6	149.292	150.988	135.366	132.254	125.883
142.8	151.488	151.495	136.068	133.762	127.436
143	151.115	150.738	135.516	134.917	126.742
143.2	151.919	151.29	135.814	133.698	125.574
143.4	150.962	149.982	135.99	136.995	125.845
143.6	153.99	150.861	137.841	137.625	126.254
143.8	154.812	150.664	135.845	138.566	124.009
144	157.667	149.897	136.653	138.096	124.494
144.2	155.539	151.837	137.195	141.454	124.495
144.4	154.954	151.688	135.951	139.999	124.539
144.6	154.131	150.546	136.794	140.501	127.102
144.8	153.86	150.701	136.335	138.864	123.915
145	153.874	150.126	136.657	141.505	125.171
145.2	154.396	149.068	137.576	141.666	126.341
145.4	154.153	148.858	136.175	141.665	125.071
145.6	153.2	146.751	136.455	140.968	125.191
145.8	151.831	146.415	137.594	139.042	124.61
146	152.512	146.86	138.842	139.282	124.88
146.2	152.456	146.212	138.037	139.956	125.599
146.4	152.91	147.009	136.951	138.038	125.654
146.6	152.809	148.034	137.705	138.231	124.321
146.8	152.06	147.351	138.231	138.309	125.74
147	152.07	147.98	136.679	138.768	126.322
147.2	151.476	147.841	136.929	135.916	126.658
147.4	152.896	146.787	136.534	133.847	125.309
147.6	151.582	147.896	136.773	136.256	126.912
147.8	152.041	147.565	137.953	136.569	127.126
148	151.442	148.348	139.936	134.771	127.151
148.2	150.203	148.215	138.754	133.4	126.011
148.4	151.199	148.886	139.699	132.994	125.533
148.6	151.119	149.86	139.603	131.997	125.401
148.8	153.523	149.524	138.626	130.634	126.775
149	154.353	151.544	138.889	128.367	125.76
149.2	155.42	150.891	137.753	129.665	125.46
149.4	155.963	151.454	137.733	129.481	125.233
149.6	154.321	150.61	138.551	130.488	124.917
149.8	156.691	152.257	140.303	129.927	124.594
150	156.227	153.065	138.8	132.088	124.497
150.2	156.175	150.213	137.957	133.077	123.765
150.4	155.721	152.043	139.443	131.438	123.62
150.6	154.654	149.605	137.948	132.182	122.885
150.8	154.933	150.684	137.573	131.013	122.643
151	153.052	148.548	138.765	131.759	122.913
151.2	151.282	150.135	139.156	129.754	123.2
151.4	151.344	148.813	138.919	130.368	123.526
151.6	151.539	147.799	138.771	132.475	124.013
151.8	152.783	147.961	137.232	132.357	124.401
152	150.821	147.314	137.985	131.919	126.173
152.2	150.525	148.323	137.509	131.351	124.668
152.4	152.947	148.773	138.553	130.873	124.851
152.6	153.577	147.573	137.932	132.005	124.788
152.8	153.782	146.584	137.112	133.297	122.717
153	152.461	146.66	138.152	134.307	123.493
153.2	151.53	145.782	138.163	132.834	124.824
153.4	152.199	145.129	135.895	131.635	126.31
153.6	151.885	142.555	137.979	131.396	126.16
153.8	152.141	142.751	138.472	132.062	125.569
154	150.96	145.012	138.489	130.567	126.372
154.2	152.094	144.125	139.818	129.565	126.973
154.4	151.22	142.296	139.599	130.634	125.602
154.6	151.415	141.536	139.244	130.366	122.972
154.8	148.6	144.649	138.933	133.71	125.649
155	149.316	143.265	141.233	134.051	124.102
155.2	150.663	142.873	141.677	133.821	123.902
155.4	149.759	142.634	142.229	134.186	124.782
155.6	152.869	142.418	141.225	136.538	123.698
155.8	150.963	140.283	139.972	135.788	122.406
156	150.359	140.243	140.131	136.377	123.467
156.2	152.025	140.332	139.983	136.148	124.734
156.4	153.369	141.189	140.853	136.987	124.136
156.6	154.589	140.661	142.159	137.218	124.614
156.8	155.209	140.333	142.509	136.784	127.156
157	154.482	140.515	141.404	134.598	125.975
157.2	152.721	141.686	141.394	134.718	126.51
157.4	150.666	142.961	140.889	133.68	125.521
157.6	149.126	142.949	142.575	133.003	126.941
157.8	149.196	142.974	141.072	131.9	125.48
158	149.309	143.521	142.14	130.216	125.588
158.2	148.367	142.76	141.575	131.678	123.324
158.4	148.274	143.401	141.139	132.678	123.946
158.6	147.55	144.571	141.17	132.023	123.213
158.8	149.371	145.112	142.864	131.774	123.535
159	150.529	143.168	142.767	132.578	123.87
159.2	150.182	142.516	143.795	131.491	125.082
159.4	152.278	142.08	146.516	129.368	125.228
159.6	154.124	142.888	145.67	130.809	123.853
159.8	152.532	143.125	144	130.663	125.224
160	150.95	144.035	143.442	129.627	124.138
160.2	151.32	145.396	145.918	129.069	124.65
160.4	147.91	145.849	144.409	128.318	126.615
160.6	151.167	144.617	145.217	130.775	125.1
160.8	152.652	143.074	144.276	130.128	125.303
161	149.364	144.391	146.465	129.314	126.322
161.2	150.622	144.007	145.692	128.629	125.494
161.4	149.984	145.864	145.709	130.945	127.198
161.6	152.05	144.738	144.511	130.603	126.564
161.8	150.773	143.995	145.47	131.842	124.654
162	149.371	143.523	144.649	133.942	124.354
162.2	149.534	143.647	145.9	133.59	124.648
162.4	150.217	142.755	144.649	132.938	123.466
162.6	146.994	142.853	146.643	134.845	123.973
162.8	150.252	143.539	147.56	133.653	123.463
163	150.703	143.535	145.872	134.065	123.163
163.2	150.8	143.457	149.159	131.73	121.78
163.4	151.009	144.929	149.312	131.448	123.961
163.6	149.42	144.584	147.96	132.286	124.747
163.8	149.192	144.468	147.262	133.089	125.589
164	149.915	144.563	147.431	132.574	124.158
164.2	152.154	144.433	145.537	134.072	123.503
164.4	153.757	144.269	146.325	134.012	126.361
164.6	154.267	142.755	146.025	133.577	125.187
164.8	154.832	140.987	146.537	132.545	124.51
165	154.5	140.007	146.572	132.313	125.351
165.2	152.414	140.4	146.359	129.91	125.554
165.4	152.002	143.049	146.702	132.241	126.326
165.6	152.451	142.272	146.038	132.756	125.214
165.8	151.438	142.204	146.904	133.955	121.83
166	150.435	138.749	148.574	131.946	122.355
166.2	148.424	140.63	145.058	133.033	123.92
166.4	148.538	139.609	143.444	134.662	123.848
166.6	146.985	139.767	144.611	134.762	123.626
166.8	147.096	138.915	142.958	133.742	123.879
167	148.736	139.006	143.747	133.649	123.556
167.2	149.238	139.967	146.436	133.596	124.857
167.4	147.904	140.147	148.764	135.425	124.607
167.6	145.248	138.139	147.867	134.204	123.728
167.8	146.904	138.368	145.938	134.912	123.96
168	146.605	136.756	147.687	131.837	124.394
168.2	148.616	138.232	147.217	133.144	125.772
168.4	149.055	136.237	147.459	131.852	126.03
168.6	151.874	136.951	147.703	131.368	126.272
168.8	151.87	135.337	146.514	132.474	127.511
169	150.731	133.383	147.346	132.995	127.669
169.2	148.209	134.805	147.017	134.152	127.599
169.4	149.417	136.539	145.282	132.61	128.01
169.6	148.247	135.767	144.589	130.928	129.745
169.8	146.647	134.605	144.919	129.89	129.025
170	150.322	135.784	146.09	131.043	127.447
170.2	150.068	134.537	147.147	130.143	127.419
170.4	149.699	136.438	145.846	132.92	126.497
170.6	149.761	135.815	145.021	131.568	127.897
170.8	149.704	133.957	145.195	131.656	128.001
171	148.409	134.349	145.433	132.394	128.501
171.2	148.426	134.534	146.029	132.318	127.491
171.4	148.17	133.998	145.329	131.764	128.947
171.6	148.543	132.188	143.92	132.67	128.218
171.8	151.153	131.066	143.717	132.716	127.943
172	151.858	133.898	144.788	133.705	127.724
172.2	152.214	133.768	145.012	133.33	129.016
172.4	151.732	131.047	145.139	134.549	128.87
172.6	149.587	132.264	145.774	134.622	129.207
172.8	148.916	131.22	146.642	134.164	128.837
173	150.797	130.909	145.008	134.225	127.802
173.2	151.871	129.945	147.093	133.325	126.952
173.4	148.084	132.975	147.717	134.182	128.21
173.6	147.496	133.825	148.371	133.385	127.233
173.8	150.954	133.82	148.386	135.592	127.248
174	151.74	133.275	148.613	136.468	127.234
174.2	149.757	134.088	147.964	136.369	126.729
174.4	149.916	133.104	147.591	138.119	126.469
174.6	150.363	132.797	147.372	138.076	124.178
174.8	150.759	133.016	147.898	137.662	124.378
175	148.275	132.208	146.981	137.193	125.435
175.2	148.059	133.232	148.409	136.562	126.49
175.4	146.027	131.365	148.791	137.052	125.895
175.6	144.88	133.149	147.689	138.167	125.979
175.8	146.02	130.11	149.092	136.957	126.956
176	145.157	129.902	149.168	136.973	124.723
176.2	144.585	129.541	148.06	138.12	125.461
176.4	145.038	130.288	147.567	135.63	124.425
176.6	147.385	132.205	149.184	134.258	125.26
176.8	148.064	129.674	146.471	137.551	124.249
177	149.274	129.45	148.093	135.065	125.607
177.2	146.684	130.622	146.941	137.598	125.581
177.4	144.828	131.493	147.052	137.288	123.069
177.6	146.644	131.544	148.748	135.376	124.711
177.8	145.226	132.077	148.473	135.963	122.663
178	142.741	132.277	149.616	136.51	123.131
178.2	145.006	132.285	149.384	135.249	125.633
178.4	144.742	132.63	148.241	134.646	126.165
178.6	144.68	131.751	148.462	135.726	126.048
178.8	144.702	132.421	148.696	137.903	125.771
179	143.515	132.332	147.058	137.695	124.647
179.2	143.059	132.972	143.679	139.39	125.023
179.4	142.909	134.57	142.16	139.124	124.835
179.6	141.782	134.443	142.527	140.359	126.16
179.8	143.89	135.181	143.783	139.47	127.093
180	143.019	135.88	142.578	139.528	124.517
180.2	144.155	135.035	143.114	140.172	127.51
180.4	147.754	135.38	142.114	140.251	127.409
180.6	148.819	132.571	143.782	140.116	125.305
180.8	146.835	132.751	142.151	140.152	126.031
181	147.887	129.868	143.295	140.151	124.974
181.2	147.937	131.497	143.574	138.774	125.471
181.4	146.133	131.01	140.225	138.274	125.256
181.6	145.963	129.911	141.878	136.648	125.447
181.8	144.53	130.232	141.496	137.929	124.568
182	145.04	129.01	144.113	140.109	125.78
182.2	145.591	130.128	144.183	138.76	125.062
182.4	148.267	131.693	144.967	140.576	125.88
182.6	145.646	131.699	144.527	143.394	123.882
182.8	145.615	130.886	144.157	141.611	124.552
183	145.826	130.797	143.793	140.13	126.342
183.2	144.653	131.711	144.579	140.339	126.068
183.4	146.063	132.402	145.875	141.017	126.188
183.6	146.772	131.417	145.022	139.053	126.283
183.8	145.882	132.496	145.078	140.464	126.257
184	147.04	132.087	143.663	138.725	125.199
184.2	146.007	131.176	143.247	138.891	124.98
184.4	146.098	130.343	143.545	137.78	125.149
184.6	145.702	131.159	141.556	138.145	126.112
184.8	148.466	130.339	141.173	141.235	125.185
185	146.201	131.757	141.251	139.362	123.938
185.2	145.273	131.535	140.743	140.543	125.53
185.4	146.69	130.156	138.844	140.872	124.333
185.6	147.618	130.487	139.618	141.805	125.564
185.8	146.382	129.121	140.499	141.649	126.106
186	145.684	131.528	140.741	141.837	125.8
186.2	145.124	133.084	141.543	140.514	125.292
186.4	146.423	132.834	141.791	136.471	125.87
186.6	149.047	133.873	142.062	138.961	126.285
186.8	147.115	133.661	141.846	138.438	126.687
187	145.306	133.69	143.55	139.29	127.458
187.2	145.725	132.19	142.483	139.773	125.477
187.4	146.107	133.431	141.603	139.84	127.087
187.6	146.473	133.938	141.464	139.646	125.953
187.8	146.422	131.875	140.234	140.513	125.498
188	146.605	129.763	140.151	141.572	125.153
188.2	146.675	131.855	139.849	143.114	125.353
188.4	148.582	132.688	140.387	144.765	124.857
188.6	145.114	134.106	140.457	144.468	125.901
188.8	147.711	133.519	140.549	144.245	125.223
189	147.56	130.94	139.989	144.124	126.099
189.2	147.789	131.865	138.838	142.8	126.475
189.4	146.398	131.425	137.134	143.249	126.252
189.6	145.891	132.524	137.394	145.559	124.7
189.8	147.207	132.532	137.653	145.168	126.675
190	147.361	132.286	137.611	145.923	126.168
190.2	145.044	131.059	138.938	145.29	126.942
190.4	144.373	133.425	137.257	144.999	128.287
190.6	147.002	133.419	140.172	142.017	128.833
190.8	146.655	134.109	141.46	141.983	128.349
191	145.445	135.406	142.43	142.307	128.714
191.2	144.777	134.465	140.784	141.252	127.904
191.4	144.485	134.987	140.374	143.2	128.449
191.6	144.052	136.418	142.383	144.486	127.678
191.8	143.808	137.009	142.719	145.7	127.359
192	146.209	133.902	140.74	142.599	125.633
192.2	146.759	135.523	141.711	141.348	126.015
192.4	144.375	134.474	141.846	143.915	125.575
192.6	146.123	133.696	142.838	141.206	123.889
192.8	146.15	135.265	144.615	140.653	123.342
193	147.065	132.655	144.405	140.601	123.163
193.2	149.052	131.933	144.359	140.914	123.616
193.4	149.582	132.944	144.078	141.046	124.93
193.6	146.753	133.453	145.398	139.278	124.261
193.8	147.188	132.899	145.346	137.068	123.788
194	149.143	133.507	146.485	138.479	122.035
194.2	149.42	131.937	147.607	138.177	122.154
194.4	148.278	131.771	148.949	137.507	122.208
194.6	147.953	129.462	147.262	138.026	121.942
194.8	146.648	130.647	147.585	141.054	122.043
195	149.153	131.722	147.763	139.245	123.339
195.2	148.907	130.377	145.834	137.681	123.31
195.4	149.082	130.329	144.369	136.873	122.221
195.6	148.981	129.898	145.385	135.943	122.695
195.8	150.566	129.319	144.268	136.99	122.984
196	151.752	127.647	145.36	133.827	125.016
196.2	150.858	130.54	144.226	136.383	126.246
196.4	150.37	129.119	144.811	137.516	125.55
196.6	151.665	128.817	144.417	139.065	125.379
196.8	153.375	129.873	144.322	137.474	124.522
197	152.823	130.145	142.82	138.543	124.341
197.2	152.004	129.652	143.659	140.917	128.714
197.4	155.662	129.76	143.848	141.354	127.64
197.6	156.964	128.845	145.534	140.627	127.222
197.8	156.431	130.201	143.559	137.697	128.265
198	157.071	128.902	144.359	137.895	127.91
198.2	155.651	130.636	145.082	137.465	127.782
198.4	156.114	132.01	145.753	135.662	127.242
198.6	156.74	132.469	143.505	135.274	127.329
198.8	157.451	131.269	143.743	131.482	127.714
199	157.069	129.656	143.687	130.193	128.073
199.2	155.48	131.199	142.495	130.299	128.914
199.4	154.087	130.36	143.511	129.493	128.607
199.6	155.395	129.649	143.854	133.295	127.388
199.8	155.398	131.712	143.894	131.209	128.625
200	154.595	130.119	145.308	131.799	128.521
200.2	153.795	130.111	143.87	130.386	127.619
200.4	152.422	131.854	144.156	132.684	127.353
200.6	154.478	133.42	144.231	132.659	127.369
200.8	152.514	130.088	145.259	132.311	126.662
201	153.247	129.933	144.809	130.389	126.039
201.2	152.475	129.771	147.852	129.534	125.375
201.4	153.221	131.39	147.994	130.6	124.868
201.6	154.962	131.073	145.632	130.755	124.754
201.8	153.38	131.693	146.663	132.423	124.812
202	155.754	134.51	145.854	131.53	124.439
202.2	155.676	133.621	146.25	132.723	124.372
202.4	156.72	133.666	145.716	129.98	126.262
202.6	155.336	135.491	145.985	131.506	125.037
202.8	153.589	136.324	147.948	132.829	124.207
203	152.709	136.105	148.149	131.968	124.319
203.2	153.943	137.441	146.26	128.997	124.75
203.4	153.318	136.679	147.387	132.496	126.465
203.6	151.454	137.559	146.559	133.407	126.444
203.8	152.126	138.699	146.34	131.72	124.759
204	152.616	138.094	144.772	134.314	124.436
204.2	153.647	138.147	144.353	135.378	126.711
204.4	155.196	139.051	141.983	133.058	126.249
204.6	155.885	137.926	142.599	131.335	127.289
204.8	155.57	137.154	142.142	132.07	127.211
205	155.505	137.491	143.585	128.849	127.504
205.2	154.138	139.731	144.699	131.935	128.927
205.4	155.819	139.892	145.076	130.485	130.203
205.6	155.875	140.031	143.16	132.783	129.64
205.8	155.072	138.147	142.788	132.252	130.22
206	151.886	136.917	143.221	133.465	129.708
206.2	153.12	136.79	141.108	135.214	131.743
206.4	150.603	135.102	140.86	134.307	132.907
206.6	152.177	135.531	141.246	137.428	131.24
206.8	151.236	137.356	139.573	138.903	129.542
207	152.269	139.419	140.661	136.376	128.697
207.2	153.155	139.038	140.859	137.348	128.212
207.4	150.37	139.529	139.28	136.276	128.903
207.6	150.12	138.98	140.669	134.706	129.14
207.8	150.037	138.352	141.591	134.747	129.528
208	150.189	137.746	139.374	134.418	129.446
208.2	151.208	138.146	140.103	134.327	129.837
208.4	152.24	139.085	139.841	132.488	132.319
208.6	150.436	139.278	142.168	134.452	130.805
208.8	151.014	139.47	141.661	138.259	133.005
209	152.756	138.426	140.994	136.27	130.443
209.2	154.684	139.276	143.782	134.67	129.408
209.4	154.024	141.827	143.545	135.383	129.05
209.6	153.286	140.974	140.26	133.514	130.074
209.8	153.082	142.053	141.626	131.784	130.078
210	152.527	140.612	141.492	133.173	130.077
210.2	149.881	141.135	143.029	131.144	126.648
210.4	150.632	141.224	140.718	131.534	128.569
210.6	150.032	141.838	140.221	131.412	126.936
210.8	151.445	141.409	142.514	132.297	127.627
211	149.54	141.852	143.331	132.359	129.705
211.2	147.477	139.287	141.699	130.789	130.4
211.4	148.452	140.372	142.15	132.573	130.3
211.6	146.901	138.812	141.913	133.346	128.373
211.8	145.807	139.168	140.963	132.078	127.87
212	145.662	140.969	141.338	133.579	127.576
212.2	144.955	140.113	141.564	133.032	127.624
212.4	147.064	140.049	141.164	132.623	126.27
212.6	147.882	140.45	141.807	131.808	127.266
212.8	149.755	139.258	141.054	132.619	127.683
213	149.011	138.736	143.076	131.101	126.451
213.2	149.329	138.946	144.105	129.663	128.335
213.4	150.321	138.978	144.123	129.763	129.23
213.6	149.276	140.268	142.696	130.1	129.306
213.8	149.14	140.035	143.622	131.233	129.061
214	150.798	142.459	142.014	130.258	129.504
214.2	150.283	142.422	141.366	129.798	130.363
214.4	150.326	142.493	142.647	129.601	129.969
214.6	151.235	142.814	140.222	130.05	129.536
214.8	151.256	142.311	140.942	128.088	129.085
215	150.778	142.921	141.622	130.077	130.598
215.2	151.76	142.5	140.442	129.384	127.825
215.4	150.047	143.392	140.003	130.821	128.491
215.6	149.923	143.963	140.722	130.611	128.07
215.8	150.691	142.132	140.281	129.319	128.543
216	149.366	143.339	139.947	131.337	128.97
216.2	148.649	142.255	140.324	131.849	128.325
216.4	148.619	143.876	141.715	127.569	127.036
216.6	148.601	141.189	139.946	129.353	128.715
216.8	149.213	141.166	139.641	128.27	130.849
217	149.754	143.007	140.143	128.867	129.268
217.2	148.549	143.539	138.761	130.439	130.04
217.4	148.706	143.76	138.372	129.355	130.131
217.6	149.499	140.269	139.481	129.621	129.467
217.8	148.603	141.707	137.846	129.646	130.825
218	148.967	141.842	139.517	129.287	130.167
218.2	149.094	144.018	137.862	128.369	128.781
218.4	148.241	142.629	137.287	129.476	129.659
218.6	148.059	141.089	139.201	129.314	131.16
218.8	148.556	140.867	138.328	126.436	129.436
219	148.848	140.982	138.665	130.07	130.14
219.2	148.111	139.428	138.804	129.155	130.366
219.4	149.042	139.024	139.451	128.726	129.828
219.6	150.567	140.167	139.305	129.694	128.277
219.8	149.003	142.599	138.286	128.205	129.528
220	148.442	143.876	138.562	126.382	128.39
220.2	147.462	144.521	138.2	125.764	129.71
220.4	144.769	143.264	138.716	125.308	128.8
220.6	145.638	144.155	138.744	126.33	129.574
220.8	145.794	145.014	139.061	125.444	129.913
221	144.291	145.664	138.516	124.734	128.799
221.2	146.041	145.271	139.333	125.051	129.187
221.4	144.015	143.908	138.796	127.163	128.49
221.6	144.354	143.06	139.231	127.649	128.029
221.8	142.408	142.301	139.778	129.277	127.931
222	143.57	144.093	140.753	127.758	130.854
222.2	144.459	144.263	140.006	127.816	130.768
222.4	144.72	143.598	139.096	128.695	131.357
222.6	144.737	144.533	138.773	126.611	132.869
222.8	144.176	145.576	138.529	124.74	132.53
223	144.006	145.711	137.927	126.171	130.911
223.2	144.032	144.901	138.235	125.296	130.287
223.4	145.797	147.26	138.361	124.734	128.641
223.6	147.125	146.772	137.749	125.669	128.919
223.8	148.785	144.756	137.928	127.237	127.917
224	149.336	145.273	137.727	128.119	126.796
224.2	148.411	147.701	137.258	127.687	126.189
224.4	149.84	147.716	137.939	129.022	129.224
224.6	149.999	147.796	137.639	127.6	126.038
224.8	149.582	149.811	137.454	127.434	126.929
225	148.476	148.913	137.903	128.976	128.709
225.2	148.02	147.387	138.523	129.027	129.539
225.4	149.794	146.529	139.846	130.645	129.476
225.6	150.274	146.695	137.237	130.783	129.105
225.8	149.733	148.218	138.545	132.803	129.381
226	148.824	150.881	137.123	131.398	127.788
226.2	149.609	147.227	138.216	128.347	127.062
226.4	151.295	145.578	138.035	127.931	128.065
226.6	152.046	144.664	136.236	126.492	129.28
226.8	150.225	145.731	137.213	129.364	126.945
227	150.177	147.032	137.888	128.126	128.394
227.2	151.701	146.527	137.925	129.06	128.043
227.4	150.516	144.764	137.661	129.107	126.772
227.6	150.207	144.113	137.331	129.675	126.518
227.8	150.543	140.33	137.761	126.977	125.09
228	147.97	142.092	137.637	129.186	126.659
228.2	146.11	140.45	136.654	126.325	128.622
228.4	148.166	141.713	137.58	127.009	126.356
228.6	147.28	141.897	138.209	129.875	125.681
228.8	146.425	141.17	138.084	130.32	122.754
229	147.557	142.431	138.348	129.425	125.828
229.2	147.689	139.726	139.093	129.241	124.817
229.4	146.952	141.222	138.573	128.327	125.765
229.6	145.949	141.197	138.344	128.013	127.794
229.8	147.284	141.288	138.609	128.3	125.478
230	146.579	141.598	138.313	127.848	124.902
230.2	146.204	142.356	137.639	126.907	124.426
230.4	146.099	142.316	138.194	125.422	124.4
230.6	145.455	141.746	139.032	128.284	123.694
230.8	147.054	141.593	137.621	128.774	125.448
231	147.791	144.083	136.596	130.804	123.179
231.2	148.12	143.746	138.577	131.237	124.973
231.4	148.084	142.898	138.469	129.662	123.689
231.6	147.35	142.41	137.897	128.144	124.192
231.8	147.37	143.718	138.039	127.563	123.574
232	147.923	138.47	137.197	123.551	123.445
232.2	149.103	138.554	136.019	125.158	123.715
232.4	148.04	138.514	137.455	125.398	124.748
232.6	147.959	138.587	136.03	126.157	124.418
232.8	146.947	138.118	136.988	127.757	123.096
233	146.977	139.65	137.126	127.183	123.426
233.2	147.195	140.56	136.136	126.575	123.542
233.4	145.558	140.331	134.757	125.18	121.625
233.6	147.173	142.168	134.006	127.084	123.412
233.8	145.839	139.816	133.281	127.662	124.282
234	145.03	137.605	134.792	128.167	124.222
234.2	146.835	138.295	136.87	126.688	123.592
234.4	147.701	136.797	135.538	127.676	121.9
234.6	147.066	138.909	134.089	129.545	122.79
234.8	147.102	138.01	134.499	131.803	123.139
235	148.031	136.672	133.727	132.432	122.48
235.2	148.675	138.207	133.773	133.373	122.555
235.4	149.441	138.603	134.065	131.872	122.278
235.6	151.465	137.286	135.078	134.117	122.838
235.8	150.541	136.815	136.779	130.203	122.657
236	149.005	137.55	135.78	129.629	122.557
236.2	150.291	136.494	135.235	131.811	122.322
236.4	151.173	136.937	136.293	129.975	122.75
236.6	151.963	137.898	136.865	127.747	123.677
236.8	150.814	137.945	137.62	129.065	123.525
237	150.446	139.983	136.329	128.961	124.865
237.2	150.925	138.064	136.962	128.931	125.707
237.4	151.466	138.565	136.793	128.996	124.473
237.6	151.334	141.64	137.153	129.777	125.284
237.8	152.066	143.215	136.525	129.462	126.647
238	152.007	141.872	136.205	127.825	124.605
238.2	150.25	143.149	137	126.273	124.8
238.4	148.679	140.132	139.619	125.417	125.693
238.6	151.165	139.703	139.953	126.417	125.795
238.8	149.617	140.528	140.03	124.427	126.65
239	152.307	141.871	140.331	126.214	127.159
239.2	150.532	142.564	136.258	126.078	125.259
239.4	151.346	143.599	136.075	126.047	126.931
239.6	150.532	141.33	135.735	126.407	127.896
239.8	151.798	142.812	133.702	126.063	127.238
240	153.448	143.029	135.234	126.746	126.789
240.2	152.256	143.138	135.289	126.834	126.101
240.4	150.603	144.43	135.74	124.684	126.471
240.6	148.144	143.854	136.365	125.785	127.601
240.8	150.753	142.011	137.014	127.905	125.745
241	150.824	143.116	137.657	126.656	126.197
241.2	152.042	144.469	137.802	125.974	126.264
241.4	151.414	143.397	137.031	125.896	125.959
241.6	152.415	143.62	139.022	127.221	127.217
241.8	151.823	144.984	137.419	127.95	126.17
242	151.85	144.388	138.36	128.49	125.949
242.2	150.467	142.875	137.366	127.143	127.244
242.4	150.131	143.229	137.549	127.731	126.133
242.6	150.047	141.925	139.633	126.898	128.154
242.8	149.605	141.459	139.635	127.231	127.092
243	147.99	140.171	137.999	125.906	126.034
243.2	147.777	143.147	139.816	126.584	125.845
243.4	149.464	142.912	138.19	126.237	127.364
243.6	149.371	144.91	139.298	127.293	128.824
243.8	150.986	144.875	138.637	126.919	127.997
244	149.597	146.793	139.687	124.957	129.04
244.2	149.671	147.006	138.595	125.195	128.003
244.4	149.974	145.734	138.863	126.186	127.464
244.6	149.104	145.293	137.285	126.499	127.223
244.8	150.168	145.297	139.319	127.634	127.299
245	148.913	144.908	137.846	124.99	127.975
245.2	148.656	147.461	138.31	126.877	129.247
245.4	148.623	146.341	137.825	125.839	129.694
245.6	149.2	146.532	140.449	125.879	128.224
245.8	148.238	145.766	139.856	126.19	129.49
246	149.067	145.776	139.967	126.636	128.308
246.2	148.534	146.292	138.922	126.079	128.643
246.4	148.033	145.37	138.701	127.186	129.856
246.6	149.201	143.828	137.922	128.443	129.025
246.8	147.901	143.93	139.997	126.532	127.821
247	149.294	145.838	139.957	127.004	129.003
247.2	148.856	143.987	139.064	125.391	129.513
247.4	149.36	146.85	136.99	128.257	128.101
247.6	149.114	147.202	136.747	126.588	128.278
247.8	150.211	145.955	141.036	126.995	128.326
248	148.476	147.75	141.093	127.675	127.808
248.2	147.1	146.138	140.631	128.354	126.641
248.4	148.231	145.784	141.167	128.351	126.005
248.6	148.507	143.129	140.718	129.019	127.155
248.8	148.822	141.821	141.754	128.649	127.446
249	148.343	143.449	140.017	130.152	127.398
249.2	149.218	143.909	137.924	129.562	126.355
249.4	146.905	144.094	138.87	128.387	125.24
249.6	147.361	146.871	138.327	127.859	128.062
249.8	146.184	144.665	136.641	127.844	127.507
250	145.609	146.371	138.112	127.332	128.627
250.2	146.991	144.311	136.047	128.611	127.182
250.4	147.555	146.01	135.982	127.865	127.866
250.6	146.998	146.548	134.466	128.399	126.903
250.8	148.317	147.241	134.009	128.311	127.015
251	149.78	147.599	134.409	128.3	127.532
251.2	148.345	145.644	134.563	127.947	126.709
251.4	146.208	146.669	134.792	128.771	128.057
251.6	143.813	146.409	134.206	128.041	128.397
251.8	146.677	146.628	136.21	128.4	128.613
252	145.672	148.312	136.075	128.552	128.687
252.2	144.669	149.076	135.122	130.489	127.391
252.4	144.036	148.722	136.616	129.582	128.23
252.6	145.923	148.657	136.901	129.72	127.089
252.8	146.653	147.641	139.044	130.59	126.504
253	147.744	147.322	138.849	128.443	127.326
253.2	149.515	148.241	141.79	128.089	127.235
253.4	150.434	145.992	140.934	130.049	126.494
253.6	153.839	146.471	140.178	131.601	126.043
253.8	154.301	146.421	140.139	130.082	126.104
254	157.421	146.158	139.467	129.249	129.068
254.2	157.336	146	138.279	130.788	129.207
254.4	155.983	147.364	138.669	130.954	128.761
254.6	155.925	146.128	139.564	131.216	130.039
254.8	154.022	146.06	139.935	132.722	130.306
255	155.741	145.236	140.25	132.763	129.268
255.2	156.334	145.221	140.6	132.002	127.875
255.4	156.509	145.121	137.935	132.559	128.831
255.6	155.422	145.993	138.925	131.655	127.781
255.8	156.843	144.233	139.369	130.477	128.188
256	156.761	142.987	139.124	129.723	128.72
256.2	155.784	145.288	137.337	130.035	128.504
256.4	156.444	144.105	137.213	129.67	130.13
256.6	154.431	145.665	138.384	129.204	129.482
256.8	153.855	145.935	138.968	129.856	129.249
257	153.112	146.211	138.69	128.707	128.603
257.2	152.932	146.479	138.908	129.032	128.262
257.4	153.292	146.476	138.751	130.023	126.08
257.6	153.712	145.93	140.177	128.839	126.535
257.8	154.012	147.708	139.424	129.127	127.537
258	154.37	145.979	140.791	130.031	128.658
258.2	154.722	146.59	141.076	129.674	128.091
258.4	155.761	147.708	141.528	130.939	126.723
258.6	153.486	146.718	142.497	131.307	125.285
258.8	155.143	146.153	142.016	130.005	126.265
259	154.323	147.165	142.887	130.059	125.68
259.2	155.079	147.872	142.598	130.49	125.287
259.4	154.987	149.262	142.069	130.708	127.016
259.6	155.657	149.859	142.301	130.099	128.266
259.8	155.789	148.738	142.37	131.626	129.23
260	154.836	147.439	145.121	130.033	129.985
260.2	151.797	147.548	143.298	129.402	129.695
260.4	150.442	145.883	141.28	129.381	131.014
260.6	149.407	146.833	140.99	129.585	130.474
260.8	150.644	146.585	139.68	129.089	130.208
261	150.789	146.346	139.114	129.979	132.248
261.2	151.09	147.807	140.716	130.763	132.216
261.4	149.479	148.312	141.687	129.937	132.789
261.6	148.018	149.685	139.47	131.624	131.725
261.8	149.181	150.195	138.722	130.373	132.485
262	149.613	149.506	137.507	130.167	133.431
262.2	147.018	149.128	138.391	129.799	132.537
262.4	147.073	147.193	137.674	130.933	131.838
262.6	146.419	146.772	139.017	131.043	132.473
262.8	144.388	147.492	138.474	132.484	133.661
263	143.939	148.349	139.903	132.264	133.966
263.2	144.288	147.998	137.84	131.351	134.93
263.4	143.583	149.996	137.503	131.95	136.424
263.6	142.651	150.311	136.043	131.793	134.355
263.8	143.187	150.331	137.571	131.608	134.764
264	142.546	149.803	138.404	131.994	134.143
264.2	142.99	149.807	138.044	132.746	132.855
264.4	144.459	149.671	139.324	131.007	134.221
264.6	144.827	151.735	140.305	131.112	135.082
264.8	144.948	150.027	140.035	130.513	136.848
265	145.537	149.387	139.96	130.285	135.694
265.2	145.951	147.566	138.384	130.251	136.887
265.4	147.144	148.135	139.622	128.358	137.298
265.6	146.27	147.215	139.369	128.992	137.586
265.8	146.69	148.019	138.353	129.708	136.546
266	146.003	144.848	139.557	128.432	134.39
266.2	145.868	146.918	140.689	128.327	136.14
266.4	144.923	145.802	141.44	130.773	136.412
266.6	144.01	148.055	141.637	131.259	135.551
266.8	145.521	148.323	142.969	131.063	134.117
267	145.592	148.698	141.732	129.982	132.901
267.2	145.926	149.322	142.326	128.681	132.912
267.4	145.734	149.044	142.042	128.783	132.169
267.6	145.971	147.7	141.281	128.283	132.697
267.8	146.499	146.828	139.235	127.843	133.911
268	144.434	147.248	139.791	127.713	136.076
268.2	145.465	147.88	139.195	127.764	137.162
268.4	144.08	147.415	141.361	126.685	134.634
268.6	145.858	145.609	141.599	128.797	135.636
268.8	144.341	146.95	143.007	126.032	135.703
269	143.084	146.78	142.941	127.987	135.057
269.2	145.58	146.171	143.006	127.751	134.53
269.4	143.627	146.773	145.616	128.717	135.275
269.6	142.865	146.157	142.494	127.661	134.105
269.8	143.73	146.596	141.979	127.023	134.843
270	141.803	145.411	143.446	126.886	132.685
270.2	144.136	146.911	143.538	126.752	134.424
270.4	143.179	147.312	141.52	127.915	134.325
270.6	145.32	147.207	140.925	126.079	134.635
270.8	145.671	145.899	142.128	125.864	134.391
271	145.422	145.552	142.158	124.235	135.491
271.2	144.325	146.826	141.112	124.073	133.068
271.4	145.028	146.883	141.57	124.187	135.464
271.6	144.77	146.489	141.794	123.563	137.406
271.8	141.57	148.526	141.45	124.117	135.455
272	142.253	148.022	143.185	124.97	135.663
272.2	142.218	150.827	142.838	123.278	136.548
272.4	143.115	149.011	141.378	123.148	135.958
272.6	143.131	150.801	140.712	125.063	134.343
272.8	142.984	151.351	140.811	126.763	134.461
273	144.885	149.77	139.617	128.023	134.858
273.2	145.391	149.351	143.498	126.141	133.547
273.4	144.313	149.359	142.629	123.963	131.487
273.6	144.923	149.082	141.387	125.367	131.682
273.8	145.059	149.169	141.802	124.199	130.287
274	144.963	147.581	140.775	126.129	131.054
274.2	146.018	147.636	142.389	128.38	130.053
274.4	146.915	148.532	142.059	127.594	131.589
274.6	145.647	148.542	142.223	127.407	135.17
274.8	145.309	145.936	142.112	128.658	135.374
275	145.23	146.12	141.483	128.49	135.119
275.2	143.775	145.483	141.58	128.667	135.184
275.4	144.904	146.207	141.263	127.756	135.518
275.6	144.265	145.393	140.951	127.188	136.518
275.8	145.387	145.715	142.705	126.333	134.554
276	144.579	145.699	141.476	127.939	135.363
276.2	145.027	147.966	139.465	128.524	135.88
276.4	147.181	147.264	138.831	129.513	134.351
276.6	145.746	147.235	140.211	130.398	136.128
276.8	150.694	147.496	141.083	129.673	135.614
277	151.623	148.405	142.651	131.031	135.082
277.2	150.276	146.059	142.709	129.365	134.055
277.4	153.485	143.832	142.249	126.981	133.72
277.6	150.729	144.641	141.563	128.047	134.049
277.8	149.087	144.04	142.671	129.109	133.126
278	149.34	145.806	144.984	130.733	132.124
278.2	149.331	144.988	143.772	129.579	132.192
278.4	149.361	146.521	143.396	132.392	133.025
278.6	150.457	145.078	142.558	131.882	133.516
278.8	149.772	143.582	142.799	132.461	132.648
279	150.177	144.335	142.007	131.839	130.869
279.2	151.975	145.042	143.662	132.069	130.38
279.4	152.425	142.743	143.397	131.069	130.885
279.6	150.217	142.454	143.219	131.927	130.317
279.8	151.235	143.352	142.872	132.679	131.482
280	150.762	143.432	142.508	131.186	130.078
280.2	152.861	144.685	144.016	131.165	129.995
280.4	152.782	144.741	144.594	133.98	130.062
280.6	149.281	145.498	143.858	130.745	128.712
280.8	149.394	145.912	143.87	132.161	129.752
281	149.686	143.114	145.016	133.756	129.821
281.2	147.335	145.122	144.421	132.93	129.602
281.4	145.677	143.212	142.444	134.411	127.41
281.6	144.907	145.794	143.781	133.872	129.81
281.8	145.402	144.087	144.541	133.722	128.772
282	146.848	144.735	142.574	137.079	128.549
282.2	146.679	148.3	140.927	135.383	130.124
282.4	147.02	146.079	143.43	136.005	129.006
282.6	147.438	145.39	142.321	135.366	128.018
282.8	145.484	143.901	143.021	135.229	129.207
283	145.327	145.369	143.183	135.93	129.382
283.2	144.758	145.061	144.778	135.659	129.396
283.4	145.026	143.871	143.83	136.675	126.718
283.6	144.166	143.166	145.589	135.748	128.846
283.8	145.231	141.757	144.504	137.243	129.942
284	145.707	141.259	143.809	136.803	129.83
284.2	143.577	140.177	143.823	138.073	128.869
284.4	145.023	140.278	145.518	137.292	130.54
284.6	145.939	142.385	144.679	136.153	129.969
284.8	144.717	143.946	144.825	138.894	130.604
285	145.504	146.659	143.7	136.458	131.963
285.2	146.597	148.227	144.692	133.287	132.442
285.4	146.399	149.662	145.956	133.848	132.806
285.6	146.702	150.032	144.729	135.009	133.122
285.8	145.853	152.251	144.455	135.467	132.983
286	146.633	154.218	143.805	134.862	132.307
286.2	148.146	150.613	143.369	133.132	131.493
286.4	145.828	148.928	145.948	132.893	131.392
286.6	146.397	147.091	147.655	133.363	131.805
286.8	147.544	147.859	147.512	132.984	131.345
287	145.594	150.001	147.297	133.276	130.417
287.2	144.303	150.097	147.874	133.414	130.219
287.4	145.977	148.531	147.971	134.116	129.399
287.6	147.001	148.117	148.786	134.186	129.302
287.8	148.036	151.176	150.457	133.574	129.552
288	147.032	148.861	150.538	135.685	131.124
288.2	145.862	149.026	150.408	134.33	131.365
288.4	146.245	149.579	149.692	134.701	130.848
288.6	146.31	149.714	149.53	133.884	131.058
288.8	144.339	148.812	149.928	135.111	129.497
289	146.717	149.907	149.398	133.052	129.563
289.2	144.864	149.445	150.447	133.01	128.301
289.4	144.519	148.953	149.145	130.988	130.441
289.6	145.642	146.105	149.018	131.88	129.636
289.8	147.549	145.751	149.934	131.538	130.227
290	147.033	147.289	149.71	131.082	129.117
290.2	147.146	146.593	149.336	131.374	128.96
290.4	145.784	146.56	150.48	131.185	129.049
290.6	146.808	146.182	151.232	131.763	129.56
290.8	148.173	149.388	150.082	132.153	129.173
291	148.093	148.228	151.342	132.622	127.981
291.2	149.131	147.874	150.457	133.991	127.998
291.4	147.692	146.55	150.31	134.08	126.653
291.6	145.33	146.329	146.604	133.876	127.367
291.8	146.463	144.593	149.204	133.815	127.375
292	145.917	146.386	149.986	132.94	124.937
292.2	146.041	142.966	146.837	132.435	125.498
292.4	146.028	143.722	148.656	133.369	124.842
292.6	145.175	143.982	145.382	131.829	124.987
292.8	147.06	148.386	144.219	131.275	126.286
293	146.607	146.669	146.82	132.253	124.878
293.2	147.771	147.618	146.041	132.857	124.989
293.4	145.799	148.684	148.802	133.86	124.08
293.6	145.926	150.4	148.136	132.888	125.855
293.8	145.793	152.716	148.75	133.721	125.534
294	146.945	153.246	149.338	132.229	126.434
294.2	145.367	153.716	146.376	131.556	124.474
294.4	146.789	152.092	145.186	130.857	123.712
294.6	145.873	149.577	144.588	129.342	124.722
294.8	145.883	151.295	145.069	130.292	126.29
295	145.032	152.514	143.716	127.092	126.462
295.2	145.974	152.055	143.626	128.403	125.865
295.4	145.47	151.703	142.883	127.758	126.922
295.6	144.887	149.664	143.689	126.641	126.877
295.8	145.026	153.61	145.045	123.689	124.641
296	145.427	151.756	142.598	124.566	126.617
296.2	145.181	152.884	142.833	125.128	126.227
296.4	144.84	151.922	142.963	125.43	125.25
296.6	142.763	149.769	140.509	125.114	125.507
296.8	142.724	149.552	142.016	125.22	126.189
297	144.022	149.005	142.901	126.338	124.419
297.2	144.467	147.046	143.596	127.97	125.665
297.4	144.549	147.131	142.849	127.641	127.872
297.6	142.346	146.466	144.189	125.426	126.981
297.8	143.529	146.422	142.494	124.185	127.575
298	143.334	145.355	140.664	123.599	127.162
298.2	142.44	144.029	140.492	123.955	127.978
298.4	142.205	142.98	140.969	124.024	127.445
298.6	140.826	144.079	140.035	124.421	126.437
298.8	141.288	146.117	142.133	124.77	127.319
299	140.891	149.12	142.637	124.798	124.548
299.2	140.705	148.949	142.409	124.142	126.356
299.4	140.515	148.777	144.683	124.897	127.639
299.6	139.55	149.663	144.359	126.147	127.381
299.8	139.773	146.017	142.986	127.176	127.667
300	139.689	145.754	143.41	126.3	127.004
300.2	139.52	146.307	143.098	129.366	127.066
300.4	140.952	148.002	143.854	129.509	127.338
300.6	138.877	147.243	145.129	130.225	127.46
300.8	140.441	146.996	145.082	127.907	127.267
301	138.887	146.49	143.76	128.259	128.839
301.2	140.342	148.573	144.151	126.791	129.161
301.4	140.059	149.648	146.368	127.649	127.815
301.6	139.322	150.066	147.072	125.952	126.269
301.8	138.948	149.004	143.525	125.219	127.876
302	140.636	148.934	144.292	123.805	127.883
302.2	139.049	147.719	144.331	125.416	128.532
302.4	139.772	148.324	144.916	127.528	127.712
302.6	141.212	147.722	141.465	126.864	127.908
302.8	140.887	146.056	142.871	128.239	127.376
303	142.46	145.026	144.453	130.542	129.477
303.2	141.927	143.277	142.92	132.513	127.909
303.4	140.956	143.633	142.125	129.946	127.517
303.6	142.08	142.537	143.741	130.049	128.445
303.8	143.05	144.446	141.974	129.343	128.101
304	142.517	146.303	141.48	131.209	128.187
304.2	144.793	146.425	142.361	133.85	130.342
304.4	142.765	144.279	143.318	134.434	131.581
304.6	143.168	146.73	143.708	132.265	129.201
304.8	141.491	148.228	142.578	131.197	128.394
305	142.067	147.068	142.867	132.015	129.056
305.2	143.431	148.92	141.356	130.879	128.224
305.4	142.823	151.217	142.634	131.039	128.398
305.6	142.876	150.069	142.744	128.758	128.906
305.8	142.518	150.465	141.807	128.236	127.93
306	141.327	149.156	143.076	127.205	128.335
306.2	141.243	150.444	143.579	125.196	126.509
306.4	139.857	149.187	145.855	126.355	126.754
306.6	142.839	147.054	146.548	127.123	127.598
306.8	143.503	148.26	144.467	128.569	127.962
307	143.77	148.718	143.301	126.201	127.735
307.2	143.069	147.855	142.673	126.198	128.469
307.4	141.443	149.287	143.747	125.51	128.88
307.6	141.788	150.194	143.966	124.386	131.254
307.8	140.785	150.561	142.503	126.305	129.91
308	141.804	149.3	142.316	124.041	130.431
308.2	145.789	150.113	143.626	125.002	131.325
308.4	144.516	147.241	143.034	123.355	131.471
308.6	141.922	146.667	141.527	127.088	130.337
308.8	142.891	146.885	141.774	125.747	131.709
309	142.088	145.284	143.549	126.832	130.845
309.2	143.64	144.601	143.912	127.003	130.586
309.4	142.012	143.104	143.168	127.437	130.239
309.6	143.473	144.781	143.054	126.714	130.896
309.8	144.62	144.556	143.3	126.906	128.239
310	143.501	143.825	142.024	126.771	129.177
310.2	145.239	145.467	142.786	124.715	131.09
310.4	147.72	144.062	143.68	124.524	129.548
310.6	147.214	145.579	142.938	124.287	128.385
310.8	148.372	146.181	141.984	124.669	129.99
311	148.447	150.653	140.131	125.945	129.01
311.2	147.536	149.961	140.189	125.65	129.005
311.4	147.427	150.686	140.01	128.182	129.965
311.6	148.469	150.052	141.614	125.978	129.438
311.8	146.409	149.214	142.017	125.931	128.114
312	148.365	150.104	142.681	127.429	128.474
312.2	147.65	152.39	144.495	127.059	127.766
312.4	147.164	152.988	145.379	124.934	127.146
312.6	150.113	152.1	143.125	125.107	126.751
312.8	150.454	151.183	144.34	124.469	126.632
313	149.735	152.521	145.718	123.094	127.51
313.2	148.92	153.316	145	123.449	128.011
313.4	148.3	153.303	143.712	123.308	127.475
313.6	151.405	152.704	143.898	122.534	126.599
313.8	152.188	153.372	141.313	125.679	125.792
314	149.893	154.529	142.938	126.916	124.614
314.2	150.054	153.53	141.728	125.225	125.093
314.4	149.945	154.437	140.248	125.03	126.348
314.6	149.166	152.315	141.181	125.521	125.808
314.8	148.349	153.624	141.787	125.623	125.224
315	149.651	155.47	141.273	123.903	124.869
315.2	150.1	156.152	144.712	123.265	124.819
315.4	148.839	155.517	145.074	124.811	124.485
315.6	148.428	156.253	145.149	125.404	124.037
315.8	149.251	155.788	144.671	123.64	126.099
316	148.968	154.733	145.452	122.803	126.414
316.2	147.968	153.205	144.822	122.972	127.479
316.4	146.925	152.608	144.501	124.532	126.098
316.6	148.94	153.778	141.394	124.305	127.043
316.8	147.585	155.234	144.072	125.507	127.193
317	147.004	154.728	143.297	124.926	126.635
317.2	149.648	154.764	142.545	125.841	125.216
317.4	150.191	155.944	142.954	125.987	125.169
317.6	149.051	154.529	143.9	124.868	126.069
317.8	150.342	157.1	143.517	126.037	126.785
318	149.245	156.99	144.835	127.208	126.761
318.2	150.569	157.527	143.821	126.489	126.277
318.4	148.744	154.045	142.977	125.361	127.009
318.6	147.482	155.351	143.267	124.393	128.215
318.8	148.028	152.645	142.964	123.514	128.704
319	146.753	152.224	144.23	126.338	128.43
319.2	147.58	152.798	142.98	124.622	128.468
319.4	145.971	152.202	142.066	125.134	129.969
319.6	146.763	151.435	144.582	124.203	129.159
319.8	144.65	152.751	143.515	125.844	128.808
320	142.943	154.323	140.994	125.931	128.439
320.2	144.326	154.422	140.595	128.99	126.745
320.4	143.576	152.733	141.982	126.915	126.474
320.6	142.589	153.746	141.983	128.214	126.428
320.8	143.479	154.071	141.231	128.522	128.658
321	145.505	153.479	143.162	131.301	126.601
321.2	145.202	154.117	142.763	129.105	125.689
321.4	146.471	154.14	142.603	125.94	126.242
321.6	144.432	153.257	143.789	123.631	126.64
321.8	145.381	151.702	144.327	125.559	125.522
322	144.713	151.722	142.847	125.446	126.218
322.2	144.013	152.722	144.994	125.718	126.319
322.4	145.954	152.117	143.224	124.284	126.074
322.6	145.098	153.207	145.199	124.144	125.083
322.8	148.452	153.989	148.912	123.109	122.099
323	146.277	153.522	146.709	124.595	123.197
323.2	147.304	154.179	144.823	124.071	124.911
323.4	143.257	153.387	145.729	124.625	125.847
323.6	144.808	152.667	144.797	124.603	125.161
323.8	144.804	153.708	144.821	124.572	124.871
324	144.279	152.671	142.103	124.448	125.372
324.2	143.307	151.924	140.847	122.554	124.938
324.4	144.418	152.741	141.595	124.405	124.782
324.6	142.359	152.158	143.46	124.415	125.507
324.8	141.697	151.096	144.742	125.148	125.611
325	143.625	151.569	145.953	123.975	126.989
325.2	144.37	150.205	144.585	123.632	126.146
325.4	143.335	149.098	143.775	122.766	126.814
325.6	144.688	148.186	144.071	122.623	126.616
325.8	144.239	146.353	144.144	123.615	127.682
326	143.124	147.061	142.266	123.418	126.123
326.2	143.072	147.652	143.54	124.632	125.567
326.4	144.295	145.957	144.278	124.086	125.665
326.6	143.347	144.317	145.743	124.642	126.396
326.8	140.952	143.476	144.975	125.674	125.499
327	141.593	144.584	145.237	123.824	124.418
327.2	140.029	144.187	141.229	124.436	125.404
327.4	139.097	144.99	143.378	122.154	126.527
327.6	140.094	143.197	143.606	125.578	126.763
327.8	141.548	144.94	147.088	125.76	125.596
328	141.605	145.722	145.079	126.711	126.634
328.2	142.239	143.985	144.564	127.296	125.175
328.4	145.572	143.47	145.113	127.312	125.169
328.6	145.274	144.912	144.744	127.571	124.733
328.8	146.897	144.974	146.916	127.378	123.478
329	143.605	143.782	145.385	128.401	125.758
329.2	143.461	142.9	148.157	126.619	127.92
329.4	141.981	142.693	148.372	127.256	126.397
329.6	140.636	143.523	148.175	126.106	126.326
329.8	142.175	144.305	147.707	126.849	126.892
330	140.833	143.65	148.7	127.494	127.179
330.2	139.658	143.089	147.787	126.772	125.637
330.4	137.965	142.246	147.061	127.134	125.624
330.6	138.991	141.616	148.694	125.443	126.627
330.8	138.369	141.635	146.229	124.574	126.965
331	137.267	142.828	144.569	123.598	125.781
331.2	137.187	140.99	144.099	121.062	124.986
331.4	136.46	143.237	144.713	122.405	125.843
331.6	134.471	144.306	143.379	122.373	125.902
331.8	135.334	143.955	143.341	120.325	123.589
332	136.146	144.791	145.475	122.454	125.386
332.2	136.151	143.497	146.048	121.186	125.633
332.4	137.796	143.047	145.775	124.255	126.469
332.6	140.058	141.847	145.426	123.445	124.807
332.8	141.853	142.535	147.893	124.269	123.416
333	141.194	143.253	147.354	127.121	125.05
333.2	138.84	143.816	146.761	124.651	124.715
333.4	140.023	144.744	147.379	126.255	124.82
333.6	140.872	143.478	147.376	122.634	126.44
333.8	141.164	144.474	147.295	125.079	125.909
334	139.095	142.908	147.883	122.942	127.674
334.2	139.315	141.756	150.266	123.121	125.678
334.4	139.492	141.447	149.024	124.129	126.185
334.6	141.276	141.812	150.571	121.917	127.024
334.8	140.779	137.898	151.513	124.113	125.988
335	139.584	141.332	151.309	124.924	126.391
335.2	139.363	140.599	150.502	124.815	127.372
335.4	139.25	143.533	149.17	125.853	125.906
335.6	138.794	141.98	147.741	126.791	126.586
335.8	140.497	143.706	148.1	127.086	125.445
336	141.262	144.26	148.696	127.865	123.687
336.2	141.107	143.246	146.801	128.354	125.718
336.4	139.404	144.552	148.228	128.105	126.327
336.6	139.58	142.856	146.627	126.711	126.081
336.8	141.484	146.425	144.74	128.162	125.718
337	144.625	144.969	142.994	128.595	125.654
337.2	142.166	145.304	142.932	128.95	124.59
337.4	142.298	144.848	143.474	127.503	123.852
337.6	140.996	147.702	145.644	125.719	123.182
337.8	138.138	146.971	145.322	128.253	124.528
338	139.15	149.253	146.152	128.424	125.415
338.2	138.72	149.232	146.029	129.493	125.763
338.4	139.223	150.09	145.199	128.564	124.923
338.6	139.115	152.362	144.632	128.069	124.229
338.8	139.505	153.848	143.032	127.901	122.315
339	142.082	153.381	142.046	126.39	124.791
339.2	141.319	152.632	140.892	125.415	124.206
339.4	139.262	155.723	140.538	124.417	124.555
339.6	138.049	153.63	143.506	123.111	125.135
339.8	140.411	154.756	141.62	123.973	126.117
340	143.065	152.902	143.567	123.751	125.486
340.2	142.525	155.349	142.175	122.121	127.214
340.4	141.69	156.1	140.854	123.574	126.896
340.6	139.957	156.207	140.99	123.38	126.525
340.8	143.317	158.465	139.255	122.331	126.711
341	141.696	156.141	139.938	121.291	125.922
341.2	142.311	152.985	138.991	121.695	127.852
341.4	143.855	152.085	136.997	123.023	126.635
341.6	145.015	152.199	137.906	123.598	126.573
341.8	143.197	152.044	138.666	123.577	126.414
342	143.97	149.36	137.845	125.42	126.685
342.2	142.154	152.34	137.885	125.533	127.568
342.4	141.342	150.628	140.196	126.548	127.574
342.6	140.038	150.224	143.324	125.486	128.148
342.8	141.397	152.528	141.435	125.89	127.794
343	142.371	153.716	141.021	125.246	127.618
343.2	145.22	153.131	139.582	124.919	127.571
343.4	142.759	151.444	143.758	126.319	127.332
343.6	145.913	148.841	143.502	125.245	126.118
343.8	145.597	149.502	144.82	125.081	125.951
344	146.586	148.978	142.598	124.81	126.774
344.2	147.595	146.178	142.222	124.205	126.248
344.4	147.021	146.293	141.513	125.779	127.039
344.6	147.027	144.186	143.448	125.814	125.299
344.8	146.82	143.806	143.443	125.941	125.273
345	147.492	142.486	142.624	126.715	126.057
345.2	148.608	142.456	142.745	125.208	127.824
345.4	149.054	141.833	144.583	126.094	127.669
345.6	147.262	143.03	145.025	128.412	126.775
345.8	147.86	142.136	147.405	126.592	124.885
346	149.265	144.597	145.591	126.633	127.262
346.2	150.567	143.76	145.018	125.884	126.684
346.4	149.749	145.696	145.544	126.163	125.98
346.6	149.204	145.551	144.777	126.636	126.265
346.8	148.814	145.645	143.59	127.349	126.687
347	149.859	145.614	142.491	125.37	127.208
347.2	150.555	145.103	143.015	126.413	125.911
347.4	149.847	142.735	142.377	125.68	126.256
347.6	147.398	142.481	143.278	126.36	126.316
347.8	147.697	142.362	142.667	124.794	126.868
348	150.495	143.454	144.406	126.491	126.167
348.2	150.353	143.256	145.021	126.64	125.139
348.4	151.122	142.741	145.698	125.837	125.215
348.6	149.908	142.093	144.592	128.439	125.642
348.8	147.797	142.922	144.516	128.428	124.513
349	150.16	142.527	143.399	128.133	125.185
349.2	149.02	142.497	145.082	129.273	125.413
349.4	148.312	145.597	143.873	129.533	126.06
349.6	148.628	145.422	145.787	129.362	126.663
349.8	150.201	146.313	146.381	128.469	126.743
350	147.949	144.051	146.181	125.617	124.986
350.2	151.283	143.854	143.964	126.505	126.458
350.4	150.692	144.58	145.023	126.349	125.242
350.6	150.551	144.288	145.589	126.07	126.032
350.8	150.645	142.406	146.501	126.601	126.575
351	149.933	141.55	145.095	126.706	126
351.2	151.501	141.159	142.314	127.835	126.681
351.4	150.929	141.61	141.906	127.208	127.994
351.6	149.446	142.914	141.837	127.015	126.979
351.8	151.649	141.34	144.249	129.624	125.194
352	153.513	141.838	140.83	126.436	126.98
352.2	152.418	143.206	141.411	128.217	125.496
352.4	151.148	142.948	141.397	129.478	125.051
352.6	151.968	142.739	140.06	126.543	127.229
352.8	151.435	143.365	139.847	124.728	125.551
353	150.347	142.976	140.963	129.626	123.89
353.2	149.792	142.418	140.67	127.378	124.628
353.4	149.625	147.335	139.839	127.972	124.896
353.6	150.239	145.205	139.839	128.937	123.572
353.8	151.744	143.813	140.092	126.584	124.073
354	150.743	142.309	141.276	127.438	123.643
354.2	152.158	143.298	141.139	126.696	123.841
354.4	150.101	143.176	142.298	126.697	123.78
354.6	151.609	142.483	140.823	125.763	124.272
354.8	151.225	142.181	141.192	125.284	125.155
355	150.765	143.184	140.846	127.99	124.304
355.2	153.197	143.57	140.947	127.442	122.984
355.4	151.904	142.995	141.546	127.137	120.541
355.6	149.103	142.358	139.824	125.621	121.709
355.8	151.382	142.221	141.064	125.28	123.321
356	150.053	141.816	141.215	124.408	122.392
356.2	149.851	143.421	141.601	123.262	122.655
356.4	149.197	143.1	139.697	125.127	123.564
356.6	150.192	143.222	140.989	126.405	125.424
356.8	148.579	142.38	142.294	123.469	125.595
357	148.227	142.083	141.37	122.601	126.156
357.2	148.307	142.456	139.738	123.921	125.52
357.4	148.495	142.928	140.655	123.527	125.662
357.6	148.728	142.192	141.593	123.794	125.194
357.8	149.277	141.583	140.192	122.708	126.516
358	146.937	141.432	141.376	123.613	125.733
358.2	147.978	141.321	140.972	119.746	125.765
358.4	148.866	140.194	140.502	120.527	125.866
358.6	146.396	139.803	141.074	122.489	125.567
358.8	147.649	139.415	139.432	123.757	126.857
359	146.776	139.884	137.381	122.726	127.278
359.2	145.243	141.05	138.047	120.028	127.342
359.4	144.741	140.898	137.94	119.501	126.618
359.6	144.119	140.262	137.047	120.054	126.19
359.8	143.745	140.629	138.547	120.351	128.669
360	144.15	139.93	139.135	121.626	127.592
360.2	146.173	141.834	138.73	121.19	127.958
360.4	148.071	140.818	139.526	121.757	129.028
360.6	148.477	140.143	140.218	122.15	125.692
360.8	150.753	140.48	140.54	120.646	127.506
361	148.682	138.762	138.63	120.159	126.998
361.2	149.883	138.977	138.189	119.692	125.845
361.4	149.501	138.969	138.324	119.115	126.462
361.6	150.435	142.192	140.465	120.262	126.94
361.8	149.821	142.388	140.783	120.827	126.108
362	147.379	140.291	140.726	120.809	127.271
362.2	145.504	138.786	140.04	118.693	124.761
362.4	146.724	139.439	140.938	122.544	124.025
362.6	146.739	140.5	141.413	120.504	123.654
362.8	145.77	138.16	143.106	121.081	125.079
363	144.996	139.006	142.409	121.67	127.729
363.2	140.602	139.205	143.313	121.516	125.301
363.4	140.979	141.916	141.42	122.85	126.647
363.6	141.433	140.649	141.534	122.732	124.991
363.8	142.962	142.525	142.235	124.169	126.19
364	142.67	143.421	141.735	122.646	127.491
364.2	144.273	141.327	139.857	120.267	129.51
364.4	142.225	140.555	139.888	121.631	127.17
364.6	143.105	139.963	141.368	121.037	128.571
364.8	142.767	140.605	141.294	122.589	128.41
365	144.618	142.212	142.24	122.299	129.004
365.2	144.969	141.511	142.04	122.466	128.628
365.4	144.259	141.335	140.673	122.347	128.675
365.6	144.242	140.569	141.398	122.853	126.815
365.8	144.11	141.026	141.489	123.94	127.808
366	144.699	141.393	140.671	122.746	127.319
366.2	143.697	141.491	141.009	123.92	127.81
366.4	145.03	141.315	140.655	123.52	128.307
366.6	143.258	140.885	142.403	122.752	126.824
366.8	143.776	141.844	141.519	121.625	127.673
367	144.372	140.111	141.333	122.196	127.702
367.2	145.061	141.129	142.072	122.63	127.671
367.4	146.445	141.925	140.271	122.313	126.819
367.6	147.302	141.157	141.861	121.292	128.933
367.8	146.611	141.325	141.793	120.746	128.184
368	144.014	140.546	140.705	121.209	126.779
368.2	145.87	140.248	141.374	120.84	127.489
368.4	145.507	140.173	139.978	121.835	125.344
368.6	145.709	141.412	140.029	120.149	124.821
368.8	145.681	141.246	141.652	122.577	123.966
369	145.66	141.69	144.785	123.418	126.239
369.2	145.065	143.24	142.56	122.184	125.706
369.4	144.477	142.595	142.081	121.726	124.648
369.6	145.094	141.334	140.43	120.87	124.833
369.8	145.8	144.319	140.1	121.877	125.755
370	143.979	142.424	139.278	123.52	124.82
370.2	143.101	143.831	138.503	124.186	125.223
370.4	142.879	143.926	138.527	123.229	124.908
370.6	143.04	143.122	138.994	124.217	125.627
370.8	142.735	142.908	139.029	122.411	125.308
371	145.13	142.496	139.199	123.835	125.601
371.2	147.093	141.557	139.476	123.983	127.284
371.4	146.413	141.25	138.032	126.695	124.945
371.6	144.709	141.743	137.95	126.342	124.363
371.8	143.984	142.037	139.412	126.068	125.702
372	142.644	142.561	140.051	127.232	127.2
372.2	142.401	141.322	140.357	126.651	126.253
372.4	142.139	142.037	141.393	124.841	127.343
372.6	144.296	142.739	142.182	126.967	126.59
372.8	146.366	142.531	143.829	126.621	127.455
373	145.286	143.421	143.403	125.295	125.985
373.2	146.931	143.341	141.917	126.044	126.61
373.4	146.896	141.221	142.605	126.32	125.922
373.6	144.289	141.253	141.425	125.95	126.342
373.8	145.388	143.75	142.076	125.595	126.793
374	145.432	141.344	142.245	125.963	127.337
374.2	146.596	141.409	143.1	124.317	127.321
374.4	146.115	142.814	142.37	123.162	126.764
374.6	148.215	142.461	140.864	122.781	126.396
374.8	147.989	140.915	142.135	123.863	125.196
375	149.713	139.65	141.892	122.985	123.797
375.2	149.233	140.364	143.676	122.854	124.035
375.4	150.929	140.876	143.648	123.218	125.273
375.6	151.115	138.926	141.221	122.395	124.631
375.8	152.143	137.318	143.464	121.771	125.161
376	151.828	137.605	142.563	123.339	124.362
376.2	150.874	137.912	140.685	123.567	123.568
376.4	149.474	138.057	141.357	123.172	123.342
376.6	151.783	138.378	141.737	122.747	123.709
376.8	152.847	139.741	139.939	122.806	123.194
377	153.448	139.083	140.783	124.346	123.801
377.2	154.13	139.643	140.644	122.745	125.417
377.4	153.054	141.671	139.98	123.742	125.456
377.6	153.781	141.657	141.28	123.959	125.723
377.8	152.067	140.844	138.303	123.866	123.949
378	150.02	140.86	138.891	124.595	124.642
378.2	149.024	139.085	137.209	123.384	123.902
378.4	150.595	141.843	138.778	123.023	124.787
378.6	152.17	142.053	137.804	123.171	124.663
378.8	152.183	139.808	138.139	124.052	125.658
379	151.681	140.089	138.177	121.659	125.013
379.2	153.107	139.69	138.627	120.487	124.261
379.4	152.021	140.853	137.777	121.249	123.768
379.6	152.96	143.369	137.339	122.114	124.53
379.8	153.52	143.36	136.11	122.598	124.723
380	152.615	141.169	138.837	122.226	124.259
380.2	152.377	141.165	137.868	122.71	124.334
380.4	151.356	140.188	137.815	123.58	122.804
380.6	151.522	140.566	137.93	122.135	124.015
380.8	153.654	138.655	136.695	120.589	124.357
381	153.985	138.298	134.485	122.615	125.54
381.2	153.199	138.31	134.332	120.658	125.616
381.4	153.093	139.309	134.284	120.818	126.517
381.6	154.217	139.796	134.161	121.835	125.694
381.8	154.504	137.599	134.585	121.503	125.808
382	154.788	135.069	134.739	120.865	125.852
382.2	158.114	137.956	136.245	120.961	124.437
382.4	156.897	136.829	133.919	120.445	124.715
382.6	157.43	135.427	134.042	121.361	125.897
382.8	156.95	137.019	131.982	121.063	124.966
383	157.482	134.744	131.218	122.163	124.116
383.2	158.859	134.354	132.253	123.309	122.188
383.4	158.019	134.041	131.772	123.166	122.8
383.6	156.442	136.034	133.834	122.382	121.268
383.8	155.199	134.88	132.664	122.707	121.251
384	156.383	137.529	133.298	123.715	123.054
384.2	156.023	138.791	132.482	122.51	122.381
384.4	157.672	140.292	132.062	124.686	121.796
384.6	158.529	142.136	133.105	124.505	123.734
384.8	160.287	139.451	130.663	124.185	120.722
385	163.087	138.574	132.075	123.912	120.885
385.2	162.674	139.113	131.154	124.077	118.618
385.4	162.259	138.713	131.251	125.543	120.285
385.6	162.461	137.757	132.03	123.966	120.23
385.8	162.024	138.109	130.434	124.564	119.782
386	162.438	136.077	132.036	124.662	119.963
386.2	161.472	138.219	131.689	124.48	121.988
386.4	160.239	140.035	132.39	123.612	121.1
386.6	159.772	139.189	133.345	123.63	119.984
386.8	159.169	139.931	132.059	122.487	118.979
387	161.461	138.074	131.196	123.295	117.85
387.2	159.599	139.344	130.706	122.339	119.02
387.4	158.044	140.108	130.482	123.109	118.2
387.6	158.514	140.416	128.676	121.651	119.31
387.8	159.647	141.025	128.676	120.494	119.766
388	156.56	141.315	128.384	119.471	121.256
388.2	156.075	139.063	127.817	120.708	119.483
388.4	155.799	140.104	129.948	120.897	120.208
388.6	159.007	139.777	130.982	122.437	120.518
388.8	159.414	140.992	130.293	121.86	121.083
389	154.986	138.834	131.044	122.379	122.259
389.2	154.705	139.486	132.071	121.774	124.006
389.4	154.515	138	131.516	122.294	124.227
389.6	153.928	139.842	131.674	123.012	123.164
389.8	152.171	141.221	131.312	121.374	122.535
390	151.614	141.096	132.356	121.308	122.974
390.2	151.237	139.812	132.685	122.131	121.487
390.4	151.429	141.059	133.457	123.092	121.587
390.6	150.802	138.138	133.435	123.863	120.723
390.8	151.185	139.592	134.949	122.623	120.554
391	150.056	139.348	137.151	124.59	120.852
391.2	149.555	140.336	136.17	122.652	119.39
391.4	148.459	138.907	133.834	123.088	120.784
391.6	149.421	139.613	133.435	124.196	120.764
391.8	150.846	138.002	134.848	124.247	121.563
392	150.937	137.289	134.818	122.135	120.649
392.2	150.355	136.718	134.308	122.647	120.159
392.4	150.179	136.769	135.211	123.848	120.288
392.6	149.94	136.273	135.238	124.788	121.144
392.8	150.886	138.765	133.122	123.097	121.394
393	150.084	138.508	132.227	122.203	122.64
393.2	151.924	137.018	133.518	120.716	124.046
393.4	151.092	137.415	134.336	120.942	123.19
393.6	149.56	137.984	135.217	120.89	122.56
393.8	150.373	138.939	133.146	120.356	124.169
394	148.267	138.185	133.379	119.622	122.792
394.2	149.142	137.186	134.136	121.393	122.087
394.4	148.859	137.318	133.199	122.166	122.374
394.6	148.831	138.794	133.105	121.73	121.857
394.8	148.104	137.623	134.507	121.437	121.92
395	147.805	139.395	135.506	122.108	122.069
395.2	150.99	136.744	134.757	122.644	122.403
395.4	150.009	138.485	135.679	121.676	120.711
395.6	151.521	139.526	134.397	122.865	121.023
395.8	149.59	137.709	136.737	122.777	121.589
396	150.098	137.583	136.131	123.264	122.066
396.2	149.07	137.721	135.781	124.092	122.126
396.4	149.732	137.649	137.131	125.3	121.624
396.6	149.066	136.443	136.478	125.565	122.73
396.8	148.485	137.888	135.022	124.885	123.175
397	149.966	135.898	136.28	124.55	122.157
397.2	150.069	135.978	135.956	125.2	124.521
397.4	148.7	135.669	136.784	125.2	124.988
397.6	148.163	135.122	138.673	125.705	124.372
397.8	147.941	135.826	140.509	125.338	123.863
398	145.365	135.145	139.962	126.677	123.278
398.2	145.789	134.358	139.607	125.244	122.111
398.4	146.114	136.776	139.011	124.295	122.982
398.6	146.433	136.537	137.903	124.372	120.984
398.8	144.973	134.033	137.688	124.483	123.524
399	144.059	137.524	139.656	123.425	121.443
399.2	146.684	137.222	139.987	122.388	120.905
[truncated: 5,503 more rows]
