# Supplementary material for: Direct and indirect salt effects on homotypic phase separation
Source: eLife. 2024 Nov 12;13:RP100282. doi: 10.7554/eLife.100282 (PMC11556789; doi:10.7554/eLife.100282)
Supplement: Figure 3—figure supplement 1—source data 1. [file elife-100282-fig3-figsupp1-data1.xlsx]

## Sheet: Supplementary Figure 2
A								B
	g(r)								g(r)
Distance (Å)	Arg NH1/NH2/NE	Lys NZ	Gln NE2	Asn ND2	Ser OG			Distance (Å)	Tyr OG	BB N	BB O	Asn OD1	Gln OE1	Asp OD1	Asp OD2
0.025	0	0	0	0	0			0.025	0	0	0	0	0	0	0
0.075	0	0	0	0	0			0.075	0	0	0	0	0	0	0
0.125	0	0	0	0	0			0.125	0	0	0	0	0	0	0
0.175	0	0	0	0	0			0.175	0	0	0	0	0	0	0
0.225	0	0	0	0	0			0.225	0	0	0	0	0	0	0
0.275	0	0	0	0	0			0.275	0	0	0	0	0	0	0
0.325	0	0	0	0	0			0.325	0	0	0	0	0	0	0
0.375	0	0	0	0	0			0.375	0	0	0	0	0	0	0
0.425	0	0	0	0	0			0.425	0	0	0	0	0	0	0
0.475	0	0	0	0	0			0.475	0	0	0	0	0	0	0
0.525	0	0	0	0	0			0.525	0	0	0	0	0	0	0
0.575	0	0	0	0	0			0.575	0	0	0	0	0	0	0
0.625	0	0	0	0	0			0.625	0	0	0	0	0	0	0
0.675	0	0	0	0	0			0.675	0	0	0	0	0	0	0
0.725	0	0	0	0	0			0.725	0	0	0	0	0	0	0
0.775	0	0	0	0	0			0.775	0	0	0	0	0	0	0
0.825	0	0	0	0	0			0.825	0	0	0	0	0	0	0
0.875	0	0	0	0	0			0.875	0	0	0	0	0	0	0
0.925	0	0	0	0	0			0.925	0	0	0	0	0	0	0
0.975	0	0	0	0	0			0.975	0	0	0	0	0	0	0
1.025	0	0	0	0	0			1.025	0	0	0	0	0	0	0
1.075	0	0	0	0	0			1.075	0	0	0	0	0	0	0
1.125	0	0	0	0	0			1.125	0	0	0	0	0	0	0
1.175	0	0	0	0	0			1.175	0	0	0	0	0	0	0
1.225	0	0	0	0	0			1.225	0	0	0	0	0	0	0
1.275	0	0	0	0	0			1.275	0	0	0	0	0	0	0
1.325	0	0	0	0	0			1.325	0	0	0	0	0	0	0
1.375	0	0	0	0	0			1.375	0	0	0	0	0	0	0
1.425	0	0	0	0	0			1.425	0	0	0	0	0	0	0
1.475	0	0	0	0	0			1.475	0	0	0	0	0	0	0
1.525	0	0	0	0	0			1.525	0	0	0	0	0	0	0
1.575	0	0	0	0	0			1.575	0	0	0	0	0	0	0
1.625	0	0	0	0	0			1.625	0	0	0	0	0	0	0
1.675	0	0	0	0	0			1.675	0	0	0	0	0	0	0
1.725	0	0	0	0	0			1.725	0	0	0	0	0	0	0
1.775	0	0	0	0	0			1.775	0	0	0	0	0	0	0
1.825	0	0	0	0	0			1.825	0	0	0	0	0	0	0
1.875	0	0	0	0	0			1.875	0	0	0	0	0	0	0
1.925	0	0	0	0	0			1.925	0	0	0	0	0	0	0
1.975	0	0	0	0	0			1.975	0	0	0	0	0	0	0
2.025	0	0	0	0	0			2.025	0	0	0	0	0	0	0
2.075	0	0	0	0	0			2.075	0	0	0	0	0	0	0
2.125	0	0	0	0	0			2.125	0	0	0	0	0	0	0
2.175	0	0	0	0	0			2.175	0	0	0	0	0	0	0
2.225	0	0	0	0	0			2.225	0	0	0	0	0	0	0
2.275	0	0	0	0	0			2.275	0	0	0	0	0	0	0
2.325	0	0	0	0	0			2.325	0	0	0	0	0	0	0
2.375	0	0	0	0	0			2.375	0	0	0	0	0	0	0
2.425	0	0	0	0	0			2.425	0	0	0	0	0	0	0
2.475	0	0	0	0	0			2.475	0	0	0	0	0	0	0
2.525	0	0	0	0	0			2.525	0	0	0	0	0	0	0
2.575	0	0	0	0	0			2.575	0	0	0	0	0	0	0
2.625	0	0	0	0	0			2.625	0	0	0	0	0	0	0
2.675	0	0	0	0	0			2.675	0	0	0	0	0	0	0
2.725	0	0	0	0	0.000168			2.725	0.000529	0	0	0	0	0	0
2.775	0	0	0	0	0.001946			2.775	0.001019	0	0	0	0	0	0
2.825	0	0	0	0	0.022062			2.825	0.009343	0	0	0	0	0	0
2.875	0.000111	0.003324	0	0	0.116779			2.875	0.044631	0.000101	0	0	0	0	0
2.925	0.003425	0.03532	0	0.000247	0.337588			2.925	0.138988	0.00027	0	0	0	0	0
2.975	0.038385	0.221931	0.00388	0.00573	0.689919			2.975	0.340989	0.002227	2.4e-05	0	0	0	0.001035
3.025	0.216056	0.920166	0.051037	0.039721	1.04012			3.025	0.510798	0.009098	6.9e-05	0	0	0.001001	0
3.075	0.744541	2.39255	0.154709	0.137668	1.19766			3.075	0.701431	0.026747	0.000222	0.001117	0	0	0
3.125	1.53849	4.08464	0.367814	0.351639	1.20989			3.125	0.733419	0.059741	0.000558	0.001298	0	0.000938	0.002813
3.175	2.29208	5.19289	0.619304	0.609818	1.04821			3.175	0.652104	0.109549	0.001581	0.002725	0.004769	0.003634	0.004542
3.225	2.76612	5.41876	0.83335	0.815978	0.839834			3.225	0.555441	0.168624	0.003105	0.005689	0.006603	0.002641	0.006163
3.275	2.80022	4.94593	0.970744	0.897844	0.645338			3.275	0.442012	0.212219	0.005338	0.010048	0.008324	0.011953	0.014514
3.325	2.54832	3.97332	1.00575	0.898952	0.480937			3.325	0.341848	0.232516	0.008175	0.023702	0.016773	0.010768	0.010768
3.375	2.13814	3.22216	0.851968	0.814446	0.360673			3.375	0.265642	0.2333	0.012924	0.023747	0.023515	0.016079	0.028942
3.425	1.74612	2.40044	0.803856	0.726888	0.276237			3.425	0.202741	0.218333	0.016143	0.034408	0.036885	0.019516	0.023419
3.475	1.41292	1.89052	0.665434	0.614072	0.228636			3.475	0.161524	0.197611	0.021065	0.04935	0.043225	0.029575	0.032608
3.525	1.14783	1.45809	0.552727	0.507829	0.190741			3.525	0.131075	0.173632	0.023341	0.057654	0.048087	0.03169	0.040533
3.575	0.961757	1.26928	0.479876	0.440813	0.174696			3.575	0.119758	0.151696	0.028272	0.06713	0.066097	0.039407	0.045139
3.625	0.814433	0.90628	0.421781	0.382421	0.159837			3.625	0.098259	0.133719	0.030641	0.089575	0.08467	0.048781	0.050175
3.675	0.710719	0.862464	0.373768	0.340323	0.161435			3.675	0.112748	0.117652	0.035636	0.092943	0.090518	0.050853	0.042716
3.725	0.648936	0.752352	0.360832	0.315714	0.15929			3.725	0.099559	0.108258	0.038162	0.099755	0.109883	0.053457	0.054117
3.775	0.602044	0.734482	0.305552	0.279972	0.166752			3.775	0.098041	0.100171	0.040601	0.111069	0.114703	0.068115	0.060404
3.825	0.570572	0.68724	0.288697	0.265912	0.169762			3.825	0.104615	0.093842	0.044922	0.126384	0.124398	0.074482	0.074482
3.875	0.565944	0.666875	0.298676	0.249243	0.186698			3.875	0.10141	0.087763	0.048574	0.147632	0.159629	0.08416	0.078671
3.925	0.551439	0.668717	0.283982	0.249517	0.194374			3.925	0.100881	0.088305	0.056451	0.159532	0.180554	0.080246	0.079652
3.975	0.536495	0.670256	0.282968	0.251438	0.210616			3.975	0.118229	0.085832	0.059778	0.175472	0.204293	0.099104	0.100843
4.025	0.541676	0.673208	0.264111	0.244186	0.224069			4.025	0.123789	0.086651	0.06748	0.195793	0.226381	0.120397	0.111919
4.075	0.552563	0.705594	0.280418	0.255029	0.235073			4.075	0.13495	0.090056	0.077465	0.21367	0.235749	0.141725	0.130145
4.125	0.572778	0.716039	0.266799	0.244289	0.252599			4.125	0.12847	0.088022	0.08674	0.237955	0.256709	0.16791	0.152303
4.175	0.587247	0.702144	0.287241	0.245262	0.287061			4.175	0.13937	0.093277	0.098704	0.25387	0.286058	0.17442	0.19701
4.225	0.594309	0.779502	0.293564	0.244582	0.288212			4.225	0.158737	0.094654	0.110361	0.255592	0.295103	0.2052	0.226233
4.275	0.613509	0.789184	0.29538	0.257049	0.319637			4.275	0.164494	0.100336	0.12417	0.276706	0.31868	0.269575	0.268072
4.325	0.638228	0.807025	0.272802	0.250801	0.333585			4.325	0.18547	0.10396	0.140688	0.286952	0.329346	0.322614	0.320656
4.375	0.654247	0.909248	0.299255	0.247199	0.351838			4.375	0.180435	0.109793	0.153114	0.281645	0.34949	0.376042	0.363603
4.425	0.661012	0.907757	0.311121	0.258696	0.363511			4.425	0.201234	0.115808	0.169455	0.300679	0.373906	0.419037	0.404071
4.475	0.64646	0.954806	0.315525	0.27057	0.37545			4.475	0.201662	0.123382	0.183953	0.301279	0.361482	0.454996	0.424358
4.525	0.648443	0.996882	0.307249	0.265966	0.392569			4.525	0.20528	0.129715	0.195232	0.295586	0.383726	0.483011	0.469147
4.575	0.628615	1.06906	0.323867	0.27543	0.406825			4.575	0.217693	0.141503	0.206599	0.319955	0.370462	0.489137	0.481699
4.625	0.619378	1.06662	0.324287	0.279584	0.412729			4.625	0.22824	0.151342	0.218665	0.30359	0.37887	0.49617	0.496598
4.675	0.606661	1.14762	0.32713	0.277986	0.426117			4.675	0.228771	0.163129	0.225115	0.308541	0.395949	0.500279	0.503631
4.725	0.603939	1.18068	0.328856	0.277814	0.44377			4.725	0.248565	0.177815	0.230239	0.305737	0.376847	0.492208	0.49754
4.775	0.608828	1.2332	0.338573	0.282314	0.445588			4.775	0.254747	0.191742	0.233711	0.309563	0.38978	0.477135	0.455045
4.825	0.637381	1.31634	0.346343	0.29492	0.454424			4.825	0.244943	0.210021	0.238098	0.29964	0.360503	0.496405	0.475557
4.875	0.699318	1.27791	0.345921	0.30384	0.455501			4.875	0.261412	0.221724	0.239708	0.293792	0.365573	0.457375	0.430403
4.925	0.786446	1.34384	0.358754	0.303714	0.460921			4.925	0.269076	0.236888	0.236707	0.29927	0.364134	0.408494	0.410382
4.975	0.91553	1.39966	0.353244	0.301909	0.45145			4.975	0.266548	0.249054	0.236904	0.304299	0.360736	0.374796	0.381086
5.025	1.03278	1.38609	0.376441	0.300868	0.456655			5.025	0.283185	0.258499	0.238076	0.302375	0.361753	0.387321	0.373177
5.075	1.09694	1.41011	0.373326	0.31023	0.440913			5.075	0.27489	0.264895	0.242748	0.327379	0.375726	0.365149	0.32995
5.125	1.11779	1.39789	0.370523	0.310402	0.445141			5.125	0.27284	0.266714	0.24918	0.356101	0.409223	0.339232	0.294605
5.175	1.10946	1.37153	0.376733	0.32487	0.440777			5.175	0.262024	0.275382	0.250081	0.386735	0.440334	0.322108	0.287572
5.225	1.08591	1.3932	0.377608	0.320385	0.42392			5.225	0.274859	0.273824	0.264453	0.410332	0.453331	0.323353	0.281759
5.275	1.08474	1.34075	0.383318	0.315707	0.419602			5.275	0.270379	0.276134	0.267294	0.424386	0.471435	0.286645	0.275456
5.325	1.06344	1.26531	0.355566	0.324414	0.401278			5.325	0.265463	0.275322	0.269035	0.418243	0.472554	0.260942	0.261911
5.375	1.04336	1.317	0.387493	0.326013	0.397737			5.375	0.278071	0.27656	0.26859	0.395137	0.439555	0.270373	0.236458
5.425	1.00216	1.24756	0.392985	0.330874	0.388954			5.425	0.264435	0.275697	0.264125	0.375967	0.428456	0.2567	0.250788
5.475	0.956901	1.20105	0.378508	0.331274	0.380299			5.475	0.252426	0.278646	0.257399	0.356019	0.398442	0.261198	0.249284
5.525	0.913531	1.21226	0.401162	0.330982	0.368661			5.525	0.256492	0.277157	0.248179	0.334513	0.377313	0.248992	0.246292
5.575	0.856323	1.16763	0.382066	0.330783	0.361194			5.575	0.247492	0.277849	0.245981	0.309705	0.362399	0.259572	0.255742
5.625	0.816307	1.12483	0.401135	0.343162	0.356025			5.625	0.250554	0.280209	0.239798	0.306628	0.337969	0.268581	0.251505
5.675	0.782793	1.04581	0.401348	0.330514	0.353075			5.675	0.25213	0.281648	0.2372	0.292981	0.342063	0.261594	0.250221
5.725	0.749594	1.036	0.401703	0.351266	0.349449			5.725	0.253732	0.286354	0.236427	0.298718	0.342401	0.25928	0.257883
5.775	0.732386	0.97819	0.407545	0.347238	0.353159			5.775	0.246886	0.287831	0.241475	0.286534	0.336497	0.285563	0.269363
5.825	0.726453	0.943252	0.411914	0.348465	0.341234			5.825	0.248102	0.29445	0.242508	0.291041	0.33783	0.270966	0.276633
5.875	0.703926	0.912142	0.417468	0.349599	0.353251			5.875	0.251061	0.293646	0.247834	0.298476	0.350013	0.298741	0.294762
5.925	0.67947	0.861597	0.427864	0.357991	0.341231			5.925	0.263052	0.297432	0.257342	0.308208	0.367998	0.324501	0.303111
5.975	0.676354	0.81261	0.43747	0.362206	0.346213			5.975	0.25537	0.300658	0.261289	0.3142	0.368791	0.327301	0.328071
6.025	0.673172	0.816206	0.444429	0.360585	0.355936			6.025	0.2465	0.303765	0.27128	0.32257	0.363452	0.348379	0.329964
6.075	0.668116	0.798732	0.444216	0.355476	0.35027			6.075	0.2616	0.308832	0.277993	0.324497	0.384292	0.350608	0.359541
6.125	0.655398	0.743638	0.441753	0.360004	0.356058			6.125	0.259648	0.30888	0.284329	0.340288	0.40825	0.378837	0.358577
6.175	0.653208	0.702825	0.465788	0.364672	0.368982			6.175	0.269047	0.312736	0.296193	0.340786	0.424541	0.396262	0.378971
6.225	0.655211	0.693707	0.447524	0.380379	0.367268			6.225	0.264641	0.31617	0.303236	0.345367	0.421471	0.392994	0.387323
6.275	0.660695	0.696301	0.460131	0.371497	0.373585			6.275	0.275191	0.317452	0.311029	0.347453	0.417571	0.408618	0.39792
6.325	0.656151	0.667138	0.453228	0.370982	0.388085			6.325	0.278215	0.321668	0.316458	0.358462	0.430223	0.402412	0.410194
6.375	0.661334	0.671586	0.455441	0.376885	0.394649			6.375	0.280532	0.325688	0.323294	0.362117	0.441922	0.402659	0.4315
6.425	0.660553	0.651192	0.461524	0.373806	0.401901			6.425	0.289683	0.328005	0.332857	0.366844	0.43324	0.422592	0.449878
6.475	0.658057	0.621516	0.466874	0.377481	0.406024			6.475	0.289345	0.331452	0.336604	0.37234	0.433619	0.427667	0.44252
6.525	0.65713	0.686554	0.450551	0.369683	0.406424			6.525	0.295067	0.334219	0.342464	0.37008	0.438937	0.446518	0.438345
6.575	0.66751	0.6806	0.463584	0.37904	0.412283			6.575	0.312566	0.337703	0.346575	0.377476	0.452622	0.423654	0.456064
6.625	0.6765	0.680068	0.470696	0.377192	0.417862			6.625	0.29803	0.341292	0.351598	0.379648	0.453483	0.45004	0.455256
6.675	0.67779	0.70568	0.456272	0.377728	0.43088			6.675	0.315426	0.344035	0.359953	0.376922	0.463979	0.438391	0.445379
6.725	0.681355	0.714664	0.473355	0.382973	0.434326			6.725	0.314051	0.348569	0.364516	0.379282	0.463028	0.454169	0.447082
6.775	0.686398	0.694279	0.463102	0.373014	0.439338			6.775	0.315674	0.352156	0.369897	0.389266	0.458763	0.45587	0.45986
6.825	0.671994	0.729261	0.463714	0.38077	0.445819			6.825	0.340724	0.359063	0.373879	0.376687	0.475362	0.441744	0.4616
6.875	0.690464	0.76955	0.461207	0.378382	0.451036			6.875	0.343093	0.361916	0.378164	0.38795	0.459899	0.44348	0.450454
6.925	0.695424	0.751031	0.443543	0.37849	0.460404			6.925	0.333655	0.365459	0.385051	0.388713	0.490805	0.439963	0.457722
6.975	0.698045	0.74736	0.483653	0.385332	0.470947			6.975	0.344458	0.365463	0.386456	0.394975	0.465583	0.449113	0.437631
7.025	0.696271	0.759862	0.475261	0.382821	0.469859			7.025	0.342276	0.372373	0.392044	0.395239	0.483751	0.429011	0.444598
7.075	0.697752	0.783736	0.470763	0.382833	0.471699			7.075	0.352901	0.375927	0.39439	0.39001	0.482563	0.432482	0.446752
7.125	0.706176	0.766281	0.46012	0.387844	0.46916			7.125	0.34897	0.381327	0.396698	0.398335	0.477437	0.448982	0.44339
7.175	0.699766	0.770314	0.466938	0.385865	0.477999			7.175	0.35007	0.384239	0.404004	0.395183	0.474542	0.432962	0.440078
7.225	0.711166	0.769951	0.480233	0.390137	0.48784			7.225	0.366443	0.391578	0.407198	0.395845	0.477733	0.419272	0.413483
7.275	0.701216	0.785877	0.48157	0.385831	0.496069			7.275	0.35994	0.396085	0.406664	0.391022	0.48741	0.430658	0.435156
7.325	0.707565	0.773393	0.486667	0.39224	0.491368			7.325	0.362943	0.399744	0.407999	0.393461	0.480394	0.427359	0.424628
7.375	0.704216	0.757386	0.477691	0.396109	0.495128			7.375	0.371604	0.403553	0.411195	0.389892	0.472766	0.416869	0.42815
7.425	0.692522	0.760674	0.474144	0.387342	0.495617			7.425	0.362344	0.408734	0.410541	0.39382	0.48436	0.398318	0.417752
7.475	0.699874	0.754219	0.489702	0.387964	0.500519			7.475	0.368189	0.411823	0.408971	0.390536	0.471633	0.411363	0.406118
7.525	0.698738	0.758542	0.480305	0.394693	0.505908			7.525	0.369481	0.416042	0.412864	0.392753	0.472057	0.407046	0.395564
7.575	0.694412	0.765797	0.483082	0.396461	0.5038			7.575	0.367766	0.422237	0.415049	0.393883	0.472309	0.386529	0.397062
7.625	0.690501	0.714206	0.494723	0.400547	0.502627			7.625	0.372274	0.430197	0.416386	0.384445	0.480075	0.393447	0.404
7.675	0.684907	0.746438	0.492029	0.394735	0.509306			7.675	0.35578	0.431595	0.416451	0.391614	0.466378	0.393468	0.38585
7.725	0.678847	0.736577	0.496729	0.405259	0.503864			7.725	0.357305	0.434271	0.419908	0.390669	0.47233	0.386856	0.383173
7.775	0.680279	0.735541	0.494337	0.403279	0.503023			7.775	0.36058	0.436884	0.420658	0.389086	0.464343	0.384623	0.396894
7.825	0.680167	0.711814	0.501051	0.398763	0.507588			7.825	0.373036	0.438192	0.422273	0.389997	0.464709	0.382266	0.389893
7.875	0.666862	0.724288	0.503901	0.403802	0.500297			7.875	0.369897	0.440251	0.423295	0.390001	0.472338	0.390569	0.390274
7.925	0.660151	0.704461	0.505655	0.40054	0.502792			7.925	0.365244	0.443645	0.425057	0.396334	0.48105	0.403153	0.40709
7.975	0.661748	0.673626	0.504626	0.402677	0.499648			7.975	0.364751	0.444849	0.424871	0.396264	0.472229	0.404449	0.407761
8.025	0.659428	0.687867	0.504969	0.405714	0.506414			8.025	0.367838	0.446992	0.428522	0.38934	0.46711	0.399141	0.394733
8.075	0.652495	0.671581	0.493047	0.410947	0.497557			8.075	0.368473	0.451396	0.427622	0.393673	0.482936	0.405589	0.402359
8.125	0.651883	0.670415	0.515816	0.413171	0.495784			8.125	0.375544	0.45256	0.42903	0.392204	0.476282	0.412542	0.414068
8.175	0.644001	0.660595	0.501921	0.417935	0.499155			8.175	0.374371	0.456957	0.432474	0.396623	0.484245	0.408333	0.433683
8.225	0.644155	0.642639	0.501522	0.409527	0.497184			8.225	0.374126	0.455556	0.433336	0.404154	0.492487	0.421793	0.412318
8.275	0.641168	0.647333	0.492571	0.412617	0.505583			8.275	0.373917	0.458095	0.436559	0.406476	0.483344	0.414839	0.423933
8.325	0.633305	0.654446	0.513131	0.414536	0.500393			8.325	0.370118	0.460292	0.438463	0.408346	0.487366	0.427444	0.422952
8.375	0.633938	0.646851	0.490572	0.412584	0.507628			8.375	0.37847	0.463572	0.443232	0.402702	0.489887	0.428492	0.443637
8.425	0.633713	0.6301	0.511473	0.413418	0.508605			8.425	0.375428	0.463582	0.444067	0.40788	0.493088	0.450385	0.43529
8.475	0.629636	0.620584	0.510141	0.416351	0.509246			8.475	0.376312	0.46644	0.447748	0.409437	0.500387	0.450441	0.443174
8.525	0.627199	0.620319	0.496992	0.412005	0.514733			8.525	0.381415	0.468949	0.453592	0.412237	0.497276	0.448071	0.448449
8.575	0.6282	0.62338	0.501394	0.414773	0.511295			8.575	0.380075	0.471103	0.456016	0.412646	0.50429	0.46752	0.461915
8.625	0.624347	0.620605	0.512678	0.425687	0.513391			8.625	0.379902	0.476152	0.459861	0.422477	0.523942	0.448205	0.448574
8.675	0.626736	0.643589	0.503773	0.422535	0.515704			8.675	0.386539	0.47633	0.463863	0.42905	0.51582	0.457898	0.444148
8.725	0.624902	0.646158	0.504512	0.417262	0.519948			8.725	0.37908	0.479079	0.467688	0.423453	0.534194	0.474559	0.464214
8.775	0.627945	0.648448	0.495746	0.418394	0.523137			8.775	0.387871	0.482253	0.473469	0.42885	0.517867	0.457987	0.449662
8.825	0.626706	0.643591	0.518717	0.420884	0.531705			8.825	0.387066	0.483018	0.474173	0.42916	0.537589	0.469391	0.465981
8.875	0.63286	0.633743	0.519255	0.42144	0.526428			8.875	0.391686	0.486023	0.476343	0.431743	0.53277	0.460629	0.475395
8.925	0.630767	0.637699	0.500002	0.424903	0.525375			8.925	0.39337	0.487799	0.480156	0.432411	0.532594	0.472612	0.468589
8.975	0.627362	0.638969	0.504423	0.421546	0.53194			8.975	0.399572	0.487857	0.484753	0.431778	0.525142	0.46918	0.461904
9.025	0.623499	0.655856	0.511666	0.426929	0.541332			9.025	0.402915	0.492332	0.486879	0.435854	0.522712	0.46186	0.46512
9.075	0.632471	0.645981	0.525141	0.429088	0.531153			9.075	0.416262	0.491554	0.490696	0.440687	0.535982	0.469683	0.457785
9.125	0.628044	0.648819	0.513958	0.433206	0.536401			9.125	0.41685	0.491826	0.493773	0.435236	0.52963	0.46279	0.456851
9.175	0.631149	0.65531	0.511635	0.431007	0.53999			9.175	0.416282	0.493149	0.495232	0.440873	0.540435	0.469291	0.455367
9.225	0.63527	0.646612	0.529266	0.436629	0.54504			9.225	0.412612	0.495161	0.496509	0.440155	0.536449	0.469921	0.456039
9.275	0.634241	0.642693	0.530281	0.437559	0.546786			9.275	0.418395	0.49796	0.500342	0.431614	0.540341	0.466145	0.461036
9.325	0.632934	0.665517	0.537484	0.435188	0.546237			9.325	0.426512	0.499597	0.500704	0.446197	0.553992	0.460528	0.456842
9.375	0.638099	0.642496	0.523014	0.436594	0.546308			9.375	0.421975	0.499021	0.500925	0.442244	0.538252	0.462609	0.454899
9.425	0.635728	0.641264	0.531938	0.439848	0.548751			9.425	0.426169	0.500643	0.50404	0.44344	0.54686	0.454828	0.460601
9.475	0.636493	0.655781	0.531617	0.435807	0.551334			9.475	0.430951	0.503477	0.504142	0.445199	0.533454	0.459016	0.465545
9.525	0.637448	0.656788	0.536271	0.446826	0.553104			9.525	0.429596	0.504527	0.507125	0.44869	0.549745	0.474094	0.461881
9.575	0.636642	0.656988	0.536603	0.450516	0.559315			9.575	0.431029	0.505591	0.508048	0.443808	0.55136	0.455272	0.455472
9.625	0.636479	0.64158	0.539419	0.441125	0.553222			9.625	0.429739	0.505079	0.512087	0.444821	0.553283	0.464492	0.461724
9.675	0.635073	0.646559	0.539288	0.450959	0.551001			9.675	0.436001	0.507937	0.509031	0.447053	0.551761	0.453442	0.457942
9.725	0.634699	0.655032	0.546248	0.448792	0.555583			9.725	0.426923	0.508706	0.514385	0.447049	0.557504	0.457796	0.458281
9.775	0.63588	0.63081	0.550665	0.45182	0.558513			9.775	0.427947	0.513497	0.512584	0.449697	0.540171	0.455617	0.446321
9.825	0.632422	0.649166	0.556601	0.448809	0.558211			9.825	0.432831	0.511962	0.51597	0.446752	0.553683	0.470439	0.471862
9.875	0.637913	0.642186	0.555838	0.462848	0.563445			9.875	0.434013	0.51764	0.516532	0.453833	0.540484	0.46287	0.464091
9.925	0.63404	0.64117	0.546068	0.461007	0.569001			9.925	0.437381	0.516323	0.517826	0.459998	0.540979	0.454778	0.471419
9.975	0.635173	0.640419	0.560832	0.456036	0.564779			9.975	0.444169	0.517502	0.51806	0.457671	0.556484	0.474527	0.460262
10.025	0.638083	0.631313	0.558737	0.463084	0.561893			10.025	0.435181	0.51894	0.522302	0.456797	0.555594	0.465705	0.459145
10.075	0.634752	0.648338	0.560242	0.4687	0.571093			10.075	0.440577	0.521302	0.520794	0.459769	0.546777	0.453697	0.445668
10.125	0.631526	0.657092	0.561556	0.463938	0.566684			10.125	0.450171	0.523291	0.524136	0.46029	0.551172	0.46084	0.465485
10.175	0.637868	0.629156	0.563215	0.470739	0.567292			10.175	0.445455	0.525005	0.523474	0.462615	0.53993	0.466405	0.453933
10.225	0.63803	0.640492	0.570924	0.467238	0.568912			10.225	0.448616	0.526922	0.526041	0.457031	0.558443	0.463344	0.467898
10.275	0.634022	0.627898	0.558941	0.471649	0.577168			10.275	0.44545	0.528009	0.526639	0.463042	0.552306	0.46032	0.464657
10.325	0.634012	0.62196	0.558051	0.472563	0.573923			10.325	0.45035	0.530916	0.526152	0.460273	0.56095	0.479323	0.467641
10.375	0.633633	0.622233	0.566212	0.474341	0.579472			10.375	0.442994	0.531736	0.532654	0.465997	0.557087	0.463314	0.480414
10.425	0.635456	0.606799	0.571157	0.476705	0.575501			10.425	0.449913	0.53398	0.532379	0.468188	0.551314	0.46638	0.475733
10.475	0.64017	0.638076	0.584433	0.48035	0.582413			10.475	0.449026	0.533163	0.533981	0.471395	0.564904	0.472704	0.475792
10.525	0.638203	0.63364	0.578956	0.481883	0.573319			10.525	0.461882	0.537794	0.536096	0.474004	0.564572	0.469133	0.46905
10.575	0.637128	0.621275	0.573248	0.476902	0.581936			10.575	0.462157	0.540242	0.538135	0.473557	0.574231	0.469293	0.473797
10.625	0.63946	0.634423	0.589706	0.47366	0.581936			10.625	0.45594	0.540195	0.539972	0.474727	0.562329	0.480704	0.478027
10.675	0.636923	0.621864	0.579434	0.483327	0.590239			10.675	0.465042	0.540202	0.540674	0.481268	0.566054	0.472033	0.475971
10.725	0.643736	0.618468	0.577626	0.487557	0.590317			10.725	0.468188	0.545319	0.543827	0.479014	0.563834	0.473135	0.485475
10.775	0.638975	0.617474	0.581625	0.483735	0.588401			10.775	0.46534	0.543015	0.544381	0.478656	0.568019	0.485397	0.489735
10.825	0.642979	0.625498	0.579605	0.482162	0.589169			10.825	0.466611	0.544085	0.546422	0.47695	0.578316	0.486863	0.490536
10.875	0.642323	0.616391	0.57934	0.487459	0.594228			10.875	0.471191	0.546629	0.549415	0.483814	0.57783	0.48139	0.488049
10.925	0.642572	0.625608	0.591485	0.490054	0.593269			10.925	0.464783	0.54617	0.548985	0.483698	0.560354	0.482134	0.487044
10.975	0.641086	0.632465	0.581147	0.489845	0.599694			10.975	0.480336	0.546778	0.551215	0.488845	0.579607	0.489155	0.48771
11.025	0.643497	0.617249	0.594817	0.48955	0.600934			11.025	0.473793	0.549787	0.551452	0.492227	0.585945	0.485029	0.492789
11.075	0.647943	0.639573	0.591698	0.493358	0.599389			11.075	0.47954	0.552226	0.552838	0.490911	0.576747	0.483422	0.493277
11.125	0.648754	0.647266	0.600098	0.496429	0.603609			11.125	0.474161	0.553671	0.554883	0.493458	0.571796	0.491739	0.489741
11.175	0.649964	0.635218	0.584455	0.496244	0.601239			11.175	0.481367	0.551896	0.554933	0.497073	0.58099	0.482289	0.494388
11.225	0.647479	0.629135	0.595776	0.494768	0.607282			11.225	0.482352	0.555637	0.556574	0.499514	0.588309	0.497043	0.488395
11.275	0.648924	0.628106	0.592395	0.496856	0.605081			11.275	0.485338	0.55458	0.557716	0.499699	0.586938	0.489331	0.488035
11.325	0.652531	0.635317	0.593816	0.50678	0.607636			11.325	0.488253	0.555644	0.559287	0.49991	0.594726	0.49266	0.500657
11.375	0.653701	0.640148	0.59901	0.507953	0.608657			11.375	0.490613	0.558673	0.559067	0.505667	0.596569	0.487489	0.492797
11.425	0.655204	0.636977	0.60325	0.504667	0.610717			11.425	0.486599	0.558823	0.560841	0.503242	0.590096	0.486038	0.495228
11.475	0.656009	0.62591	0.592684	0.50872	0.609797			11.475	0.493962	0.558017	0.562683	0.513246	0.601708	0.495512	0.49113
11.525	0.653521	0.638588	0.594171	0.509327	0.615536			11.525	0.495329	0.562265	0.563693	0.505668	0.592258	0.489843	0.499908
11.575	0.655413	0.646104	0.602326	0.504574	0.611795			11.575	0.494749	0.561616	0.563526	0.50511	0.600224	0.497786	0.502912
11.625	0.657512	0.629987	0.600561	0.511392	0.612079			11.625	0.500696	0.562764	0.563695	0.509125	0.610725	0.498528	0.487957
11.675	0.658852	0.626416	0.601978	0.510107	0.617255			11.675	0.507185	0.563168	0.566957	0.512479	0.603036	0.489564	0.493393
11.725	0.659746	0.647663	0.601102	0.513697	0.618333			11.725	0.503468	0.565601	0.567662	0.517586	0.610993	0.496921	0.494723
11.775	0.655727	0.643561	0.599079	0.512026	0.619802			11.775	0.505853	0.565448	0.568821	0.509984	0.604973	0.495154	0.506382
11.825	0.659061	0.640488	0.603012	0.514219	0.617564			11.825	0.512082	0.56517	0.570301	0.518284	0.605025	0.498376	0.492678
11.875	0.659737	0.639976	0.611728	0.512401	0.618095			11.875	0.507918	0.568838	0.57183	0.514768	0.599357	0.51302	0.492629
11.925	0.661165	0.638388	0.602455	0.521755	0.625172			11.925	0.500797	0.56853	0.571493	0.517638	0.608058	0.491984	0.499905
11.975	0.661166	0.63757	0.603469	0.517746	0.621556			11.975	0.5053	0.569674	0.571472	0.515904	0.601362	0.513683	0.509852
12.025	0.657339	0.62468	0.613328	0.518433	0.626217			12.025	0.511121	0.57186	0.573252	0.51814	0.612235	0.495488	0.496945
12.075	0.66225	0.638265	0.605433	0.521888	0.62433			12.075	0.516964	0.571801	0.573238	0.521902	0.612546	0.49692	0.499432
12.125	0.664106	0.642448	0.604374	0.526763	0.627023			12.125	0.5102	0.573355	0.574817	0.521862	0.608906	0.505911	0.498125
12.175	0.664908	0.632549	0.608455	0.523144	0.62693			12.175	0.513299	0.573472	0.574294	0.530258	0.607019	0.50337	0.49676
12.225	0.666803	0.635841	0.618838	0.528348	0.627953			12.225	0.519718	0.577182	0.576096	0.525746	0.611668	0.507411	0.495646
12.275	0.665618	0.645623	0.616313	0.532229	0.626893			12.275	0.517993	0.576763	0.577792	0.524627	0.611254	0.498363	0.505048
12.325	0.663393	0.638044	0.612363	0.52689	0.625614			12.325	0.529481	0.577442	0.578083	0.529672	0.612905	0.511146	0.506022
12.375	0.661948	0.646981	0.624512	0.53299	0.631512			12.375	0.513833	0.578818	0.578346	0.527443	0.614869	0.498892	0.506247
12.425	0.669046	0.642585	0.632531	0.530338	0.633639			12.425	0.518146	0.580005	0.579692	0.528271	0.635111	0.509714	0.507045
12.475	0.66693	0.64018	0.621115	0.533931	0.634034			12.475	0.518792	0.580699	0.579963	0.535587	0.619571	0.507696	0.514286
12.525	0.668878	0.634642	0.616166	0.537664	0.634785			12.525	0.531044	0.583525	0.580699	0.528841	0.609336	0.519878	0.516843
12.575	0.670281	0.64802	0.620267	0.537006	0.637691			12.575	0.518118	0.583621	0.583331	0.536097	0.628128	0.507124	0.513031
12.625	0.667895	0.636262	0.624111	0.540928	0.634585			12.625	0.529461	0.584234	0.584792	0.533317	0.630574	0.517018	0.514433
12.675	0.669226	0.648096	0.624284	0.535432	0.636732			12.675	0.53631	0.586758	0.584877	0.536826	0.623172	0.526571	0.519959
12.725	0.671267	0.643267	0.626386	0.540172	0.640838			12.725	0.527886	0.586334	0.586933	0.536348	0.624223	0.510112	0.523289
12.775	0.671381	0.639925	0.633781	0.541702	0.64017			12.775	0.531986	0.587423	0.587381	0.538542	0.623596	0.518696	0.523072
12.825	0.674045	0.64196	0.629851	0.543807	0.635894			12.825	0.527369	0.5896	0.588718	0.541893	0.62342	0.517666	0.516831
12.875	0.676693	0.645519	0.617096	0.548452	0.642174			12.875	0.542269	0.589574	0.589343	0.545392	0.630272	0.525254	0.522878
12.925	0.675239	0.656403	0.628282	0.546595	0.64398			12.925	0.540877	0.590608	0.590861	0.542547	0.62672	0.528653	0.527392
12.975	0.674978	0.644011	0.623205	0.547411	0.64476			12.975	0.539607	0.592531	0.591395	0.544474	0.63267	0.515666	0.519364
13.025	0.676969	0.653083	0.638226	0.554465	0.639599			13.025	0.541325	0.592029	0.593276	0.547801	0.638914	0.520567	0.523104
13.075	0.674088	0.645848	0.641389	0.544942	0.644855			13.075	0.541578	0.594062	0.594124	0.545028	0.6348	0.52211	0.524253
13.125	0.677383	0.639422	0.64317	0.549557	0.643974			13.125	0.534794	0.594777	0.594655	0.542098	0.635315	0.527443	0.534034
13.175	0.677511	0.652146	0.633747	0.555084	0.646721			13.175	0.548084	0.594524	0.596108	0.552309	0.642135	0.528881	0.531044
13.225	0.679529	0.653428	0.627354	0.548309	0.647452			13.225	0.543117	0.596516	0.596362	0.5511	0.636857	0.532062	0.51892
13.275	0.68198	0.641968	0.642201	0.550506	0.650939			13.275	0.545648	0.596613	0.598368	0.550854	0.639629	0.526659	0.525204
13.325	0.680162	0.659362	0.632092	0.558237	0.648609			13.325	0.542202	0.597696	0.599734	0.558832	0.648725	0.526221	0.523797
13.375	0.685161	0.654057	0.639737	0.552595	0.654895			13.375	0.545242	0.600263	0.59943	0.557426	0.645419	0.533658	0.524905
13.425	0.679706	0.661008	0.642755	0.558429	0.651994			13.425	0.550682	0.600657	0.602013	0.556201	0.647061	0.533755	0.534822
13.475	0.683628	0.657776	0.651497	0.553839	0.651201			13.475	0.561322	0.600065	0.602352	0.556713	0.640149	0.535097	0.527885
13.525	0.685286	0.653823	0.636551	0.558173	0.65273			13.525	0.554391	0.601164	0.603085	0.555805	0.644173	0.534202	0.533551
13.575	0.682265	0.669141	0.643313	0.562738	0.654226			13.575	0.553083	0.60383	0.603262	0.561087	0.651512	0.537181	0.541703
13.625	0.684695	0.659133	0.645925	0.561006	0.652958			13.625	0.553893	0.604269	0.605941	0.561223	0.641745	0.53364	0.529053
13.675	0.683434	0.656819	0.643304	0.562878	0.660405			13.675	0.56133	0.604265	0.606212	0.565387	0.649547	0.5319	0.539049
13.725	0.688769	0.663637	0.633521	0.563474	0.661562			13.725	0.557581	0.605824	0.606149	0.565796	0.642599	0.534691	0.53299
13.775	0.687026	0.654122	0.640875	0.560694	0.653866			13.775	0.56897	0.605042	0.608214	0.560549	0.655027	0.542448	0.534388
13.825	0.688012	0.650262	0.641206	0.56601	0.664616			13.825	0.558373	0.606744	0.607712	0.563733	0.651771	0.531775	0.532734
13.875	0.686972	0.658998	0.652005	0.569853	0.663558			13.875	0.559575	0.607881	0.60824	0.566867	0.655715	0.54065	0.550306
13.925	0.689934	0.671417	0.648288	0.564743	0.65996			13.925	0.573274	0.608939	0.609492	0.568046	0.65144	0.538805	0.541781
13.975	0.690089	0.656634	0.644782	0.56718	0.662068			13.975	0.569581	0.609555	0.611504	0.566315	0.651183	0.538942	0.540114
14.025	0.693189	0.669279	0.657686	0.57118	0.663819			14.025	0.573029	0.610227	0.611829	0.569342	0.655103	0.537807	0.540181
14.075	0.696316	0.649902	0.651393	0.569187	0.665522			14.075	0.56637	0.613697	0.614239	0.569571	0.650214	0.543191	0.541111
14.125	0.695907	0.662245	0.656806	0.568321	0.665024			14.125	0.575802	0.613207	0.61353	0.571997	0.658528	0.536277	0.542978
14.175	0.69617	0.676176	0.64784	0.569736	0.663958			14.175	0.577646	0.613116	0.615279	0.565423	0.658641	0.547768	0.538699
14.225	0.690543	0.65928	0.653273	0.574207	0.669858			14.225	0.573922	0.614344	0.616423	0.570604	0.657821	0.54768	0.541073
14.275	0.69245	0.661074	0.65804	0.577451	0.674243			14.275	0.569966	0.615198	0.617479	0.57127	0.665253	0.540525	0.546412
14.325	0.693399	0.659546	0.654325	0.5732	0.670451			14.325	0.5755	0.615306	0.617541	0.575157	0.649238	0.54787	0.551306
14.375	0.696942	0.673844	0.651011	0.573536	0.669052			14.375	0.580772	0.617822	0.619364	0.573096	0.646657	0.549472	0.540077
14.425	0.700608	0.651225	0.649905	0.575711	0.670754			14.425	0.576319	0.617751	0.620168	0.572532	0.657662	0.547254	0.551831
14.475	0.695435	0.666533	0.653126	0.578195	0.672135			14.475	0.57935	0.61923	0.621438	0.574746	0.661518	0.548375	0.552046
14.525	0.699215	0.668463	0.653944	0.585681	0.671221			14.525	0.579051	0.619408	0.621526	0.577016	0.655897	0.557931	0.553938
14.575	0.696401	0.656836	0.662882	0.579421	0.675171			14.575	0.582512	0.621074	0.621176	0.578327	0.666762	0.544066	0.551135
14.625	0.697525	0.661729	0.66038	0.583548	0.678158			14.625	0.583747	0.623118	0.623626	0.584753	0.659802	0.557435	0.558248
14.675	0.699384	0.661246	0.663223	0.584004	0.676241			14.675	0.581452	0.622751	0.62352	0.582905	0.660672	0.558235	0.557895
14.725	0.698879	0.667912	0.668578	0.587364	0.674622			14.725	0.586615	0.623958	0.625302	0.582442	0.658536	0.559899	0.554915
14.775	0.700386	0.662519	0.668528	0.58142	0.67591			14.775	0.582795	0.625716	0.625105	0.580636	0.662802	0.549949	0.554396
14.825	0.698819	0.66512	0.666901	0.584957	0.679688			14.825	0.587049	0.624756	0.626829	0.58687	0.665182	0.556579	0.562412
14.875	0.699145	0.675803	0.675617	0.587019	0.679336			14.875	0.581442	0.627892	0.627762	0.58785	0.666895	0.546056	0.563604
14.925	0.701186	0.675353	0.663791	0.592656	0.681951			14.925	0.588247	0.627589	0.627727	0.586527	0.668076	0.557409	0.553997
14.975	0.702939	0.674893	0.663592	0.591098	0.681564			14.975	0.588963	0.629408	0.627776	0.589213	0.666501	0.556184	0.55945
15.025	0.701956	0.667062	0.670652	0.588228	0.680598			15.025	0.589987	0.630669	0.63173	0.588022	0.670744	0.550744	0.560641
15.075	0.703472	0.67431	0.667208	0.593325	0.682097			15.075	0.592608	0.631501	0.629454	0.588927	0.676577	0.561522	0.561966
15.125	0.705686	0.677966	0.666197	0.590684	0.682589			15.125	0.592642	0.632465	0.631413	0.588328	0.669589	0.560258	0.566102
15.175	0.706758	0.673684	0.674489	0.593662	0.685148			15.175	0.597656	0.631325	0.63327	0.595883	0.668853	0.558322	0.55518
15.225	0.706714	0.668378	0.667074	0.593087	0.686726			15.225	0.599308	0.63132	0.633293	0.593306	0.667904	0.562759	0.563075
15.275	0.706612	0.678786	0.673046	0.595759	0.687692			15.275	0.599024	0.634027	0.633429	0.5945	0.667394	0.560337	0.570738
15.325	0.707928	0.679043	0.670679	0.599815	0.693032			15.325	0.606435	0.633455	0.634046	0.590897	0.671381	0.568579	0.566396
15.375	0.711377	0.680851	0.671292	0.59794	0.688828			15.375	0.598429	0.636089	0.635639	0.595553	0.66737	0.566514	0.554156
15.425	0.708162	0.674424	0.670816	0.598866	0.687749			15.425	0.604502	0.638964	0.635957	0.598999	0.670411	0.567812	0.561847
15.475	0.708358	0.678275	0.672367	0.59817	0.690477			15.475	0.601553	0.637599	0.637123	0.594173	0.679078	0.563231	0.563728
15.525	0.710854	0.67511	0.679441	0.599242	0.690762			15.525	0.603725	0.639546	0.639505	0.597445	0.67474	0.563143	0.565574
15.575	0.709484	0.675369	0.670103	0.598677	0.692254			15.575	0.605615	0.639132	0.63923	0.592805	0.675058	0.567158	0.564553
15.625	0.709433	0.670097	0.675695	0.599413	0.692608			15.625	0.603031	0.641325	0.640721	0.599231	0.669338	0.575237	0.566047
15.675	0.711537	0.675892	0.676507	0.601349	0.694051			15.675	0.606825	0.641271	0.642106	0.601641	0.674243	0.56274	0.573399
15.725	0.713889	0.682599	0.6791	0.601001	0.691725			15.725	0.605321	0.643237	0.64244	0.601727	0.682572	0.574462	0.572944
15.775	0.708568	0.683909	0.67839	0.608525	0.693494			15.775	0.614123	0.644292	0.641793	0.602105	0.685841	0.567698	0.577192
15.825	0.711795	0.676852	0.677017	0.602711	0.696169			15.825	0.607318	0.6446	0.642909	0.600028	0.678662	0.565616	0.575672
15.875	0.710516	0.673522	0.675811	0.603306	0.697172			15.875	0.618993	0.644877	0.644341	0.602258	0.68366	0.574994	0.568345
15.925	0.716887	0.683815	0.687308	0.605232	0.697114			15.925	0.611321	0.64605	0.645721	0.606015	0.675311	0.566442	0.576481
15.975	0.717538	0.674105	0.684547	0.608786	0.698487			15.975	0.61522	0.645685	0.646177	0.607287	0.688314	0.574672	0.582459
16.025	0.714608	0.674451	0.686085	0.607223	0.70196			16.025	0.618937	0.647089	0.647219	0.607248	0.679506	0.57234	0.574408
16.075	0.715644	0.683073	0.687432	0.60781	0.701717			16.075	0.617203	0.648279	0.647481	0.612447	0.686502	0.573569	0.573321
16.125	0.715626	0.679636	0.67673	0.603705	0.70107			16.125	0.624264	0.648885	0.648927	0.606257	0.682251	0.575406	0.579843
16.175	0.718643	0.677278	0.674443	0.612911	0.699515			16.175	0.617681	0.649203	0.650331	0.607353	0.684602	0.572169	0.576684
16.225	0.715087	0.696435	0.683364	0.608408	0.701017			16.225	0.615326	0.651834	0.651345	0.612454	0.676006	0.578805	0.576023
16.275	0.717549	0.686613	0.681868	0.612239	0.700606			16.275	0.621789	0.652573	0.651479	0.612319	0.680779	0.570622	0.576603
16.325	0.715899	0.691227	0.692258	0.610667	0.70192			16.325	0.623774	0.652664	0.651596	0.614267	0.681872	0.575791	0.582526
16.375	0.717267	0.679175	0.680968	0.62139	0.706744			16.375	0.630626	0.653448	0.653251	0.610774	0.68942	0.579827	0.569787
16.425	0.72049	0.682021	0.689353	0.615082	0.702791			16.425	0.631389	0.655254	0.654221	0.609043	0.686426	0.591577	0.576846
16.475	0.719707	0.679052	0.690236	0.613371	0.702391			16.475	0.631683	0.655428	0.655389	0.615816	0.685074	0.587621	0.586845
16.525	0.721743	0.683198	0.688078	0.616328	0.703978			16.525	0.628786	0.655801	0.655465	0.616498	0.688405	0.577766	0.588732
16.575	0.724625	0.680933	0.696407	0.61883	0.708477			16.575	0.630855	0.657652	0.65645	0.617577	0.692432	0.578419	0.582119
16.625	0.72342	0.678235	0.684994	0.617071	0.708736			16.625	0.628415	0.658346	0.658766	0.617186	0.694213	0.581902	0.590053
16.675	0.7209	0.681583	0.68472	0.620817	0.706225			16.675	0.633841	0.658633	0.658396	0.620718	0.69544	0.593897	0.587705
16.725	0.722492	0.696076	0.691534	0.619286	0.709272			16.725	0.626451	0.660048	0.659482	0.620427	0.690871	0.589991	0.586095
16.775	0.726031	0.697986	0.691884	0.618957	0.712528			16.775	0.63388	0.65988	0.659251	0.61928	0.685221	0.591165	0.586512
16.825	0.724239	0.697289	0.686905	0.621181	0.709534			16.825	0.634374	0.660334	0.661458	0.619636	0.691126	0.586816	0.589695
16.875	0.721513	0.683419	0.694658	0.619034	0.7123			16.875	0.637291	0.662556	0.661936	0.623368	0.694079	0.593088	0.588296
16.925	0.722666	0.688498	0.69032	0.621734	0.713891			16.925	0.640011	0.66326	0.662103	0.620303	0.694036	0.593968	0.595247
16.975	0.723337	0.684305	0.690645	0.622909	0.711798			16.975	0.639229	0.663749	0.664199	0.622873	0.697724	0.593112	0.59076
17.025	0.725426	0.686642	0.687708	0.627247	0.708657			17.025	0.641614	0.664424	0.663189	0.623157	0.694911	0.595668	0.583788
17.075	0.726222	0.692614	0.694593	0.627928	0.713696			17.075	0.636247	0.665135	0.664562	0.627261	0.689364	0.596644	0.589609
17.125	0.724535	0.685016	0.692721	0.624828	0.712915			17.125	0.632202	0.665029	0.666717	0.625412	0.691503	0.594133	0.597787
17.175	0.727547	0.687413	0.696656	0.624871	0.714206			17.175	0.642763	0.666152	0.666166	0.628052	0.696307	0.601762	0.597447
17.225	0.725616	0.701623	0.694215	0.620394	0.7152			17.225	0.644208	0.667556	0.667006	0.627573	0.691507	0.595372	0.599662
17.275	0.72894	0.683252	0.709949	0.629299	0.714451			17.275	0.641405	0.669074	0.66817	0.621672	0.698303	0.597945	0.597638
17.325	0.730356	0.701921	0.695949	0.629228	0.720476			17.325	0.64588	0.668681	0.668531	0.629777	0.696246	0.606855	0.606519
17.375	0.730754	0.692291	0.695794	0.632961	0.714871			17.375	0.644612	0.669218	0.669416	0.629384	0.6975	0.602579	0.602215
17.425	0.728309	0.694612	0.701986	0.629244	0.718449			17.425	0.643943	0.67079	0.670291	0.632494	0.695539	0.601388	0.610255
17.475	0.72953	0.684435	0.703215	0.629634	0.717709			17.475	0.639724	0.670407	0.671727	0.626146	0.69631	0.60116	0.608507
17.525	0.732929	0.695563	0.703032	0.631014	0.717291			17.525	0.647528	0.672074	0.672237	0.63067	0.704374	0.605099	0.598211
17.575	0.729876	0.691611	0.700749	0.631308	0.717788			17.575	0.649058	0.673333	0.67259	0.634332	0.705063	0.607887	0.605841
17.625	0.732462	0.693883	0.698437	0.633106	0.723453			17.625	0.653429	0.673434	0.67393	0.631262	0.705137	0.600404	0.598665
17.675	0.731982	0.703417	0.701241	0.634994	0.722867			17.675	0.647539	0.674862	0.673261	0.637443	0.707462	0.606451	0.60094
17.725	0.733845	0.705225	0.698317	0.641648	0.720246			17.725	0.655496	0.675303	0.67565	0.633549	0.705182	0.605599	0.605686
17.775	0.736517	0.704133	0.704372	0.631997	0.722812			17.775	0.652446	0.676405	0.67544	0.638103	0.706481	0.604081	0.599994
17.825	0.734598	0.700534	0.709008	0.639371	0.725467			17.825	0.652645	0.676389	0.675698	0.637063	0.707948	0.612456	0.61871
17.875	0.737224	0.695417	0.714655	0.637227	0.72526			17.875	0.653544	0.67683	0.67726	0.638867	0.702639	0.612674	0.619237
17.925	0.73451	0.696416	0.706249	0.639406	0.724776			17.925	0.656939	0.677905	0.677339	0.637229	0.706142	0.620718	0.610458
17.975	0.734477	0.691654	0.713889	0.63775	0.725205			17.975	0.650568	0.678507	0.678973	0.638385	0.706492	0.609957	0.614067
18.025	0.734151	0.707778	0.708433	0.64277	0.727433			18.025	0.652581	0.68015	0.6804	0.639798	0.711329	0.607593	0.613512
18.075	0.737175	0.696089	0.707483	0.639711	0.726973			18.075	0.658706	0.679524	0.681413	0.64039	0.712529	0.607011	0.610823
18.125	0.736146	0.697982	0.705655	0.63901	0.728076			18.125	0.658087	0.6798	0.680667	0.64278	0.710798	0.615067	0.60874
18.175	0.73692	0.706955	0.715396	0.641238	0.72679			18.175	0.655184	0.681581	0.681864	0.643118	0.707267	0.614931	0.618868
18.225	0.737734	0.702254	0.711332	0.642992	0.730274			18.225	0.660491	0.681002	0.683508	0.6399	0.709843	0.613023	0.628738
18.275	0.740794	0.700884	0.709768	0.641579	0.728553			18.275	0.662793	0.682846	0.68345	0.643604	0.714848	0.621683	0.617762
18.325	0.741627	0.700787	0.70815	0.641953	0.732139			18.325	0.660431	0.683028	0.683165	0.646723	0.713079	0.615295	0.618622
18.375	0.740911	0.704139	0.709306	0.644992	0.732558			18.375	0.658644	0.685889	0.684663	0.644792	0.704912	0.613877	0.617973
18.425	0.738891	0.701132	0.710438	0.647622	0.728422			18.425	0.664866	0.685353	0.685399	0.643918	0.709082	0.618993	0.618265
18.475	0.740808	0.700521	0.714868	0.648901	0.734161			18.475	0.663974	0.686701	0.686235	0.646387	0.714465	0.621871	0.620584
18.525	0.739349	0.707832	0.713996	0.648519	0.732361			18.525	0.663757	0.686727	0.686862	0.647441	0.715537	0.628499	0.616358
18.575	0.741086	0.710237	0.714079	0.644242	0.735365			18.575	0.665762	0.689147	0.687394	0.646441	0.708426	0.614796	0.62167
18.625	0.743279	0.701123	0.710765	0.647988	0.735519			18.625	0.66665	0.688266	0.688411	0.647885	0.720466	0.626705	0.62747
18.675	0.742586	0.713719	0.71494	0.649249	0.736792			18.675	0.66924	0.68877	0.689331	0.650819	0.713285	0.626688	0.624351
18.725	0.742159	0.714652	0.712224	0.651615	0.737606			18.725	0.668201	0.68978	0.689955	0.650277	0.711538	0.629745	0.619271
18.775	0.741459	0.715293	0.720535	0.648245	0.729736			18.775	0.672329	0.69044	0.691728	0.650049	0.711572	0.622056	0.623355
18.825	0.745069	0.704289	0.714425	0.650274	0.733519			18.825	0.667344	0.691155	0.690719	0.652719	0.714542	0.623434	0.621082
18.875	0.744846	0.7124	0.713344	0.654509	0.736998			18.875	0.667978	0.692056	0.692247	0.657232	0.716101	0.628	0.62615
18.925	0.745374	0.706838	0.723809	0.652572	0.738778			18.925	0.667072	0.693332	0.692301	0.650583	0.715122	0.624789	0.628624
18.975	0.746149	0.719637	0.713685	0.656497	0.743013			18.975	0.673327	0.692806	0.693134	0.654783	0.713952	0.624909	0.626918
19.025	0.745364	0.710356	0.716125	0.656064	0.740744			19.025	0.67182	0.693491	0.693097	0.655807	0.722899	0.630686	0.621755
19.075	0.745491	0.709053	0.716528	0.658228	0.737758			19.075	0.674602	0.694494	0.695135	0.653099	0.716113	0.638206	0.624238
19.125	0.747514	0.728109	0.72471	0.656576	0.739437			19.125	0.674685	0.69566	0.695975	0.657263	0.724297	0.626636	0.628689
19.175	0.745594	0.705786	0.724653	0.656271	0.7425			19.175	0.676444	0.695908	0.695638	0.660364	0.722691	0.632413	0.630122
19.225	0.747382	0.711932	0.720294	0.659152	0.739609			19.225	0.67225	0.696553	0.696993	0.656916	0.729381	0.627171	0.63614
19.275	0.751264	0.708982	0.726711	0.662181	0.739061			19.275	0.677735	0.69778	0.697211	0.659917	0.721387	0.627766	0.630872
19.325	0.749574	0.710137	0.723433	0.661815	0.739565			19.325	0.677091	0.697052	0.699077	0.659008	0.717677	0.636047	0.635753
19.375	0.747461	0.720491	0.719942	0.661066	0.744615			19.375	0.677804	0.699082	0.698578	0.659816	0.724845	0.631329	0.640013
19.425	0.75162	0.71584	0.73133	0.663307	0.746737			19.425	0.672811	0.69821	0.698594	0.663049	0.724067	0.644416	0.633786
19.475	0.749798	0.711771	0.724664	0.665867	0.741064			19.475	0.682513	0.700706	0.699556	0.661064	0.732632	0.640677	0.636041
19.525	0.7547	0.713643	0.731208	0.663359	0.741888			19.525	0.675686	0.701812	0.700466	0.657289	0.729785	0.633052	0.636991
19.575	0.753667	0.718462	0.726241	0.665788	0.745546			19.575	0.68074	0.701845	0.700957	0.663521	0.731134	0.631017	0.641317
19.625	0.751631	0.72415	0.725987	0.662169	0.745455			19.625	0.687282	0.701933	0.701984	0.661763	0.729482	0.631301	0.638149
19.675	0.753746	0.721751	0.72553	0.663399	0.745168			19.675	0.682435	0.702999	0.702907	0.662634	0.731403	0.633561	0.641273
19.725	0.753884	0.717002	0.732978	0.663923	0.746585			19.725	0.682913	0.703742	0.703798	0.664532	0.733349	0.640285	0.631671
19.775	0.753905	0.72557	0.72824	0.663137	0.749644			19.775	0.685355	0.703574	0.702692	0.66552	0.727028	0.638925	0.646559
19.825	0.753062	0.722055	0.732382	0.665818	0.746205			19.825	0.686636	0.705514	0.705209	0.667625	0.729674	0.643255	0.646564
19.875	0.754396	0.725729	0.731397	0.669534	0.748385			19.875	0.686335	0.704944	0.704832	0.665886	0.735761	0.636893	0.645146
19.925	0.756471	0.727558	0.727592	0.669457	0.749956			19.925	0.685445	0.706545	0.705715	0.669276	0.737142	0.642581	0.644888
19.975	0.756246	0.718274	0.732768	0.666454	0.750084			19.975	0.690202	0.706277	0.707412	0.666449	0.727431	0.647516	0.640929
20.025	0.755774	0.733977	0.731305	0.670413	0.75088			20.025	0.690909	0.707392	0.708607	0.669407	0.734491	0.645611	0.648785
20.075	0.758147	0.729303	0.729593	0.671027	0.750472			20.075	0.684316	0.709554	0.708296	0.670534	0.729865	0.652011	0.641558
20.125	0.756081	0.718799	0.737859	0.673159	0.747503			20.125	0.689167	0.708587	0.708446	0.671406	0.733874	0.64726	0.646446
20.175	0.757906	0.731068	0.7296	0.670995	0.751433			20.175	0.693295	0.709441	0.709563	0.670595	0.732181	0.656565	0.650873
20.225	0.759854	0.725107	0.731168	0.672796	0.751312			20.225	0.690927	0.710047	0.710422	0.675343	0.733435	0.643159	0.650547
20.275	0.760546	0.722638	0.730774	0.671857	0.755643			20.275	0.688745	0.711277	0.710548	0.673929	0.732996	0.653602	0.653424
20.325	0.758485	0.731456	0.7338	0.674147	0.752595			20.325	0.692571	0.710678	0.711579	0.671205	0.737358	0.657461	0.656708
20.375	0.76016	0.721782	0.735084	0.674044	0.756311			20.375	0.695851	0.712198	0.711316	0.6741	0.734951	0.654878	0.656246
20.425	0.75931	0.729876	0.740955	0.675965	0.753732			20.425	0.690303	0.71226	0.713385	0.675996	0.734667	0.662234	0.659798
20.475	0.761707	0.743517	0.741191	0.67666	0.754556			20.475	0.696672	0.713273	0.713657	0.676837	0.740781	0.653215	0.651817
20.525	0.7611	0.733476	0.735367	0.676578	0.756078			20.525	0.697101	0.714077	0.713641	0.67571	0.737861	0.652732	0.654362
20.575	0.760923	0.734912	0.745085	0.679339	0.756039			20.575	0.696183	0.714771	0.714221	0.677871	0.738352	0.659622	0.650905
20.625	0.763065	0.734163	0.740766	0.675468	0.756978			20.625	0.69915	0.714757	0.71648	0.677112	0.741751	0.652876	0.655201
20.675	0.763743	0.727724	0.738023	0.684233	0.754273			20.675	0.703981	0.715878	0.716331	0.682364	0.731516	0.661184	0.661762
20.725	0.763358	0.727926	0.741502	0.680173	0.757232			20.725	0.697162	0.716174	0.71709	0.677959	0.744956	0.662432	0.650578
20.775	0.7646	0.726114	0.739767	0.681995	0.757584			20.775	0.698684	0.717523	0.718596	0.677094	0.740595	0.662323	0.658398
20.825	0.763995	0.731563	0.743124	0.683066	0.75476			20.825	0.700663	0.717903	0.71844	0.681331	0.746164	0.661765	0.657711
20.875	0.765111	0.731688	0.749608	0.682446	0.758527			20.875	0.699679	0.71816	0.718478	0.677349	0.738433	0.662381	0.657401
20.925	0.765864	0.743787	0.734344	0.679096	0.758551			20.925	0.701852	0.718709	0.719502	0.680684	0.750359	0.65809	0.655351
20.975	0.76444	0.734438	0.739027	0.685152	0.760148			20.975	0.699875	0.720435	0.718843	0.680474	0.740698	0.66091	0.665718
21.025	0.764338	0.741856	0.74285	0.683757	0.760254			21.025	0.706618	0.720506	0.720821	0.683795	0.74184	0.667051	0.658826
21.075	0.768903	0.736824	0.744772	0.681126	0.760126			21.075	0.702129	0.719675	0.720268	0.682348	0.746411	0.663497	0.665023
21.125	0.768122	0.741189	0.747576	0.688432	0.759548			21.125	0.704464	0.719787	0.722047	0.682565	0.744822	0.663418	0.667686
21.175	0.768435	0.727767	0.741844	0.687159	0.759781			21.175	0.707995	0.722183	0.723078	0.683205	0.745092	0.660105	0.663638
21.225	0.769307	0.74093	0.751525	0.685314	0.764416			21.225	0.704663	0.722948	0.723596	0.68599	0.737378	0.665577	0.66887
21.275	0.766917	0.742185	0.753581	0.68783	0.761622			21.275	0.708083	0.723871	0.722729	0.688152	0.745827	0.664414	0.6719
21.325	0.768434	0.742636	0.748375	0.687894	0.763483			21.325	0.708599	0.723492	0.724879	0.684018	0.744539	0.667887	0.673264
21.375	0.771036	0.739136	0.74348	0.689208	0.7641			21.375	0.711128	0.724928	0.724855	0.688116	0.748922	0.672803	0.672543
21.425	0.772102	0.724708	0.75146	0.688412	0.762646			21.425	0.703504	0.725225	0.724776	0.688292	0.74956	0.673238	0.669826
21.475	0.77024	0.744539	0.749573	0.686781	0.762844			21.475	0.709321	0.725501	0.725687	0.687602	0.749811	0.668716	0.676679
21.525	0.77152	0.739484	0.747889	0.690359	0.761592			21.525	0.710247	0.726281	0.7265	0.690194	0.748244	0.671543	0.672966
21.575	0.771468	0.747893	0.750741	0.689955	0.766042			21.575	0.71217	0.726925	0.727264	0.691094	0.756982	0.67526	0.676283
21.625	0.77287	0.742295	0.754793	0.690907	0.766779			21.625	0.711012	0.727613	0.728789	0.689624	0.753163	0.677703	0.673825
21.675	0.77318	0.748435	0.750686	0.696184	0.767131			21.675	0.712865	0.727887	0.728774	0.695388	0.749663	0.672065	0.67419
21.725	0.773851	0.741007	0.752066	0.692961	0.768107			21.725	0.713554	0.728647	0.72962	0.691801	0.754234	0.679899	0.674485
21.775	0.773476	0.739346	0.754888	0.693669	0.768663			21.775	0.71422	0.729864	0.729443	0.690295	0.752933	0.676027	0.671469
21.825	0.77381	0.747987	0.748751	0.695073	0.765977			21.825	0.713193	0.730259	0.731272	0.695964	0.757691	0.674528	0.674971
21.875	0.776784	0.741213	0.760346	0.698143	0.768789			21.875	0.714562	0.730824	0.73102	0.69465	0.754045	0.675678	0.679448
21.925	0.775313	0.741408	0.755824	0.695442	0.767674			21.925	0.71325	0.731908	0.730565	0.696721	0.749681	0.678334	0.675933
21.975	0.777035	0.758177	0.750227	0.698806	0.769408			21.975	0.720939	0.732104	0.732491	0.696469	0.754266	0.673392	0.67563
22.025	0.777637	0.747405	0.761775	0.693537	0.769216			22.025	0.716205	0.733235	0.732875	0.699431	0.756848	0.681079	0.679267
22.075	0.776911	0.755016	0.757342	0.700121	0.770358			22.075	0.712038	0.733851	0.733152	0.698989	0.757723	0.68123	0.68542
22.125	0.778466	0.750008	0.751439	0.700501	0.768437			22.125	0.717426	0.733607	0.734779	0.699132	0.755578	0.681765	0.68487
22.175	0.775717	0.757496	0.76258	0.699773	0.771316			22.175	0.718185	0.734333	0.73451	0.699051	0.7517	0.680109	0.679792
22.225	0.779023	0.753842	0.760975	0.698344	0.77035			22.225	0.718628	0.735288	0.734047	0.7008	0.752076	0.682836	0.680704
22.275	0.779668	0.754448	0.76087	0.700826	0.773092			22.275	0.715729	0.735778	0.736419	0.699165	0.756884	0.687378	0.687028
22.325	0.777616	0.754848	0.756005	0.705627	0.776287			22.325	0.71911	0.736961	0.736057	0.701866	0.761641	0.67903	0.687978
22.375	0.781026	0.750161	0.757116	0.702401	0.771679			22.375	0.722775	0.736884	0.736505	0.704406	0.760683	0.680955	0.689497
22.425	0.778997	0.753102	0.757609	0.706761	0.773613			22.425	0.724214	0.737913	0.737129	0.702391	0.753867	0.689613	0.67723
22.475	0.780342	0.754595	0.762577	0.704214	0.775171			22.475	0.724228	0.73829	0.738479	0.704415	0.753208	0.688016	0.690554
22.525	0.782343	0.760941	0.760968	0.703465	0.774547			22.525	0.721604	0.739349	0.73814	0.70429	0.763527	0.688503	0.68511
22.575	0.782513	0.757089	0.763302	0.70527	0.776035			22.575	0.724387	0.739896	0.737925	0.704777	0.763517	0.689733	0.682402
22.625	0.782554	0.762521	0.75698	0.70318	0.776419			22.625	0.728702	0.739304	0.739257	0.708007	0.764091	0.683503	0.695561
22.675	0.781598	0.765467	0.75983	0.702409	0.776605			22.675	0.724179	0.740376	0.7406	0.70788	0.756611	0.693334	0.685408
22.725	0.782743	0.761278	0.764909	0.707571	0.7762			22.725	0.729759	0.741271	0.741092	0.707297	0.762448	0.693815	0.689595
22.775	0.781381	0.754126	0.759621	0.706358	0.777097			22.775	0.724243	0.742213	0.74145	0.707821	0.769975	0.693985	0.695274
22.825	0.782631	0.756889	0.757707	0.710751	0.778083			22.825	0.72545	0.74246	0.741995	0.708118	0.763165	0.688733	0.690983
22.875	0.783067	0.761013	0.767051	0.711795	0.77758			22.875	0.722754	0.742919	0.743403	0.709077	0.760593	0.694914	0.690696
22.925	0.785149	0.762637	0.762598	0.711387	0.777782			22.925	0.722958	0.742305	0.742743	0.712847	0.758429	0.691189	0.692687
22.975	0.784451	0.753492	0.761585	0.710188	0.778479			22.975	0.730306	0.743993	0.744089	0.714376	0.765463	0.692295	0.698124
23.025	0.783683	0.763515	0.765912	0.715195	0.779567			23.025	0.73269	0.74367	0.744484	0.711388	0.760535	0.685785	0.697946
23.075	0.787796	0.753193	0.765266	0.712293	0.777938			23.075	0.730933	0.745516	0.744956	0.712857	0.765124	0.692981	0.695027
23.125	0.786018	0.763938	0.764388	0.716551	0.781767			23.125	0.73033	0.745566	0.746098	0.714385	0.762025	0.699251	0.694748
23.175	0.786717	0.753638	0.770147	0.714123	0.780864			23.175	0.731646	0.745862	0.746297	0.7107	0.768958	0.704268	0.694447
23.225	0.788379	0.761932	0.766452	0.715271	0.779291			23.225	0.736045	0.746211	0.746485	0.71401	0.762683	0.694262	0.697436
23.275	0.788131	0.769971	0.767169	0.716676	0.782398			23.275	0.738884	0.748099	0.747558	0.715065	0.764748	0.699294	0.698939
23.325	0.787663	0.756852	0.76959	0.714306	0.780835			23.325	0.732445	0.749026	0.747535	0.713882	0.761409	0.701198	0.69566
23.375	0.78719	0.76038	0.768299	0.718142	0.781955			23.375	0.736153	0.749234	0.749187	0.714649	0.770927	0.699978	0.696542
23.425	0.788312	0.769028	0.765261	0.718145	0.781497			23.425	0.736668	0.74873	0.749203	0.717051	0.763646	0.708307	0.699663
23.475	0.789275	0.765532	0.774106	0.714065	0.782647			23.475	0.738583	0.749556	0.749656	0.721282	0.76618	0.701953	0.705925
23.525	0.791091	0.766153	0.770819	0.716929	0.783532			23.525	0.738198	0.750891	0.749801	0.719243	0.774927	0.704946	0.705724
23.575	0.788976	0.761424	0.772298	0.723203	0.784862			23.575	0.741404	0.750962	0.749801	0.719119	0.77189	0.701975	0.701415
23.625	0.791013	0.768344	0.769968	0.724007	0.784526			23.625	0.738586	0.751346	0.751305	0.719997	0.772035	0.702272	0.707375
23.675	0.789956	0.772478	0.764759	0.722844	0.785224			23.675	0.734734	0.751558	0.751877	0.719975	0.771694	0.706302	0.698607
23.725	0.793408	0.766883	0.770348	0.723612	0.785576			23.725	0.737393	0.752517	0.752366	0.719947	0.769213	0.707428	0.705248
23.775	0.791652	0.778946	0.777087	0.724018	0.786727			23.775	0.743828	0.753926	0.753295	0.720216	0.770781	0.710271	0.709818
23.825	0.793926	0.77101	0.768566	0.723723	0.783837			23.825	0.741027	0.75387	0.753966	0.723518	0.771421	0.710568	0.70768
23.875	0.792897	0.768193	0.775338	0.727208	0.786619			23.875	0.741569	0.754909	0.754256	0.722378	0.770145	0.709169	0.706872
23.925	0.792151	0.760498	0.772593	0.723087	0.785676			23.925	0.740673	0.754326	0.754655	0.726335	0.773421	0.705393	0.70856
23.975	0.793271	0.780964	0.769553	0.725706	0.7886			23.975	0.742728	0.755322	0.755873	0.723441	0.774297	0.70967	0.71402
24.025	0.794014	0.776051	0.774337	0.72635	0.786537			24.025	0.742496	0.756212	0.756373	0.723608	0.776229	0.710258	0.714224
24.075	0.794832	0.775935	0.777997	0.723613	0.786542			24.075	0.745678	0.755932	0.756231	0.724072	0.774075	0.707626	0.718718
24.125	0.79455	0.768073	0.779885	0.723895	0.788962			24.125	0.74228	0.757058	0.756585	0.7257	0.77264	0.711588	0.7142
24.175	0.796165	0.765299	0.773172	0.729116	0.789759			24.175	0.746828	0.757278	0.757663	0.727984	0.775123	0.716184	0.711797
24.225	0.793898	0.77394	0.781348	0.726603	0.787509			24.225	0.745835	0.758041	0.758328	0.729811	0.772582	0.719816	0.716399
24.275	0.798507	0.770219	0.780802	0.731455	0.791048			24.275	0.746948	0.75787	0.758904	0.728985	0.773774	0.717025	0.708882
24.325	0.796648	0.768959	0.777096	0.730948	0.78988			24.325	0.749068	0.759047	0.758713	0.730498	0.778233	0.713384	0.718259
24.375	0.798166	0.778038	0.779703	0.730385	0.789644			24.375	0.743593	0.760155	0.758698	0.730382	0.777564	0.71513	0.715901
24.425	0.798608	0.765531	0.780923	0.730926	0.790349			24.425	0.749972	0.760481	0.759904	0.732162	0.779323	0.709933	0.710378
24.475	0.798116	0.771991	0.779891	0.729939	0.789979			24.475	0.750869	0.761005	0.761039	0.732349	0.779169	0.719021	0.711316
24.525	0.80121	0.775127	0.77644	0.729299	0.790198			24.525	0.747582	0.761986	0.761369	0.733716	0.785221	0.715148	0.719624
24.575	0.800584	0.770293	0.776548	0.734026	0.791867			24.575	0.749586	0.761467	0.76162	0.733599	0.781335	0.719246	0.715531
24.625	0.801119	0.76864	0.780261	0.734826	0.79419			24.625	0.751153	0.761922	0.762605	0.734679	0.780035	0.721403	0.72175
24.675	0.799452	0.773041	0.783814	0.735891	0.792043			24.675	0.753365	0.763628	0.762842	0.7325	0.779855	0.720121	0.725837
24.725	0.80112	0.771423	0.785714	0.732005	0.790739			24.725	0.749204	0.764738	0.763549	0.735424	0.779119	0.721406	0.726634
24.775	0.801533	0.781225	0.778159	0.734913	0.794634			24.775	0.754252	0.765577	0.764115	0.735268	0.778014	0.721019	0.720511
24.825	0.800734	0.77641	0.781425	0.734723	0.793722			24.825	0.751523	0.764578	0.764471	0.736208	0.778382	0.717805	0.719722
24.875	0.801004	0.777843	0.781128	0.737544	0.794347			24.875	0.753306	0.765017	0.765376	0.739904	0.782072	0.721686	0.729219
24.925	0.801336	0.779877	0.77813	0.741731	0.794349			24.925	0.753679	0.766002	0.765992	0.736425	0.782033	0.725176	0.733637
24.975	0.802052	0.7794	0.784938	0.739845	0.794353			24.975	0.755258	0.766318	0.76653	0.736887	0.783705	0.722304	0.726415
25.025	0.802737	0.776552	0.782781	0.739794	0.79495			25.025	0.757074	0.766889	0.766523	0.739102	0.785062	0.722828	0.726571
25.075	0.805299	0.773371	0.782601	0.739266	0.795557			25.075	0.754913	0.767368	0.767824	0.742237	0.779105	0.72506	0.72308
25.125	0.805535	0.779805	0.790652	0.737033	0.796749			25.125	0.75622	0.767184	0.76847	0.741927	0.782198	0.721916	0.72917
25.175	0.804729	0.779094	0.786528	0.743248	0.798385			25.175	0.756353	0.768432	0.768738	0.742288	0.780232	0.726709	0.730278
25.225	0.801836	0.774843	0.785442	0.740444	0.796676			25.225	0.75752	0.769371	0.769492	0.743124	0.784967	0.726422	0.731286
25.275	0.803268	0.779736	0.780446	0.742708	0.79744			25.275	0.757567	0.769911	0.769848	0.742671	0.779532	0.727851	0.726045
25.325	0.80468	0.780387	0.784627	0.742641	0.799435			25.325	0.758471	0.771198	0.771062	0.742819	0.788472	0.728835	0.72735
25.375	0.805938	0.782861	0.786264	0.745523	0.798432			25.375	0.759477	0.771143	0.770875	0.746025	0.784578	0.729948	0.722652
25.425	0.806058	0.787796	0.785076	0.744356	0.797735			25.425	0.760026	0.771245	0.771366	0.744781	0.789762	0.73548	0.728836
25.475	0.807492	0.787543	0.787458	0.7451	0.798314			25.475	0.761509	0.771688	0.772383	0.744941	0.783606	0.734656	0.729336
25.525	0.806445	0.778578	0.788783	0.746803	0.798051			25.525	0.75848	0.773013	0.771864	0.743819	0.787149	0.734971	0.734114
25.575	0.806817	0.784672	0.788725	0.74638	0.799602			25.575	0.766684	0.772961	0.773179	0.74659	0.789922	0.733402	0.731022
25.625	0.807944	0.784981	0.791926	0.746392	0.799054			25.625	0.766558	0.772906	0.773804	0.746775	0.78677	0.730487	0.730404
25.675	0.810071	0.782885	0.792283	0.746431	0.800133			25.675	0.763706	0.774416	0.774546	0.746399	0.786178	0.732507	0.735911
25.725	0.806469	0.786259	0.790784	0.748555	0.799973			25.725	0.761748	0.774293	0.774264	0.745327	0.788054	0.734367	0.733219
25.775	0.809109	0.782177	0.785475	0.748803	0.802337			25.775	0.765471	0.774829	0.775326	0.74824	0.790727	0.731604	0.737255
25.825	0.811189	0.786916	0.79396	0.750802	0.800032			25.825	0.765658	0.775781	0.774987	0.750044	0.78842	0.735639	0.741982
25.875	0.810976	0.78831	0.790689	0.75217	0.80158			25.875	0.766594	0.775877	0.77597	0.749405	0.794044	0.736929	0.72968
25.925	0.811192	0.793202	0.790769	0.753583	0.803614			25.925	0.767214	0.776306	0.776617	0.750221	0.790207	0.73924	0.735888
25.975	0.809744	0.791148	0.790772	0.750741	0.801826			25.975	0.761343	0.777216	0.776962	0.751167	0.78953	0.736763	0.734822
26.025	0.810595	0.787909	0.793141	0.752086	0.805166			26.025	0.766967	0.776506	0.778968	0.752246	0.791427	0.741209	0.743764
26.075	0.811485	0.796971	0.789658	0.751707	0.805501			26.075	0.767457	0.778394	0.779102	0.752826	0.795628	0.741399	0.739419
26.125	0.811029	0.783156	0.796057	0.754449	0.804083			26.125	0.770163	0.779304	0.778544	0.752378	0.792565	0.739074	0.745434
26.175	0.812331	0.792477	0.794582	0.754074	0.802644			26.175	0.764234	0.779371	0.7798	0.753334	0.796377	0.741212	0.744273
26.225	0.812021	0.791196	0.796419	0.754163	0.805017			26.225	0.77035	0.780646	0.780715	0.757104	0.794122	0.742969	0.741291
26.275	0.814622	0.784029	0.793619	0.755979	0.806275			26.275	0.76484	0.77992	0.780889	0.75503	0.796673	0.740661	0.738353
26.325	0.815578	0.791341	0.795027	0.755224	0.807699			26.325	0.766695	0.781431	0.780554	0.7548	0.798813	0.739832	0.740189
26.375	0.813296	0.787948	0.796143	0.756345	0.807562			26.375	0.77113	0.781028	0.781287	0.756813	0.795738	0.741532	0.741334
26.425	0.813228	0.79573	0.799811	0.75611	0.806762			26.425	0.771806	0.782155	0.782857	0.756485	0.796153	0.75221	0.742177
26.475	0.816267	0.784594	0.803927	0.758038	0.807631			26.475	0.771985	0.782761	0.782686	0.758671	0.799145	0.742565	0.742643
26.525	0.81455	0.785836	0.79921	0.756577	0.806377			26.525	0.774075	0.783577	0.782843	0.759259	0.794515	0.752328	0.745143
26.575	0.816348	0.788756	0.799035	0.758404	0.809525			26.575	0.771904	0.784103	0.78353	0.760193	0.799784	0.747386	0.741343
26.625	0.815848	0.789245	0.801017	0.756306	0.806812			26.625	0.768354	0.784135	0.784958	0.7572	0.796018	0.74608	0.750911
26.675	0.816578	0.791019	0.796994	0.760815	0.8091			26.675	0.777837	0.785296	0.784746	0.76053	0.795179	0.743311	0.754379
26.725	0.816673	0.794505	0.798332	0.760536	0.808614			26.725	0.774533	0.784525	0.785552	0.757716	0.799351	0.74211	0.742597
26.775	0.815667	0.804282	0.801935	0.760419	0.81081			26.775	0.777873	0.785817	0.785973	0.761681	0.801925	0.751884	0.749355
26.825	0.818368	0.802451	0.801974	0.761716	0.808204			26.825	0.777545	0.786426	0.786521	0.763411	0.802785	0.754187	0.749529
26.875	0.817613	0.793934	0.80407	0.760663	0.808683			26.875	0.775567	0.787716	0.786853	0.763478	0.800666	0.753881	0.74474
26.925	0.818596	0.796009	0.798178	0.762864	0.810871			26.925	0.774866	0.787858	0.786751	0.761211	0.79635	0.755922	0.750149
26.975	0.819682	0.793212	0.801216	0.762147	0.809717			26.975	0.773657	0.787482	0.788045	0.760003	0.799658	0.75472	0.747585
27.025	0.818111	0.795752	0.805354	0.76546	0.81132			27.025	0.774763	0.788314	0.788156	0.764685	0.800247	0.754112	0.755867
27.075	0.822178	0.79885	0.802288	0.763362	0.811569			27.075	0.78145	0.788983	0.788651	0.763339	0.80152	0.754053	0.750467
27.125	0.819967	0.796803	0.799342	0.768199	0.812155			27.125	0.780252	0.789869	0.78954	0.766777	0.801051	0.751362	0.753092
27.175	0.820834	0.801593	0.800245	0.766019	0.811812			27.175	0.774264	0.789593	0.790018	0.767676	0.802226	0.757305	0.759624
27.225	0.821462	0.798448	0.80133	0.76627	0.8125			27.225	0.779582	0.790067	0.791224	0.766937	0.801848	0.76058	0.758282
27.275	0.82091	0.801284	0.809796	0.767906	0.811426			27.275	0.782693	0.790835	0.792252	0.766994	0.801404	0.757905	0.754076
27.325	0.822458	0.796018	0.80322	0.767852	0.815202			27.325	0.783032	0.791249	0.791506	0.767954	0.80495	0.751896	0.75663
27.375	0.82193	0.800793	0.805311	0.769046	0.814568			27.375	0.77887	0.79295	0.791313	0.769494	0.807923	0.755689	0.757999
27.425	0.8235	0.801875	0.808587	0.770723	0.813115			27.425	0.779482	0.792354	0.79261	0.769705	0.800323	0.758878	0.75531
27.475	0.824996	0.798759	0.80107	0.770034	0.815224			27.475	0.783656	0.792784	0.791801	0.767906	0.809686	0.760449	0.758811
27.525	0.822427	0.799994	0.802903	0.76949	0.814455			27.525	0.781925	0.792466	0.793522	0.770784	0.807908	0.760553	0.758317
27.575	0.822606	0.804791	0.808349	0.768694	0.814437			27.575	0.781172	0.793256	0.793331	0.771415	0.805694	0.762627	0.758087
27.625	0.823836	0.800386	0.807226	0.772815	0.815123			27.625	0.780774	0.79472	0.795652	0.772635	0.806605	0.761969	0.756749
27.675	0.825989	0.800958	0.810992	0.773002	0.818028			27.675	0.784217	0.794883	0.795239	0.771275	0.810652	0.762984	0.75813
27.725	0.823393	0.799054	0.810643	0.774791	0.817613			27.725	0.783515	0.794964	0.794646	0.772185	0.808123	0.758436	0.75796
27.775	0.823642	0.791284	0.811208	0.773472	0.816184			27.775	0.779018	0.796077	0.796162	0.7741	0.808172	0.760634	0.766557
27.825	0.826872	0.803576	0.809919	0.776329	0.817855			27.825	0.786988	0.796328	0.796584	0.774375	0.80936	0.761593	0.761688
27.875	0.826856	0.800254	0.812452	0.773193	0.818334			27.875	0.786187	0.796621	0.796258	0.777321	0.805831	0.768351	0.764167
27.925	0.828256	0.806691	0.812962	0.773735	0.819094			27.925	0.787235	0.798357	0.797626	0.775226	0.811456	0.763488	0.764768
27.975	0.825938	0.803933	0.812464	0.7755	0.819454			27.975	0.786088	0.797701	0.798673	0.773756	0.816465	0.763043	0.761674
28.025	0.826531	0.803463	0.80913	0.774931	0.821514			28.025	0.790621	0.798822	0.798163	0.777498	0.812593	0.762923	0.766024
28.075	0.828444	0.801824	0.812254	0.777922	0.820357			28.075	0.785193	0.799151	0.798355	0.774493	0.809901	0.771106	0.762903
28.125	0.828379	0.802396	0.810984	0.775789	0.82131			28.125	0.78807	0.798932	0.800607	0.777929	0.8118	0.764291	0.767556
28.175	0.829011	0.810158	0.812312	0.779009	0.819614			28.175	0.790373	0.801215	0.799789	0.778178	0.811136	0.767049	0.762008
28.225	0.831625	0.80498	0.81805	0.7791	0.821586			28.225	0.788974	0.801117	0.799919	0.778135	0.812825	0.769426	0.768231
28.275	0.831144	0.80284	0.813973	0.780635	0.823651			28.275	0.790589	0.80108	0.800728	0.777738	0.813346	0.770899	0.772148
28.325	0.829538	0.808791	0.814261	0.780968	0.823227			28.325	0.789391	0.800792	0.800822	0.781371	0.812369	0.772495	0.770897
28.375	0.831394	0.814269	0.815199	0.780932	0.821926			28.375	0.792124	0.802474	0.802179	0.778426	0.812938	0.765544	0.765066
28.425	0.830417	0.801376	0.814101	0.781574	0.822261			28.425	0.793255	0.80151	0.802373	0.783193	0.817008	0.769483	0.768418
28.475	0.832146	0.808661	0.815734	0.783732	0.822337			28.475	0.793652	0.803561	0.80324	0.780221	0.814142	0.771527	0.770759
28.525	0.832161	0.804242	0.819056	0.783381	0.823257			28.525	0.791769	0.803679	0.803145	0.781891	0.818735	0.770974	0.769612
28.575	0.832923	0.809084	0.819539	0.782948	0.822288			28.575	0.791942	0.804938	0.803786	0.78073	0.812541	0.77337	0.778091
28.625	0.832821	0.806059	0.817081	0.785044	0.82439			28.625	0.79276	0.804971	0.804614	0.782686	0.814173	0.772269	0.774426
28.675	0.831914	0.805539	0.816531	0.782604	0.824848			28.675	0.792986	0.805753	0.805423	0.784585	0.822203	0.771081	0.770469
28.725	0.834698	0.807132	0.817162	0.785135	0.825579			28.725	0.798357	0.805193	0.80485	0.783221	0.815189	0.77265	0.76992
28.775	0.833031	0.810103	0.816183	0.784256	0.825379			28.775	0.797428	0.805823	0.805668	0.786814	0.81644	0.778041	0.775453
28.825	0.834457	0.804154	0.815495	0.785699	0.825704			28.825	0.795297	0.806333	0.806404	0.786826	0.817024	0.774264	0.772566
28.875	0.835381	0.808686	0.816726	0.786544	0.826446			28.875	0.801013	0.807321	0.807306	0.785563	0.822929	0.775945	0.779943
28.925	0.835184	0.814299	0.816228	0.786653	0.827149			28.925	0.798594	0.808625	0.807589	0.785542	0.819364	0.780532	0.779952
28.975	0.836534	0.811327	0.816718	0.78713	0.82736			28.975	0.795386	0.808477	0.80835	0.787492	0.818731	0.778299	0.777394
29.025	0.836183	0.810833	0.820486	0.786753	0.82765			29.025	0.79945	0.808086	0.807823	0.78661	0.817257	0.77537	0.778848
29.075	0.836534	0.806113	0.820697	0.787762	0.828255			29.075	0.792831	0.809045	0.808484	0.786844	0.820875	0.776692	0.781317
29.125	0.837549	0.814214	0.81844	0.791726	0.829345			29.125	0.798457	0.809705	0.809686	0.785926	0.814651	0.779274	0.780213
29.175	0.837298	0.811651	0.821866	0.790837	0.826872			29.175	0.798858	0.810042	0.809459	0.787465	0.820156	0.78334	0.784556
29.225	0.838921	0.818992	0.818944	0.793144	0.829221			29.225	0.802257	0.809625	0.809872	0.789153	0.821807	0.783932	0.785765
29.275	0.837527	0.817736	0.821382	0.792626	0.82898			29.275	0.800595	0.810879	0.810696	0.792296	0.81776	0.783233	0.785263
29.325	0.838935	0.817154	0.826099	0.792599	0.831387			29.325	0.798639	0.810845	0.811517	0.790515	0.822784	0.785708	0.787124
29.375	0.839207	0.814581	0.823973	0.793692	0.830098			29.375	0.801089	0.811756	0.81136	0.790584	0.820622	0.78173	0.784383
29.425	0.838834	0.819319	0.824206	0.791607	0.830487			29.425	0.802285	0.812295	0.811956	0.792181	0.822326	0.782661	0.782873
29.475	0.840413	0.81689	0.822171	0.793327	0.830584			29.475	0.806373	0.812175	0.813223	0.792371	0.819665	0.787049	0.778395
29.525	0.838082	0.81578	0.822942	0.796429	0.83102			29.525	0.805184	0.813193	0.813314	0.789975	0.821933	0.788451	0.788199
29.575	0.842111	0.813071	0.821685	0.79526	0.82959			29.575	0.805125	0.813961	0.813569	0.795149	0.826914	0.7883	0.784636
29.625	0.84	0.819234	0.820792	0.794579	0.831266			29.625	0.806049	0.813661	0.813588	0.796876	0.82159	0.791996	0.783482
29.675	0.840056	0.814979	0.827676	0.794267	0.835312			29.675	0.805608	0.815062	0.815019	0.796129	0.825414	0.782653	0.789257
29.725	0.840498	0.814789	0.825725	0.794733	0.831625			29.725	0.80561	0.814736	0.815374	0.794786	0.824396	0.783132	0.787453
29.775	0.842724	0.813	0.827076	0.796459	0.833728			29.775	0.807223	0.815405	0.815595	0.797227	0.826549	0.786691	0.790492
29.825	0.842427	0.816947	0.821726	0.797459	0.832646			29.825	0.803482	0.816358	0.815618	0.798809	0.831246	0.79434	0.795112
29.875	0.842919	0.813815	0.830775	0.795876	0.832815			29.875	0.805974	0.817007	0.816689	0.797889	0.824134	0.79118	0.786748
29.925	0.842763	0.816251	0.825202	0.799076	0.834683			29.925	0.808341	0.816059	0.816523	0.79825	0.824626	0.785635	0.793273
29.975	0.843767	0.815472	0.828887	0.799454	0.834515			29.975	0.80859	0.816492	0.817045	0.800366	0.828451	0.789549	0.787276
30.025	0.842917	0.81963	0.830829	0.799039	0.835014			30.025	0.808407	0.818212	0.818745	0.798345	0.827592	0.790263	0.793087
30.075	0.843053	0.820279	0.831099	0.800518	0.834507			30.075	0.806645	0.819291	0.818547	0.800585	0.826194	0.793014	0.790179
30.125	0.843791	0.819102	0.830991	0.80208	0.835088			30.125	0.813112	0.818514	0.818521	0.798999	0.830635	0.792039	0.792573
30.175	0.844938	0.817717	0.828368	0.801881	0.836793			30.175	0.811476	0.819659	0.81943	0.801399	0.833331	0.790562	0.792232
30.225	0.844487	0.820397	0.826524	0.804759	0.835582			30.225	0.810881	0.820344	0.820148	0.801134	0.826734	0.793282	0.794515
30.275	0.846188	0.821765	0.829439	0.802585	0.835187			30.275	0.811716	0.821135	0.820355	0.802394	0.831424	0.796608	0.793121
30.325	0.846262	0.815249	0.830724	0.804192	0.83735			30.325	0.809869	0.821311	0.820347	0.800835	0.830268	0.79486	0.789074
30.375	0.845006	0.82147	0.826994	0.804884	0.837557			30.375	0.815049	0.821662	0.8217	0.805777	0.828788	0.793694	0.796126
30.425	0.846914	0.820286	0.834294	0.804295	0.838016			30.425	0.812932	0.821137	0.822074	0.804953	0.827787	0.791919	0.796885
30.475	0.847326	0.822625	0.829983	0.803861	0.837771			30.475	0.814484	0.821821	0.821418	0.803788	0.83249	0.802436	0.800987
30.525	0.847614	0.824281	0.833812	0.807793	0.837868			30.525	0.814489	0.823021	0.823026	0.805843	0.829773	0.795918	0.80266
30.575	0.848057	0.827304	0.832902	0.805137	0.839009			30.575	0.815047	0.823332	0.823567	0.807186	0.834658	0.797098	0.796089
30.625	0.847293	0.824692	0.833428	0.808907	0.838044			30.625	0.81448	0.823573	0.823844	0.804773	0.832279	0.799204	0.804271
30.675	0.849923	0.818371	0.829845	0.804947	0.84217			30.675	0.814976	0.824249	0.823819	0.808222	0.828779	0.801097	0.802187
30.725	0.848769	0.823902	0.831497	0.808649	0.84177			30.725	0.815951	0.824099	0.824833	0.809865	0.832479	0.798191	0.801838
30.775	0.849991	0.826912	0.833591	0.808757	0.841686			30.775	0.816567	0.825369	0.825314	0.807677	0.838442	0.796856	0.802184
30.825	0.84863	0.823003	0.834452	0.808958	0.839544			30.825	0.820231	0.825337	0.826032	0.808789	0.834821	0.801578	0.805597
30.875	0.850543	0.826982	0.834792	0.809701	0.841558			30.875	0.818503	0.825474	0.825704	0.807162	0.8307	0.801626	0.801885
30.925	0.851286	0.829639	0.837366	0.810967	0.840995			30.925	0.820869	0.826432	0.826644	0.810684	0.833007	0.803431	0.801909
30.975	0.85113	0.830785	0.836626	0.811175	0.843075			30.975	0.819612	0.826322	0.826283	0.809939	0.832367	0.806137	0.801326
31.025	0.849864	0.827867	0.83837	0.81184	0.841137			31.025	0.818244	0.827612	0.826483	0.811223	0.833518	0.811066	0.805101
31.075	0.851826	0.821364	0.839693	0.811742	0.841191			31.075	0.820889	0.827396	0.827661	0.810403	0.83938	0.802673	0.802332
31.125	0.852395	0.827079	0.839436	0.813021	0.842891			31.125	0.820243	0.827966	0.828088	0.813409	0.839393	0.808159	0.809539
31.175	0.851728	0.836131	0.836816	0.813074	0.843556			31.175	0.82252	0.828587	0.828358	0.813064	0.837247	0.809366	0.810026
31.225	0.853529	0.828806	0.836273	0.814894	0.843668			31.225	0.823837	0.828554	0.828887	0.813121	0.835005	0.806457	0.80533
31.275	0.852061	0.826453	0.839345	0.815629	0.843881			31.275	0.825301	0.828578	0.827988	0.812103	0.838446	0.806689	0.803328
31.325	0.852536	0.833112	0.838158	0.816949	0.843859			31.325	0.822345	0.829287	0.830238	0.813432	0.838585	0.807718	0.810107
31.375	0.85313	0.82524	0.840778	0.816517	0.843234			31.375	0.823194	0.83065	0.830932	0.815691	0.835517	0.807974	0.809211
31.425	0.853524	0.828347	0.842221	0.8155	0.844716			31.425	0.822787	0.830701	0.830508	0.812864	0.839481	0.808595	0.808001
31.475	0.853367	0.827727	0.840712	0.81666	0.846361			31.475	0.825412	0.831394	0.831487	0.815712	0.838799	0.813256	0.812609
31.525	0.854356	0.832125	0.841475	0.818902	0.845795			31.525	0.823479	0.831537	0.831726	0.815428	0.838428	0.812982	0.808329
31.575	0.853356	0.829147	0.834555	0.815126	0.846826			31.575	0.827179	0.832918	0.831957	0.816069	0.837738	0.810795	0.813138
31.625	0.854571	0.836169	0.846065	0.817571	0.847966			31.625	0.8267	0.833304	0.832364	0.815521	0.842466	0.81576	0.812619
31.675	0.855319	0.836489	0.83998	0.820506	0.847781			31.675	0.827985	0.832235	0.833347	0.817427	0.840774	0.810658	0.813999
31.725	0.85645	0.830497	0.842909	0.817113	0.848749			31.725	0.831249	0.833575	0.832885	0.820809	0.837416	0.811708	0.811608
31.775	0.855033	0.823926	0.842742	0.820492	0.846974			31.775	0.828651	0.834495	0.834337	0.81742	0.843177	0.807804	0.811976
31.825	0.856452	0.831728	0.840814	0.819635	0.847698			31.825	0.828758	0.834741	0.834515	0.818517	0.844537	0.819373	0.81742
31.875	0.856222	0.840139	0.842863	0.820949	0.848076			31.875	0.824626	0.835611	0.834885	0.819263	0.844736	0.816101	0.814542
31.925	0.855846	0.827684	0.845421	0.821326	0.850141			31.925	0.826793	0.834888	0.835011	0.819383	0.839214	0.813286	0.814778
31.975	0.857152	0.833952	0.840831	0.820211	0.850544			31.975	0.828697	0.835253	0.83486	0.820411	0.839487	0.818725	0.820149
32.025	0.857502	0.832729	0.844247	0.82215	0.851364			32.025	0.828805	0.83639	0.835248	0.822187	0.84179	0.815778	0.815688
32.075	0.858752	0.836077	0.843013	0.820098	0.849475			32.075	0.830488	0.836618	0.836536	0.821484	0.840035	0.816218	0.818969
32.125	0.859392	0.835779	0.847651	0.824261	0.849482			32.125	0.83286	0.837524	0.836631	0.822629	0.843159	0.818019	0.823999
32.175	0.859947	0.830941	0.843944	0.823912	0.850377			32.175	0.833276	0.836959	0.836735	0.821867	0.844355	0.819034	0.816124
32.225	0.85859	0.832253	0.843027	0.825731	0.851368			32.225	0.830696	0.837831	0.83782	0.825452	0.846962	0.815957	0.821503
32.275	0.859256	0.831232	0.846404	0.826731	0.851469			32.275	0.830588	0.838235	0.838323	0.826299	0.845494	0.82034	0.820367
32.325	0.861202	0.837037	0.844582	0.82538	0.851988			32.325	0.835529	0.838488	0.838244	0.827304	0.842762	0.823939	0.82429
32.375	0.860649	0.839066	0.844256	0.82788	0.852635			32.375	0.834717	0.839321	0.838636	0.825914	0.845888	0.820985	0.822873
32.425	0.860332	0.839263	0.844894	0.826076	0.851432			32.425	0.83328	0.839024	0.8397	0.827557	0.841876	0.820711	0.824134
32.475	0.862149	0.838361	0.845798	0.827722	0.853677			32.475	0.832684	0.840812	0.839737	0.82578	0.847798	0.823101	0.824542
32.525	0.861352	0.837707	0.849452	0.828573	0.852904			32.525	0.838433	0.84119	0.840652	0.829396	0.847433	0.822442	0.819005
32.575	0.862754	0.836342	0.849507	0.831614	0.852373			32.575	0.834385	0.840874	0.841791	0.829477	0.846277	0.821947	0.820342
32.625	0.862505	0.841446	0.847369	0.829067	0.855508			32.625	0.83843	0.841554	0.841216	0.826752	0.847324	0.829917	0.830597
32.675	0.862024	0.842192	0.848721	0.830027	0.85489			32.675	0.836638	0.841678	0.842342	0.830336	0.846676	0.823811	0.822507
32.725	0.862832	0.840916	0.847836	0.830358	0.854918			32.725	0.837737	0.842629	0.841519	0.831899	0.852684	0.825058	0.823262
32.775	0.863279	0.834989	0.848889	0.82913	0.853428			32.775	0.835767	0.842386	0.843283	0.831981	0.851165	0.826081	0.826225
32.825	0.864975	0.838069	0.852889	0.830321	0.854288			32.825	0.836636	0.843115	0.843095	0.830617	0.844074	0.82728	0.826319
32.875	0.865229	0.84058	0.852629	0.830597	0.854647			32.875	0.839122	0.843978	0.843824	0.834195	0.850869	0.833535	0.82857
32.925	0.863003	0.841463	0.846582	0.831989	0.854731			32.925	0.837778	0.844478	0.843575	0.831968	0.84885	0.825565	0.832467
32.975	0.863583	0.836286	0.846146	0.83271	0.856689			32.975	0.840151	0.844004	0.84452	0.832181	0.855753	0.82986	0.8242
33.025	0.866276	0.84033	0.85572	0.834435	0.857128			33.025	0.838383	0.844666	0.845654	0.832124	0.850771	0.831463	0.832269
33.075	0.865236	0.843366	0.853436	0.832761	0.857354			33.075	0.839961	0.84578	0.845332	0.831482	0.854855	0.830584	0.828826
33.125	0.864681	0.839144	0.850461	0.834526	0.856797			33.125	0.842038	0.845625	0.846267	0.834936	0.856508	0.829088	0.827427
33.175	0.866365	0.842046	0.855182	0.836358	0.855755			33.175	0.841766	0.845842	0.846269	0.834075	0.85341	0.833646	0.829062
33.225	0.865493	0.845188	0.850383	0.834842	0.858784			33.225	0.841297	0.846625	0.84654	0.833398	0.85289	0.831687	0.838124
33.275	0.865644	0.843344	0.852463	0.836264	0.857535			33.275	0.839979	0.846707	0.847197	0.834793	0.852264	0.836666	0.835566
33.325	0.866438	0.837006	0.849344	0.83589	0.85773			33.325	0.842167	0.847499	0.847974	0.834512	0.853772	0.832772	0.834627
33.375	0.867043	0.84735	0.85047	0.836814	0.85915			33.375	0.845924	0.848121	0.847897	0.836317	0.854336	0.834397	0.837234
33.425	0.867121	0.840317	0.853454	0.836792	0.859687			33.425	0.843606	0.848318	0.848494	0.83819	0.847663	0.835222	0.838214
33.475	0.866804	0.847884	0.854338	0.839618	0.861819			33.475	0.845347	0.847841	0.848819	0.835593	0.848779	0.837289	0.836562
33.525	0.869139	0.842497	0.854053	0.83967	0.860503			33.525	0.847045	0.849366	0.849424	0.838132	0.853295	0.836105	0.837939
33.575	0.869392	0.84501	0.854807	0.840231	0.861781			33.575	0.842707	0.849889	0.849144	0.838847	0.853826	0.839003	0.836306
33.625	0.868721	0.841721	0.851848	0.839769	0.860691			33.625	0.844535	0.849781	0.850001	0.838145	0.855	0.83621	0.836987
33.675	0.868908	0.845559	0.85657	0.840306	0.862678			33.675	0.844735	0.850546	0.850806	0.839622	0.855425	0.838679	0.837645
33.725	0.868441	0.850517	0.856701	0.840835	0.862487			33.725	0.845583	0.850685	0.851094	0.842139	0.854919	0.835678	0.836041
33.775	0.870143	0.848097	0.854973	0.842352	0.861342			33.775	0.847887	0.851019	0.851604	0.839627	0.854834	0.838432	0.837645
33.825	0.868435	0.848017	0.856367	0.843316	0.862257			33.825	0.846185	0.851596	0.851352	0.841334	0.857369	0.839765	0.842294
33.875	0.870444	0.846581	0.852021	0.84376	0.861749			33.875	0.848686	0.852629	0.853131	0.842574	0.862136	0.846641	0.834223
33.925	0.868934	0.847178	0.856697	0.844694	0.861592			33.925	0.847165	0.853173	0.852101	0.842316	0.854542	0.841195	0.842309
33.975	0.871913	0.847269	0.855462	0.841529	0.862974			33.975	0.846421	0.852866	0.853348	0.843764	0.852505	0.841006	0.846083
34.025	0.871761	0.85534	0.857512	0.845809	0.864443			34.025	0.848257	0.85342	0.853445	0.844236	0.859203	0.840497	0.837476
34.075	0.871508	0.849579	0.859605	0.845526	0.864995			34.075	0.849799	0.854222	0.853791	0.845005	0.854879	0.842465	0.843885
34.125	0.871146	0.8461	0.860402	0.847454	0.864143			34.125	0.850077	0.854607	0.854986	0.843015	0.857931	0.843828	0.843647
34.175	0.872474	0.847754	0.862397	0.845398	0.863757			34.175	0.852145	0.854678	0.85482	0.844833	0.857234	0.845202	0.842536
34.225	0.872979	0.851999	0.858413	0.848037	0.864099			34.225	0.852096	0.855129	0.85522	0.846339	0.859258	0.843258	0.843813
34.275	0.874616	0.851163	0.859822	0.848515	0.864861			34.275	0.852708	0.85594	0.855929	0.845023	0.857723	0.845796	0.846763
34.325	0.873833	0.84633	0.862163	0.849011	0.866598			34.325	0.850149	0.856403	0.855652	0.845635	0.858619	0.848448	0.849443
34.375	0.872904	0.845579	0.863353	0.847882	0.865395			34.375	0.852232	0.856984	0.856388	0.848499	0.858535	0.850252	0.848849
34.425	0.875717	0.851308	0.859926	0.847868	0.865962			34.425	0.852026	0.856595	0.857262	0.848617	0.859937	0.84749	0.846919
34.475	0.875312	0.850273	0.860062	0.851609	0.864971			34.475	0.854176	0.858014	0.857585	0.848794	0.86476	0.851668	0.844834
34.525	0.873845	0.854807	0.862038	0.850553	0.868599			34.525	0.853482	0.857048	0.857985	0.847908	0.860535	0.847543	0.849887
34.575	0.875522	0.851015	0.864201	0.850112	0.866156			34.575	0.854564	0.858534	0.858142	0.848242	0.859863	0.852486	0.852026
34.625	0.876158	0.852226	0.86472	0.85083	0.867455			34.625	0.856704	0.85839	0.857933	0.848267	0.859971	0.851118	0.850003
34.675	0.874588	0.852157	0.863873	0.851826	0.866839			34.675	0.853935	0.859144	0.858993	0.851	0.86048	0.85009	0.85095
34.725	0.875379	0.857759	0.862441	0.850891	0.868439			34.725	0.853293	0.858819	0.858791	0.852713	0.860311	0.847719	0.846937
34.775	0.876727	0.856782	0.862183	0.854674	0.869991			34.775	0.856346	0.859991	0.859897	0.85026	0.861377	0.85119	0.851568
34.825	0.876564	0.853417	0.867677	0.851686	0.869898			34.825	0.854678	0.860291	0.860702	0.854635	0.863991	0.849366	0.852757
34.875	0.875938	0.856529	0.860369	0.853496	0.870106			34.875	0.856621	0.860662	0.861151	0.853056	0.860995	0.852813	0.850878
34.925	0.876766	0.85579	0.864765	0.85464	0.870854			34.925	0.857947	0.861265	0.861451	0.853783	0.864258	0.853414	0.853031
34.975	0.877068	0.852064	0.864506	0.852789	0.870528			34.975	0.856385	0.861724	0.860814	0.852314	0.867213	0.858177	0.855377
35.025	0.877756	0.852522	0.867823	0.855131	0.871315			35.025	0.857163	0.862216	0.861719	0.853252	0.867515	0.848323	0.856602
35.075	0.878011	0.858657	0.867774	0.852185	0.870181			35.075	0.860543	0.862267	0.862341	0.854069	0.866071	0.857958	0.853313
35.125	0.878964	0.858586	0.863563	0.855928	0.871047			35.125	0.859733	0.862567	0.862169	0.854736	0.864325	0.858293	0.857662
35.175	0.877828	0.861387	0.865472	0.856602	0.872581			35.175	0.855501	0.863126	0.863361	0.854368	0.866438	0.855988	0.852391
35.225	0.877794	0.854371	0.861307	0.857968	0.873238			35.225	0.862946	0.863352	0.863631	0.855422	0.862026	0.851677	0.854681
35.275	0.879607	0.861345	0.869359	0.85683	0.871095			35.275	0.856266	0.863456	0.863944	0.855052	0.868002	0.856256	0.858692
35.325	0.879787	0.865678	0.866339	0.857876	0.873471			35.325	0.860577	0.864375	0.864189	0.857785	0.865717	0.859176	0.859683
35.375	0.880744	0.856691	0.869533	0.857285	0.872005			35.375	0.858908	0.8646	0.864268	0.858433	0.872311	0.856296	0.860628
35.425	0.880896	0.86106	0.869335	0.858026	0.871702			35.425	0.859606	0.865476	0.865664	0.858844	0.871952	0.856215	0.862739
35.475	0.880367	0.862543	0.868491	0.85732	0.871825			35.475	0.860974	0.86568	0.864961	0.857742	0.866707	0.855652	0.864653
35.525	0.883259	0.865275	0.867414	0.860305	0.874767			35.525	0.863043	0.866921	0.866071	0.858412	0.86755	0.859971	0.86106
35.575	0.88129	0.86138	0.873698	0.860965	0.874444			35.575	0.861964	0.866052	0.866558	0.858582	0.867854	0.859473	0.858322
35.625	0.881186	0.855792	0.871854	0.862303	0.874384			35.625	0.862923	0.867768	0.866482	0.860626	0.866145	0.864754	0.861774
35.675	0.882733	0.858457	0.870637	0.862733	0.876016			35.675	0.865119	0.867197	0.867329	0.863231	0.867161	0.862346	0.861936
35.725	0.882136	0.859467	0.869466	0.860893	0.875325			35.725	0.863902	0.867695	0.867551	0.859121	0.86987	0.86515	0.857092
35.775	0.882688	0.862776	0.870783	0.862253	0.875284			35.775	0.866588	0.867631	0.86761	0.861429	0.869779	0.864715	0.860573
35.825	0.882435	0.867583	0.870077	0.861898	0.876576			35.825	0.866953	0.868931	0.868054	0.862774	0.870527	0.861875	0.861725
35.875	0.883127	0.866351	0.871634	0.862648	0.874804			35.875	0.861349	0.868946	0.869557	0.864344	0.872734	0.858165	0.860976
35.925	0.884374	0.868518	0.871982	0.864789	0.877802			35.925	0.864241	0.869813	0.869877	0.864068	0.868625	0.86535	0.86276
35.975	0.882726	0.864981	0.870988	0.865257	0.876316			35.975	0.867111	0.869723	0.869643	0.862199	0.869475	0.863335	0.864545
36.025	0.885035	0.863386	0.875287	0.866864	0.876317			36.025	0.866348	0.870486	0.869592	0.865055	0.868498	0.869852	0.866021
36.075	0.884894	0.863749	0.866108	0.866168	0.876636			36.075	0.86431	0.870244	0.870594	0.86435	0.875407	0.86213	0.865726
36.125	0.88399	0.861454	0.871359	0.865829	0.878046			36.125	0.864595	0.871434	0.870719	0.86606	0.87069	0.870159	0.86477
36.175	0.884427	0.865981	0.870395	0.863792	0.879396			36.175	0.865179	0.871483	0.870842	0.863981	0.875496	0.861716	0.863563
36.225	0.88744	0.866523	0.868025	0.86717	0.879191			36.225	0.869222	0.871648	0.871612	0.864648	0.875054	0.865438	0.864203
36.275	0.886658	0.86566	0.875921	0.867927	0.880073			36.275	0.869294	0.87237	0.872455	0.866295	0.874721	0.868016	0.866353
36.325	0.887323	0.871617	0.876312	0.867115	0.880159			36.325	0.8672	0.87241	0.872014	0.865392	0.875011	0.867696	0.867411
36.375	0.886292	0.867863	0.872	0.866967	0.879717			36.375	0.86954	0.873323	0.872985	0.864367	0.875483	0.870718	0.870282
36.425	0.886057	0.868826	0.872962	0.869554	0.88094			36.425	0.86871	0.873465	0.872898	0.868545	0.874613	0.866638	0.867825
36.475	0.886684	0.863255	0.87469	0.868506	0.880218			36.475	0.868212	0.873301	0.873997	0.867602	0.872315	0.871518	0.867691
36.525	0.886699	0.865043	0.874073	0.8694	0.88201			36.525	0.870885	0.874682	0.874627	0.868113	0.875663	0.873383	0.868598
36.575	0.885992	0.870832	0.878195	0.869448	0.882062			36.575	0.871419	0.873985	0.874194	0.870568	0.875951	0.872653	0.872845
36.625	0.887901	0.866828	0.872399	0.871323	0.881071			36.625	0.87135	0.874895	0.874913	0.868046	0.873064	0.871016	0.873228
36.675	0.88899	0.869797	0.874362	0.871312	0.883314			36.675	0.878412	0.875331	0.875103	0.870817	0.877145	0.869569	0.868949
36.725	0.887245	0.867786	0.876525	0.871365	0.882594			36.725	0.871916	0.876301	0.875817	0.86943	0.880701	0.868275	0.870462
36.775	0.888621	0.868191	0.877871	0.87129	0.879651			36.775	0.872083	0.875824	0.87665	0.870091	0.874179	0.87549	0.8722
36.825	0.889302	0.867111	0.876861	0.869165	0.883205			36.825	0.872888	0.876294	0.876287	0.869977	0.875149	0.872041	0.869873
36.875	0.889324	0.873005	0.882702	0.872106	0.883405			36.875	0.874684	0.876901	0.876593	0.871264	0.875707	0.875772	0.869354
36.925	0.89023	0.868919	0.877593	0.873551	0.883201			36.925	0.874013	0.877569	0.8778	0.873756	0.880963	0.873899	0.875793
36.975	0.890635	0.871152	0.879296	0.873756	0.882015			36.975	0.87345	0.877908	0.877615	0.87375	0.873679	0.872134	0.875503
37.025	0.889458	0.864753	0.876451	0.873118	0.884889			37.025	0.875316	0.878342	0.878282	0.872699	0.882248	0.87137	0.872913
37.075	0.890478	0.874933	0.878861	0.873689	0.885431			37.075	0.873993	0.878647	0.878258	0.874741	0.878021	0.876456	0.873571
37.125	0.889968	0.87214	0.881588	0.873689	0.885665			37.125	0.87705	0.879814	0.87954	0.871952	0.876101	0.872794	0.876203
37.175	0.890603	0.871495	0.879526	0.876781	0.885377			37.175	0.876073	0.88016	0.879149	0.874492	0.880286	0.872701	0.880633
37.225	0.891109	0.874974	0.879133	0.874298	0.884468			37.225	0.876839	0.880512	0.880167	0.875219	0.880357	0.876042	0.877105
37.275	0.891125	0.871343	0.876756	0.876716	0.88467			37.275	0.87622	0.880063	0.879948	0.875826	0.881294	0.879526	0.882531
37.325	0.890749	0.879915	0.879442	0.876098	0.885106			37.325	0.875437	0.880939	0.880686	0.874871	0.878648	0.881858	0.879787
37.375	0.892301	0.875026	0.882499	0.876462	0.886696			37.375	0.87819	0.880451	0.880499	0.876382	0.880812	0.877363	0.872682
37.425	0.892362	0.876573	0.879495	0.878935	0.886384			37.425	0.876529	0.881563	0.881539	0.875609	0.877087	0.883323	0.879989
37.475	0.893071	0.877756	0.878793	0.878386	0.886693			37.475	0.878889	0.88216	0.882095	0.879212	0.88586	0.880133	0.878294
37.525	0.893826	0.877604	0.880106	0.879913	0.886126			37.525	0.876265	0.88186	0.882829	0.877608	0.880408	0.883454	0.881372
37.575	0.894132	0.874812	0.883987	0.878685	0.887351			37.575	0.878735	0.882383	0.883212	0.877315	0.877838	0.87969	0.880617
37.625	0.894242	0.87669	0.882081	0.879454	0.887518			37.625	0.87665	0.882453	0.883231	0.878739	0.878418	0.882522	0.88117
37.675	0.895192	0.87962	0.88322	0.879876	0.887698			37.675	0.881049	0.882864	0.88335	0.878001	0.879562	0.88322	0.879633
37.725	0.893929	0.878554	0.882231	0.879376	0.890221			37.725	0.880414	0.883552	0.883451	0.87994	0.884572	0.876415	0.879754
37.775	0.89468	0.878049	0.884075	0.878502	0.889344			37.775	0.879999	0.88397	0.883833	0.879964	0.886116	0.884191	0.885205
37.825	0.894008	0.88268	0.883583	0.878777	0.88861			37.825	0.880727	0.884334	0.885178	0.879091	0.884322	0.880971	0.884313
37.875	0.894989	0.874644	0.888663	0.882143	0.890659			37.875	0.880193	0.885243	0.884743	0.881366	0.882042	0.88452	0.880562
37.925	0.897667	0.876141	0.882898	0.884147	0.890045			37.925	0.880477	0.88589	0.885485	0.882585	0.884488	0.886239	0.883514
37.975	0.896455	0.884427	0.882536	0.881841	0.889852			37.975	0.881194	0.885781	0.885537	0.882456	0.883227	0.882509	0.884325
38.025	0.896004	0.88482	0.885774	0.884111	0.891364			38.025	0.880061	0.885615	0.886198	0.879545	0.885029	0.881767	0.887714
38.075	0.897512	0.883938	0.884293	0.882264	0.891534			38.075	0.883426	0.886308	0.886109	0.88391	0.884407	0.886515	0.885542
38.125	0.89691	0.879381	0.884843	0.884653	0.891235			38.125	0.882719	0.887226	0.88677	0.882449	0.884276	0.882465	0.884279
38.175	0.896208	0.883696	0.890581	0.881847	0.890996			38.175	0.887508	0.886301	0.886887	0.885228	0.887249	0.886174	0.884509
38.225	0.898655	0.880558	0.883942	0.886031	0.892036			38.225	0.883621	0.887319	0.888352	0.883583	0.89175	0.888621	0.889172
38.275	0.898119	0.883256	0.889956	0.882977	0.890943			38.275	0.886396	0.887408	0.887548	0.883546	0.889421	0.890351	0.889295
38.325	0.897411	0.880935	0.887846	0.885311	0.892073			38.325	0.88665	0.888388	0.888105	0.884044	0.886368	0.884538	0.884046
38.375	0.898213	0.883752	0.886811	0.884504	0.893588			38.375	0.885623	0.888549	0.888486	0.887424	0.887352	0.887763	0.887477
38.425	0.89856	0.883565	0.891301	0.885155	0.891864			38.425	0.886528	0.888687	0.889502	0.88625	0.888636	0.88729	0.889318
38.475	0.898661	0.887989	0.887835	0.887266	0.893496			38.475	0.887666	0.889031	0.889738	0.886984	0.886959	0.888326	0.894332
38.525	0.899279	0.884815	0.887508	0.888215	0.894048			38.525	0.884481	0.889963	0.890207	0.886947	0.891155	0.888563	0.891562
38.575	0.898621	0.88652	0.888685	0.886733	0.892918			38.575	0.888145	0.890687	0.89078	0.884797	0.89054	0.889357	0.889492
38.625	0.899907	0.878987	0.890685	0.888877	0.894185			38.625	0.886528	0.89078	0.890674	0.887464	0.890183	0.88751	0.891948
38.675	0.899695	0.884586	0.887879	0.888884	0.89391			38.675	0.888118	0.891069	0.890952	0.886238	0.893246	0.892527	0.894872
38.725	0.900849	0.886645	0.892173	0.888402	0.894508			38.725	0.888597	0.890748	0.89161	0.888443	0.891367	0.892404	0.889882
38.775	0.900996	0.888517	0.886868	0.88853	0.895581			38.775	0.888557	0.892616	0.892252	0.889524	0.889988	0.893003	0.891931
38.825	0.901835	0.891096	0.893283	0.888729	0.897355			38.825	0.886505	0.892241	0.891906	0.889766	0.89208	0.889343	0.891208
38.875	0.901544	0.886706	0.893327	0.888066	0.897187			38.875	0.890656	0.892105	0.892426	0.891106	0.891337	0.890238	0.889645
38.925	0.901856	0.883087	0.892879	0.889874	0.897029			38.925	0.891317	0.892772	0.892694	0.890072	0.892235	0.893169	0.890467
38.975	0.901212	0.890092	0.890576	0.894541	0.89674			38.975	0.888701	0.893635	0.893813	0.890197	0.894527	0.893501	0.895563
39.025	0.901739	0.885972	0.891262	0.890939	0.896006			39.025	0.893622	0.893209	0.893527	0.892414	0.889296	0.89384	0.892536
39.075	0.90205	0.887719	0.893962	0.891037	0.897582			39.075	0.890424	0.893449	0.894141	0.890169	0.890701	0.892178	0.897198
39.125	0.903393	0.89368	0.895183	0.892313	0.896295			39.125	0.893395	0.894648	0.894751	0.892373	0.892128	0.891036	0.892113
39.175	0.902716	0.898534	0.891449	0.892366	0.897683			39.175	0.891497	0.895154	0.894728	0.893539	0.892797	0.894491	0.897248
39.225	0.903081	0.891941	0.891749	0.892537	0.898796			39.225	0.891586	0.895289	0.895156	0.893732	0.896383	0.896373	0.894742
39.275	0.90362	0.89172	0.891996	0.894266	0.898159			39.275	0.892105	0.895787	0.895603	0.892137	0.898287	0.894234	0.898069
39.325	0.902882	0.891124	0.895347	0.895751	0.89826			39.325	0.891808	0.896	0.895428	0.892382	0.894779	0.899139	0.892726
39.375	0.903363	0.890404	0.893717	0.895465	0.899214			39.375	0.895209	0.895608	0.896673	0.893286	0.891684	0.895876	0.898197
39.425	0.903506	0.892044	0.894381	0.895851	0.900335			39.425	0.894559	0.89641	0.896905	0.893013	0.895658	0.897659	0.898083
39.475	0.904311	0.89057	0.895753	0.894464	0.899464			39.475	0.894347	0.896932	0.896891	0.895452	0.891015	0.898113	0.895028
39.525	0.903384	0.888433	0.895309	0.894175	0.900746			39.525	0.891472	0.897956	0.897334	0.893481	0.895405	0.898914	0.901106
39.575	0.904063	0.890723	0.896806	0.895386	0.899814			39.575	0.894323	0.898428	0.897666	0.897365	0.894236	0.900023	0.898333
39.625	0.906113	0.889116	0.897033	0.896647	0.902392			39.625	0.894515	0.898438	0.898173	0.896739	0.895603	0.900844	0.893811
39.675	0.906318	0.890497	0.897623	0.897047	0.902099			39.675	0.896428	0.8981	0.898721	0.895225	0.894608	0.901426	0.898156
39.725	0.906645	0.897989	0.897323	0.897933	0.902139			39.725	0.895602	0.898809	0.899278	0.89939	0.898502	0.899953	0.896152
39.775	0.906463	0.89568	0.895433	0.90043	0.903309			39.775	0.898688	0.899336	0.899244	0.899269	0.89664	0.902178	0.898467
39.825	0.906128	0.895026	0.90144	0.898911	0.901316			39.825	0.897557	0.89952	0.899556	0.897592	0.894944	0.89847	0.903932
39.875	0.907831	0.888343	0.895958	0.897034	0.90302			39.875	0.894359	0.900054	0.900172	0.900002	0.899712	0.902496	0.900452
39.925	0.906388	0.898856	0.897167	0.899247	0.904165			39.925	0.898598	0.900611	0.899674	0.899214	0.897735	0.899513	0.901191
39.975	0.908442	0.891021	0.901302	0.90142	0.903077			39.975	0.896285	0.90085	0.900696	0.899407	0.897606	0.902691	0.902285
40.025	0.908201	0.895013	0.899832	0.901192	0.903842			40.025	0.900089	0.901365	0.901271	0.897377	0.898228	0.902501	0.902547
40.075	0.908544	0.895809	0.89707	0.899632	0.902555			40.075	0.899291	0.901673	0.901811	0.898275	0.897117	0.903717	0.905263
40.125	0.910465	0.893219	0.900578	0.900476	0.902147			40.125	0.898575	0.90125	0.902036	0.901693	0.899341	0.904731	0.904117
40.175	0.908077	0.894784	0.902286	0.903206	0.903736			40.175	0.900232	0.902153	0.902089	0.899559	0.898891	0.898254	0.907037
40.225	0.910091	0.901917	0.90333	0.900175	0.905535			40.225	0.901224	0.902371	0.902211	0.902639	0.903394	0.903232	0.900018
40.275	0.908058	0.897689	0.901444	0.901856	0.905213			40.275	0.903161	0.903928	0.902462	0.901869	0.898252	0.903153	0.903932
40.325	0.908874	0.896114	0.900528	0.903139	0.905203			40.325	0.900392	0.90285	0.903144	0.902578	0.902906	0.904277	0.906102
40.375	0.909789	0.900325	0.900793	0.90121	0.905701			40.375	0.899319	0.903676	0.903773	0.902474	0.898906	0.906892	0.903336
40.425	0.910542	0.899604	0.899466	0.902754	0.906005			40.425	0.901467	0.903985	0.903535	0.902074	0.90163	0.907755	0.900885
40.475	0.910852	0.901341	0.90363	0.905252	0.906786			40.475	0.903366	0.904023	0.903815	0.901801	0.901269	0.904882	0.90425
40.525	0.911501	0.903325	0.90642	0.905338	0.907376			40.525	0.90327	0.904389	0.904323	0.905305	0.903304	0.9071	0.906782
40.575	0.910449	0.901642	0.904037	0.904719	0.907128			40.575	0.905737	0.905438	0.905718	0.903966	0.905793	0.909432	0.908164
40.625	0.910744	0.903478	0.905055	0.904809	0.907282			40.625	0.903516	0.905494	0.905468	0.905526	0.902666	0.909132	0.902218
40.675	0.911102	0.897223	0.904616	0.906325	0.906646			40.675	0.902498	0.905451	0.905211	0.904809	0.904446	0.907357	0.910086
40.725	0.912261	0.900413	0.904131	0.903935	0.907532			40.725	0.902801	0.906062	0.906878	0.9054	0.908935	0.908598	0.910155
40.775	0.91354	0.895314	0.903956	0.906584	0.908233			40.775	0.903801	0.906777	0.906494	0.904341	0.905319	0.906955	0.908723
40.825	0.912801	0.897919	0.905897	0.907592	0.908526			40.825	0.904509	0.906846	0.906346	0.907453	0.903008	0.905641	0.910086
40.875	0.912573	0.903131	0.903666	0.907048	0.909335			40.875	0.906035	0.907849	0.907364	0.906406	0.902658	0.907905	0.909621
40.925	0.911986	0.905371	0.905133	0.905498	0.908873			40.925	0.905165	0.907315	0.907005	0.908533	0.904067	0.908395	0.906721
40.975	0.913481	0.901052	0.906517	0.907437	0.909074			40.975	0.904362	0.908629	0.907808	0.908717	0.90736	0.907482	0.911088
41.025	0.914654	0.907573	0.907312	0.907366	0.909964			41.025	0.905792	0.90819	0.907898	0.906666	0.910805	0.912024	0.91093
41.075	0.912772	0.900529	0.90666	0.908578	0.910799			41.075	0.907442	0.907914	0.908644	0.90776	0.906301	0.910315	0.911439
41.125	0.913834	0.90686	0.90537	0.909804	0.912738			41.125	0.909054	0.909017	0.90863	0.907741	0.906487	0.910296	0.913258
41.175	0.914803	0.906612	0.90929	0.910705	0.910533			41.175	0.90823	0.909341	0.90964	0.910024	0.908107	0.911981	0.911981
41.225	0.914006	0.90574	0.905683	0.910564	0.910646			41.225	0.909675	0.909672	0.909539	0.910616	0.905194	0.9115	0.914388
41.275	0.914947	0.908505	0.908271	0.90998	0.91218			41.275	0.909274	0.91	0.910503	0.908858	0.908618	0.911534	0.914055
41.325	0.915405	0.900999	0.906618	0.911381	0.910883			41.325	0.908681	0.910413	0.9109	0.911094	0.908878	0.910938	0.910064
41.375	0.915378	0.905274	0.909178	0.911261	0.910811			41.375	0.911355	0.911139	0.911156	0.91243	0.909527	0.911215	0.911766
41.425	0.915876	0.907141	0.906208	0.912671	0.913781			41.425	0.909891	0.910883	0.911378	0.911428	0.911591	0.913761	0.914769
41.475	0.915912	0.906823	0.910014	0.910398	0.913667			41.475	0.909916	0.911269	0.910948	0.913141	0.910612	0.914465	0.911516
41.525	0.914906	0.906378	0.90868	0.911548	0.912998			41.525	0.912774	0.912189	0.910961	0.9137	0.909445	0.915111	0.915509
41.575	0.916112	0.90725	0.906543	0.911998	0.913659			41.575	0.910342	0.911922	0.911986	0.912846	0.909094	0.915142	0.910543
41.625	0.916259	0.905373	0.910134	0.91274	0.913964			41.625	0.911452	0.912522	0.912147	0.912191	0.911601	0.911396	0.916687
41.675	0.917747	0.913737	0.91297	0.91332	0.913777			41.675	0.912301	0.912781	0.912997	0.912274	0.907801	0.918063	0.915759
41.725	0.916316	0.906933	0.90711	0.914133	0.914052			41.725	0.910226	0.912724	0.913679	0.913362	0.913892	0.91709	0.914912
41.775	0.917857	0.909619	0.913716	0.914615	0.915345			41.775	0.909002	0.913733	0.913561	0.915819	0.914004	0.913967	0.918039
41.825	0.91748	0.908349	0.909032	0.913442	0.91576			41.825	0.912632	0.914047	0.913798	0.915538	0.911007	0.916463	0.916662
41.875	0.919367	0.906964	0.91472	0.915936	0.91587			41.875	0.913023	0.914757	0.914068	0.915075	0.910818	0.919268	0.914949
41.925	0.917602	0.909562	0.911781	0.915865	0.917168			41.925	0.91717	0.914615	0.914397	0.915144	0.912215	0.915889	0.914941
41.975	0.920089	0.905712	0.912651	0.915277	0.916281			41.975	0.914875	0.914335	0.915171	0.917119	0.912261	0.918417	0.918287
42.025	0.918262	0.9102	0.913661	0.916412	0.915836			42.025	0.91369	0.915609	0.91527	0.913976	0.913603	0.918758	0.916472
42.075	0.919272	0.914626	0.91354	0.916456	0.915781			42.075	0.910456	0.915636	0.915464	0.915783	0.914897	0.920502	0.917093
42.125	0.919625	0.908214	0.913656	0.917364	0.916485			42.125	0.916342	0.916327	0.916272	0.916484	0.912181	0.917137	0.918654
42.175	0.918864	0.912595	0.912661	0.916478	0.916653			42.175	0.916796	0.915816	0.916724	0.918737	0.909448	0.915926	0.918042
42.225	0.920565	0.911706	0.913027	0.916428	0.917289			42.225	0.915544	0.916886	0.91605	0.917941	0.913251	0.920892	0.918155
42.275	0.919931	0.911134	0.915035	0.919706	0.916908			42.275	0.916533	0.916706	0.917144	0.918425	0.914455	0.916993	0.919571
42.325	0.920206	0.907664	0.916075	0.91851	0.918164			42.325	0.916227	0.917642	0.917428	0.917911	0.916294	0.922731	0.921729
42.375	0.921359	0.91559	0.91219	0.91863	0.919247			42.375	0.91727	0.917479	0.918173	0.92105	0.915651	0.921187	0.921514
42.425	0.921129	0.911243	0.916169	0.919309	0.917297			42.425	0.916882	0.917853	0.91832	0.921244	0.913662	0.920447	0.918971
42.475	0.922916	0.909898	0.916351	0.918791	0.919381			42.475	0.915371	0.918386	0.91837	0.919817	0.917493	0.926727	0.919469
42.525	0.922557	0.920248	0.916852	0.919648	0.917518			42.525	0.916472	0.919034	0.919072	0.920235	0.919575	0.918341	0.922017
42.575	0.922497	0.909683	0.921535	0.920484	0.918386			42.575	0.919589	0.918589	0.919219	0.920973	0.91733	0.918489	0.919904
42.625	0.922919	0.913591	0.918093	0.919712	0.920148			42.625	0.918396	0.919504	0.919593	0.920089	0.916456	0.920458	0.922086
42.675	0.923894	0.90989	0.920005	0.92049	0.920867			42.675	0.918676	0.919829	0.919503	0.920907	0.915468	0.922627	0.92224
42.725	0.924	0.916476	0.918063	0.920499	0.921099			42.725	0.919746	0.920227	0.919759	0.920897	0.917905	0.922165	0.92536
42.775	0.92266	0.916512	0.920025	0.920365	0.920974			42.775	0.920235	0.920658	0.920531	0.921099	0.917071	0.922332	0.926491
42.825	0.924857	0.910912	0.920477	0.922042	0.920695			42.825	0.918824	0.920954	0.920907	0.921627	0.917642	0.923955	0.926661
42.875	0.924259	0.91189	0.915727	0.922237	0.921493			42.875	0.920196	0.920714	0.920792	0.920846	0.916168	0.928377	0.924127
42.925	0.923612	0.915701	0.919268	0.923051	0.921132			42.925	0.919195	0.921478	0.921414	0.922374	0.922534	0.925778	0.925022
42.975	0.924309	0.913148	0.91796	0.923384	0.921966			42.975	0.922759	0.921947	0.921518	0.923171	0.919812	0.92656	0.923312
43.025	0.925909	0.911212	0.921675	0.923079	0.920998			43.025	0.921216	0.921623	0.921627	0.921949	0.919452	0.922671	0.927366
43.075	0.924833	0.917552	0.924108	0.92364	0.922205			43.075	0.919761	0.922446	0.922795	0.924848	0.919536	0.925525	0.928215
43.125	0.923906	0.919673	0.922151	0.922345	0.921702			43.125	0.921848	0.922892	0.922623	0.92466	0.918099	0.923331	0.923395
43.175	0.926882	0.920101	0.921361	0.925094	0.923623			43.175	0.919628	0.923246	0.92293	0.922913	0.920226	0.930036	0.924839
43.225	0.924555	0.915827	0.919014	0.924097	0.925125			43.225	0.923541	0.923701	0.92266	0.927323	0.922873	0.929322	0.926009
43.275	0.926222	0.923078	0.919998	0.925044	0.923777			43.275	0.924885	0.92372	0.923358	0.923967	0.923144	0.924971	0.924931
43.325	0.925113	0.919507	0.923803	0.925657	0.92473			43.325	0.923901	0.923759	0.924009	0.925301	0.920612	0.931043	0.925798
43.375	0.926981	0.924098	0.920481	0.926946	0.923001			43.375	0.921514	0.924605	0.924271	0.92449	0.925153	0.926108	0.928493
43.425	0.92614	0.923822	0.922401	0.927209	0.924601			43.425	0.924456	0.925043	0.925369	0.926066	0.921786	0.92608	0.92691
43.475	0.927729	0.917323	0.924463	0.926812	0.925664			43.475	0.925346	0.924797	0.925774	0.92678	0.92321	0.931034	0.930773
43.525	0.92646	0.91555	0.92329	0.926308	0.926401			43.525	0.926437	0.92551	0.925376	0.925865	0.926705	0.929327	0.928263
43.575	0.927953	0.920561	0.922019	0.927826	0.924347			43.575	0.925186	0.925382	0.925406	0.926837	0.923408	0.926872	0.927755
43.625	0.927394	0.921657	0.920527	0.927977	0.925851			43.625	0.923778	0.926339	0.925562	0.926651	0.922144	0.930715	0.926563
43.675	0.927376	0.913492	0.922047	0.927054	0.924599			43.675	0.925948	0.926434	0.926314	0.929647	0.924283	0.926142	0.933713
43.725	0.926543	0.921994	0.924649	0.928061	0.926503			43.725	0.925248	0.926789	0.926357	0.926305	0.92323	0.93267	0.932776
43.775	0.927921	0.923731	0.927659	0.92989	0.92912			43.775	0.9283	0.926918	0.926585	0.931334	0.9259	0.928195	0.928711
43.825	0.928534	0.922676	0.922726	0.929469	0.925818			43.825	0.929061	0.92737	0.92772	0.927808	0.924364	0.929668	0.932929
43.875	0.929011	0.92208	0.923068	0.928362	0.927887			43.875	0.924418	0.927565	0.92795	0.930084	0.925377	0.93109	0.926623
43.925	0.929199	0.922694	0.925172	0.930315	0.927362			43.925	0.92713	0.928466	0.927838	0.929335	0.92525	0.933143	0.929313
43.975	0.928695	0.922039	0.92715	0.930234	0.928544			43.975	0.92867	0.928741	0.928388	0.931068	0.923872	0.932334	0.932131
44.025	0.92982	0.919011	0.927515	0.930799	0.927793			44.025	0.931115	0.928848	0.929031	0.930427	0.923164	0.931252	0.934796
44.075	0.929151	0.922343	0.928654	0.931101	0.928711			44.075	0.926618	0.928517	0.928764	0.930501	0.929506	0.932007	0.931474
44.125	0.929928	0.926907	0.924099	0.930275	0.928724			44.125	0.929369	0.929246	0.928895	0.930257	0.927651	0.931481	0.932661
44.175	0.931116	0.922804	0.927453	0.931856	0.929304			44.175	0.929364	0.929496	0.929376	0.931563	0.927108	0.930772	0.932044
44.225	0.932356	0.921027	0.924612	0.933021	0.92982			44.225	0.929589	0.929569	0.929433	0.932052	0.927689	0.935485	0.929759
44.275	0.930417	0.922893	0.923335	0.932475	0.92977			44.275	0.93197	0.93029	0.930089	0.931532	0.930538	0.932052	0.929366
44.325	0.931208	0.921749	0.926384	0.93373	0.931072			44.325	0.931604	0.930231	0.930323	0.933208	0.929548	0.932374	0.932942
44.375	0.930121	0.92563	0.932195	0.933532	0.930047			44.375	0.927886	0.930404	0.930838	0.933108	0.928965	0.93405	0.931009
44.425	0.931725	0.922713	0.930713	0.932453	0.929204			44.425	0.931575	0.93098	0.931363	0.932946	0.927254	0.93045	0.933703
44.475	0.930968	0.926049	0.927059	0.932387	0.932211			44.475	0.930789	0.930986	0.931515	0.9325	0.932511	0.933535	0.932429
44.525	0.931721	0.926908	0.926257	0.933738	0.930291			44.525	0.932154	0.931982	0.931873	0.935201	0.929797	0.934077	0.935264
44.575	0.932477	0.927042	0.927008	0.934347	0.930916			44.575	0.931516	0.931843	0.932001	0.933637	0.927436	0.936191	0.933831
44.625	0.932363	0.925635	0.930456	0.935685	0.932417			44.625	0.935129	0.932648	0.932648	0.933476	0.929984	0.937975	0.935096
44.675	0.93187	0.926028	0.92895	0.934885	0.931277			44.675	0.93255	0.932058	0.932287	0.935223	0.930429	0.934633	0.934817
44.725	0.934169	0.928985	0.931866	0.933327	0.932712			44.725	0.934741	0.933031	0.932625	0.934584	0.928927	0.932449	0.938638
44.775	0.933373	0.928536	0.928491	0.934226	0.932171			44.775	0.934083	0.932723	0.933183	0.934768	0.930156	0.936168	0.935561
44.825	0.933954	0.927217	0.929118	0.936914	0.932044			44.825	0.935769	0.933961	0.933305	0.934464	0.929538	0.936159	0.93837
44.875	0.933549	0.931414	0.93008	0.933824	0.932845			44.875	0.933667	0.934226	0.934015	0.935743	0.928986	0.933219	0.937053
44.925	0.934832	0.932017	0.931915	0.937114	0.93326			44.925	0.933661	0.934502	0.93419	0.938391	0.928471	0.936484	0.937355
44.975	0.934721	0.927209	0.933426	0.937584	0.933409			44.975	0.932542	0.934455	0.934422	0.937093	0.93327	0.937866	0.937431
45.025	0.933298	0.926208	0.933905	0.935688	0.933544			45.025	0.936904	0.934754	0.934403	0.936292	0.931811	0.939176	0.940626
45.075	0.935457	0.928596	0.930482	0.937334	0.934156			45.075	0.935218	0.935004	0.935113	0.937331	0.930242	0.938122	0.933669
45.125	0.935034	0.930573	0.932921	0.938123	0.934059			45.125	0.935541	0.935055	0.935603	0.936293	0.93345	0.934618	0.937978
45.175	0.934573	0.930177	0.931705	0.937869	0.93333			45.175	0.936715	0.935935	0.935588	0.937907	0.931025	0.941637	0.939667
45.225	0.93449	0.932621	0.935844	0.937118	0.935847			45.225	0.93761	0.936098	0.935715	0.937294	0.934448	0.94145	0.942019
45.275	0.936422	0.928947	0.931028	0.938636	0.935796			45.275	0.937568	0.936345	0.936711	0.936825	0.933732	0.936468	0.937536
45.325	0.935636	0.935357	0.935437	0.940165	0.93551			45.325	0.937023	0.9368	0.936498	0.939174	0.931148	0.941067	0.937773
45.375	0.936051	0.935111	0.92855	0.939645	0.935499			45.375	0.937877	0.937263	0.936538	0.939442	0.934644	0.940582	0.938358
45.425	0.936169	0.929925	0.929772	0.938775	0.934851			45.425	0.938391	0.937042	0.937087	0.939781	0.936712	0.943168	0.938127
45.475	0.937616	0.934092	0.935138	0.939667	0.936318			45.475	0.937756	0.937266	0.937248	0.940308	0.933159	0.942269	0.941272
45.525	0.936059	0.93006	0.935289	0.940054	0.936419			45.525	0.937397	0.937872	0.937985	0.940742	0.93509	0.939727	0.94096
45.575	0.937209	0.928536	0.93464	0.939261	0.937201			45.575	0.938958	0.938014	0.938268	0.942138	0.935433	0.93984	0.940268
45.625	0.937785	0.931688	0.938759	0.942011	0.936511			45.625	0.937855	0.938342	0.938442	0.942062	0.935618	0.944974	0.942545
45.675	0.937491	0.933008	0.935687	0.940701	0.939351			45.675	0.940363	0.938465	0.938703	0.939783	0.935645	0.941668	0.940781
45.725	0.938432	0.933708	0.936438	0.940473	0.938227			45.725	0.942295	0.938923	0.939248	0.941021	0.934877	0.944612	0.940184
45.775	0.938257	0.933669	0.933944	0.943979	0.938924			45.775	0.941474	0.93881	0.938772	0.941093	0.936294	0.939595	0.942986
45.825	0.938032	0.932594	0.935786	0.94164	0.937916			45.825	0.940626	0.939784	0.939352	0.939468	0.937454	0.939081	0.942722
45.875	0.938539	0.932005	0.937748	0.941914	0.938149			45.875	0.941638	0.94008	0.939742	0.942809	0.937765	0.945999	0.940059
45.925	0.939441	0.931943	0.938098	0.942435	0.938178			45.925	0.943769	0.939764	0.939955	0.94216	0.93617	0.941491	0.940002
45.975	0.938897	0.938775	0.936205	0.942608	0.939931			45.975	0.940649	0.940029	0.940029	0.942935	0.938762	0.942763	0.941394
46.025	0.939649	0.93389	0.938477	0.943844	0.940467			46.025	0.942004	0.940937	0.940539	0.943511	0.936921	0.944507	0.944027
46.075	0.939931	0.939318	0.940159	0.942496	0.941564			46.075	0.941067	0.941263	0.941122	0.94383	0.934115	0.942751	0.943312
46.125	0.940272	0.930129	0.937134	0.944393	0.939751			46.125	0.942202	0.94182	0.941528	0.945134	0.938948	0.945839	0.94602
46.175	0.9398	0.933746	0.938497	0.94479	0.940901			46.175	0.944766	0.941815	0.940963	0.942885	0.938372	0.943981	0.941958
46.225	0.940826	0.935141	0.938715	0.944942	0.941519			46.225	0.944401	0.942003	0.941716	0.944927	0.935973	0.943753	0.943963
46.275	0.940628	0.938586	0.940049	0.945353	0.941127			46.275	0.943131	0.941596	0.942165	0.945679	0.940549	0.944396	0.94301
46.325	0.940331	0.934699	0.938107	0.945383	0.940811			46.325	0.945587	0.942693	0.942349	0.944765	0.940437	0.944611	0.948806
46.375	0.94072	0.939122	0.94184	0.943777	0.941528			46.375	0.945622	0.942284	0.942993	0.944642	0.941243	0.944705	0.947183
46.425	0.941795	0.93965	0.938907	0.946554	0.940608			46.425	0.944341	0.943252	0.943211	0.947377	0.937422	0.947506	0.949834
46.475	0.941836	0.936917	0.941804	0.946458	0.942504			46.475	0.944041	0.94358	0.943509	0.944971	0.940733	0.947185	0.946732
46.525	0.94223	0.936998	0.939407	0.94611	0.942602			46.525	0.944278	0.943432	0.943501	0.946655	0.941006	0.946403	0.946606
46.575	0.943396	0.937812	0.94088	0.946512	0.941638			46.575	0.945096	0.943347	0.944211	0.945017	0.943254	0.948125	0.948923
46.625	0.942029	0.941463	0.941081	0.948361	0.943114			46.625	0.945863	0.944808	0.944207	0.947302	0.938579	0.946657	0.948654
46.675	0.942321	0.937745	0.94073	0.945598	0.942995			46.675	0.944136	0.944298	0.944595	0.946241	0.941985	0.948758	0.951545
46.725	0.942919	0.93684	0.942977	0.948651	0.942701			46.725	0.946827	0.944731	0.944437	0.948435	0.94383	0.949555	0.948167
46.775	0.943753	0.939609	0.942887	0.947581	0.944803			46.775	0.945724	0.944983	0.945044	0.947388	0.944381	0.948887	0.948426
46.825	0.944657	0.939101	0.942954	0.947487	0.944127			46.825	0.947763	0.945163	0.945498	0.947099	0.943505	0.9475	0.949367
46.875	0.943039	0.939937	0.943594	0.946457	0.945029			46.875	0.946926	0.945876	0.945351	0.949001	0.941794	0.947072	0.948806
46.925	0.944394	0.945203	0.942579	0.948885	0.945462			46.925	0.946863	0.946025	0.945405	0.948601	0.942617	0.946573	0.950066
46.975	0.943053	0.936942	0.94255	0.947575	0.943866			46.975	0.946401	0.946429	0.946809	0.947615	0.943478	0.950925	0.945605
47.025	0.944479	0.935932	0.942752	0.94926	0.945185			47.025	0.947916	0.94596	0.946346	0.95091	0.94096	0.948676	0.953703
47.075	0.94635	0.942213	0.941029	0.948561	0.944311			47.075	0.947899	0.946094	0.946601	0.949646	0.946326	0.950046	0.948278
47.125	0.945432	0.941149	0.94293	0.949719	0.946155			47.125	0.947781	0.946976	0.946476	0.94919	0.943589	0.948712	0.94693
47.175	0.945603	0.942636	0.945219	0.948215	0.945532			47.175	0.948394	0.946919	0.94674	0.947651	0.943951	0.951294	0.950833
47.225	0.945277	0.943037	0.941839	0.950161	0.946791			47.225	0.947344	0.947196	0.947543	0.949631	0.946141	0.952611	0.947708
47.275	0.946317	0.94097	0.947657	0.949978	0.946032			47.275	0.948832	0.948067	0.948231	0.950964	0.945625	0.949798	0.954522
47.325	0.945322	0.937069	0.942113	0.950357	0.947647			47.325	0.948889	0.948183	0.947624	0.950039	0.944499	0.949231	0.949758
47.375	0.946178	0.941102	0.944869	0.951535	0.947374			47.375	0.948839	0.948212	0.948211	0.951278	0.942901	0.951472	0.947955
47.425	0.945923	0.945916	0.943882	0.953573	0.946108			47.425	0.949821	0.948507	0.948914	0.950753	0.946026	0.950488	0.950554
47.475	0.94672	0.946899	0.947734	0.95098	0.947262			47.475	0.949824	0.948981	0.948536	0.952328	0.944741	0.952091	0.954204
47.525	0.946429	0.945692	0.94478	0.952044	0.946746			47.525	0.949797	0.949045	0.949461	0.951684	0.944089	0.955262	0.950584
47.575	0.945669	0.943244	0.948308	0.952286	0.947527			47.575	0.949194	0.949555	0.94886	0.951546	0.945247	0.952843	0.949885
47.625	0.946508	0.942409	0.947823	0.952355	0.948604			47.625	0.950228	0.949123	0.949998	0.950576	0.942457	0.953032	0.953875
47.675	0.947044	0.945963	0.946646	0.952458	0.948862			47.675	0.952241	0.949808	0.949853	0.952871	0.946383	0.948648	0.950711
47.725	0.948397	0.945441	0.945933	0.952812	0.949888			47.725	0.952138	0.950418	0.950122	0.954208	0.947389	0.954445	0.95449
47.775	0.948477	0.944294	0.946115	0.951339	0.948218			47.775	0.951713	0.950711	0.950403	0.953002	0.945305	0.950816	0.951827
47.825	0.948741	0.942453	0.946218	0.954465	0.949342			47.825	0.9529	0.951124	0.951393	0.953396	0.948173	0.952941	0.954666
47.875	0.948313	0.946298	0.946266	0.952132	0.949477			47.875	0.953203	0.950678	0.950372	0.952539	0.946472	0.954387	0.952445
47.925	0.948077	0.94704	0.94788	0.953469	0.949061			47.925	0.95256	0.951499	0.950961	0.95346	0.948392	0.953106	0.952169
47.975	0.949657	0.94564	0.949042	0.953971	0.949728			47.975	0.950448	0.951341	0.951635	0.954332	0.949463	0.955493	0.955832
48.025	0.948151	0.946007	0.95047	0.956337	0.950837			48.025	0.949215	0.951802	0.952234	0.955041	0.949806	0.956348	0.953954
48.075	0.949639	0.945966	0.949371	0.953947	0.948828			48.075	0.951596	0.952536	0.952234	0.954087	0.946117	0.955081	0.957173
48.125	0.948237	0.944985	0.949354	0.956356	0.949881			48.125	0.952151	0.952449	0.952452	0.955567	0.949641	0.953295	0.952211
48.175	0.949449	0.945386	0.949784	0.954433	0.951714			48.175	0.954198	0.95259	0.952131	0.955089	0.952515	0.954612	0.955862
48.225	0.949276	0.947845	0.949425	0.956499	0.951113			48.225	0.954178	0.952726	0.952387	0.957601	0.948185	0.952885	0.954909
48.275	0.948634	0.944716	0.948906	0.957406	0.951456			48.275	0.954045	0.952955	0.953041	0.95533	0.948847	0.954669	0.953431
48.325	0.951227	0.945426	0.95052	0.955582	0.950592			48.325	0.954443	0.9535	0.953391	0.956099	0.952614	0.959212	0.95762
48.375	0.950194	0.945786	0.949087	0.957252	0.95118			48.375	0.95384	0.953912	0.9535	0.956731	0.950775	0.956385	0.957332
48.425	0.951117	0.947764	0.952233	0.957399	0.952182			48.425	0.953309	0.954156	0.953722	0.956525	0.953519	0.956648	0.954754
48.475	0.950261	0.951895	0.951211	0.956336	0.951671			48.475	0.956586	0.953929	0.954382	0.958251	0.949946	0.955416	0.95738
48.525	0.950097	0.947624	0.95148	0.95778	0.952606			48.525	0.955201	0.954671	0.95429	0.95537	0.954231	0.957932	0.95873
48.575	0.95175	0.951036	0.950978	0.956654	0.952256			48.575	0.955635	0.954707	0.954827	0.957521	0.95234	0.956563	0.959264
48.625	0.951936	0.942673	0.951754	0.958056	0.953026			48.625	0.956639	0.95479	0.954834	0.956794	0.951304	0.958357	0.955182
48.675	0.95228	0.949527	0.953487	0.957609	0.95355			48.675	0.956937	0.95511	0.955366	0.958509	0.950939	0.957139	0.956448
48.725	0.952102	0.944495	0.952092	0.957327	0.952559			48.725	0.957431	0.955335	0.955106	0.957816	0.953429	0.958308	0.959566
48.775	0.953135	0.948276	0.951045	0.959074	0.954402			48.775	0.954111	0.955737	0.955631	0.958829	0.952913	0.959012	0.958981
48.825	0.952244	0.948225	0.953774	0.957345	0.95397			48.825	0.956172	0.955579	0.956071	0.957496	0.952132	0.958666	0.959661
48.875	0.95272	0.951846	0.952289	0.959303	0.95315			48.875	0.956674	0.955739	0.956724	0.958094	0.953425	0.956272	0.956905
48.925	0.952914	0.950212	0.951664	0.958245	0.954671			48.925	0.955653	0.956427	0.956089	0.958212	0.954912	0.962024	0.960027
48.975	0.95236	0.948628	0.952499	0.958561	0.95464			48.975	0.956507	0.956497	0.956592	0.960431	0.954661	0.959339	0.960786
49.025	0.952733	0.95118	0.95342	0.959581	0.956452			49.025	0.958572	0.956458	0.956452	0.958616	0.953295	0.955516	0.96037
49.075	0.953799	0.95177	0.952699	0.958772	0.954547			49.075	0.957207	0.957312	0.95731	0.960643	0.953252	0.958616	0.961178
49.125	0.954766	0.95248	0.952736	0.959079	0.954577			49.125	0.956508	0.95718	0.957393	0.960248	0.953097	0.958506	0.957713
49.175	0.954216	0.952867	0.950564	0.959742	0.95653			49.175	0.958334	0.957991	0.957492	0.961186	0.955003	0.959636	0.960367
49.225	0.955013	0.951369	0.952259	0.960181	0.955916			49.225	0.961254	0.958	0.957534	0.961467	0.955096	0.959865	0.955594
49.275	0.95499	0.944862	0.959829	0.961951	0.955021			49.275	0.957885	0.958315	0.957913	0.96114	0.956211	0.962892	0.960396
49.325	0.955421	0.948684	0.958578	0.961205	0.955612			49.325	0.957583	0.958339	0.959087	0.960804	0.956179	0.958803	0.963132
49.375	0.954687	0.953564	0.956737	0.960334	0.956111			49.375	0.959888	0.958661	0.958971	0.960773	0.957145	0.95927	0.962489
49.425	0.95654	0.951923	0.954034	0.961138	0.957589			49.425	0.962174	0.959439	0.959321	0.961129	0.954866	0.96097	0.961311
49.475	0.954067	0.958608	0.956481	0.961774	0.956689			49.475	0.960961	0.95915	0.959092	0.962091	0.95459	0.960847	0.962216
49.525	0.954176	0.953795	0.956545	0.960978	0.95583			49.525	0.962865	0.959917	0.959815	0.961112	0.95741	0.962851	0.960323
49.575	0.955535	0.955158	0.956952	0.961894	0.95663			49.575	0.959598	0.959499	0.959934	0.963418	0.956231	0.964729	0.962709
49.625	0.955412	0.954523	0.957613	0.963054	0.957484			49.625	0.963016	0.96033	0.959899	0.96132	0.955906	0.963511	0.960644
49.675	0.956123	0.953014	0.958614	0.96214	0.958852			49.675	0.957983	0.959779	0.959613	0.962738	0.95675	0.961294	0.95982
49.725	0.955265	0.954221	0.958582	0.96331	0.957661			49.725	0.96253	0.960685	0.960232	0.962959	0.955901	0.961373	0.961191
49.775	0.956914	0.955404	0.955662	0.963004	0.958047			49.775	0.960914	0.961155	0.960687	0.964221	0.957774	0.962865	0.960654
49.825	0.956602	0.956907	0.959167	0.964302	0.958978			49.825	0.964197	0.960885	0.961073	0.963622	0.957394	0.961394	0.964124
49.875	0.956906	0.956	0.958642	0.963845	0.959491			49.875	0.961919	0.961449	0.96125	0.96389	0.959755	0.964209	0.961095
49.925	0.956477	0.955271	0.955604	0.963499	0.958801			49.925	0.96414	0.961305	0.961409	0.962697	0.95658	0.962819	0.964685
49.975	0.957996	0.957392	0.958027	0.963126	0.959659			49.975	0.963063	0.961591	0.961518	0.963551	0.95515	0.962474	0.964707
50.025	0.95724	0.959859	0.959829	0.963901	0.960355			50.025	0.962262	0.961824	0.962144	0.964652	0.959294	0.963643	0.965333
50.075	0.957197	0.95619	0.959052	0.963904	0.959994			50.075	0.962111	0.962264	0.962624	0.964743	0.961263	0.963717	0.963907
50.125	0.958948	0.955432	0.960081	0.964405	0.959106			50.125	0.963443	0.962047	0.962473	0.964324	0.957864	0.96774	0.966526
50.175	0.957294	0.958494	0.960084	0.965448	0.960547			50.175	0.963755	0.962899	0.962234	0.964651	0.959086	0.96403	0.964721
50.225	0.958795	0.955802	0.961324	0.964905	0.959914			50.225	0.963119	0.963124	0.962814	0.965416	0.962219	0.968697	0.964613
50.275	0.95901	0.959956	0.960143	0.964968	0.960939			50.275	0.965977	0.963169	0.962885	0.964412	0.959698	0.965724	0.964557
50.325	0.958968	0.958049	0.960032	0.966273	0.960286			50.325	0.965529	0.963485	0.962853	0.965509	0.960324	0.966322	0.963947
50.375	0.957928	0.960923	0.961973	0.966156	0.960804			50.375	0.966257	0.964081	0.963544	0.966289	0.961394	0.965206	0.967512
50.425	0.957529	0.958894	0.962675	0.966943	0.961532			50.425	0.963744	0.96412	0.96401	0.966742	0.959823	0.964485	0.966527
50.475	0.959314	0.956089	0.963133	0.966653	0.961657			50.475	0.96375	0.963842	0.963852	0.964617	0.958278	0.96659	0.969067
50.525	0.959447	0.956409	0.961865	0.967173	0.96156			50.525	0.967534	0.963896	0.964119	0.965835	0.961669	0.966367	0.964168
50.575	0.959399	0.955556	0.960706	0.967375	0.96163			50.575	0.965292	0.964443	0.964335	0.965992	0.961777	0.965077	0.969112
50.625	0.960638	0.959758	0.965299	0.966975	0.962172			50.625	0.965266	0.964441	0.96462	0.968462	0.96188	0.965333	0.966144
50.675	0.960716	0.963829	0.96419	0.965495	0.962089			50.675	0.966532	0.965119	0.965226	0.967348	0.95948	0.969189	0.967031
50.725	0.960764	0.959399	0.962474	0.967713	0.962176			50.725	0.966746	0.964945	0.965109	0.968504	0.962669	0.965709	0.966998
50.775	0.960649	0.956077	0.962815	0.969808	0.96358			50.775	0.966965	0.965983	0.965562	0.967686	0.965018	0.969087	0.967009
50.825	0.961223	0.959451	0.96291	0.967403	0.963961			50.825	0.966001	0.965116	0.965327	0.968636	0.962923	0.967184	0.966153
50.875	0.961528	0.958033	0.962743	0.969448	0.962815			50.875	0.96412	0.965523	0.965477	0.967059	0.964736	0.970609	0.968783
50.925	0.962827	0.961968	0.961412	0.969409	0.964308			50.925	0.968737	0.965855	0.965947	0.970219	0.962818	0.969195	0.972157
50.975	0.961195	0.964686	0.964591	0.969139	0.962572			50.975	0.966506	0.966246	0.966188	0.967662	0.961383	0.966604	0.968729
51.025	0.962184	0.958761	0.964931	0.968281	0.96338			51.025	0.966597	0.966352	0.966593	0.970664	0.966537	0.968185	0.970457
51.075	0.961535	0.965273	0.965007	0.969283	0.964296			51.075	0.966408	0.966557	0.967408	0.969401	0.961708	0.972265	0.969706
51.125	0.962284	0.962492	0.965301	0.96877	0.965134			51.125	0.966869	0.966695	0.96662	0.968785	0.965493	0.967012	0.971198
51.175	0.963106	0.963334	0.965933	0.968364	0.964445			51.175	0.966957	0.966636	0.967283	0.969246	0.966925	0.969704	0.969525
51.225	0.962932	0.964151	0.965773	0.969213	0.965106			51.225	0.967365	0.967786	0.967457	0.969944	0.963138	0.972149	0.967818
51.275	0.963841	0.965897	0.966506	0.97064	0.965002			51.275	0.966888	0.968228	0.967824	0.970435	0.963468	0.968482	0.967109
51.325	0.963421	0.962978	0.966498	0.969308	0.964505			51.325	0.966951	0.967455	0.967811	0.970407	0.965893	0.971174	0.96929
51.375	0.962833	0.963285	0.965877	0.970528	0.965298			51.375	0.969459	0.968065	0.968691	0.970252	0.963236	0.970315	0.971231
51.425	0.962868	0.962135	0.966914	0.970461	0.964083			51.425	0.97011	0.968414	0.96817	0.971338	0.965174	0.969038	0.971182
51.475	0.964563	0.9626	0.964894	0.970401	0.965864			51.475	0.968321	0.968006	0.968177	0.970634	0.967286	0.973637	0.970098
51.525	0.963585	0.960153	0.965037	0.970856	0.965676			51.525	0.966419	0.968758	0.968674	0.970205	0.965185	0.971734	0.972838
51.575	0.964937	0.963384	0.966289	0.969541	0.966834			51.575	0.971417	0.96918	0.968903	0.97264	0.964825	0.970192	0.969025
51.625	0.964471	0.967771	0.966098	0.972551	0.966412			51.625	0.971349	0.96912	0.969691	0.970788	0.966562	0.968664	0.972237
51.675	0.96395	0.964777	0.962794	0.971942	0.965755			51.675	0.970255	0.969704	0.969107	0.970467	0.967534	0.972123	0.970882
51.725	0.964737	0.962656	0.966915	0.971743	0.966873			51.725	0.972074	0.969363	0.969785	0.970809	0.966597	0.972948	0.975605
51.775	0.96436	0.967649	0.96594	0.972206	0.967997			51.775	0.969682	0.969466	0.969761	0.971924	0.96882	0.969745	0.972153
51.825	0.964838	0.966432	0.967808	0.970912	0.966376			51.825	0.971061	0.970122	0.969804	0.970092	0.969629	0.972409	0.972409
51.875	0.966352	0.961273	0.966653	0.972126	0.968101			51.875	0.971926	0.970109	0.970449	0.973318	0.968822	0.972472	0.970689
51.925	0.965318	0.966947	0.96847	0.974324	0.968429			51.925	0.969438	0.970436	0.970135	0.971989	0.965826	0.973555	0.973079
51.975	0.966089	0.964721	0.96793	0.974198	0.967431			51.975	0.969944	0.970637	0.970895	0.974403	0.968591	0.970777	0.971215
52.025	0.966535	0.972044	0.965771	0.973866	0.967346			52.025	0.972391	0.970636	0.971529	0.975193	0.969443	0.972925	0.974739
52.075	0.965479	0.966597	0.970244	0.973888	0.968313			52.075	0.974348	0.97118	0.971246	0.973759	0.968013	0.971605	0.972003
52.125	0.96638	0.966002	0.968191	0.972646	0.970019			52.125	0.97092	0.971322	0.971551	0.972721	0.966563	0.970729	0.973331
52.175	0.966196	0.964187	0.96778	0.973088	0.968037			52.175	0.971913	0.971471	0.971311	0.973742	0.968463	0.974945	0.973007
52.225	0.9667	0.969745	0.969795	0.975237	0.969295			52.225	0.97229	0.971436	0.972192	0.973958	0.967871	0.972505	0.97423
52.275	0.966776	0.971083	0.965634	0.97492	0.968736			52.275	0.973726	0.971853	0.971968	0.97447	0.968914	0.972616	0.972049
52.325	0.967289	0.963212	0.966247	0.974937	0.96922			52.325	0.974304	0.97231	0.972518	0.974646	0.970126	0.975527	0.974577
52.375	0.966212	0.96533	0.969942	0.974233	0.969487			52.375	0.971963	0.972003	0.972225	0.974145	0.971629	0.976226	0.975488
52.425	0.968584	0.968003	0.96818	0.974078	0.969638			52.425	0.972553	0.972658	0.972507	0.976346	0.969359	0.975051	0.976484
52.475	0.966533	0.965425	0.970424	0.974669	0.970127			52.475	0.975161	0.97258	0.972335	0.975475	0.9679	0.974381	0.974641
52.525	0.968421	0.967452	0.971116	0.974176	0.96956			52.525	0.974671	0.972656	0.972473	0.976064	0.969613	0.973928	0.9765
52.575	0.968547	0.967034	0.967941	0.974965	0.970225			52.575	0.973415	0.973377	0.972908	0.976373	0.972647	0.976436	0.972046
52.625	0.967865	0.969036	0.96861	0.975478	0.972099			52.625	0.97323	0.973139	0.973264	0.976329	0.971367	0.976235	0.973742
52.675	0.968087	0.968915	0.972188	0.976454	0.97177			52.675	0.974981	0.973348	0.973819	0.975846	0.972059	0.976927	0.975402
52.725	0.96912	0.968877	0.969883	0.975684	0.970045			52.725	0.974708	0.97375	0.973636	0.976397	0.971797	0.976778	0.974818
52.775	0.968378	0.970593	0.971103	0.976207	0.971734			52.775	0.976508	0.973377	0.973615	0.976215	0.970312	0.976565	0.976247
52.825	0.96889	0.967959	0.972596	0.976385	0.970941			52.825	0.975962	0.974212	0.973766	0.976598	0.968852	0.975325	0.976582
52.875	0.96906	0.970477	0.970642	0.976055	0.971453			52.875	0.973459	0.974282	0.974344	0.978061	0.972214	0.976206	0.974844
52.925	0.96988	0.969169	0.97284	0.977116	0.972409			52.925	0.977284	0.974426	0.974715	0.976109	0.972381	0.975912	0.973179
52.975	0.96896	0.970654	0.973667	0.976224	0.972067			52.975	0.975465	0.974871	0.974816	0.977102	0.971293	0.978568	0.97564
53.025	0.970458	0.97438	0.97083	0.978787	0.971823			53.025	0.975983	0.975136	0.975004	0.977958	0.971719	0.976443	0.980507
53.075	0.970435	0.974515	0.97479	0.977684	0.971934			53.075	0.974395	0.974968	0.975122	0.977898	0.973203	0.977526	0.977208
53.125	0.970194	0.972243	0.970408	0.978355	0.972208			53.125	0.975674	0.975371	0.975498	0.978089	0.975604	0.976051	0.980061
53.175	0.970799	0.96873	0.973823	0.976343	0.973589			53.175	0.976997	0.975905	0.975378	0.976274	0.971919	0.97922	0.977251
53.225	0.969432	0.974344	0.97223	0.978135	0.972178			53.225	0.975356	0.975707	0.975647	0.978171	0.975081	0.982585	0.978302
53.275	0.970403	0.971586	0.97177	0.977608	0.973515			53.275	0.978692	0.976042	0.97574	0.978762	0.97255	0.979338	0.974566
53.325	0.971639	0.970939	0.974664	0.977947	0.972984			53.325	0.977633	0.975922	0.976302	0.979967	0.973284	0.977786	0.979035
53.375	0.971097	0.973378	0.975895	0.97897	0.972762			53.375	0.977287	0.976658	0.976351	0.978357	0.973694	0.978401	0.9805
53.425	0.971353	0.973704	0.97458	0.977727	0.973179			53.425	0.977515	0.976423	0.976631	0.979335	0.976084	0.98086	0.978005
53.475	0.972339	0.972595	0.97447	0.979135	0.97344			53.475	0.976975	0.976765	0.976724	0.979084	0.97486	0.976807	0.979763
53.525	0.972068	0.970553	0.971351	0.978812	0.974218			53.525	0.979315	0.976332	0.976676	0.980934	0.976103	0.978912	0.978915
53.575	0.972261	0.972198	0.975213	0.980041	0.97375			53.575	0.978133	0.977066	0.977753	0.97941	0.974212	0.980091	0.980614
53.625	0.972113	0.971532	0.972463	0.979929	0.974669			53.625	0.976332	0.976603	0.977208	0.977517	0.972423	0.983044	0.982792
53.675	0.972131	0.972335	0.977327	0.982456	0.974353			53.675	0.97755	0.977415	0.977257	0.979044	0.973499	0.979691	0.978689
53.725	0.971748	0.972007	0.975509	0.979706	0.974969			53.725	0.978619	0.977432	0.977638	0.978387	0.97362	0.979502	0.978468
53.775	0.973512	0.977487	0.978864	0.980201	0.974508			53.775	0.978615	0.977344	0.977486	0.980038	0.974872	0.97898	0.981975
53.825	0.973101	0.972992	0.975529	0.982102	0.975084			53.825	0.980558	0.978078	0.978218	0.979553	0.980524	0.980054	0.97995
53.875	0.973493	0.972309	0.972879	0.980928	0.975083			53.875	0.977979	0.978207	0.978444	0.979913	0.974694	0.980476	0.982072
53.925	0.973884	0.974153	0.974198	0.980156	0.9746			53.925	0.982105	0.978473	0.978276	0.981431	0.976005	0.984692	0.982113
53.975	0.973755	0.973514	0.976857	0.980995	0.974936			53.975	0.979719	0.978735	0.978393	0.980233	0.978646	0.985905	0.982328
54.025	0.972985	0.976786	0.976589	0.980687	0.975655			54.025	0.98028	0.978772	0.979292	0.982071	0.976374	0.983074	0.980805
54.075	0.975163	0.97298	0.978574	0.981911	0.975711			54.075	0.977806	0.978933	0.978553	0.981229	0.976829	0.982337	0.982368
54.125	0.974237	0.97401	0.976108	0.981741	0.974905			54.125	0.978171	0.979178	0.979137	0.980747	0.974995	0.981383	0.982105
54.175	0.974392	0.973121	0.978765	0.980742	0.976536			54.175	0.98266	0.979177	0.979245	0.981386	0.975857	0.980564	0.983488
54.225	0.974852	0.971893	0.974109	0.981772	0.977266			54.225	0.980524	0.979721	0.979609	0.981158	0.977417	0.983939	0.983718
54.275	0.974672	0.975083	0.977251	0.981919	0.974763			54.275	0.979395	0.979723	0.979833	0.981323	0.977256	0.983212	0.980644
54.325	0.974693	0.974732	0.97832	0.982931	0.975875			54.325	0.981071	0.980061	0.979757	0.98175	0.978867	0.983423	0.978858
54.375	0.976056	0.975481	0.976603	0.982302	0.977603			54.375	0.981458	0.979882	0.979984	0.982059	0.97805	0.983619	0.981888
54.425	0.975746	0.980122	0.98002	0.982801	0.976481			54.425	0.977888	0.979868	0.979921	0.983199	0.976289	0.983284	0.980465
54.475	0.97515	0.977712	0.97699	0.981085	0.977048			54.475	0.979338	0.9803	0.980128	0.983267	0.977469	0.980597	0.984103
54.525	0.976136	0.979237	0.979004	0.983309	0.978759			54.525	0.981244	0.980276	0.980465	0.983186	0.979193	0.984979	0.985265
54.575	0.97605	0.978375	0.977315	0.982935	0.977916			54.575	0.980872	0.980376	0.980698	0.98234	0.978394	0.983673	0.983857
54.625	0.975789	0.976074	0.978334	0.984189	0.978721			54.625	0.980427	0.981095	0.980972	0.983963	0.979064	0.981769	0.983423
54.675	0.976428	0.977139	0.978905	0.982198	0.977967			54.675	0.98104	0.981319	0.981305	0.984041	0.981299	0.986805	0.984452
54.725	0.975609	0.976147	0.979574	0.983212	0.979468			54.725	0.980857	0.981268	0.980939	0.984776	0.97875	0.984575	0.985709
54.775	0.977343	0.974728	0.980432	0.982572	0.979796			54.775	0.983567	0.981865	0.981137	0.983109	0.978061	0.988748	0.985681
54.825	0.97714	0.97668	0.97825	0.984228	0.977896			54.825	0.984413	0.982019	0.981915	0.983897	0.980512	0.981754	0.986367
54.875	0.977104	0.977629	0.979629	0.983685	0.978574			54.875	0.982124	0.981475	0.982084	0.984556	0.980778	0.98388	0.987209
54.925	0.977005	0.981687	0.979708	0.984238	0.979699			54.925	0.982711	0.981714	0.981978	0.983448	0.980173	0.983239	0.982645
54.975	0.977975	0.975989	0.981827	0.982754	0.979933			54.975	0.981166	0.982262	0.982476	0.982177	0.97955	0.985415	0.984794
55.025	0.97659	0.975981	0.982557	0.985211	0.978736			55.025	0.981049	0.981932	0.982357	0.984249	0.977934	0.98661	0.988464
55.075	0.977782	0.976591	0.981903	0.984156	0.979286			55.075	0.983233	0.982599	0.982599	0.984201	0.978883	0.982993	0.985949
55.125	0.978846	0.985574	0.978959	0.984878	0.980364			55.125	0.981081	0.982225	0.981735	0.984511	0.980555	0.985647	0.984215
55.175	0.978182	0.979588	0.980865	0.984302	0.979824			55.175	0.985501	0.982605	0.982794	0.984642	0.980822	0.984517	0.990052
55.225	0.978631	0.97995	0.978723	0.984045	0.979723			55.225	0.984743	0.983206	0.983109	0.987493	0.978142	0.985711	0.988749
55.275	0.979328	0.977342	0.982186	0.985533	0.97925			55.275	0.983476	0.983729	0.983165	0.985361	0.980116	0.984887	0.985337
55.325	0.978934	0.982316	0.980221	0.984644	0.979419			55.325	0.983853	0.983468	0.9835	0.985309	0.981948	0.987129	0.986713
55.375	0.978518	0.980033	0.981871	0.986034	0.981011			55.375	0.981385	0.983462	0.983965	0.984524	0.982087	0.98825	0.985672
55.425	0.978611	0.980103	0.982404	0.986971	0.980881			55.425	0.985015	0.983857	0.984128	0.986752	0.982388	0.986679	0.985901
55.475	0.978843	0.979814	0.984115	0.98641	0.981023			55.475	0.983637	0.983679	0.984026	0.985034	0.983758	0.985184	0.987761
55.525	0.979827	0.98051	0.979646	0.986365	0.980988			55.525	0.985466	0.983618	0.984419	0.986285	0.98174	0.988101	0.9841
55.575	0.978533	0.979511	0.982318	0.986853	0.98016			55.575	0.985148	0.984334	0.984032	0.986838	0.982318	0.991856	0.99008
55.625	0.979723	0.980264	0.980268	0.986498	0.982037			55.625	0.985615	0.984331	0.984706	0.986292	0.982182	0.986543	0.987694
55.675	0.97999	0.980197	0.982931	0.987176	0.981099			55.675	0.984796	0.984745	0.984494	0.986769	0.985586	0.988027	0.982952
55.725	0.98014	0.981646	0.983678	0.985839	0.981649			55.725	0.986502	0.98486	0.985291	0.986857	0.984999	0.986285	0.988585
55.775	0.980146	0.985278	0.983989	0.987048	0.983152			55.775	0.984491	0.98518	0.985156	0.986414	0.98158	0.984911	0.989145
55.825	0.980793	0.980182	0.983862	0.986512	0.982841			55.825	0.98474	0.985707	0.985	0.987377	0.984431	0.986189	0.988464
55.875	0.980786	0.981512	0.986775	0.987062	0.983021			55.875	0.985497	0.985075	0.984966	0.987906	0.983737	0.988476	0.988206
55.925	0.981744	0.981963	0.980909	0.985995	0.98265			55.925	0.985961	0.985424	0.985541	0.987103	0.982767	0.988835	0.991569
55.975	0.980234	0.98191	0.984258	0.98668	0.982841			55.975	0.986946	0.98561	0.985742	0.988234	0.982726	0.986809	0.990196
56.025	0.980923	0.984837	0.986323	0.986673	0.983458			56.025	0.986254	0.985583	0.985768	0.989213	0.984622	0.986288	0.988543
56.075	0.981357	0.97939	0.983625	0.987695	0.981679			56.075	0.988137	0.986107	0.985727	0.987409	0.984071	0.990489	0.987879
56.125	0.981214	0.979891	0.983384	0.987897	0.983101			56.125	0.986588	0.986092	0.985892	0.987059	0.982957	0.990199	0.991274
56.175	0.981772	0.983493	0.983841	0.988469	0.983109			56.175	0.989574	0.985615	0.986759	0.986696	0.983419	0.986536	0.987319
56.225	0.981335	0.984495	0.984869	0.987195	0.983814			56.225	0.986363	0.985964	0.986108	0.990895	0.985864	0.991416	0.990625
56.275	0.982043	0.985336	0.98713	0.988658	0.984356			56.275	0.987887	0.986592	0.986842	0.989722	0.985297	0.992541	0.987654
56.325	0.982235	0.985428	0.984932	0.98882	0.984219			56.325	0.987416	0.9868	0.986726	0.988666	0.987075	0.991293	0.99327
56.375	0.983317	0.982418	0.986094	0.989191	0.984682			56.375	0.987958	0.987407	0.98685	0.987761	0.983588	0.993163	0.990161
56.425	0.982162	0.981355	0.985202	0.989701	0.983495			56.425	0.987397	0.987003	0.987128	0.989842	0.984859	0.990826	0.989203
56.475	0.981675	0.9838	0.985491	0.990827	0.984371			56.475	0.98719	0.987049	0.987421	0.990022	0.984408	0.993166	0.992009
56.525	0.983888	0.981992	0.987364	0.990613	0.984807			56.525	0.988911	0.987674	0.987236	0.990178	0.986809	0.989882	0.990599
56.575	0.982588	0.982347	0.984177	0.990357	0.984573			56.575	0.988306	0.987311	0.987848	0.991023	0.985688	0.991384	0.991286
56.625	0.983702	0.984927	0.986865	0.988998	0.984433			56.625	0.989601	0.987926	0.987776	0.987125	0.985244	0.989494	0.990913
56.675	0.983335	0.982497	0.987227	0.989681	0.983827			56.675	0.98993	0.987525	0.987691	0.990865	0.986339	0.989633	0.990272
56.725	0.982763	0.98413	0.985502	0.990153	0.983338			56.725	0.986974	0.988169	0.988194	0.991227	0.985065	0.990285	0.990359
56.775	0.983938	0.987916	0.984289	0.990074	0.985838			56.775	0.987814	0.988364	0.988222	0.989463	0.988557	0.992653	0.990761
56.825	0.984273	0.98588	0.986537	0.990234	0.986039			56.825	0.989187	0.988639	0.988267	0.990861	0.987588	0.991375	0.994375
56.875	0.983505	0.980436	0.985587	0.991676	0.985723			56.875	0.988151	0.988362	0.988295	0.99092	0.989638	0.99053	0.994915
56.925	0.984647	0.985666	0.987739	0.990985	0.985888			56.925	0.989426	0.988305	0.988558	0.990929	0.988307	0.9923	0.993954
56.975	0.983718	0.984352	0.987885	0.990623	0.985033			56.975	0.989203	0.988995	0.988992	0.992565	0.987439	0.991172	0.991933
57.025	0.983694	0.987877	0.98838	0.991074	0.985544			57.025	0.990065	0.988552	0.988857	0.991586	0.98783	0.992062	0.99283
57.075	0.984075	0.984734	0.987831	0.989338	0.987206			57.075	0.988382	0.988907	0.989053	0.991472	0.988531	0.992773	0.990723
57.125	0.985626	0.988706	0.985882	0.990366	0.986069			57.125	0.989136	0.989148	0.989303	0.991003	0.987408	0.98922	0.992175
57.175	0.986025	0.988768	0.988581	0.991946	0.985658			57.175	0.991313	0.989114	0.989573	0.991949	0.98744	0.989846	0.992892
57.225	0.985577	0.984939	0.988436	0.989851	0.985592			57.225	0.991001	0.989445	0.989796	0.991203	0.985898	0.993358	0.992217
57.275	0.985779	0.987709	0.988231	0.990474	0.986384			57.275	0.989825	0.989901	0.989477	0.992479	0.990314	0.994823	0.993738
57.325	0.986181	0.988549	0.99043	0.992461	0.985974			57.325	0.991578	0.99003	0.989873	0.991882	0.989262	0.994187	0.992994
57.375	0.985801	0.988333	0.989988	0.991868	0.987025			57.375	0.991938	0.989598	0.990182	0.991257	0.98771	0.99167	0.99263
57.425	0.985973	0.985397	0.990583	0.992727	0.986681			57.425	0.989918	0.989953	0.989867	0.992366	0.989875	0.992538	0.993079
57.475	0.986383	0.989022	0.990342	0.992304	0.987051			57.475	0.991038	0.990011	0.990225	0.99075	0.989891	0.994014	0.995685
57.525	0.98643	0.988914	0.988999	0.992672	0.987926			57.525	0.992202	0.990684	0.990654	0.993835	0.986451	0.992544	0.995126
57.575	0.985925	0.988693	0.989427	0.992063	0.987659			57.575	0.991984	0.990849	0.990162	0.992145	0.990718	0.995942	0.99771
57.625	0.985649	0.98915	0.989328	0.993525	0.988185			57.625	0.991497	0.990806	0.990944	0.993143	0.988184	0.993272	0.992491
57.675	0.984838	0.98993	0.990141	0.993379	0.987332			57.675	0.991693	0.990715	0.990169	0.991667	0.990384	0.994006	0.993485
57.725	0.987251	0.992507	0.990341	0.991698	0.987052			57.725	0.991638	0.991179	0.990775	0.992975	0.990879	0.995198	0.993027
57.775	0.987345	0.990798	0.988409	0.993393	0.988894			57.775	0.993505	0.990841	0.990862	0.993643	0.988557	0.99471	0.992727
57.825	0.987622	0.989776	0.989426	0.993765	0.986586			57.825	0.990931	0.991091	0.99154	0.993111	0.990462	0.997899	0.994998
57.875	0.987307	0.990879	0.989717	0.994592	0.988668			57.875	0.990906	0.991697	0.991761	0.992234	0.99042	0.995306	0.993411
57.925	0.987081	0.987037	0.988777	0.994247	0.989132			57.925	0.991029	0.991733	0.991881	0.99282	0.989393	0.993654	0.9934
57.975	0.987213	0.99153	0.991853	0.994663	0.989152			57.975	0.99243	0.991733	0.991791	0.994548	0.99076	0.993444	0.994948
58.025	0.987321	0.988129	0.990361	0.993426	0.9886			58.025	0.990832	0.991788	0.992356	0.993183	0.988941	0.995418	0.994777
58.075	0.987816	0.985838	0.989996	0.993709	0.989277			58.075	0.99301	0.992371	0.992096	0.994161	0.991365	0.996768	0.994683
58.125	0.987136	0.992998	0.992077	0.994549	0.989321			58.125	0.992076	0.992074	0.992182	0.995804	0.991099	0.99652	0.996317
58.175	0.987498	0.986563	0.992083	0.993295	0.98962			58.175	0.99361	0.992459	0.992303	0.994617	0.990427	0.994732	0.997833
58.225	0.988151	0.988739	0.991717	0.99417	0.988865			58.225	0.991493	0.992217	0.992437	0.995066	0.99292	0.996228	0.995528
58.275	0.989231	0.991007	0.992423	0.994943	0.989374			58.275	0.992613	0.992752	0.992103	0.994558	0.990323	0.998168	0.996507
58.325	0.988367	0.99306	0.993118	0.995434	0.989551			58.325	0.994644	0.992478	0.992983	0.993743	0.995022	0.994985	0.996543
58.375	0.988891	0.988844	0.990491	0.994275	0.990023			58.375	0.993145	0.993107	0.992609	0.995345	0.993726	0.997011	0.996562
58.425	0.988439	0.992484	0.990627	0.99442	0.99077			58.425	0.99361	0.99305	0.993356	0.996171	0.992631	0.997049	0.998125
58.475	0.989326	0.987289	0.992105	0.99481	0.989673			58.475	0.996528	0.99313	0.993262	0.99504	0.993642	0.995545	0.996544
58.525	0.988323	0.98861	0.990924	0.995312	0.991007			58.525	0.996207	0.992927	0.993174	0.994784	0.990575	0.998401	0.999427
58.575	0.989253	0.994718	0.991906	0.996894	0.990593			58.575	0.991628	0.993278	0.993715	0.996431	0.996205	0.99457	0.997906
58.625	0.989592	0.991535	0.991136	0.99606	0.99078			58.625	0.994469	0.993431	0.993565	0.9967	0.992996	0.996815	0.996711
58.675	0.989409	0.994514	0.993822	0.995446	0.99018			58.675	0.996236	0.993522	0.993725	0.997119	0.993212	0.999359	0.997338
58.725	0.988679	0.991933	0.993716	0.996839	0.991139			58.725	0.994372	0.993804	0.994097	0.995973	0.992533	0.996848	0.998396
58.775	0.988916	0.993865	0.992753	0.996198	0.990825			58.775	0.993658	0.994443	0.994096	0.996061	0.992648	0.999241	0.99783
58.825	0.99001	0.99141	0.99446	0.996213	0.991386			58.825	0.99604	0.994164	0.994165	0.996404	0.994167	0.998141	0.993189
58.875	0.991028	0.992524	0.993186	0.996289	0.991647			58.875	0.996696	0.994382	0.994278	0.99786	0.992667	1.00112	1.00021
58.925	0.990851	0.991296	0.996292	0.996473	0.991769			58.925	0.996743	0.993805	0.994669	0.996383	0.992526	0.997077	0.997285
58.975	0.990923	0.994758	0.993263	0.995581	0.992212			58.975	0.995906	0.994701	0.994628	0.998022	0.996499	1.00015	1.00171
59.025	0.991009	0.992655	0.994492	0.996341	0.993033			59.025	0.996087	0.994721	0.994719	0.997677	0.993309	0.997307	1.00049
59.075	0.990584	0.993172	0.991349	0.996297	0.991318			59.075	0.996188	0.994816	0.994534	0.997034	0.994526	0.998443	0.997617
59.125	0.990609	0.995013	0.992491	0.997207	0.991091			59.125	0.99599	0.995335	0.994612	0.995946	0.995642	0.997908	0.996635
59.175	0.990022	0.99294	0.994737	0.996479	0.992409			59.175	0.995956	0.995188	0.995254	0.998183	0.99571	0.996466	0.998736
59.225	0.990607	0.994624	0.9954	0.997374	0.992592			59.225	0.995987	0.995488	0.995182	0.99882	0.995746	0.999572	0.999206
59.275	0.991123	0.993127	0.996247	0.997143	0.991961			59.275	0.996466	0.995534	0.994974	0.997184	0.995404	1.00015	1.00273
59.325	0.991133	0.990685	0.994482	0.997336	0.992095			59.325	0.995376	0.995471	0.995546	0.997561	0.996176	0.997048	0.997646
59.375	0.991828	0.99448	0.994675	0.999588	0.992111			59.375	0.994985	0.995956	0.995553	0.997473	0.993548	1.00083	1.00038
59.425	0.991907	0.995145	0.995014	0.998204	0.992759			59.425	0.994852	0.995543	0.995942	0.997199	0.995357	0.999081	0.998352
59.475	0.991388	0.993426	0.996404	0.998533	0.991652			59.475	0.995967	0.995801	0.995594	0.999613	0.994274	0.998414	1.00058
59.525	0.991015	0.994545	0.997165	0.99736	0.993263			59.525	0.996674	0.996153	0.995758	0.997676	0.993946	0.999751	1.00031
59.575	0.991327	0.99312	0.994569	0.997969	0.992562			59.575	0.994858	0.99639	0.995923	0.998378	0.996719	0.99893	0.99845
59.625	0.99123	0.993897	0.99648	0.996601	0.993725			59.625	0.996875	0.996374	0.99615	0.998811	0.992373	1.0031	1.00084
59.675	0.991442	0.993304	0.996062	0.999224	0.993037			59.675	0.998551	0.996465	0.99702	1.00031	0.993436	0.999674	1.00225
59.725	0.993031	0.994091	0.996078	0.999841	0.992883			59.725	0.995537	0.996419	0.996762	0.998696	0.995229	0.99959	0.998245
59.775	0.992017	0.996511	0.996998	0.998244	0.993555			59.775	0.998828	0.996432	0.996784	0.998338	0.995839	1.00074	1.00055
59.825	0.992137	0.994351	0.995466	0.999454	0.993587			59.825	0.997523	0.996554	0.996813	0.999849	0.997571	1.00309	1.00183
59.875	0.992622	0.995634	0.997971	0.997801	0.994008			59.875	0.996144	0.996523	0.997351	1.00001	0.996467	1.00074	1.00147
59.925	0.992546	0.996922	0.996762	0.999888	0.99423			59.925	0.996879	0.997028	0.996736	1.00086	0.993476	1.00266	1.00306
59.975	0.992805	0.992771	0.998251	0.999135	0.993732			59.975	0.996571	0.997574	0.997387	0.999254	0.996521	1.00022	1.00188
