# Supplementary material for: Direct and indirect salt effects on homotypic phase separation
Source: eLife. 2024 Nov 12;13:RP100282. doi: 10.7554/eLife.100282 (PMC11556789; doi:10.7554/eLife.100282)
Supplement: Figure 3—figure supplement 2—source data 1. [file elife-100282-fig3-figsupp2-data1.xlsx]

## Sheet: Supplementary Figure 3
A							B
	g(r)							g(r)
Distance (Å)	Asp OD1/OD2	Asn OD1	Gln OE1	BB O	Ser OG		Distance (Å)	Tyr OG	Asn ND2	Gln NE2	BB N	Arg NH1	Arg NH2	Lys NZ
0.025	0	0	0	0	0		0.025	0	0	0	0	0	0	0
0.075	0	0	0	0	0		0.075	0	0	0	0	0	0	0
0.125	0	0	0	0	0		0.125	0	0	0	0	0	0	0
0.175	0	0	0	0	0		0.175	0	0	0	0	0	0	0
0.225	0	0	0	0	0		0.225	0	0	0	0	0	0	0
0.275	0	0	0	0	0		0.275	0	0	0	0	0	0	0
0.325	0	0	0	0	0		0.325	0	0	0	0	0	0	0
0.375	0	0	0	0	0		0.375	0	0	0	0	0	0	0
0.425	0	0	0	0	0		0.425	0	0	0	0	0	0	0
0.475	0	0	0	0	0		0.475	0	0	0	0	0	0	0
0.525	0	0	0	0	0		0.525	0	0	0	0	0	0	0
0.575	0	0	0	0	0		0.575	0	0	0	0	0	0	0
0.625	0	0	0	0	0		0.625	0	0	0	0	0	0	0
0.675	0	0	0	0	0		0.675	0	0	0	0	0	0	0
0.725	0	0	0	0	0		0.725	0	0	0	0	0	0	0
0.775	0	0	0	0	0		0.775	0	0	0	0	0	0	0
0.825	0	0	0	0	0		0.825	0	0	0	0	0	0	0
0.875	0	0	0	0	0		0.875	0	0	0	0	0	0	0
0.925	0	0	0	0	0		0.925	0	0	0	0	0	0	0
0.975	0	0	0	0	0		0.975	0	0	0	0	0	0	0
1.025	0	0	0	0	0		1.025	0	0	0	0	0	0	0
1.075	0	0	0	0	0		1.075	0	0	0	0	0	0	0
1.125	0	0	0	0	0		1.125	0	0	0	0	0	0	0
1.175	0	0	0	0	0		1.175	0	0	0	0	0	0	0
1.225	0	0	0	0	0		1.225	0	0	0	0	0	0	0
1.275	0	0	0	0	0		1.275	0	0	0	0	0	0	0
1.325	0	0	0	0	0		1.325	0	0	0	0	0	0	0
1.375	0	0	0	0	0		1.375	0	0	0	0	0	0	0
1.425	0	0	0	0	0		1.425	0	0	0	0	0	0	0
1.475	0	0	0	0	0		1.475	0	0	0	0	0	0	0
1.525	0	0	0	0	0		1.525	0	0	0	0	0	0	0
1.575	0	0	0	0	0		1.575	0	0	0	0	0	0	0
1.625	0	0	0	0	0		1.625	0	0	0	0	0	0	0
1.675	0	0	0	0	0		1.675	0	0	0	0	0	0	0
1.725	0	0	0	0	0		1.725	0	0	0	0	0	0	0
1.775	0	0	0	0	0		1.775	0	0	0	0	0	0	0
1.825	0	0	0	0	0		1.825	0	0	0	0	0	0	0
1.875	0	0	0	0	0		1.875	0	0	0	0	0	0	0
1.925	0	0	0	0	0		1.925	0	0	0	0	0	0	0
1.975	0.002412	0	0	0.000166	0		1.975	0	0	0	0	0	0	0
2.025	0.100941	0.028588	0.013765	0.009772	0		2.025	0	0	0	0	0	0	0
2.075	1.14598	0.270254	0.28349	0.136397	0.003873		2.075	0	0	0	0	0	0	0
2.125	4.05095	1.49997	1.14685	0.754277	0.042897		2.125	0.001786	0	0	0	0	0	0
2.175	7.67802	3.70799	2.7756	2.01814	0.235379		2.175	0.011932	0	0	0	0	0	0
2.225	9.24563	5.77571	3.96913	3.2129	0.682791		2.225	0.045606	0	0	0	0	0	0
2.275	8.29296	6.08922	4.2519	3.5478	1.25913		2.275	0.06933	0	0	0	0	0	0
2.325	6.02579	5.18837	3.39228	3.06515	1.52973		2.325	0.155135	0.000402	0	0	0	0	0
2.375	4.16283	3.77911	2.25403	2.26421	1.51262		2.375	0.189414	0	0.002502	0	0	0	0
2.425	2.62677	2.42102	1.46976	1.49043	1.28815		2.425	0.21665	0.000738	0	0	0	0	0
2.475	1.63558	1.54981	0.920301	0.933974	0.999567		2.475	0.196796	0.000354	0.002304	0	0	0	0
2.525	1.06681	0.953424	0.5655	0.566302	0.704032		2.525	0.177064	0.004086	0.005533	0	0	0	0
2.575	0.67038	0.564134	0.316036	0.353117	0.494127		2.575	0.144109	0.002292	0.003192	0	0.000426	0	0
2.625	0.451901	0.353182	0.188406	0.218233	0.351679		2.625	0.100054	0.003781	0.002048	0	0	0	0
2.675	0.341822	0.228758	0.15382	0.138134	0.23808		2.675	0.090714	0.004551	0.00493	0	0.000789	0	0
2.725	0.27365	0.14852	0.085516	0.089012	0.154619		2.725	0.068955	0.004678	0.006651	2.9e-05	0	0.00038	0
2.775	0.200963	0.09247	0.056807	0.060318	0.120444		2.775	0.049739	0.004511	0.006414	0	0	0.000733	0
2.825	0.174462	0.071272	0.044205	0.041951	0.083105		2.825	0.045973	0.007073	0.015914	5.4e-05	0.001061	0.000354	0
2.875	0.168447	0.050692	0.04012	0.031721	0.059132		2.875	0.031706	0.005778	0.010243	0.000104	0.001366	0.000683	0
2.925	0.162187	0.041868	0.022266	0.024602	0.047232		2.925	0.039585	0.011672	0.009896	0.000151	0.001319	0.00066	0
2.975	0.175914	0.029925	0.016741	0.020861	0.036526		2.975	0.028699	0.014717	0.016741	0.000195	0.000957	0.000319	0
3.025	0.186596	0.022776	0.013879	0.016622	0.02916		3.025	0.01454	0.025386	0.019276	0.0004	0.001234	0.001542	0
3.075	0.205948	0.022271	0.0097	0.014992	0.024692		3.075	0.017909	0.039491	0.026863	0.000501	0.001492	0.002388	0
3.125	0.239871	0.016229	0.016618	0.013413	0.02115		3.125	0.020643	0.055132	0.03757	0.001037	0.001445	0.002312	0
3.175	0.288369	0.018306	0.014698	0.012695	0.018198		3.175	0.017198	0.085929	0.069993	0.001752	0.0042	0.00336	0
3.225	0.326985	0.017325	0.014925	0.014894	0.017638		3.225	0.01822	0.127329	0.089548	0.002548	0.004342	0.003256	0
3.275	0.389877	0.015383	0.012499	0.014041	0.0183		3.275	0.01654	0.172859	0.103938	0.0046	0.005263	0.007105	0
3.325	0.460781	0.02003	0.015317	0.016583	0.020306		3.325	0.020422	0.226414	0.142957	0.00758	0.006127	0.006893	0
3.375	0.539318	0.02249	0.019822	0.019141	0.018132		3.375	0.014158	0.278077	0.172821	0.013599	0.010902	0.007433	0.001239
3.425	0.617116	0.029056	0.024059	0.023196	0.022309		3.425	0.020278	0.349597	0.235178	0.020423	0.011067	0.013233	0.004812
3.475	0.648177	0.032541	0.023956	0.027101	0.028259		3.475	0.016694	0.410444	0.240729	0.030865	0.014257	0.019399	0.005843
3.525	0.681782	0.041758	0.029527	0.033359	0.033244		3.525	0.023038	0.461956	0.298682	0.04697	0.016127	0.023622	0.010221
3.575	0.7313	0.046883	0.038092	0.040811	0.041053		3.575	0.022398	0.482928	0.311364	0.065641	0.02937	0.03202	0.022083
3.625	0.767108	0.05832	0.04564	0.049628	0.05223		3.625	0.03283	0.543218	0.346863	0.09214	0.030498	0.039948	0.032216
3.675	0.799316	0.068157	0.054855	0.064781	0.057752		3.675	0.030749	0.549113	0.339056	0.12114	0.03866	0.056004	0.045974
3.725	0.845463	0.089652	0.065596	0.079543	0.072669		3.725	0.04591	0.589545	0.383408	0.159769	0.046578	0.064884	0.088479
3.775	0.897483	0.120656	0.092092	0.095592	0.086691		3.775	0.049512	0.595055	0.418374	0.203111	0.058226	0.07605	0.110906
3.825	0.942975	0.138593	0.110437	0.113474	0.106798		3.825	0.066965	0.613877	0.418118	0.252777	0.076004	0.093558	0.142748
3.875	0.975498	0.159619	0.127811	0.137137	0.122514		3.875	0.076525	0.633705	0.467074	0.303443	0.082889	0.116533	0.180439
3.925	1.01065	0.199546	0.149765	0.159929	0.149973		3.925	0.084272	0.629077	0.441968	0.354259	0.103874	0.137766	0.270219
3.975	1.06695	0.223137	0.165669	0.18586	0.162056		3.975	0.100282	0.686997	0.46575	0.413211	0.108958	0.152362	0.247388
4.025	1.06384	0.258366	0.203389	0.206777	0.187988		4.025	0.11224	0.698579	0.502158	0.470325	0.132399	0.190062	0.287445
4.075	1.05347	0.283572	0.238794	0.229161	0.211214		4.075	0.129898	0.703897	0.477164	0.528875	0.142257	0.208201	0.332273
4.125	1.0972	0.295495	0.24631	0.250254	0.245103		4.125	0.144066	0.695358	0.51045	0.590125	0.154752	0.216122	0.326754
4.175	1.138	0.326697	0.269995	0.272538	0.262893		4.175	0.174407	0.719531	0.55011	0.658665	0.166126	0.238017	0.397504
4.225	1.14364	0.347956	0.306331	0.287163	0.280855		4.225	0.177079	0.696763	0.547049	0.729052	0.179451	0.259769	0.40001
4.275	1.12013	0.346517	0.329322	0.306101	0.302823		4.275	0.185978	0.669038	0.539732	0.799133	0.193501	0.266855	0.408467
4.325	1.12783	0.365245	0.349664	0.31375	0.314173		4.325	0.194851	0.62766	0.510351	0.840896	0.195993	0.283654	0.417183
4.375	1.0877	0.353088	0.368996	0.327915	0.314942		4.375	0.180522	0.574605	0.467051	0.847032	0.210118	0.280452	0.431294
4.425	1.002	0.374536	0.385208	0.338866	0.325227		4.425	0.192321	0.496388	0.416197	0.780257	0.203811	0.284528	0.407909
4.475	0.958356	0.364912	0.374534	0.347011	0.315309		4.475	0.186034	0.443836	0.37242	0.68207	0.207315	0.284265	0.368544
4.525	0.916388	0.363466	0.39387	0.346992	0.325296		4.525	0.195335	0.376508	0.322539	0.554601	0.202621	0.278294	0.309445
4.575	0.867477	0.350794	0.383285	0.344894	0.309276		4.575	0.181265	0.334406	0.272042	0.442299	0.210082	0.273323	0.368116
4.625	0.811439	0.348426	0.368116	0.345696	0.320317		4.625	0.187734	0.289662	0.257285	0.3519	0.198308	0.262563	0.316659
4.675	0.73219	0.330186	0.353505	0.339396	0.310744		4.675	0.180603	0.2685	0.242126	0.297206	0.20132	0.258527	0.311213
4.725	0.659257	0.319054	0.353964	0.33256	0.310638		4.725	0.182038	0.254387	0.222808	0.261536	0.190635	0.248027	0.282539
4.775	0.627575	0.310217	0.327713	0.323685	0.304954		4.775	0.175417	0.242613	0.220642	0.242594	0.185797	0.241127	0.283461
4.825	0.540686	0.298132	0.338838	0.311302	0.298226		4.825	0.173186	0.240595	0.223972	0.235538	0.181724	0.23555	0.298226
4.875	0.51837	0.285654	0.303718	0.303825	0.295972		4.875	0.175589	0.228468	0.20901	0.233369	0.191553	0.229793	0.268388
4.925	0.47396	0.259476	0.30631	0.292491	0.300624		4.925	0.167222	0.228507	0.229514	0.231453	0.18396	0.229572	0.285656
4.975	0.424951	0.248585	0.280228	0.281619	0.294974		4.975	0.162574	0.220253	0.21067	0.234127	0.185983	0.222016	0.246875
5.025	0.380024	0.243921	0.24031	0.27071	0.304629		5.025	0.167818	0.220964	0.215161	0.238433	0.184312	0.231703	0.248693
5.075	0.351753	0.238632	0.244912	0.26219	0.296664		5.075	0.169067	0.227169	0.209846	0.23917	0.195272	0.224092	0.238885
5.125	0.331133	0.224245	0.213294	0.2534	0.292564		5.125	0.15289	0.222262	0.20228	0.243278	0.191481	0.221245	0.24929
5.175	0.336007	0.227959	0.216305	0.24703	0.301453		5.175	0.160187	0.233552	0.222102	0.241528	0.183899	0.233958	0.224473
5.225	0.339772	0.225605	0.213995	0.241615	0.305579		5.225	0.144288	0.237136	0.228985	0.241867	0.187736	0.225987	0.225883
5.275	0.339955	0.231335	0.199054	0.237281	0.300828		5.275	0.151708	0.245145	0.229482	0.243831	0.196163	0.231866	0.234807
5.325	0.355664	0.219891	0.209019	0.235118	0.308325		5.325	0.14873	0.244391	0.239625	0.245656	0.202251	0.236689	0.205037
5.375	0.37871	0.237536	0.214917	0.230249	0.311452		5.375	0.143185	0.25234	0.251062	0.246402	0.201338	0.23807	0.202217
5.425	0.385826	0.237014	0.217687	0.22937	0.323653		5.425	0.139873	0.26534	0.25197	0.249926	0.217974	0.236578	0.215769
5.475	0.378498	0.245958	0.20855	0.229756	0.328425		5.475	0.145266	0.2666	0.265278	0.255336	0.203937	0.24527	0.203843
5.525	0.395101	0.244158	0.20826	0.230508	0.331291		5.525	0.13578	0.282208	0.288698	0.259021	0.215888	0.248525	0.218199
5.575	0.42346	0.255166	0.21453	0.23089	0.333548		5.575	0.141658	0.286319	0.269695	0.263927	0.23092	0.248173	0.207038
5.625	0.433359	0.263961	0.225228	0.232394	0.341916		5.625	0.1496	0.295867	0.295249	0.26947	0.231293	0.259034	0.2172
5.675	0.447227	0.272408	0.22522	0.231568	0.336595		5.675	0.14998	0.290474	0.317674	0.273767	0.232055	0.259748	0.206379
5.725	0.469157	0.272042	0.23465	0.233253	0.341936		5.725	0.158074	0.319999	0.308705	0.27362	0.235081	0.261172	0.201498
5.775	0.496047	0.27933	0.242452	0.238786	0.342887		5.775	0.157162	0.323205	0.300209	0.272746	0.251253	0.261324	0.207333
5.825	0.493252	0.294518	0.250369	0.241035	0.353965		5.825	0.174082	0.313521	0.326478	0.272719	0.257023	0.269583	0.243299
5.875	0.534498	0.287325	0.261457	0.245133	0.348895		5.875	0.160385	0.330222	0.325033	0.268041	0.26207	0.277198	0.25144
5.925	0.531277	0.301976	0.247818	0.246819	0.349024		5.925	0.170208	0.326775	0.312536	0.260443	0.263776	0.280016	0.246813
5.975	0.536126	0.302355	0.272345	0.252614	0.355029		5.975	0.182617	0.336349	0.320569	0.258679	0.284282	0.277642	0.249024
6.025	0.531799	0.309439	0.281255	0.260042	0.352024		6.025	0.182376	0.32756	0.334901	0.25619	0.282305	0.285648	0.266288
6.075	0.565397	0.317014	0.275688	0.263619	0.348339		6.075	0.178184	0.335191	0.334382	0.255365	0.287771	0.291366	0.281806
6.125	0.544042	0.321755	0.284935	0.270663	0.347873		6.125	0.190656	0.336222	0.328945	0.258741	0.298966	0.298138	0.27572
6.175	0.575236	0.320836	0.310687	0.274852	0.35		6.175	0.195722	0.335411	0.338998	0.261851	0.308355	0.300213	0.299399
6.225	0.56579	0.332902	0.287508	0.279428	0.350161		6.225	0.196337	0.330773	0.333028	0.26569	0.309103	0.300217	0.310632
6.275	0.551314	0.343883	0.304806	0.282478	0.352357		6.275	0.203972	0.337487	0.328459	0.267272	0.311149	0.312869	0.311794
6.325	0.56462	0.340367	0.307766	0.287626	0.352965		6.325	0.192999	0.333692	0.343745	0.269698	0.316831	0.314715	0.314292
6.375	0.553946	0.346321	0.304693	0.288343	0.355499		6.375	0.21052	0.343169	0.336638	0.270998	0.325562	0.318478	0.328131
6.425	0.552195	0.359096	0.320138	0.288961	0.367111		6.425	0.207647	0.336166	0.334838	0.274202	0.333846	0.322087	0.348341
6.475	0.564568	0.358594	0.328004	0.288745	0.367032		6.475	0.214261	0.351759	0.321945	0.271278	0.327297	0.329384	0.349713
6.525	0.534736	0.362808	0.332276	0.289119	0.370197		6.525	0.212505	0.354292	0.342551	0.271944	0.340331	0.327139	0.356306
6.575	0.525002	0.374185	0.33067	0.290968	0.376369		6.575	0.22169	0.346464	0.33475	0.272693	0.32956	0.333346	0.350582
6.625	0.518286	0.383546	0.349168	0.290789	0.384915		6.625	0.229931	0.349663	0.332288	0.272023	0.336372	0.339265	0.355598
6.675	0.503688	0.364324	0.34269	0.288794	0.387837		6.675	0.227223	0.355894	0.327962	0.273311	0.337369	0.342436	0.348707
6.725	0.496539	0.367568	0.348222	0.288803	0.387509		6.725	0.225016	0.358975	0.33184	0.272883	0.331934	0.342481	0.371624
6.775	0.472533	0.377487	0.351709	0.290747	0.3855		6.775	0.22522	0.364101	0.323118	0.27385	0.345499	0.339719	0.372
6.825	0.4724	0.363167	0.361117	0.292368	0.391246		6.825	0.23431	0.370764	0.322945	0.270777	0.348332	0.35633	0.395956
6.875	0.448038	0.363554	0.365138	0.293728	0.387666		6.875	0.238848	0.366172	0.328117	0.270805	0.349554	0.342328	0.354987
6.925	0.439042	0.363755	0.372538	0.292629	0.380644		6.925	0.238186	0.36122	0.332665	0.270197	0.351645	0.370007	0.383132
6.975	0.4319	0.367395	0.377803	0.29665	0.379056		6.975	0.245971	0.363557	0.333134	0.267245	0.356716	0.353409	0.366346
7.025	0.41424	0.371466	0.379164	0.294764	0.374407		7.025	0.251224	0.367287	0.334843	0.264895	0.36521	0.364753	0.372873
7.075	0.411131	0.363415	0.375657	0.292623	0.365853		7.075	0.24978	0.359728	0.335624	0.260785	0.35877	0.370272	0.36875
7.125	0.399544	0.364063	0.379715	0.289837	0.365311		7.125	0.257564	0.357733	0.322313	0.260779	0.368318	0.367095	0.392502
7.175	0.374989	0.359091	0.374989	0.288984	0.362953		7.175	0.250776	0.355464	0.331679	0.259191	0.365615	0.388585	0.373345
7.225	0.377837	0.356217	0.369682	0.286344	0.359692		7.225	0.265005	0.350894	0.340621	0.257994	0.378414	0.384307	0.375765
7.275	0.374972	0.358106	0.389015	0.282242	0.35508		7.275	0.257413	0.356055	0.333822	0.259601	0.377123	0.379576	0.379683
7.325	0.359438	0.349876	0.380829	0.280374	0.348121		7.325	0.261501	0.353719	0.351504	0.257667	0.379777	0.393138	0.363208
7.375	0.363921	0.337324	0.363099	0.279964	0.347521		7.375	0.267085	0.348021	0.35817	0.259255	0.39758	0.396958	0.370234
7.425	0.359548	0.337916	0.352338	0.279676	0.347859		7.425	0.267156	0.35351	0.339412	0.259761	0.384104	0.404479	0.368848
7.475	0.361489	0.323735	0.360647	0.275619	0.347836		7.475	0.264965	0.352954	0.364941	0.259464	0.398934	0.402066	0.365446
7.525	0.361852	0.320521	0.361976	0.277349	0.352336		7.525	0.260459	0.355717	0.366586	0.260463	0.395196	0.405164	0.363347
7.575	0.365452	0.315093	0.357336	0.274653	0.343721		7.575	0.278955	0.354101	0.371723	0.265698	0.401653	0.406522	0.367665
7.625	0.36561	0.315605	0.37099	0.275184	0.351055		7.625	0.264144	0.360115	0.375359	0.263726	0.400577	0.409509	0.369413
7.675	0.373479	0.316739	0.361022	0.277239	0.34802		7.675	0.272554	0.356359	0.386176	0.267645	0.412288	0.413774	0.372281
7.725	0.365192	0.308214	0.35459	0.276532	0.34712		7.725	0.266605	0.354053	0.389706	0.269257	0.414015	0.411461	0.358965
7.775	0.378796	0.30771	0.34129	0.276497	0.354617		7.775	0.26839	0.34858	0.380158	0.271607	0.418699	0.427243	0.388912
7.825	0.375738	0.310882	0.363446	0.279294	0.349681		7.825	0.270173	0.355025	0.394789	0.274649	0.421063	0.425073	0.357223
7.875	0.382283	0.310903	0.345193	0.278927	0.356198		7.875	0.273189	0.362399	0.397756	0.277593	0.429113	0.425927	0.39275
7.925	0.390357	0.313974	0.369835	0.281449	0.353474		7.925	0.28041	0.35466	0.396011	0.279576	0.426322	0.438634	0.386687
7.975	0.394131	0.308992	0.355006	0.284482	0.353897		7.975	0.276968	0.352412	0.403375	0.281871	0.432264	0.438876	0.380966
8.025	0.390476	0.314188	0.361114	0.284461	0.361532		8.025	0.279725	0.355012	0.402747	0.28612	0.445695	0.445432	0.39201
8.075	0.390561	0.310276	0.354275	0.288149	0.361732		8.075	0.291421	0.354658	0.411734	0.290052	0.440539	0.434523	0.3902
8.125	0.400234	0.320741	0.35741	0.289101	0.362851		8.125	0.27728	0.351063	0.399307	0.293141	0.452235	0.451209	0.396956
8.175	0.396338	0.321313	0.345978	0.291204	0.36503		8.175	0.282344	0.356105	0.401406	0.296488	0.452885	0.454068	0.407318
8.225	0.393759	0.32082	0.35284	0.292757	0.362141		8.225	0.28524	0.352751	0.40405	0.300219	0.462582	0.450024	0.41886
8.275	0.384687	0.312326	0.364869	0.295623	0.367988		8.275	0.290576	0.352877	0.403613	0.305018	0.468673	0.456596	0.430506
8.325	0.385171	0.323872	0.361619	0.298132	0.365766		8.325	0.291692	0.350812	0.406007	0.307896	0.470349	0.46587	0.420057
8.375	0.395339	0.326145	0.373208	0.29861	0.372074		8.375	0.289369	0.354281	0.398458	0.309385	0.470947	0.466199	0.430145
8.425	0.384697	0.328158	0.3674	0.301007	0.373834		8.425	0.29634	0.360274	0.404876	0.313898	0.471457	0.457183	0.441158
8.475	0.386523	0.332126	0.366418	0.303225	0.376241		8.475	0.303295	0.348448	0.412588	0.314416	0.467639	0.466303	0.441077
8.525	0.379219	0.330303	0.369608	0.306683	0.3741		8.525	0.294366	0.350347	0.415918	0.317098	0.474442	0.466908	0.445821
8.575	0.381911	0.333873	0.371931	0.30896	0.376433		8.575	0.30668	0.351765	0.413001	0.319121	0.484355	0.462093	0.441404
8.625	0.383376	0.34049	0.381574	0.309553	0.381704		8.625	0.307633	0.349713	0.412779	0.319961	0.479059	0.476821	0.448442
8.675	0.378345	0.335827	0.386002	0.312805	0.384084		8.675	0.305865	0.345404	0.393877	0.322321	0.486116	0.479666	0.433724
8.725	0.378717	0.344908	0.381034	0.314265	0.379644		8.725	0.319742	0.350868	0.41023	0.324145	0.476371	0.47652	0.450271
8.775	0.382294	0.341721	0.385959	0.315674	0.38416		8.775	0.311501	0.352379	0.393565	0.325059	0.488332	0.478399	0.462748
8.825	0.38039	0.339254	0.379061	0.316697	0.38257		8.825	0.317817	0.351882	0.399899	0.326708	0.487054	0.484916	0.443023
8.875	0.377729	0.344097	0.397287	0.318817	0.386594		8.875	0.327555	0.349306	0.405349	0.329315	0.483803	0.485021	0.466353
8.925	0.379827	0.342269	0.399668	0.31807	0.389844		8.925	0.324756	0.35467	0.402769	0.329281	0.491011	0.481586	0.443072
8.975	0.385476	0.341566	0.403024	0.321276	0.382678		8.975	0.333261	0.349382	0.395578	0.331946	0.486887	0.479214	0.470559
9.025	0.377347	0.345015	0.403335	0.321318	0.387774		9.025	0.334033	0.35525	0.411131	0.332288	0.488091	0.488784	0.461202
9.075	0.382682	0.340538	0.397189	0.32359	0.386161		9.075	0.329139	0.354642	0.417837	0.332953	0.495921	0.487251	0.46076
9.125	0.383358	0.340936	0.405898	0.323725	0.380184		9.125	0.333192	0.351105	0.407678	0.334548	0.496467	0.485925	0.440302
9.175	0.375503	0.335322	0.390171	0.322133	0.387283		9.175	0.339533	0.358946	0.416741	0.335281	0.494725	0.49268	0.453788
9.225	0.371278	0.339197	0.390596	0.325408	0.384589		9.225	0.337	0.357769	0.422848	0.33595	0.504301	0.493356	0.45336
9.275	0.373738	0.337922	0.395828	0.324776	0.389625		9.275	0.343546	0.360181	0.413791	0.336352	0.500748	0.49691	0.450946
9.325	0.370444	0.335032	0.394435	0.326248	0.386048		9.325	0.341495	0.358701	0.419102	0.336479	0.50143	0.492926	0.431517
9.375	0.367306	0.335149	0.38783	0.326224	0.382817		9.375	0.348643	0.356293	0.419782	0.337824	0.504123	0.490476	0.469635
9.425	0.372474	0.339301	0.383568	0.327072	0.381683		9.425	0.345452	0.358462	0.417961	0.338944	0.499234	0.497963	0.451798
9.475	0.365881	0.336527	0.379373	0.327546	0.384067		9.475	0.35008	0.351254	0.417255	0.3387	0.493821	0.494293	0.468263
9.525	0.365316	0.333793	0.388077	0.329207	0.386819		9.525	0.348014	0.352793	0.426963	0.338576	0.501187	0.50184	0.44205
9.575	0.36187	0.336757	0.386343	0.331202	0.382803		9.575	0.350326	0.356672	0.419975	0.341887	0.498891	0.497352	0.454069
9.625	0.364822	0.33779	0.385539	0.331277	0.385414		9.625	0.355661	0.360077	0.405189	0.342954	0.498718	0.497103	0.471451
9.675	0.368097	0.340013	0.391439	0.332456	0.385635		9.675	0.352038	0.353582	0.403575	0.346413	0.509194	0.505848	0.450761
9.725	0.36074	0.341737	0.381381	0.335162	0.38682		9.725	0.354608	0.355258	0.39675	0.346391	0.499854	0.504718	0.470012
9.775	0.362622	0.345112	0.390707	0.336676	0.387908		9.775	0.348965	0.353723	0.406732	0.349009	0.496969	0.510438	0.456207
9.825	0.367371	0.343272	0.386887	0.3373	0.384874		9.825	0.351269	0.357621	0.411374	0.347854	0.509349	0.50894	0.45333
9.875	0.365204	0.34526	0.391734	0.338621	0.39305		9.875	0.352765	0.361222	0.4002	0.350823	0.504407	0.515463	0.458736
9.925	0.370941	0.342341	0.401622	0.34025	0.387511		9.925	0.351799	0.357328	0.390018	0.352146	0.507761	0.506701	0.464726
9.975	0.368413	0.351529	0.391649	0.341457	0.394698		9.975	0.350388	0.355434	0.400229	0.352017	0.506995	0.510086	0.468589
10.025	0.375746	0.35287	0.40088	0.341891	0.396004		10.025	0.353521	0.354144	0.391683	0.355606	0.507707	0.515374	0.471789
10.075	0.377633	0.352349	0.389682	0.34517	0.399249		10.075	0.355502	0.355386	0.401986	0.357347	0.507463	0.521365	0.455162
10.125	0.37116	0.356904	0.394859	0.34943	0.398194		10.125	0.357467	0.359488	0.414062	0.356949	0.511603	0.524708	0.47697
10.175	0.382469	0.351119	0.386695	0.350547	0.397277		10.175	0.351937	0.362107	0.410616	0.357196	0.515038	0.52368	0.480199
10.225	0.3939	0.355647	0.398376	0.351753	0.39783		10.225	0.352514	0.366299	0.410862	0.358003	0.514468	0.521271	0.47079
10.275	0.37916	0.353037	0.392303	0.353589	0.405062		10.275	0.355164	0.357561	0.411417	0.360296	0.509794	0.523561	0.48814
10.325	0.380306	0.359361	0.405655	0.355722	0.401678		10.325	0.360961	0.364024	0.413002	0.362743	0.517258	0.527636	0.474026
10.375	0.383292	0.357216	0.39756	0.357502	0.405765		10.375	0.355392	0.368309	0.413947	0.362579	0.513517	0.527755	0.474712
10.425	0.382697	0.357054	0.405896	0.360561	0.408847		10.425	0.35533	0.363746	0.425113	0.364197	0.520705	0.529872	0.504188
10.475	0.390027	0.355771	0.397207	0.359937	0.408507		10.475	0.357899	0.364832	0.401901	0.364451	0.509341	0.529481	0.483311
10.525	0.386457	0.360688	0.406882	0.363101	0.409152		10.525	0.360112	0.365216	0.416054	0.368877	0.516742	0.534883	0.481914
10.575	0.389625	0.36045	0.404873	0.365486	0.409731		10.575	0.357147	0.363459	0.42153	0.367994	0.526884	0.545686	0.493268
10.625	0.394592	0.363297	0.417822	0.365314	0.407395		10.625	0.354722	0.372393	0.417947	0.370588	0.519112	0.534712	0.506386
10.675	0.39206	0.363388	0.402648	0.368949	0.411862		10.675	0.361632	0.365293	0.417384	0.370377	0.519337	0.539547	0.487413
10.725	0.383588	0.362971	0.410496	0.369151	0.41218		10.725	0.359881	0.364424	0.417121	0.373373	0.528566	0.532639	0.503367
10.775	0.381373	0.364995	0.41022	0.371554	0.416607		10.775	0.35957	0.371484	0.419944	0.373994	0.528193	0.540396	0.491656
10.825	0.376694	0.364003	0.414267	0.3722	0.41604		10.825	0.362449	0.371932	0.42071	0.37733	0.530286	0.534621	0.511451
10.875	0.382466	0.373128	0.411481	0.376304	0.419708		10.875	0.355203	0.371127	0.422041	0.376298	0.534919	0.536136	0.509145
10.925	0.374795	0.369757	0.420906	0.375075	0.420347		10.925	0.361925	0.37043	0.415053	0.377506	0.525517	0.545759	0.502013
10.975	0.383026	0.369207	0.424343	0.377103	0.421979		10.975	0.355254	0.36863	0.421883	0.378686	0.531471	0.537259	0.492294
11.025	0.379908	0.366509	0.430777	0.378295	0.421727		11.025	0.357147	0.37026	0.418819	0.378557	0.530702	0.543542	0.495385
11.075	0.383963	0.373048	0.414414	0.379422	0.423032		11.075	0.359189	0.379473	0.424826	0.3826	0.530615	0.539658	0.498746
11.125	0.380862	0.371895	0.42227	0.380114	0.430443		11.125	0.358443	0.373965	0.42073	0.381419	0.536323	0.535479	0.512402
11.175	0.379759	0.372208	0.419912	0.381119	0.42548		11.175	0.359957	0.378675	0.430478	0.38288	0.53662	0.548507	0.501273
11.225	0.375301	0.369916	0.427547	0.382244	0.427013		11.225	0.360789	0.375275	0.421275	0.384243	0.533037	0.543139	0.508129
11.275	0.378381	0.371903	0.423209	0.383118	0.428239		11.275	0.35785	0.37081	0.424208	0.383479	0.5372	0.543483	0.496195
11.325	0.380402	0.370302	0.428722	0.383875	0.426837		11.325	0.362336	0.373857	0.424816	0.38605	0.534382	0.536802	0.514819
11.375	0.373248	0.380175	0.416727	0.387411	0.432878		11.375	0.363365	0.373279	0.422289	0.388483	0.531897	0.532072	0.507249
11.425	0.374853	0.372147	0.419791	0.389801	0.433078		11.425	0.370045	0.37431	0.425304	0.389286	0.530841	0.542128	0.507684
11.475	0.378488	0.375869	0.414104	0.390141	0.433083		11.475	0.365081	0.373478	0.427607	0.389651	0.529097	0.54035	0.5112
11.525	0.367632	0.375639	0.424436	0.392021	0.434133		11.525	0.376248	0.376946	0.43267	0.391556	0.527279	0.540474	0.512405
11.575	0.37145	0.375803	0.410561	0.39211	0.433838		11.575	0.368611	0.379644	0.435944	0.392794	0.527831	0.53849	0.51515
11.625	0.369654	0.374746	0.411475	0.395807	0.435107		11.625	0.376128	0.382474	0.424058	0.393389	0.529921	0.538274	0.504254
11.675	0.367978	0.375446	0.422607	0.394981	0.440433		11.675	0.373061	0.382884	0.433633	0.395073	0.52622	0.541708	0.493732
11.725	0.369534	0.376909	0.424092	0.39674	0.435061		11.725	0.374755	0.380273	0.440567	0.39766	0.525252	0.539253	0.505338
11.775	0.371152	0.380965	0.415053	0.397452	0.438388		11.775	0.3769	0.383783	0.427775	0.396431	0.533584	0.537635	0.507976
11.825	0.374344	0.384069	0.420582	0.398608	0.440881		11.825	0.369914	0.382283	0.433853	0.399004	0.527305	0.536811	0.505103
11.875	0.371899	0.378317	0.421952	0.401476	0.440897		11.875	0.37118	0.384644	0.428506	0.401169	0.529038	0.536043	0.518571
11.925	0.369879	0.383181	0.420108	0.401068	0.44188		11.925	0.379953	0.384234	0.439508	0.40275	0.532113	0.539814	0.522071
11.975	0.368174	0.381229	0.422364	0.40221	0.443521		11.975	0.37763	0.388012	0.443472	0.404004	0.536536	0.5437	0.498924
12.025	0.373186	0.383876	0.423006	0.405357	0.44598		12.025	0.375333	0.386518	0.437498	0.404192	0.53423	0.550274	0.508056
12.075	0.373683	0.382595	0.424785	0.405068	0.450802		12.075	0.379642	0.385751	0.441964	0.406476	0.530976	0.539977	0.50347
12.125	0.369552	0.385175	0.426376	0.407101	0.44745		12.125	0.37756	0.38237	0.435015	0.408229	0.539104	0.545496	0.504702
12.175	0.377661	0.38237	0.426642	0.407271	0.450541		12.175	0.377321	0.384947	0.443302	0.409068	0.532952	0.541768	0.516654
12.225	0.37612	0.387238	0.42703	0.409786	0.449997		12.225	0.372514	0.388487	0.442516	0.408231	0.528564	0.543199	0.511964
12.275	0.374779	0.385689	0.424355	0.410335	0.449173		12.275	0.376898	0.385603	0.437185	0.410448	0.533407	0.541499	0.501714
12.325	0.368215	0.384824	0.430022	0.411344	0.451102		12.325	0.379951	0.389655	0.438708	0.411217	0.535127	0.54934	0.516138
12.375	0.380941	0.386016	0.426048	0.413616	0.453789		12.375	0.377097	0.386101	0.434341	0.414587	0.538072	0.549978	0.505433
12.425	0.3791	0.388175	0.436931	0.415116	0.454847		12.425	0.3748	0.392029	0.439353	0.41477	0.535944	0.550442	0.522763
12.475	0.377488	0.388976	0.436247	0.416336	0.453063		12.475	0.383123	0.391069	0.4401	0.417074	0.537188	0.543753	0.506521
12.525	0.382186	0.389323	0.441811	0.417943	0.459037		12.525	0.375778	0.395924	0.432411	0.41681	0.536092	0.551726	0.517148
12.575	0.382366	0.3948	0.436698	0.417912	0.45898		12.575	0.385774	0.395198	0.443436	0.419032	0.542636	0.549935	0.515988
12.625	0.376894	0.392374	0.435105	0.418899	0.45969		12.625	0.383053	0.399524	0.443428	0.421466	0.543269	0.554247	0.517841
12.675	0.378435	0.394568	0.442615	0.420446	0.461085		12.675	0.390828	0.394365	0.438926	0.422736	0.540098	0.548126	0.518946
12.725	0.381509	0.392881	0.437793	0.421542	0.464861		12.725	0.382086	0.394758	0.440799	0.423294	0.547662	0.551897	0.534746
12.775	0.384178	0.393975	0.438437	0.422582	0.464208		12.775	0.384956	0.393869	0.450888	0.424896	0.541377	0.547067	0.518722
12.825	0.387909	0.393167	0.432022	0.424126	0.470899		12.825	0.385882	0.40065	0.439314	0.426043	0.538434	0.551492	0.529614
12.875	0.383767	0.396982	0.431099	0.425167	0.468618		12.875	0.386953	0.400675	0.434462	0.425666	0.543828	0.549685	0.530446
12.925	0.388828	0.395398	0.432416	0.425796	0.465506		12.925	0.38621	0.397438	0.449902	0.428478	0.54713	0.549783	0.530405
12.975	0.387374	0.399449	0.442208	0.427264	0.468151		12.975	0.395836	0.400455	0.446274	0.429512	0.547599	0.557272	0.534455
13.025	0.391615	0.402223	0.445848	0.428304	0.473328		13.025	0.396463	0.401814	0.444434	0.429567	0.545499	0.550806	0.530609
13.075	0.394844	0.403712	0.434067	0.429564	0.471839		13.075	0.3953	0.405236	0.454249	0.431873	0.547047	0.555681	0.522019
13.125	0.393015	0.405166	0.43609	0.429994	0.470924		13.125	0.396577	0.409287	0.447518	0.431263	0.546704	0.555158	0.51723
13.175	0.391664	0.400884	0.445428	0.430474	0.472397		13.175	0.407927	0.408388	0.454209	0.43436	0.547083	0.554139	0.526319
13.225	0.396669	0.402997	0.451144	0.432444	0.476159		13.225	0.402474	0.409154	0.453847	0.433639	0.551716	0.554976	0.53921
13.275	0.401027	0.406238	0.440985	0.433631	0.476598		13.275	0.403314	0.410303	0.454678	0.435703	0.546158	0.552388	0.542843
13.325	0.39487	0.407572	0.450319	0.434593	0.477384		13.325	0.40161	0.409944	0.452147	0.437072	0.550397	0.551128	0.532737
13.375	0.395605	0.411145	0.451533	0.434149	0.479086		13.375	0.404473	0.414761	0.454847	0.438439	0.552979	0.558185	0.524817
13.425	0.395508	0.410895	0.445593	0.436774	0.4783		13.425	0.408491	0.410943	0.454949	0.439652	0.548946	0.549838	0.544091
13.475	0.400117	0.413459	0.451929	0.438211	0.483518		13.475	0.40904	0.415718	0.443224	0.439791	0.550288	0.549667	0.537263
13.525	0.395673	0.41468	0.448208	0.439231	0.479942		13.525	0.419268	0.411998	0.450715	0.441223	0.554065	0.55334	0.54541
13.575	0.395571	0.416343	0.454714	0.439207	0.480736		13.575	0.415003	0.418063	0.457088	0.442419	0.552457	0.555443	0.533818
13.625	0.40405	0.415024	0.455602	0.441225	0.482881		13.625	0.415178	0.417433	0.466662	0.443122	0.552195	0.552636	0.538801
13.675	0.397957	0.415651	0.458539	0.442569	0.485181		13.675	0.421289	0.419192	0.464727	0.443208	0.557371	0.557522	0.534567
13.725	0.402304	0.418898	0.468914	0.443249	0.483668		13.725	0.418375	0.422148	0.468614	0.444387	0.550366	0.558082	0.534499
13.775	0.403777	0.420519	0.448262	0.444796	0.48522		13.775	0.419168	0.418162	0.465516	0.446236	0.554305	0.557771	0.533675
13.825	0.404504	0.417233	0.450784	0.44599	0.490953		13.825	0.420191	0.423867	0.464923	0.448589	0.559665	0.556815	0.556697
13.875	0.406749	0.420547	0.467553	0.446798	0.490746		13.875	0.426446	0.428046	0.462018	0.448333	0.556431	0.559011	0.533121
13.925	0.40296	0.422794	0.462382	0.447458	0.494817		13.925	0.419938	0.42238	0.472206	0.451018	0.556721	0.562368	0.537668
13.975	0.404489	0.424099	0.468978	0.449117	0.491459		13.975	0.417062	0.429446	0.472735	0.450762	0.553395	0.561213	0.548135
14.025	0.402137	0.422327	0.461694	0.450522	0.495827		14.025	0.428995	0.427228	0.470016	0.453491	0.551766	0.561738	0.545022
14.075	0.40959	0.425897	0.462373	0.45207	0.495956		14.075	0.424691	0.43131	0.46914	0.452975	0.552882	0.563766	0.536171
14.125	0.408558	0.426608	0.46052	0.452146	0.497814		14.125	0.425812	0.424432	0.47601	0.455166	0.55469	0.562074	0.543698
14.175	0.406617	0.42718	0.47192	0.454651	0.497392		14.175	0.431623	0.434117	0.479295	0.455471	0.561557	0.564886	0.55834
14.225	0.412179	0.427391	0.466133	0.456572	0.497116		14.225	0.423473	0.427455	0.474467	0.458013	0.558481	0.556556	0.540753
14.275	0.406434	0.427385	0.475789	0.457173	0.498047		14.275	0.429178	0.432147	0.478628	0.458755	0.561764	0.564922	0.544035
14.325	0.410593	0.426925	0.460507	0.458497	0.501159		14.325	0.428211	0.433664	0.486433	0.459784	0.561054	0.560696	0.545815
14.375	0.411338	0.428793	0.471377	0.457547	0.502378		14.375	0.433237	0.437755	0.483089	0.46182	0.564519	0.56568	0.538814
14.425	0.410594	0.430938	0.475304	0.460137	0.501337		14.425	0.426092	0.435184	0.477745	0.462818	0.563759	0.568547	0.555702
14.475	0.414744	0.430981	0.478896	0.461076	0.49881		14.475	0.435431	0.435841	0.48196	0.463568	0.559413	0.564801	0.553486
14.525	0.418114	0.432104	0.466809	0.46176	0.504837		14.525	0.431922	0.435675	0.482761	0.462596	0.568464	0.565214	0.555033
14.575	0.409648	0.432405	0.473476	0.463033	0.506778		14.575	0.432892	0.438261	0.481414	0.465907	0.564504	0.574881	0.550767
14.625	0.417518	0.436934	0.470739	0.465312	0.507991		14.625	0.432652	0.439157	0.478689	0.466601	0.565547	0.570389	0.553407
14.675	0.412538	0.433851	0.478873	0.46591	0.504917		14.675	0.434389	0.440091	0.481101	0.467413	0.565736	0.572341	0.551608
14.725	0.411888	0.440351	0.472665	0.467992	0.512724		14.725	0.43256	0.443555	0.479108	0.46933	0.565753	0.572457	0.544744
14.775	0.42309	0.439017	0.480267	0.46737	0.512286		14.775	0.438392	0.445432	0.478845	0.470009	0.564322	0.569494	0.560134
14.825	0.419727	0.435675	0.482651	0.469794	0.511918		14.825	0.432798	0.448764	0.483165	0.47117	0.564298	0.569845	0.564323
14.875	0.418653	0.439845	0.470547	0.470756	0.512193		14.875	0.439824	0.441562	0.490828	0.472978	0.569745	0.569643	0.563725
14.925	0.422505	0.441299	0.48916	0.471331	0.514123		14.925	0.437824	0.447605	0.488875	0.472893	0.568139	0.574613	0.557167
14.975	0.417234	0.440671	0.479921	0.472184	0.514746		14.975	0.446987	0.448483	0.485899	0.473532	0.572318	0.575653	0.559368
15.025	0.423442	0.443888	0.486265	0.474054	0.518747		15.025	0.448536	0.446975	0.487828	0.475849	0.569766	0.570278	0.559339
15.075	0.421507	0.44689	0.482796	0.475024	0.515571		15.075	0.445175	0.445304	0.49031	0.47566	0.567619	0.573742	0.562465
15.125	0.420267	0.446541	0.482663	0.476286	0.519358		15.125	0.447859	0.44767	0.494321	0.476995	0.570954	0.577024	0.565846
15.175	0.423079	0.448364	0.489292	0.476563	0.520019		15.175	0.449254	0.454351	0.495543	0.478147	0.571218	0.580385	0.566904
15.225	0.424323	0.44917	0.489128	0.478989	0.520112		15.225	0.445578	0.449208	0.494181	0.479237	0.569384	0.57714	0.559534
15.275	0.423706	0.449426	0.484661	0.47945	0.519577		15.275	0.44327	0.456219	0.499418	0.480699	0.575134	0.57667	0.566824
15.325	0.420225	0.448098	0.4934	0.480403	0.523851		15.325	0.448417	0.454763	0.505808	0.48092	0.570858	0.581145	0.54835
15.375	0.424381	0.453325	0.495957	0.481997	0.524986		15.375	0.446375	0.452866	0.496823	0.483389	0.572345	0.57841	0.55828
15.425	0.423374	0.451093	0.489337	0.483196	0.52795		15.425	0.448468	0.454743	0.498085	0.482674	0.578248	0.578687	0.573587
15.475	0.420427	0.455508	0.497612	0.485179	0.529564		15.475	0.450861	0.455001	0.493634	0.482527	0.575767	0.578501	0.568884
15.525	0.42067	0.450849	0.495729	0.484128	0.527207		15.525	0.448481	0.457623	0.499359	0.485268	0.577451	0.583844	0.567334
15.575	0.425575	0.454886	0.496594	0.484908	0.528407		15.575	0.451373	0.461733	0.502732	0.486459	0.577973	0.576448	0.560148
15.625	0.426882	0.458053	0.497496	0.484592	0.53058		15.625	0.456548	0.45776	0.496485	0.48713	0.573378	0.579262	0.572522
15.675	0.427265	0.451487	0.502339	0.488281	0.526673		15.675	0.453033	0.460225	0.503431	0.48901	0.579983	0.58112	0.554517
15.725	0.425294	0.45711	0.497409	0.489652	0.531272		15.725	0.455537	0.455179	0.50363	0.490572	0.577613	0.58041	0.564237
15.775	0.428537	0.456634	0.504298	0.490401	0.532729		15.775	0.458487	0.46138	0.507814	0.48968	0.57964	0.581625	0.563047
15.825	0.434699	0.461373	0.499877	0.492384	0.536868		15.825	0.459603	0.462422	0.512499	0.491571	0.579228	0.578924	0.567327
15.875	0.425003	0.458411	0.506532	0.491455	0.534713		15.875	0.45892	0.461745	0.507428	0.49189	0.577747	0.586661	0.571767
15.925	0.430611	0.460665	0.508031	0.493102	0.536247		15.925	0.454883	0.46349	0.506055	0.493629	0.584252	0.587568	0.566012
15.975	0.43168	0.462133	0.505049	0.493112	0.538853		15.975	0.456716	0.463077	0.505906	0.495102	0.583155	0.58331	0.577515
16.025	0.434962	0.463159	0.509266	0.493809	0.538093		16.025	0.462553	0.460716	0.503716	0.495716	0.583621	0.583841	0.568257
16.075	0.432151	0.463988	0.507605	0.496238	0.542982		16.075	0.464454	0.463072	0.513448	0.496709	0.57969	0.582639	0.570024
16.125	0.436042	0.463978	0.509834	0.495543	0.540627		16.125	0.466525	0.464221	0.507718	0.497245	0.587466	0.584817	0.561285
16.175	0.436245	0.463587	0.516558	0.496945	0.54434		16.175	0.466065	0.463878	0.515857	0.497991	0.587334	0.583408	0.569956
16.225	0.438278	0.468775	0.516837	0.498819	0.545342		16.225	0.465754	0.466417	0.511958	0.500229	0.585725	0.586529	0.571005
16.275	0.438271	0.46394	0.513826	0.499013	0.546574		16.275	0.4662	0.471022	0.520645	0.500342	0.589303	0.587193	0.56894
16.325	0.438608	0.467669	0.514972	0.500985	0.545074		16.325	0.469688	0.466927	0.517884	0.501457	0.59183	0.58878	0.581293
16.375	0.440898	0.469189	0.5197	0.501008	0.546765		16.375	0.47359	0.469983	0.518358	0.503234	0.585737	0.592642	0.575959
16.425	0.438985	0.471584	0.522948	0.501824	0.548225		16.425	0.471997	0.471021	0.521719	0.501772	0.583599	0.584614	0.585221
16.475	0.43915	0.46503	0.519285	0.502921	0.548773		16.475	0.470488	0.469246	0.530437	0.505064	0.590637	0.591448	0.589057
16.525	0.440062	0.471403	0.522529	0.503808	0.55203		16.525	0.474894	0.473144	0.517853	0.505411	0.588329	0.590138	0.579658
16.575	0.442359	0.467931	0.521616	0.50568	0.55244		16.575	0.467968	0.471558	0.522387	0.507238	0.598079	0.591637	0.567537
16.625	0.442732	0.473227	0.519428	0.506158	0.552176		16.625	0.47445	0.473455	0.522287	0.50838	0.588911	0.59657	0.574084
16.675	0.441096	0.471127	0.527965	0.507194	0.551823		16.675	0.472653	0.475047	0.519921	0.507677	0.590308	0.596306	0.580137
16.725	0.44645	0.476728	0.52055	0.508959	0.555357		16.725	0.479763	0.471505	0.528016	0.510077	0.592706	0.59427	0.577178
16.775	0.444428	0.47119	0.530816	0.508714	0.556952		16.775	0.477724	0.474484	0.530013	0.510241	0.594323	0.592377	0.57971
16.825	0.445845	0.475526	0.530706	0.509543	0.556792		16.825	0.478107	0.477773	0.534046	0.512613	0.592471	0.591015	0.582002
16.875	0.448179	0.477264	0.532621	0.510847	0.553948		16.875	0.481975	0.475686	0.535297	0.513332	0.59178	0.595398	0.588767
16.925	0.44473	0.477866	0.531819	0.511957	0.557832		16.925	0.479343	0.476032	0.533173	0.513857	0.595422	0.597609	0.579382
16.975	0.449541	0.47721	0.533098	0.512988	0.561273		16.975	0.482456	0.480299	0.534053	0.513847	0.59762	0.595622	0.582977
17.025	0.450443	0.478463	0.522157	0.514052	0.563053		17.025	0.478792	0.478231	0.539757	0.516721	0.594446	0.606131	0.572742
17.075	0.452084	0.47918	0.527114	0.515672	0.562075		17.075	0.479421	0.483201	0.533842	0.515985	0.600427	0.598859	0.571086
17.125	0.449993	0.481509	0.541508	0.516499	0.559563		17.125	0.48317	0.482005	0.542687	0.517695	0.598379	0.601709	0.585512
17.175	0.450981	0.477914	0.540775	0.516428	0.56292		17.175	0.479746	0.485789	0.540871	0.51814	0.599235	0.602086	0.584165
17.225	0.452663	0.48001	0.537854	0.517737	0.566143		17.225	0.479655	0.483164	0.540732	0.51921	0.596018	0.601754	0.584774
17.275	0.459992	0.484728	0.538221	0.519432	0.568317		17.275	0.484219	0.48734	0.540372	0.520318	0.601245	0.600233	0.580117
17.325	0.454254	0.484517	0.537093	0.519871	0.567948		17.325	0.485727	0.493782	0.544851	0.519955	0.602086	0.603262	0.591818
17.375	0.451799	0.483041	0.546254	0.521101	0.56589		17.375	0.482161	0.48801	0.54588	0.522831	0.602945	0.603992	0.57991
17.425	0.458118	0.487023	0.540009	0.521429	0.570485		17.425	0.487604	0.486837	0.549653	0.522981	0.603738	0.599741	0.588112
17.475	0.456394	0.485491	0.545888	0.522412	0.567956		17.475	0.490653	0.488882	0.549493	0.523677	0.599086	0.608134	0.593162
17.525	0.461512	0.489758	0.538918	0.524312	0.572456		17.525	0.485206	0.490868	0.544685	0.526131	0.606259	0.604816	0.596858
17.575	0.459514	0.488726	0.545428	0.52569	0.571176		17.575	0.489942	0.489175	0.549722	0.526677	0.605318	0.610161	0.602376
17.625	0.455533	0.485901	0.553331	0.526056	0.56927		17.625	0.487205	0.492093	0.55717	0.525853	0.60545	0.612301	0.596056
17.675	0.463845	0.487763	0.552915	0.527539	0.572612		17.675	0.493835	0.496915	0.55558	0.52787	0.606763	0.611027	0.581937
17.725	0.460948	0.489631	0.548497	0.529004	0.572701		17.725	0.492516	0.496161	0.554134	0.528931	0.608439	0.60639	0.592179
17.775	0.461648	0.491862	0.54325	0.528894	0.573556		17.775	0.496793	0.498988	0.55321	0.529294	0.606718	0.613078	0.596847
17.825	0.462245	0.490172	0.546336	0.52779	0.576206		17.825	0.496522	0.502424	0.553042	0.531027	0.610913	0.611713	0.588618
17.875	0.464079	0.497422	0.554347	0.53144	0.576171		17.875	0.496588	0.493318	0.553596	0.531358	0.611131	0.613419	0.600257
17.925	0.464554	0.492543	0.555958	0.532737	0.574654		17.925	0.496419	0.499773	0.556266	0.53319	0.61124	0.613436	0.594585
17.975	0.471509	0.495061	0.552302	0.532365	0.580677		17.975	0.497903	0.49785	0.555992	0.53359	0.612063	0.612989	0.597004
18.025	0.466479	0.494544	0.552195	0.533554	0.580824		18.025	0.495095	0.499335	0.561642	0.53423	0.612833	0.615682	0.586921
18.075	0.467429	0.497918	0.556207	0.535289	0.583615		18.075	0.497951	0.498669	0.563787	0.536916	0.609948	0.613343	0.597198
18.125	0.469908	0.497944	0.553701	0.536314	0.579927		18.125	0.497379	0.501275	0.562141	0.537017	0.609328	0.617258	0.602284
18.175	0.467725	0.496634	0.552688	0.536835	0.583964		18.175	0.503227	0.503844	0.561381	0.537471	0.608663	0.61766	0.599145
18.225	0.470331	0.499129	0.559325	0.537674	0.580293		18.225	0.503723	0.502691	0.563828	0.538526	0.615814	0.619077	0.600493
18.275	0.470803	0.501043	0.557747	0.537428	0.581071		18.275	0.503373	0.50218	0.564888	0.538685	0.615567	0.612288	0.596536
18.325	0.473561	0.500375	0.559456	0.539494	0.583379		18.325	0.500197	0.50556	0.562188	0.540509	0.617785	0.618154	0.60295
18.375	0.475069	0.504985	0.562852	0.540943	0.583719		18.375	0.50345	0.504072	0.563458	0.540793	0.618949	0.621549	0.607489
18.425	0.474475	0.503617	0.56163	0.540989	0.584897		18.425	0.505388	0.506181	0.566515	0.541481	0.618064	0.621406	0.604654
18.475	0.474791	0.504228	0.565086	0.542047	0.586911		18.475	0.507228	0.507332	0.565499	0.543004	0.618559	0.621148	0.609158
18.525	0.471231	0.505337	0.569359	0.543211	0.590267		18.525	0.501533	0.506786	0.564301	0.54361	0.621755	0.627652	0.607396
18.575	0.475746	0.507849	0.566686	0.544284	0.588532		18.575	0.506327	0.510127	0.565868	0.544958	0.621095	0.616228	0.599917
18.625	0.480585	0.512292	0.569485	0.545549	0.586172		18.625	0.50639	0.512023	0.57636	0.545908	0.618286	0.623257	0.607603
18.675	0.476424	0.507299	0.570608	0.546229	0.590045		18.675	0.509046	0.510225	0.565894	0.546573	0.622327	0.619924	0.61281
18.725	0.481919	0.511671	0.571931	0.547512	0.593974		18.725	0.51284	0.509008	0.573763	0.547954	0.624514	0.623315	0.5994
18.775	0.478728	0.512503	0.571351	0.548358	0.589708		18.775	0.513258	0.512071	0.575775	0.549738	0.624891	0.62393	0.607461
18.825	0.478445	0.514979	0.567245	0.549572	0.589986		18.825	0.513914	0.511089	0.571187	0.549316	0.62692	0.627326	0.601849
18.875	0.48299	0.512815	0.567214	0.550084	0.593602		18.875	0.510697	0.514789	0.577156	0.551135	0.624237	0.622145	0.609795
18.925	0.480993	0.517086	0.572909	0.55014	0.593292		18.925	0.514666	0.516116	0.575234	0.550577	0.625868	0.627373	0.612527
18.975	0.480657	0.512356	0.575009	0.551662	0.596654		18.975	0.514813	0.514581	0.569894	0.552016	0.627418	0.628108	0.615378
19.025	0.486464	0.515875	0.575382	0.551734	0.596414		19.025	0.517658	0.521321	0.576064	0.552726	0.625871	0.626784	0.605247
19.075	0.484227	0.518228	0.578536	0.553131	0.596638		19.075	0.515856	0.517362	0.5733	0.553733	0.629832	0.626566	0.609757
19.125	0.487743	0.519777	0.581244	0.555315	0.597664		19.125	0.52208	0.521184	0.574744	0.555168	0.631867	0.630555	0.615099
19.175	0.487685	0.520371	0.582535	0.555856	0.59952		19.175	0.518593	0.522077	0.575703	0.555788	0.624707	0.632583	0.613968
19.225	0.488537	0.52017	0.582277	0.557045	0.601865		19.225	0.523623	0.520581	0.579165	0.555885	0.634825	0.635062	0.601921
19.275	0.492969	0.520806	0.579431	0.556398	0.600815		19.275	0.522332	0.524475	0.580551	0.556985	0.629629	0.638236	0.619237
19.325	0.493784	0.522672	0.586469	0.557806	0.599933		19.325	0.523076	0.52105	0.583994	0.558855	0.62865	0.63227	0.619816
19.375	0.493106	0.529532	0.5854	0.560225	0.602807		19.375	0.52328	0.520683	0.582149	0.55916	0.630221	0.633529	0.621019
19.425	0.496654	0.527085	0.585925	0.560133	0.601932		19.425	0.526808	0.526786	0.583793	0.560438	0.632195	0.635343	0.616554
19.475	0.500668	0.527296	0.584929	0.560278	0.602944		19.475	0.525691	0.527296	0.580855	0.560793	0.634526	0.632941	0.614248
19.525	0.497503	0.528984	0.588027	0.560257	0.604245		19.525	0.528797	0.528596	0.586231	0.561847	0.63513	0.639069	0.614771
19.575	0.495013	0.529509	0.584898	0.562302	0.604928		19.575	0.526541	0.528732	0.587052	0.56302	0.633083	0.638261	0.619589
19.625	0.501667	0.531983	0.583918	0.564546	0.603895		19.625	0.529326	0.528308	0.58793	0.563402	0.63568	0.640054	0.626585
19.675	0.505378	0.530926	0.591617	0.564695	0.607004		19.675	0.527744	0.527937	0.584854	0.56483	0.637323	0.636142	0.628472
19.725	0.500897	0.530297	0.5933	0.565666	0.608424		19.725	0.531123	0.53014	0.588676	0.564043	0.636729	0.639551	0.620829
19.775	0.508062	0.532654	0.586659	0.566319	0.611604		19.775	0.531421	0.532654	0.591386	0.567019	0.63814	0.642571	0.624261
19.825	0.505036	0.53418	0.589053	0.567984	0.60979		19.825	0.531103	0.532324	0.589717	0.568062	0.638458	0.640325	0.618567
19.875	0.510155	0.534177	0.588647	0.568089	0.610382		19.875	0.535293	0.534584	0.591077	0.56764	0.642337	0.643688	0.630891
19.925	0.507799	0.534868	0.595241	0.568597	0.612183		19.925	0.5359	0.534655	0.586017	0.568995	0.639864	0.643319	0.635407
19.975	0.509587	0.537195	0.595589	0.569429	0.612003		19.975	0.533756	0.536857	0.592388	0.569135	0.640803	0.646143	0.62604
20.025	0.514318	0.535576	0.59297	0.57158	0.612018		20.025	0.542516	0.535506	0.598038	0.571217	0.638874	0.642048	0.627669
20.075	0.51337	0.536155	0.596953	0.571689	0.614137		20.075	0.534765	0.539172	0.594695	0.570739	0.643819	0.643252	0.629869
20.125	0.508895	0.539417	0.595559	0.5716	0.613937		20.125	0.539378	0.537611	0.599653	0.572224	0.642721	0.644979	0.61636
20.175	0.517389	0.538128	0.601919	0.572356	0.617195		20.175	0.5376	0.539931	0.598487	0.574267	0.642812	0.647541	0.61213
20.225	0.514017	0.536994	0.604639	0.573214	0.615699		20.225	0.540179	0.538629	0.598274	0.573898	0.639093	0.642577	0.632669
20.275	0.518511	0.536683	0.594452	0.574043	0.616692		20.275	0.540362	0.543734	0.59864	0.574517	0.645117	0.647603	0.624815
20.325	0.517534	0.537893	0.601164	0.576079	0.616037		20.325	0.549233	0.539769	0.601625	0.576302	0.644386	0.648759	0.629807
20.375	0.522431	0.542091	0.601616	0.576986	0.618796		20.375	0.544142	0.542243	0.606256	0.576402	0.645449	0.648278	0.63328
20.425	0.517621	0.540601	0.597169	0.57678	0.618968		20.425	0.545743	0.543239	0.597998	0.576808	0.645547	0.648882	0.625312
20.475	0.517968	0.537643	0.59944	0.577572	0.622339		20.475	0.545255	0.544696	0.605246	0.579297	0.647764	0.648013	0.624753
20.525	0.522058	0.543313	0.603088	0.579095	0.621402		20.525	0.552641	0.543097	0.608448	0.58005	0.649335	0.651177	0.629551
20.575	0.519257	0.544645	0.600061	0.579191	0.620422		20.575	0.543891	0.543825	0.602977	0.580549	0.653276	0.65239	0.621328
20.625	0.522459	0.542554	0.597437	0.579927	0.622753		20.625	0.547219	0.545662	0.608318	0.580948	0.649662	0.650299	0.623362
20.675	0.524469	0.542523	0.607822	0.58175	0.625431		20.675	0.547952	0.546698	0.60736	0.582218	0.650089	0.655027	0.629891
20.725	0.521931	0.543548	0.60642	0.582942	0.626019		20.725	0.550606	0.548855	0.60141	0.583401	0.650333	0.656411	0.634642
20.775	0.52789	0.545713	0.603897	0.582794	0.624918		20.775	0.552817	0.547625	0.607968	0.585071	0.652359	0.658454	0.630545
20.825	0.525596	0.548888	0.60759	0.584421	0.625805		20.825	0.55459	0.547932	0.608338	0.584821	0.651586	0.655322	0.629798
20.875	0.525651	0.54815	0.611645	0.58534	0.628115		20.875	0.555185	0.550332	0.613281	0.584381	0.654298	0.658922	0.63093
20.925	0.525258	0.547418	0.615607	0.585936	0.626351		20.925	0.555555	0.55012	0.61725	0.587063	0.651265	0.659329	0.631496
20.975	0.530936	0.547313	0.611055	0.586858	0.627378		20.975	0.556676	0.550491	0.612162	0.586506	0.655156	0.656734	0.642634
21.025	0.531234	0.550862	0.615734	0.586826	0.627389		21.025	0.556576	0.552099	0.613356	0.588599	0.656398	0.659022	0.646987
21.075	0.533418	0.546897	0.611958	0.588462	0.633996		21.075	0.561355	0.552401	0.611339	0.589132	0.658294	0.659711	0.632769
21.125	0.533025	0.549001	0.619057	0.589384	0.631332		21.125	0.562739	0.551681	0.615737	0.590125	0.661538	0.661108	0.637493
21.175	0.532515	0.554657	0.616861	0.590326	0.63028		21.175	0.562009	0.555446	0.619599	0.590881	0.658896	0.659261	0.636185
21.225	0.535752	0.551883	0.614334	0.59091	0.633767		21.225	0.560877	0.554505	0.616637	0.592025	0.661784	0.6604	0.64262
21.275	0.535783	0.553738	0.622191	0.59207	0.634547		21.275	0.564221	0.552813	0.62099	0.592239	0.662437	0.658846	0.641598
21.325	0.535931	0.554639	0.617958	0.592501	0.633597		21.325	0.560213	0.557461	0.618501	0.593135	0.659074	0.658162	0.641634
21.375	0.536886	0.55678	0.622822	0.593547	0.63543		21.375	0.56747	0.559166	0.620398	0.59306	0.661659	0.66164	0.639872
21.425	0.54296	0.558498	0.620103	0.594276	0.63546		21.425	0.572229	0.560253	0.61769	0.594692	0.659798	0.659847	0.64854
21.475	0.538487	0.555326	0.621503	0.595743	0.634805		21.475	0.566839	0.55897	0.618091	0.595717	0.663632	0.665817	0.6331
21.525	0.540618	0.559122	0.622457	0.595177	0.636542		21.525	0.562338	0.562458	0.618193	0.59519	0.665407	0.663757	0.646091
21.575	0.540459	0.559518	0.622243	0.597274	0.637938		21.575	0.568552	0.558259	0.622758	0.59752	0.665437	0.665231	0.643222
21.625	0.544219	0.556706	0.624061	0.597345	0.639384		21.625	0.5721	0.558884	0.625766	0.598413	0.66275	0.666715	0.647342
21.675	0.543053	0.55921	0.629941	0.598994	0.641508		21.675	0.571797	0.560883	0.624249	0.599488	0.660303	0.66822	0.643428
21.725	0.546795	0.55973	0.624713	0.599328	0.641353		21.725	0.579163	0.560494	0.628465	0.598877	0.665937	0.673305	0.647645
21.775	0.544902	0.560876	0.629168	0.600475	0.63978		21.775	0.571481	0.563353	0.62527	0.60074	0.66652	0.66952	0.651817
21.825	0.545618	0.563177	0.623934	0.602209	0.644261		21.825	0.575375	0.564695	0.628585	0.601192	0.667718	0.670218	0.64836
21.875	0.545594	0.56472	0.626408	0.602218	0.641086		21.875	0.577736	0.56443	0.628325	0.602548	0.668544	0.667022	0.647021
21.925	0.546983	0.563471	0.632141	0.603317	0.644274		21.925	0.577913	0.565119	0.632375	0.603504	0.66861	0.669467	0.644279
21.975	0.544429	0.5659	0.62877	0.603426	0.642897		21.975	0.580271	0.566862	0.628537	0.603786	0.667639	0.667336	0.641
22.025	0.545848	0.568042	0.63178	0.604894	0.643192		22.025	0.576501	0.568565	0.627097	0.604723	0.669551	0.671174	0.64618
22.075	0.549633	0.569249	0.632209	0.605735	0.64571		22.075	0.577682	0.573112	0.630804	0.605893	0.670564	0.673501	0.65038
22.125	0.550736	0.568072	0.634529	0.605945	0.648345		22.125	0.580757	0.566741	0.633174	0.606112	0.671705	0.674121	0.649433
22.175	0.553029	0.569813	0.630982	0.607268	0.64961		22.175	0.58256	0.569663	0.633292	0.607705	0.674103	0.669586	0.647713
22.225	0.556533	0.570184	0.633674	0.607248	0.647254		22.225	0.578693	0.568408	0.634988	0.607878	0.674948	0.672228	0.646716
22.275	0.55236	0.57227	0.6349	0.608646	0.649982		22.275	0.582258	0.568485	0.63982	0.609107	0.668719	0.671341	0.650499
22.325	0.551757	0.571634	0.633517	0.610767	0.650876		22.325	0.586237	0.572044	0.6322	0.610026	0.673796	0.675823	0.659679
22.375	0.552817	0.571255	0.635861	0.609349	0.650107		22.375	0.586391	0.572383	0.634593	0.610077	0.674774	0.675445	0.655268
22.425	0.552076	0.574457	0.639006	0.610721	0.652944		22.425	0.583049	0.57355	0.631205	0.61059	0.672324	0.676701	0.656587
22.475	0.551065	0.572329	0.635607	0.61179	0.652599		22.475	0.588128	0.575755	0.638387	0.612022	0.673621	0.673453	0.662441
22.525	0.55856	0.576432	0.63379	0.613023	0.654133		22.525	0.586371	0.576577	0.637447	0.613416	0.676658	0.677726	0.658418
22.575	0.553412	0.574197	0.633948	0.614059	0.652547		22.575	0.588262	0.579999	0.634073	0.61387	0.679761	0.678144	0.656086
22.625	0.557484	0.574478	0.637187	0.614133	0.654854		22.625	0.590383	0.579397	0.640316	0.612637	0.677108	0.679539	0.659613
22.675	0.557745	0.576203	0.639485	0.615183	0.656031		22.675	0.590824	0.578272	0.641859	0.614855	0.677226	0.675585	0.653139
22.725	0.561369	0.575348	0.637111	0.616871	0.654439		22.725	0.59192	0.580502	0.638559	0.615618	0.679048	0.67843	0.65322
22.775	0.559687	0.576579	0.638071	0.617363	0.657124		22.775	0.589915	0.582543	0.642193	0.616799	0.674785	0.680646	0.650545
22.825	0.566221	0.577806	0.636674	0.617707	0.659468		22.825	0.593292	0.580815	0.640303	0.617877	0.678171	0.681345	0.645179
22.875	0.561204	0.580788	0.643804	0.618559	0.661877		22.875	0.591857	0.578668	0.643265	0.61848	0.679325	0.681002	0.652852
22.925	0.564237	0.580294	0.639563	0.619941	0.659208		22.925	0.59662	0.580959	0.646799	0.617854	0.682019	0.682218	0.658976
22.975	0.563619	0.581267	0.648679	0.620179	0.660208		22.975	0.595814	0.581831	0.644615	0.620524	0.680145	0.67792	0.656137
23.025	0.562514	0.58101	0.645252	0.620632	0.662249		23.025	0.591267	0.586043	0.63937	0.620834	0.68009	0.686638	0.653291
23.075	0.566448	0.582368	0.645599	0.620823	0.660686		23.075	0.60058	0.583441	0.638801	0.621833	0.686247	0.68303	0.661541
23.125	0.567309	0.581655	0.641056	0.622553	0.662752		23.125	0.60153	0.58509	0.650714	0.622806	0.686048	0.683784	0.649527
23.175	0.56531	0.584431	0.644415	0.623192	0.662446		23.175	0.599943	0.584351	0.652586	0.623445	0.680564	0.68368	0.66483
23.225	0.569951	0.585359	0.6463	0.623693	0.664128		23.225	0.599627	0.587295	0.65318	0.624098	0.684281	0.685375	0.648864
23.275	0.570865	0.587379	0.64109	0.624239	0.66523		23.275	0.600329	0.590032	0.640635	0.624558	0.687305	0.690014	0.661891
23.325	0.569363	0.587897	0.644648	0.62535	0.664357		23.325	0.60479	0.588591	0.64859	0.625981	0.685513	0.688387	0.661961
23.375	0.572612	0.587252	0.647265	0.625391	0.664436		23.375	0.603401	0.586747	0.650054	0.625662	0.686179	0.688642	0.657092
23.425	0.572099	0.588862	0.65006	0.627662	0.664832		23.425	0.60121	0.589206	0.648349	0.627685	0.688236	0.690134	0.665425
23.475	0.572387	0.590383	0.648548	0.628001	0.668207		23.475	0.603459	0.591446	0.652415	0.627737	0.685441	0.691843	0.666563
23.525	0.573985	0.58937	0.648982	0.627876	0.667991		23.525	0.607329	0.592693	0.653686	0.628212	0.689374	0.689665	0.664957
23.575	0.57284	0.590537	0.649634	0.629332	0.668644		23.575	0.604038	0.590541	0.64952	0.6302	0.691394	0.690541	0.664119
23.625	0.579494	0.592937	0.649188	0.630272	0.669384		23.625	0.607342	0.592968	0.650604	0.630659	0.689978	0.692339	0.669149
23.675	0.58096	0.590025	0.649067	0.630907	0.66736		23.675	0.610915	0.59336	0.654392	0.631545	0.690153	0.694186	0.663204
23.725	0.577954	0.596554	0.652301	0.632516	0.673662		23.725	0.606345	0.593878	0.65195	0.632054	0.687613	0.69187	0.665375
23.775	0.576716	0.590933	0.655926	0.632157	0.673739		23.775	0.60695	0.596264	0.654354	0.632523	0.689792	0.695194	0.664078
23.825	0.582327	0.595217	0.654432	0.633201	0.673066		23.825	0.612048	0.598713	0.651312	0.633058	0.688361	0.692812	0.6646
23.875	0.579041	0.596711	0.657647	0.63407	0.673639		23.875	0.612246	0.59417	0.652102	0.634946	0.690685	0.696582	0.666102
23.925	0.580699	0.594386	0.659475	0.634511	0.674213		23.925	0.612605	0.598547	0.65961	0.63519	0.691746	0.691869	0.671358
23.975	0.581455	0.595622	0.656936	0.634917	0.674738		23.975	0.612269	0.597972	0.656923	0.636384	0.690749	0.695679	0.675017
24.025	0.583764	0.597069	0.652138	0.635877	0.673313		24.025	0.614725	0.597167	0.65215	0.63607	0.693945	0.694757	0.664313
24.075	0.583557	0.599487	0.652062	0.636602	0.674932		24.075	0.613913	0.598041	0.665562	0.636378	0.691962	0.696996	0.673341
24.125	0.586467	0.600205	0.657351	0.637272	0.677769		24.125	0.605982	0.600634	0.654514	0.63733	0.693941	0.693131	0.676105
24.175	0.584961	0.599794	0.662711	0.638244	0.675072		24.175	0.614571	0.599958	0.664498	0.63785	0.695579	0.697689	0.671983
24.225	0.583815	0.602256	0.659738	0.638904	0.67854		24.225	0.615094	0.603721	0.656528	0.640026	0.699487	0.699453	0.672362
24.275	0.586833	0.602006	0.659059	0.639129	0.678116		24.275	0.611961	0.602629	0.658963	0.640721	0.698601	0.698102	0.672709
24.325	0.586999	0.603104	0.660287	0.639919	0.67947		24.325	0.617372	0.605302	0.659989	0.640865	0.69784	0.698889	0.677673
24.375	0.592352	0.603779	0.662367	0.641243	0.678599		24.375	0.61603	0.607122	0.665193	0.641438	0.697198	0.702044	0.673542
24.425	0.588281	0.604628	0.663892	0.642453	0.680126		24.425	0.62189	0.604544	0.662591	0.641847	0.697866	0.698841	0.675802
24.475	0.590709	0.608282	0.665752	0.642573	0.682882		24.475	0.624865	0.606295	0.660664	0.643212	0.70029	0.699197	0.67057
24.525	0.590641	0.606565	0.664612	0.643883	0.681404		24.525	0.620369	0.607926	0.666442	0.644466	0.698648	0.70564	0.678654
24.575	0.592228	0.608381	0.672683	0.644059	0.683369		24.575	0.623248	0.608852	0.664399	0.645075	0.702356	0.700865	0.672507
24.625	0.594721	0.609887	0.663124	0.644395	0.683484		24.625	0.623073	0.608154	0.665904	0.645213	0.701517	0.704775	0.673037
24.675	0.59263	0.610281	0.66519	0.645767	0.684836		24.675	0.620988	0.610238	0.663185	0.646913	0.702204	0.700754	0.681924
24.725	0.593028	0.612443	0.667719	0.646482	0.685039		24.725	0.626452	0.610287	0.666992	0.646692	0.703739	0.704866	0.681108
24.775	0.595312	0.610423	0.669119	0.646635	0.68608		24.775	0.628387	0.611218	0.67535	0.64783	0.700515	0.703674	0.670476
24.825	0.595939	0.611468	0.665488	0.647951	0.687183		24.825	0.629018	0.612172	0.667102	0.648911	0.701443	0.704548	0.676387
24.875	0.597255	0.613261	0.66911	0.649071	0.686894		24.875	0.626896	0.615128	0.663465	0.649917	0.70487	0.705372	0.678415
24.925	0.598231	0.610136	0.67222	0.650298	0.689291		24.925	0.626388	0.613763	0.668143	0.650155	0.702308	0.708046	0.674628
24.975	0.601117	0.612335	0.667382	0.65031	0.686037		24.975	0.629403	0.612899	0.668751	0.65047	0.704454	0.708141	0.685051
25.025	0.599476	0.615919	0.671624	0.6512	0.688376		25.025	0.632189	0.614917	0.673878	0.651848	0.707365	0.704814	0.676075
25.075	0.602025	0.617612	0.671227	0.652448	0.691483		25.075	0.632094	0.617539	0.67392	0.651889	0.706284	0.706894	0.676119
25.125	0.601099	0.616948	0.674336	0.653015	0.689748		25.125	0.632672	0.61583	0.671665	0.652661	0.709382	0.710446	0.684027
25.175	0.603731	0.614688	0.674555	0.6529	0.690381		25.175	0.63298	0.6186	0.67215	0.653447	0.710388	0.710134	0.678552
25.225	0.603706	0.61818	0.674589	0.654592	0.691681		25.225	0.632051	0.619613	0.674068	0.655271	0.706638	0.711331	0.683183
25.275	0.602579	0.619985	0.681333	0.654589	0.690799		25.275	0.638597	0.6204	0.673292	0.655489	0.70984	0.712054	0.690578
25.325	0.606979	0.622769	0.681627	0.656495	0.693224		25.325	0.63252	0.62129	0.683629	0.656245	0.7109	0.7106	0.680527
25.375	0.604231	0.622523	0.679261	0.656065	0.692964		25.375	0.636485	0.619822	0.677574	0.656226	0.712278	0.712068	0.681486
25.425	0.609577	0.6228	0.678208	0.658064	0.693248		25.425	0.637384	0.624748	0.677629	0.657302	0.711112	0.709794	0.686448
25.475	0.605288	0.624282	0.678081	0.658049	0.69401		25.475	0.636692	0.626356	0.682202	0.658939	0.712242	0.713573	0.687757
25.525	0.607496	0.624294	0.677485	0.659248	0.696084		25.525	0.637257	0.624611	0.682976	0.658182	0.714341	0.715008	0.686409
25.575	0.605519	0.625065	0.682314	0.659719	0.697023		25.575	0.640901	0.625148	0.67637	0.659467	0.713319	0.712922	0.684892
25.625	0.609233	0.625221	0.681943	0.659764	0.695689		25.625	0.639158	0.623766	0.68017	0.659865	0.714965	0.717776	0.692968
25.675	0.611072	0.625465	0.684866	0.6607	0.698651		25.675	0.638518	0.626766	0.678883	0.661741	0.711152	0.713819	0.689629
25.725	0.615494	0.628154	0.679072	0.662386	0.698609		25.725	0.642563	0.62678	0.684435	0.661332	0.717252	0.716689	0.689936
25.775	0.612132	0.627301	0.683821	0.662376	0.69998		25.775	0.643799	0.626105	0.684617	0.663549	0.713011	0.715101	0.692848
25.825	0.612028	0.626902	0.682244	0.663061	0.699923		25.825	0.643255	0.630464	0.686021	0.663044	0.718314	0.716719	0.687439
25.875	0.614779	0.630474	0.685364	0.665053	0.698594		25.875	0.645734	0.630763	0.685775	0.663369	0.716004	0.718896	0.686176
25.925	0.61782	0.629744	0.686408	0.663652	0.700987		25.925	0.646725	0.629544	0.682639	0.665358	0.714958	0.717524	0.695184
25.975	0.617982	0.629442	0.686518	0.666414	0.701116		25.975	0.643317	0.628892	0.692761	0.665627	0.719458	0.71919	0.687407
26.025	0.618346	0.631809	0.690665	0.666201	0.702202		26.025	0.646104	0.634306	0.684862	0.66653	0.718	0.721355	0.691081
26.075	0.61826	0.633386	0.688963	0.666795	0.701783		26.075	0.648616	0.631834	0.688309	0.667217	0.716731	0.721609	0.6908
26.125	0.619004	0.633569	0.687631	0.668008	0.703509		26.125	0.647801	0.633763	0.691973	0.667185	0.717948	0.721049	0.693017
26.175	0.617259	0.633074	0.690228	0.667984	0.702208		26.175	0.65112	0.633987	0.691268	0.668394	0.721032	0.723817	0.691752
26.225	0.617643	0.634157	0.690789	0.669209	0.705188		26.225	0.647314	0.637746	0.69044	0.669344	0.720863	0.723469	0.694123
26.275	0.621666	0.636918	0.687498	0.669661	0.70296		26.275	0.650115	0.636343	0.688377	0.670439	0.720603	0.724005	0.697698
26.325	0.621227	0.636754	0.692627	0.670823	0.70625		26.325	0.650417	0.638226	0.693451	0.670741	0.72221	0.722406	0.694887
26.375	0.623357	0.637716	0.694202	0.671309	0.705828		26.375	0.653199	0.639082	0.696413	0.670725	0.723243	0.723905	0.689821
26.425	0.621068	0.639402	0.693871	0.671288	0.706933		26.425	0.651237	0.641025	0.692457	0.671864	0.724389	0.726608	0.693174
26.475	0.624455	0.642336	0.692974	0.672373	0.706848		26.475	0.652133	0.637813	0.693075	0.672573	0.723117	0.725251	0.693941
26.525	0.626356	0.64041	0.692902	0.673544	0.707161		26.525	0.65358	0.642258	0.699079	0.673303	0.721734	0.726455	0.692851
26.575	0.623888	0.638829	0.69715	0.674252	0.70899		26.575	0.654343	0.642002	0.695192	0.67524	0.722989	0.727485	0.700577
26.625	0.625216	0.641155	0.693788	0.675179	0.70883		26.625	0.65671	0.642848	0.694594	0.675298	0.724424	0.729612	0.702427
26.675	0.625644	0.64402	0.700659	0.675767	0.710638		26.675	0.654795	0.645594	0.694115	0.675809	0.726455	0.725769	0.696267
26.725	0.625742	0.645366	0.700974	0.675465	0.711286		26.725	0.657185	0.643974	0.700964	0.676344	0.728533	0.727892	0.694691
26.775	0.626839	0.645714	0.694392	0.677488	0.711327		26.775	0.656397	0.644542	0.695681	0.677042	0.727503	0.727535	0.694028
26.825	0.631538	0.644117	0.696179	0.67765	0.714381		26.825	0.659147	0.645231	0.700268	0.678212	0.72608	0.727955	0.69566
26.875	0.629536	0.644455	0.69448	0.67801	0.712368		26.875	0.658231	0.647903	0.699765	0.678636	0.730602	0.728836	0.694207
26.925	0.632546	0.644882	0.699991	0.679042	0.713616		26.925	0.6603	0.64519	0.706395	0.679666	0.727942	0.729955	0.698969
26.975	0.632072	0.64574	0.703003	0.680428	0.71153		26.975	0.66437	0.64759	0.701481	0.68002	0.731393	0.731719	0.697331
27.025	0.632537	0.648629	0.702211	0.681327	0.713727		27.025	0.661434	0.647428	0.704868	0.681144	0.731194	0.734517	0.701825
27.075	0.636247	0.650207	0.700399	0.680463	0.713657		27.075	0.66039	0.651454	0.706848	0.681551	0.729839	0.732369	0.699697
27.125	0.634709	0.649414	0.703046	0.681599	0.713761		27.125	0.661328	0.651533	0.706268	0.681889	0.733641	0.732594	0.697522
27.175	0.636529	0.653794	0.707408	0.681929	0.715782		27.175	0.664236	0.653591	0.705908	0.683755	0.731089	0.731762	0.706232
27.225	0.637823	0.652177	0.699128	0.683182	0.716883		27.225	0.661853	0.649526	0.703507	0.683343	0.735584	0.730364	0.701109
27.275	0.635942	0.649438	0.701187	0.683673	0.716375		27.275	0.666463	0.652	0.703055	0.684911	0.733952	0.738159	0.705578
27.325	0.639596	0.655211	0.706561	0.684666	0.717326		27.325	0.669005	0.652617	0.702677	0.685065	0.732028	0.735547	0.710709
27.375	0.639226	0.65512	0.704726	0.684289	0.715862		27.375	0.667322	0.653335	0.710893	0.685846	0.734622	0.73771	0.707023
27.425	0.63873	0.653625	0.709101	0.68592	0.720588		27.425	0.666987	0.65331	0.70957	0.685996	0.736111	0.737503	0.701408
27.475	0.637136	0.654268	0.707569	0.687025	0.720906		27.475	0.667206	0.654185	0.710784	0.687307	0.736556	0.737636	0.708261
27.525	0.642944	0.654793	0.706733	0.687527	0.719461		27.525	0.668765	0.65569	0.710402	0.68763	0.736583	0.737701	0.702598
27.575	0.641679	0.658559	0.708023	0.688607	0.718466		27.575	0.668823	0.65899	0.709758	0.688536	0.737934	0.738955	0.705379
27.625	0.642526	0.660038	0.704954	0.689346	0.720285		27.625	0.668343	0.658317	0.709133	0.688604	0.739707	0.736586	0.701404
27.675	0.645882	0.657862	0.710636	0.689843	0.720789		27.675	0.672279	0.659957	0.7107	0.689546	0.73994	0.74126	0.705633
27.725	0.644845	0.66005	0.708139	0.689934	0.722117		27.725	0.672437	0.661462	0.709929	0.691359	0.736235	0.740898	0.704963
27.775	0.645166	0.660073	0.709863	0.69064	0.722547		27.775	0.671654	0.662527	0.715131	0.690322	0.738716	0.741869	0.710348
27.825	0.650535	0.66187	0.710303	0.691284	0.723548		27.825	0.670503	0.663028	0.710276	0.691679	0.73891	0.742435	0.710404
27.875	0.645631	0.662569	0.70922	0.692113	0.724112		27.875	0.674871	0.662694	0.715567	0.692317	0.741191	0.744838	0.717265
27.925	0.64662	0.662562	0.714237	0.693034	0.723915		27.925	0.675817	0.665037	0.712084	0.693417	0.740287	0.740157	0.714427
27.975	0.648452	0.662007	0.710433	0.695075	0.724547		27.975	0.674944	0.663985	0.716258	0.693943	0.741296	0.741607	0.713066
28.025	0.648135	0.665935	0.708727	0.694578	0.725657		28.025	0.676968	0.665526	0.714081	0.694924	0.741227	0.743225	0.708835
28.075	0.650543	0.666623	0.71265	0.695571	0.724836		28.075	0.675756	0.665992	0.713402	0.695161	0.742896	0.740429	0.708568
28.125	0.653506	0.667507	0.712197	0.695722	0.729734		28.125	0.675058	0.667897	0.712875	0.695801	0.741717	0.742876	0.711028
28.175	0.652771	0.667134	0.716631	0.697038	0.726859		28.175	0.679729	0.667736	0.71616	0.696983	0.743964	0.746738	0.708774
28.225	0.65457	0.668296	0.7173	0.697161	0.729161		28.225	0.677348	0.667699	0.711809	0.697404	0.747846	0.741108	0.71165
28.275	0.654552	0.668512	0.718146	0.69865	0.72879		28.275	0.679322	0.670326	0.717025	0.698634	0.742831	0.746778	0.718208
28.325	0.654741	0.668575	0.713282	0.699334	0.731344		28.325	0.681564	0.669482	0.716774	0.699764	0.744133	0.747169	0.713089
28.375	0.6559	0.67159	0.717107	0.699796	0.730426		28.375	0.68271	0.669926	0.721059	0.700233	0.746505	0.747171	0.716888
28.425	0.654258	0.67164	0.718848	0.700786	0.729188		28.425	0.683893	0.67229	0.717555	0.69909	0.746438	0.748904	0.716586
28.475	0.656418	0.671438	0.721277	0.700686	0.731548		28.475	0.681359	0.671101	0.721947	0.700511	0.74724	0.747627	0.715394
28.525	0.659738	0.67228	0.72189	0.701131	0.73205		28.525	0.685489	0.672011	0.717649	0.702078	0.749483	0.747561	0.720398
28.575	0.659971	0.672466	0.721362	0.70134	0.732802		28.575	0.685744	0.673067	0.719599	0.702469	0.747968	0.746865	0.71164
28.625	0.660722	0.674446	0.724019	0.702713	0.733582		28.625	0.683045	0.673582	0.717871	0.702898	0.749191	0.749532	0.715821
28.675	0.66235	0.672447	0.722638	0.703413	0.731717		28.675	0.686103	0.675396	0.717429	0.703004	0.748691	0.75222	0.721531
28.725	0.659185	0.674684	0.72174	0.703875	0.733539		28.725	0.686482	0.677094	0.719893	0.704729	0.749333	0.752579	0.718422
28.775	0.660248	0.676565	0.71891	0.704319	0.73432		28.775	0.690005	0.674722	0.730764	0.704862	0.750931	0.750082	0.713712
28.825	0.663757	0.676697	0.721692	0.705976	0.733444		28.825	0.689598	0.675636	0.722202	0.706998	0.749384	0.750213	0.719187
28.875	0.666792	0.67691	0.722089	0.705802	0.737358		28.875	0.691473	0.678337	0.718247	0.706497	0.751805	0.752079	0.720473
28.925	0.66645	0.678731	0.71919	0.706799	0.735263		28.925	0.687605	0.679798	0.720708	0.706693	0.751954	0.754905	0.720244
28.975	0.661261	0.67645	0.724501	0.707466	0.738023		28.975	0.692826	0.6793	0.725072	0.708326	0.752097	0.753149	0.723257
29.025	0.663954	0.678717	0.72591	0.708361	0.735744		29.025	0.693356	0.677657	0.721194	0.707527	0.752801	0.754232	0.720834
29.075	0.67017	0.679977	0.723866	0.709711	0.737178		29.075	0.692175	0.680611	0.720319	0.708266	0.754745	0.752819	0.724868
29.125	0.66537	0.680826	0.724261	0.710029	0.738649		29.125	0.690827	0.680925	0.720884	0.709676	0.754292	0.753596	0.724527
29.175	0.670795	0.683126	0.727484	0.710046	0.739325		29.175	0.693127	0.680917	0.730907	0.709913	0.755903	0.757899	0.718912
29.225	0.670809	0.680399	0.728863	0.711192	0.739808		29.225	0.692783	0.682519	0.728887	0.710002	0.751587	0.756947	0.718338
29.275	0.670161	0.685013	0.727898	0.711774	0.740727		29.275	0.695358	0.684012	0.723444	0.71143	0.754733	0.759547	0.72514
29.325	0.671799	0.683681	0.723982	0.711826	0.740191		29.325	0.69575	0.684592	0.732154	0.712336	0.754117	0.755473	0.720257
29.375	0.672774	0.684586	0.722035	0.712895	0.742099		29.375	0.696954	0.684335	0.730702	0.713293	0.756004	0.759942	0.72515
29.425	0.674466	0.685203	0.724701	0.713736	0.742228		29.425	0.69767	0.684498	0.729982	0.71432	0.757426	0.759636	0.722737
29.475	0.672321	0.683073	0.730723	0.714261	0.742856		29.475	0.699022	0.684484	0.728815	0.714264	0.754917	0.757048	0.725339
29.525	0.67242	0.683889	0.733058	0.714766	0.743099		29.525	0.697896	0.686175	0.731083	0.715101	0.75911	0.760107	0.734896
29.575	0.676381	0.68521	0.734018	0.716025	0.742564		29.575	0.699475	0.688367	0.729081	0.715312	0.754412	0.759543	0.726121
29.625	0.675418	0.68775	0.733946	0.716821	0.744687		29.625	0.704025	0.688969	0.733496	0.715835	0.758261	0.757177	0.724122
29.675	0.673978	0.68677	0.730538	0.716961	0.744719		29.675	0.702012	0.689209	0.734872	0.717444	0.759474	0.760932	0.728446
29.725	0.673096	0.687	0.732466	0.717114	0.744982		29.725	0.702208	0.690219	0.732554	0.717813	0.761099	0.759374	0.724433
29.775	0.679099	0.687134	0.731298	0.718809	0.74717		29.775	0.70308	0.690508	0.729849	0.718171	0.758058	0.761187	0.73246
29.825	0.678669	0.69006	0.731703	0.719071	0.746362		29.825	0.706064	0.691446	0.735431	0.719117	0.758866	0.7609	0.728832
29.875	0.68177	0.690593	0.732885	0.719418	0.746622		29.875	0.702384	0.689569	0.737051	0.719659	0.762051	0.762731	0.731122
29.925	0.680192	0.690435	0.734369	0.720305	0.748384		29.925	0.704622	0.693422	0.731131	0.719948	0.761568	0.763084	0.728996
29.975	0.681679	0.69287	0.737709	0.721341	0.747136		29.975	0.703723	0.691253	0.735165	0.721346	0.761932	0.765557	0.73255
30.025	0.682781	0.692117	0.736937	0.721885	0.748841		30.025	0.710388	0.693687	0.735364	0.721699	0.762095	0.765166	0.729188
30.075	0.682047	0.693733	0.735698	0.722386	0.747756		30.075	0.706281	0.695804	0.734223	0.721596	0.762228	0.765579	0.732429
30.125	0.685864	0.693783	0.736772	0.722748	0.74892		30.125	0.708199	0.693257	0.735038	0.722716	0.762091	0.765301	0.730295
30.175	0.682276	0.693777	0.735758	0.722788	0.750055		30.175	0.707333	0.693637	0.735549	0.72286	0.762572	0.762888	0.739609
30.225	0.68586	0.695564	0.738114	0.72358	0.751394		30.225	0.708062	0.696546	0.740679	0.724088	0.76352	0.765445	0.736361
30.275	0.685685	0.699311	0.741544	0.724796	0.753163		30.275	0.710925	0.698752	0.74196	0.72507	0.763267	0.764871	0.727834
30.325	0.68896	0.697578	0.740367	0.725692	0.752034		30.325	0.715093	0.698301	0.737981	0.72508	0.767086	0.766316	0.731083
30.375	0.692501	0.697239	0.741663	0.72651	0.752505		30.375	0.709358	0.698239	0.741931	0.725578	0.76597	0.76947	0.732762
30.425	0.690684	0.697095	0.739838	0.72621	0.75382		30.425	0.712012	0.699595	0.741972	0.726175	0.766558	0.764589	0.735234
30.475	0.692213	0.699504	0.748428	0.727687	0.752924		30.475	0.712829	0.700179	0.745017	0.726719	0.769728	0.767904	0.731304
30.525	0.688645	0.701597	0.741791	0.728473	0.753683		30.525	0.714555	0.702953	0.743411	0.7281	0.76669	0.771231	0.740314
30.575	0.693751	0.701306	0.745178	0.728793	0.755452		30.575	0.714311	0.700934	0.739978	0.728778	0.768161	0.770205	0.734785
30.625	0.693418	0.700886	0.747344	0.730076	0.754981		30.625	0.713898	0.701434	0.744492	0.729935	0.769272	0.770779	0.735156
30.675	0.694554	0.701879	0.747826	0.730301	0.757823		30.675	0.714671	0.702296	0.748216	0.72957	0.769583	0.770437	0.7393
30.725	0.69368	0.702756	0.748623	0.730453	0.757476		30.725	0.717267	0.703067	0.742636	0.730123	0.773819	0.77262	0.738854
30.775	0.691483	0.703106	0.74354	0.731997	0.756677		30.775	0.716679	0.704183	0.747012	0.730475	0.772757	0.773267	0.738377
30.825	0.693286	0.705033	0.74791	0.732196	0.756827		30.825	0.721722	0.704853	0.74511	0.732096	0.774108	0.77194	0.741954
30.875	0.696801	0.70604	0.747014	0.732838	0.757329		30.875	0.717965	0.70891	0.743883	0.732915	0.772304	0.773009	0.73825
30.925	0.700043	0.706118	0.746762	0.733159	0.759125		30.925	0.720131	0.705591	0.742985	0.732443	0.771636	0.773117	0.737577
30.975	0.69626	0.706134	0.746118	0.733366	0.756502		30.975	0.722696	0.708415	0.748258	0.733402	0.773842	0.771147	0.74339
31.025	0.699843	0.70864	0.747476	0.734162	0.761124		31.025	0.719053	0.708376	0.746618	0.734817	0.773261	0.775325	0.737301
31.075	0.699463	0.708812	0.74641	0.735274	0.76094		31.075	0.723421	0.708443	0.750158	0.735204	0.775366	0.771578	0.74649
31.125	0.696757	0.709739	0.754086	0.736664	0.75993		31.125	0.71908	0.710989	0.751034	0.735937	0.773224	0.77214	0.741093
31.175	0.702645	0.707104	0.747596	0.736989	0.761489		31.175	0.724882	0.710321	0.751633	0.736164	0.772108	0.775107	0.739313
31.225	0.703098	0.710413	0.74697	0.737591	0.761927		31.225	0.725747	0.709941	0.755596	0.73644	0.775724	0.776448	0.743402
31.275	0.704122	0.709983	0.749777	0.737606	0.762813		31.275	0.727002	0.709765	0.751624	0.737912	0.774891	0.777892	0.743076
31.325	0.706569	0.711869	0.752563	0.738745	0.763075		31.325	0.727534	0.71315	0.750779	0.737966	0.776046	0.777737	0.746329
31.375	0.704075	0.71248	0.75117	0.738958	0.764785		31.375	0.723665	0.711977	0.75284	0.738648	0.776086	0.779225	0.741601
31.425	0.70398	0.711597	0.752118	0.739519	0.76393		31.425	0.726655	0.714319	0.756969	0.739247	0.778883	0.777585	0.747059
31.475	0.703507	0.715582	0.754082	0.740627	0.76405		31.475	0.725382	0.714131	0.75191	0.739677	0.777886	0.780686	0.744517
31.525	0.704926	0.716068	0.755703	0.740418	0.765831		31.525	0.730118	0.714812	0.755724	0.740751	0.781151	0.780103	0.746118
31.575	0.710362	0.717326	0.755746	0.742368	0.763867		31.575	0.730667	0.717256	0.750976	0.740764	0.782124	0.777377	0.748683
31.625	0.709096	0.716027	0.748864	0.742844	0.765756		31.625	0.727153	0.716134	0.759298	0.742371	0.782052	0.781437	0.741041
31.675	0.70685	0.716051	0.756158	0.742654	0.766928		31.675	0.728572	0.71875	0.753872	0.742794	0.778924	0.782552	0.750799
31.725	0.709222	0.720006	0.755662	0.743243	0.768032		31.725	0.727559	0.71613	0.752283	0.74348	0.779022	0.781619	0.74985
31.775	0.711535	0.719723	0.756409	0.744508	0.768929		31.775	0.73412	0.717362	0.761832	0.743938	0.779712	0.78145	0.750106
31.825	0.709863	0.719503	0.754954	0.745486	0.76789		31.825	0.731613	0.719103	0.758479	0.744465	0.781349	0.784138	0.753812
31.875	0.714911	0.720746	0.760685	0.745261	0.769059		31.875	0.734026	0.720334	0.759303	0.745257	0.784699	0.781883	0.748546
31.925	0.713282	0.719525	0.759342	0.74644	0.769642		31.925	0.734818	0.722265	0.761461	0.745958	0.784835	0.784243	0.743281
31.975	0.711711	0.721668	0.763367	0.746668	0.768334		31.975	0.736891	0.723235	0.761138	0.746438	0.782372	0.782427	0.754126
32.025	0.712719	0.72264	0.759389	0.747202	0.769826		32.025	0.736569	0.722291	0.75919	0.746438	0.782848	0.784273	0.75297
32.075	0.714925	0.723156	0.761193	0.748792	0.770446		32.075	0.736046	0.719775	0.762023	0.747823	0.785616	0.787338	0.744534
32.125	0.716133	0.725145	0.765581	0.748031	0.771552		32.125	0.738156	0.725154	0.760255	0.748822	0.786886	0.784053	0.756631
32.175	0.714582	0.724128	0.760061	0.748969	0.772105		32.175	0.736366	0.724577	0.763871	0.748686	0.784938	0.786064	0.745475
32.225	0.716389	0.726497	0.762521	0.750116	0.772794		32.225	0.734385	0.724473	0.76721	0.749589	0.784733	0.78339	0.758859
32.275	0.719011	0.725501	0.764767	0.750894	0.773415		32.275	0.73856	0.726684	0.765241	0.750277	0.783542	0.785671	0.758379
32.325	0.719044	0.727507	0.762403	0.751351	0.772964		32.325	0.738785	0.727706	0.763888	0.750669	0.785163	0.787467	0.755103
32.375	0.720043	0.727097	0.765287	0.751339	0.772292		32.375	0.740936	0.72842	0.764196	0.751362	0.784662	0.788206	0.755344
32.425	0.72075	0.726347	0.764895	0.752635	0.774904		32.425	0.741648	0.729085	0.762492	0.7518	0.789422	0.78863	0.759714
32.475	0.717765	0.726401	0.757898	0.752505	0.774999		32.475	0.741277	0.729285	0.76594	0.75292	0.788757	0.788695	0.759905
32.525	0.721469	0.728957	0.765541	0.752884	0.776507		32.525	0.740864	0.731172	0.767062	0.752832	0.791565	0.790253	0.757878
32.575	0.720719	0.729645	0.767508	0.754263	0.77616		32.575	0.745081	0.732724	0.769091	0.753826	0.788576	0.789531	0.761564
32.625	0.723355	0.730249	0.766278	0.754816	0.777456		32.625	0.742102	0.734353	0.765264	0.755143	0.789292	0.791915	0.764375
32.675	0.725655	0.733019	0.768633	0.755909	0.779416		32.675	0.742182	0.732945	0.772077	0.755307	0.791619	0.7917	0.761522
32.725	0.726746	0.733099	0.768599	0.756294	0.778007		32.725	0.745469	0.733262	0.766089	0.755984	0.78928	0.793465	0.753939
32.775	0.724272	0.733757	0.764778	0.756084	0.779056		32.775	0.747621	0.732451	0.769008	0.756246	0.792541	0.793721	0.761888
32.825	0.72735	0.731472	0.765429	0.756958	0.778524		32.825	0.747078	0.73543	0.767341	0.757389	0.790558	0.79377	0.761729
32.875	0.726797	0.731216	0.772954	0.757449	0.779706		32.875	0.747463	0.737451	0.770473	0.757647	0.791281	0.792751	0.761268
32.925	0.722335	0.735007	0.766632	0.758597	0.781034		32.925	0.747382	0.734021	0.767693	0.758816	0.794061	0.79405	0.765232
32.975	0.727682	0.73351	0.772374	0.75826	0.779754		32.975	0.748554	0.736098	0.770103	0.758822	0.79568	0.79309	0.762303
33.025	0.730018	0.73483	0.770898	0.759989	0.778958		33.025	0.750489	0.737523	0.77104	0.759847	0.791614	0.795221	0.763607
33.075	0.731467	0.738651	0.774167	0.760286	0.781134		33.075	0.746216	0.739284	0.771671	0.760563	0.794431	0.798157	0.768111
33.125	0.732652	0.737351	0.769954	0.761394	0.780628		33.125	0.749951	0.738698	0.775407	0.761966	0.794998	0.795178	0.763067
33.175	0.731129	0.738795	0.773552	0.761678	0.782291		33.175	0.746905	0.74133	0.768879	0.761356	0.796735	0.795883	0.770578
33.225	0.730869	0.739195	0.776499	0.761508	0.785467		33.225	0.752705	0.736878	0.772415	0.762019	0.795691	0.796041	0.76339
33.275	0.732756	0.739789	0.769719	0.763307	0.784047		33.275	0.753518	0.738685	0.774174	0.762814	0.796636	0.795672	0.761862
33.325	0.732127	0.741472	0.77196	0.763482	0.784647		33.325	0.750231	0.742835	0.775766	0.763406	0.795856	0.795896	0.767214
33.375	0.733152	0.741197	0.776934	0.76449	0.785787		33.375	0.751622	0.743404	0.775306	0.763638	0.798533	0.797935	0.76289
33.425	0.729693	0.742256	0.775325	0.764885	0.785836		33.425	0.751815	0.741974	0.77194	0.764594	0.800306	0.797575	0.765144
33.475	0.734106	0.742255	0.775164	0.765618	0.78599		33.475	0.754979	0.742485	0.779061	0.765181	0.799244	0.798305	0.766172
33.525	0.73596	0.742463	0.77382	0.765907	0.784514		33.525	0.756064	0.744193	0.773946	0.766161	0.798138	0.798392	0.771535
33.575	0.735047	0.7449	0.77516	0.766773	0.78589		33.575	0.754408	0.748191	0.778665	0.766328	0.798584	0.797888	0.778728
33.625	0.736944	0.744455	0.778935	0.767213	0.786753		33.625	0.759655	0.746955	0.778885	0.767206	0.799067	0.800864	0.767776
33.675	0.738868	0.745964	0.777749	0.767329	0.787181		33.675	0.753987	0.746529	0.778359	0.767574	0.798988	0.80184	0.770289
33.725	0.739896	0.746748	0.777393	0.768111	0.787609		33.725	0.756571	0.744641	0.780234	0.76826	0.800672	0.801717	0.770922
33.775	0.744156	0.747965	0.778928	0.768554	0.789239		33.775	0.75863	0.748224	0.780016	0.76924	0.802641	0.802148	0.764745
33.825	0.741539	0.748894	0.778057	0.76926	0.78833		33.825	0.757735	0.747945	0.783509	0.769017	0.801723	0.803353	0.773056
33.875	0.739995	0.747994	0.779488	0.76953	0.788212		33.875	0.759586	0.748365	0.783651	0.769241	0.803266	0.803735	0.772842
33.925	0.743819	0.748116	0.776726	0.770004	0.789289		33.925	0.759584	0.748911	0.782967	0.770362	0.802118	0.804904	0.76864
33.975	0.74289	0.748196	0.783152	0.770892	0.791992		33.975	0.758503	0.748158	0.78355	0.771002	0.801637	0.80383	0.771416
34.025	0.743715	0.749119	0.781334	0.77168	0.791052		34.025	0.76214	0.753391	0.783863	0.771316	0.805258	0.806718	0.777927
34.075	0.742308	0.749209	0.779182	0.772864	0.790348		34.075	0.76262	0.752227	0.784974	0.772076	0.801346	0.803507	0.780398
34.125	0.740995	0.752447	0.782554	0.772708	0.792038		34.125	0.760072	0.753264	0.78465	0.772862	0.804222	0.805829	0.77535
34.175	0.748917	0.752063	0.78261	0.773684	0.793054		34.175	0.763325	0.754372	0.788947	0.773264	0.805362	0.804094	0.779825
34.225	0.745759	0.753563	0.786993	0.773433	0.792393		34.225	0.763265	0.752218	0.781566	0.774136	0.804736	0.806702	0.775343
34.275	0.74885	0.754066	0.787047	0.774852	0.792727		34.275	0.761211	0.753006	0.784104	0.774703	0.804302	0.807257	0.774524
34.325	0.746482	0.754965	0.787169	0.775033	0.794484		34.325	0.764313	0.753712	0.789002	0.775156	0.806943	0.809923	0.778617
34.375	0.750769	0.754988	0.788201	0.776722	0.795698		34.375	0.764272	0.754795	0.788434	0.776886	0.805312	0.807096	0.779423
34.425	0.751483	0.754883	0.785907	0.776867	0.796162		34.425	0.768749	0.755387	0.780929	0.776448	0.808773	0.810293	0.776768
34.475	0.750413	0.755641	0.783878	0.776649	0.794818		34.475	0.766161	0.758613	0.79064	0.776295	0.808391	0.807445	0.775715
34.525	0.7513	0.758377	0.78364	0.778123	0.795004		34.525	0.769423	0.755256	0.787393	0.778071	0.809908	0.807284	0.779638
34.575	0.751844	0.757224	0.786244	0.77855	0.798774		34.575	0.767752	0.759302	0.788086	0.778329	0.8124	0.808504	0.776157
34.625	0.752907	0.759103	0.786306	0.77838	0.799051		34.625	0.770023	0.759836	0.78979	0.778766	0.809222	0.808287	0.778967
34.675	0.753984	0.760214	0.7859	0.779149	0.799174		34.675	0.768652	0.759367	0.790865	0.779755	0.810465	0.810636	0.777637
34.725	0.752197	0.759461	0.787073	0.780084	0.798568		34.725	0.769165	0.760601	0.793609	0.779541	0.811372	0.810209	0.783837
34.775	0.7548	0.76195	0.789736	0.781075	0.799812		34.775	0.770322	0.759781	0.790617	0.78064	0.809962	0.808872	0.780278
34.825	0.75156	0.763571	0.791798	0.781651	0.800039		34.825	0.770187	0.764078	0.792817	0.781411	0.810105	0.810715	0.783601
34.875	0.757826	0.762121	0.791096	0.781986	0.800287		34.875	0.777451	0.763277	0.793654	0.781899	0.810974	0.809489	0.779407
34.925	0.75705	0.762151	0.789295	0.782511	0.803175		34.925	0.769775	0.764664	0.788428	0.78259	0.810288	0.813696	0.780485
34.975	0.75794	0.765267	0.791989	0.783559	0.803133		34.975	0.775612	0.765897	0.791262	0.783741	0.811413	0.811567	0.781151
35.025	0.761491	0.765859	0.793848	0.783555	0.801133		35.025	0.773941	0.767353	0.792674	0.784456	0.811709	0.811131	0.781913
35.075	0.760927	0.764263	0.797878	0.784347	0.800771		35.075	0.771962	0.765535	0.792406	0.783931	0.81426	0.811477	0.781658
35.125	0.763807	0.766581	0.794824	0.784521	0.801491		35.125	0.774789	0.766838	0.799028	0.784913	0.811573	0.815306	0.785954
35.175	0.761013	0.767742	0.795167	0.785354	0.803893		35.175	0.776925	0.769004	0.796877	0.785704	0.812725	0.815802	0.787177
35.225	0.76293	0.766672	0.795601	0.78582	0.804113		35.225	0.775534	0.768189	0.798609	0.786078	0.81402	0.816215	0.78665
35.275	0.764828	0.76808	0.795762	0.787251	0.805741		35.275	0.778949	0.76897	0.798683	0.786381	0.814704	0.816974	0.78069
35.325	0.762774	0.768122	0.795784	0.787666	0.803806		35.325	0.77838	0.770514	0.796915	0.787692	0.815197	0.813948	0.785131
35.375	0.762582	0.769995	0.797934	0.787401	0.804516		35.375	0.779017	0.773001	0.798115	0.787813	0.815555	0.817301	0.782575
35.425	0.764145	0.769335	0.795537	0.78841	0.804965		35.425	0.77876	0.771281	0.798298	0.788647	0.816208	0.817724	0.785034
35.475	0.766283	0.773066	0.796341	0.788841	0.806817		35.475	0.777264	0.769414	0.801521	0.789193	0.816683	0.819134	0.791614
35.525	0.763028	0.770377	0.796426	0.790003	0.805674		35.525	0.778298	0.774554	0.797947	0.789485	0.815555	0.818324	0.785709
35.575	0.76523	0.773071	0.799374	0.790262	0.806773		35.575	0.781025	0.773963	0.798833	0.789891	0.818886	0.816663	0.791229
35.625	0.767728	0.773845	0.802452	0.79049	0.80815		35.625	0.784225	0.771712	0.800251	0.791202	0.8168	0.817196	0.795181
35.675	0.769033	0.773076	0.799794	0.79139	0.808049		35.675	0.781208	0.77377	0.800571	0.790677	0.818562	0.817513	0.791889
35.725	0.767084	0.7752	0.802494	0.791772	0.807654		35.725	0.782826	0.774144	0.802544	0.792056	0.820713	0.818809	0.789209
35.775	0.770918	0.775372	0.805484	0.793022	0.808309		35.775	0.78378	0.774928	0.801294	0.791757	0.819324	0.819968	0.790544
35.825	0.768155	0.774048	0.801198	0.793017	0.809938		35.825	0.784632	0.775652	0.801583	0.793202	0.819715	0.819796	0.795926
35.875	0.772445	0.775845	0.799399	0.793995	0.810595		35.875	0.782885	0.77598	0.806181	0.793503	0.822346	0.820307	0.794081
35.925	0.771546	0.776529	0.804808	0.794034	0.811677		35.925	0.786321	0.776844	0.802107	0.794321	0.819669	0.820653	0.796148
35.975	0.772714	0.779126	0.801869	0.794443	0.812879		35.975	0.7841	0.78039	0.804306	0.794271	0.821761	0.821287	0.79205
36.025	0.772644	0.77914	0.808262	0.795154	0.811932		36.025	0.790822	0.779264	0.803439	0.79558	0.821064	0.821412	0.79218
36.075	0.774324	0.778435	0.805258	0.79578	0.811415		36.075	0.788285	0.778638	0.805838	0.795931	0.820887	0.822474	0.791048
36.125	0.77495	0.778086	0.807962	0.796807	0.813554		36.125	0.787794	0.78051	0.805512	0.796146	0.82159	0.822438	0.793715
36.175	0.778766	0.779094	0.806258	0.79693	0.811817		36.175	0.788859	0.780209	0.80731	0.796994	0.823146	0.823841	0.800311
36.225	0.771362	0.779823	0.810642	0.796635	0.811978		36.225	0.788628	0.781341	0.805932	0.797937	0.822534	0.82448	0.798705
36.275	0.774049	0.780066	0.807251	0.798255	0.814133		36.275	0.792209	0.783253	0.807412	0.797729	0.823835	0.825004	0.799658
36.325	0.779038	0.781393	0.80442	0.798641	0.815873		36.325	0.790516	0.78141	0.805495	0.798741	0.823128	0.822725	0.79918
36.375	0.777975	0.781937	0.805858	0.799344	0.814561		36.375	0.796718	0.784448	0.809703	0.798792	0.823852	0.823181	0.795534
36.425	0.779408	0.783248	0.808657	0.800631	0.81748		36.425	0.792985	0.782865	0.808534	0.800483	0.823354	0.823917	0.799988
36.475	0.777431	0.784257	0.808695	0.800278	0.816362		36.475	0.791425	0.787016	0.812132	0.800508	0.82501	0.825977	0.79733
36.525	0.781203	0.785304	0.808704	0.800995	0.817873		36.525	0.795017	0.785613	0.808239	0.801471	0.826046	0.8274	0.795508
36.575	0.781759	0.784528	0.810777	0.801879	0.817639		36.575	0.795078	0.786457	0.807206	0.802398	0.827781	0.827988	0.798409
36.625	0.782982	0.785657	0.809754	0.802007	0.818618		36.625	0.793747	0.787518	0.807166	0.802067	0.826187	0.825434	0.803458
36.675	0.782048	0.786102	0.814724	0.802982	0.817311		36.675	0.792724	0.787091	0.807757	0.802491	0.824509	0.828976	0.796977
36.725	0.781214	0.785651	0.809247	0.80323	0.819626		36.725	0.795735	0.787642	0.808965	0.803358	0.829648	0.826371	0.804947
36.775	0.786492	0.786703	0.811869	0.80401	0.817461		36.775	0.79696	0.790409	0.809902	0.804044	0.827358	0.826955	0.803626
36.825	0.781961	0.790302	0.813376	0.804622	0.819279		36.825	0.793313	0.790482	0.810717	0.804527	0.830699	0.830021	0.799895
36.875	0.785204	0.787944	0.806963	0.804737	0.821177		36.875	0.795842	0.790891	0.813605	0.805225	0.828647	0.82597	0.803362
36.925	0.786643	0.790491	0.812769	0.804998	0.819865		36.925	0.796906	0.789956	0.811113	0.805327	0.828036	0.829232	0.805048
36.975	0.787207	0.7914	0.811455	0.806094	0.821631		36.975	0.799987	0.792377	0.812766	0.805466	0.829891	0.830075	0.804173
37.025	0.7886	0.792208	0.810696	0.806825	0.822664		37.025	0.801237	0.791635	0.813856	0.807297	0.831674	0.829624	0.803279
37.075	0.78543	0.793756	0.813967	0.807133	0.822088		37.075	0.800086	0.793132	0.812469	0.806964	0.831059	0.832601	0.811206
37.125	0.786961	0.792777	0.813056	0.807745	0.822814		37.125	0.800255	0.792757	0.812923	0.808039	0.830429	0.830235	0.803012
37.175	0.788828	0.794647	0.81351	0.808207	0.821865		37.175	0.803804	0.792816	0.814118	0.808882	0.832637	0.832147	0.811218
37.225	0.790567	0.793904	0.818445	0.808773	0.824007		37.225	0.803989	0.792475	0.814891	0.808701	0.832514	0.833247	0.810099
37.275	0.789788	0.79523	0.815469	0.809234	0.823284		37.275	0.802785	0.797361	0.81981	0.810219	0.834509	0.830359	0.809573
37.325	0.791998	0.795401	0.811644	0.809537	0.824693		37.325	0.802911	0.795138	0.814703	0.80943	0.833662	0.833494	0.808793
37.375	0.792777	0.794421	0.81895	0.810526	0.825586		37.375	0.803448	0.796572	0.817536	0.810144	0.833147	0.831613	0.809974
37.425	0.79329	0.795997	0.816924	0.811481	0.823507		37.425	0.805485	0.796684	0.818572	0.811511	0.830398	0.834305	0.810532
37.475	0.7931	0.795074	0.818253	0.811324	0.825078		37.475	0.80686	0.799974	0.818167	0.811628	0.834026	0.833463	0.807225
37.525	0.790901	0.796279	0.817371	0.811768	0.826436		37.525	0.80947	0.798473	0.819907	0.811871	0.834126	0.832873	0.81224
37.575	0.793429	0.797335	0.816077	0.813226	0.827408		37.575	0.805841	0.799634	0.818466	0.813302	0.836105	0.833744	0.811519
37.625	0.79383	0.801981	0.81526	0.813178	0.828579		37.625	0.805324	0.80012	0.819572	0.814066	0.836783	0.837491	0.812773
37.675	0.797487	0.800303	0.820296	0.813947	0.827624		37.675	0.805156	0.799618	0.818372	0.813979	0.834719	0.835693	0.817119
37.725	0.796743	0.804036	0.822674	0.814402	0.828657		37.725	0.809251	0.801809	0.820438	0.815164	0.835976	0.835623	0.811048
37.775	0.798624	0.802083	0.823005	0.814667	0.829938		37.775	0.807468	0.801053	0.819726	0.815268	0.836688	0.83824	0.812502
37.825	0.796935	0.80502	0.818557	0.815936	0.828788		37.825	0.807781	0.80303	0.821141	0.815687	0.835732	0.83903	0.804881
37.875	0.801853	0.800948	0.82314	0.81621	0.828293		37.875	0.808773	0.802597	0.823072	0.81566	0.834904	0.836126	0.815871
37.925	0.799727	0.802783	0.821477	0.816655	0.830168		37.925	0.811853	0.802706	0.821197	0.816982	0.837144	0.838544	0.811474
37.975	0.800486	0.804869	0.818968	0.816555	0.830054		37.975	0.811472	0.806277	0.82273	0.817237	0.837212	0.838208	0.812901
38.025	0.802166	0.805119	0.822364	0.818266	0.831774		38.025	0.810736	0.80451	0.82149	0.817475	0.838566	0.839274	0.816776
38.075	0.800868	0.805217	0.82094	0.817573	0.831532		38.075	0.813089	0.805899	0.821938	0.817649	0.837963	0.838598	0.816852
38.125	0.802212	0.806433	0.824647	0.818937	0.833394		38.125	0.813684	0.805637	0.825609	0.818373	0.840553	0.839584	0.816779
38.175	0.80437	0.807486	0.822678	0.819319	0.832327		38.175	0.812202	0.80801	0.824546	0.819254	0.841293	0.838666	0.815154
38.225	0.802531	0.806648	0.823226	0.819265	0.833946		38.225	0.814157	0.807348	0.825858	0.819935	0.839659	0.840098	0.822487
38.275	0.805945	0.807042	0.824728	0.820841	0.834423		38.275	0.814863	0.807241	0.827405	0.819935	0.839991	0.840476	0.823085
38.325	0.804263	0.806861	0.826204	0.821051	0.833958		38.325	0.813449	0.811345	0.828553	0.821451	0.841153	0.843451	0.82582
38.375	0.803351	0.810142	0.824795	0.821769	0.835645		38.375	0.815372	0.810407	0.824455	0.821534	0.840454	0.841816	0.817718
38.425	0.809866	0.809657	0.827605	0.821596	0.832907		38.425	0.81451	0.811377	0.830611	0.822495	0.841082	0.840831	0.817732
38.475	0.808055	0.812913	0.828177	0.823125	0.834802		38.475	0.818419	0.810277	0.826504	0.823236	0.842331	0.844481	0.823263
38.525	0.806834	0.810333	0.828083	0.82342	0.836332		38.525	0.818347	0.811417	0.831411	0.822997	0.843086	0.845974	0.821365
38.575	0.807358	0.813305	0.827095	0.824053	0.836772		38.575	0.819899	0.814204	0.827995	0.823762	0.839885	0.845554	0.818725
38.625	0.811443	0.814034	0.828383	0.824285	0.837679		38.625	0.818742	0.810479	0.830323	0.824726	0.841802	0.843773	0.819057
38.675	0.810453	0.811646	0.832253	0.824622	0.838166		38.675	0.818322	0.813664	0.829531	0.824998	0.844157	0.843248	0.817535
38.725	0.810049	0.811709	0.831865	0.824828	0.838269		38.725	0.818756	0.813853	0.830307	0.825415	0.844824	0.844235	0.825212
38.775	0.811493	0.813791	0.830781	0.825903	0.837623		38.775	0.818534	0.81542	0.830988	0.825802	0.845731	0.843946	0.827909
38.825	0.812425	0.814623	0.831728	0.826768	0.838346		38.825	0.818762	0.816677	0.83059	0.826818	0.845719	0.847024	0.829214
38.875	0.811737	0.816085	0.830168	0.827235	0.83977		38.875	0.818861	0.816402	0.835519	0.826946	0.846874	0.847296	0.825934
38.925	0.813627	0.816156	0.832745	0.827289	0.839468		38.925	0.820721	0.816147	0.829043	0.827261	0.846146	0.846537	0.830249
38.975	0.817056	0.81355	0.835594	0.827941	0.840087		38.975	0.821775	0.816413	0.83459	0.828529	0.845678	0.849334	0.826532
39.025	0.815378	0.817304	0.832917	0.827937	0.841637		39.025	0.823462	0.818259	0.83312	0.828927	0.848675	0.847215	0.82385
39.075	0.816114	0.817951	0.833286	0.829515	0.839946		39.075	0.82585	0.819343	0.834104	0.829516	0.845743	0.848405	0.8269
39.125	0.813993	0.817785	0.833513	0.829021	0.839902		39.125	0.822168	0.820266	0.833476	0.830438	0.84961	0.847416	0.827056
39.175	0.815784	0.818507	0.834086	0.829598	0.84193		39.175	0.825916	0.821223	0.834863	0.830463	0.848473	0.848235	0.826031
39.225	0.819145	0.820536	0.835029	0.830441	0.841448		39.225	0.825005	0.818301	0.836946	0.831239	0.848363	0.849985	0.823697
39.275	0.819479	0.82215	0.834171	0.831134	0.842745		39.275	0.825381	0.821591	0.838169	0.831517	0.848968	0.848153	0.828737
39.325	0.821159	0.819677	0.834177	0.831886	0.84263		39.325	0.82546	0.821574	0.835656	0.832354	0.848739	0.851493	0.827726
39.375	0.81912	0.821414	0.835687	0.831439	0.843127		39.375	0.82628	0.823043	0.83546	0.832259	0.850493	0.850699	0.831851
39.425	0.817815	0.823466	0.834972	0.83326	0.844384		39.425	0.829656	0.821641	0.835789	0.832409	0.849209	0.849532	0.829896
39.475	0.820336	0.823042	0.83965	0.834094	0.845427		39.475	0.829409	0.823814	0.834601	0.833068	0.854029	0.851781	0.830639
39.525	0.822556	0.824386	0.836217	0.834019	0.845672		39.525	0.829338	0.823549	0.837454	0.83396	0.851275	0.849293	0.829776
39.575	0.822251	0.824038	0.83693	0.834111	0.845171		39.575	0.828729	0.825686	0.838061	0.8341	0.850349	0.851634	0.824059
39.625	0.821705	0.825049	0.839286	0.834776	0.845758		39.625	0.827958	0.82635	0.837816	0.834695	0.854397	0.854098	0.831345
39.675	0.822821	0.824992	0.841027	0.835531	0.845942		39.675	0.830788	0.826474	0.842215	0.835508	0.8519	0.851916	0.830462
39.725	0.824381	0.825792	0.840914	0.835492	0.84767		39.725	0.829168	0.828672	0.837476	0.836602	0.855398	0.853913	0.831547
39.775	0.821944	0.827948	0.845223	0.836201	0.846542		39.775	0.8296	0.828412	0.839524	0.836439	0.854794	0.854423	0.833204
39.825	0.825119	0.827363	0.838729	0.837183	0.84813		39.825	0.829461	0.82591	0.840629	0.837085	0.853698	0.856759	0.830063
39.875	0.826303	0.828402	0.841628	0.838144	0.848013		39.875	0.83468	0.829355	0.844278	0.837865	0.854301	0.854988	0.831764
39.925	0.825202	0.82661	0.841022	0.838586	0.848155		39.925	0.83102	0.830613	0.844555	0.838268	0.853965	0.855293	0.837862
39.975	0.828308	0.82989	0.841869	0.839347	0.849184		39.975	0.833895	0.828363	0.842298	0.838419	0.85656	0.855153	0.83325
40.025	0.827294	0.830708	0.844643	0.839326	0.849514		40.025	0.833967	0.83015	0.840785	0.839756	0.856793	0.855392	0.833971
40.075	0.828866	0.829075	0.8436	0.839446	0.850737		40.075	0.836208	0.83212	0.843393	0.840212	0.856832	0.857768	0.836302
40.125	0.828981	0.830896	0.845833	0.839896	0.849004		40.125	0.836998	0.830769	0.848278	0.839888	0.854018	0.856885	0.839233
40.175	0.829953	0.832768	0.848476	0.841048	0.850761		40.175	0.835598	0.833791	0.842033	0.840587	0.85744	0.856938	0.834592
40.225	0.829513	0.831246	0.845596	0.841655	0.849932		40.225	0.837531	0.834515	0.843617	0.841505	0.857635	0.856918	0.841694
40.275	0.828574	0.833662	0.846469	0.841795	0.851749		40.275	0.836537	0.833022	0.842093	0.841425	0.858019	0.858537	0.837726
40.325	0.832152	0.83367	0.847925	0.842585	0.851961		40.325	0.839415	0.835034	0.84592	0.842236	0.859183	0.85888	0.835632
40.375	0.831019	0.835038	0.846372	0.842783	0.852641		40.375	0.836593	0.834873	0.846311	0.842875	0.858523	0.859404	0.839416
40.425	0.833993	0.833906	0.84956	0.843466	0.851974		40.425	0.838889	0.834366	0.842297	0.843563	0.861511	0.85837	0.839258
40.475	0.832767	0.836388	0.844938	0.84339	0.85367		40.475	0.837376	0.835809	0.847053	0.843718	0.858371	0.858982	0.837995
40.525	0.836152	0.833838	0.847855	0.844365	0.853929		40.525	0.840182	0.836241	0.845729	0.844499	0.8592	0.85994	0.840818
40.575	0.834764	0.835771	0.847353	0.845219	0.854371		40.575	0.841301	0.83717	0.85058	0.845085	0.861373	0.861369	0.836793
40.625	0.836595	0.835859	0.848274	0.845762	0.854131		40.625	0.839422	0.83721	0.843776	0.845489	0.860695	0.861667	0.841181
40.675	0.836817	0.838318	0.851529	0.845633	0.855089		40.675	0.842945	0.839794	0.852975	0.845886	0.861025	0.860339	0.840692
40.725	0.834523	0.836905	0.845024	0.846247	0.855575		40.725	0.843048	0.838718	0.850303	0.846327	0.862627	0.863359	0.840076
40.775	0.836067	0.838267	0.846916	0.847002	0.856552		40.775	0.843157	0.836935	0.851737	0.846901	0.863424	0.862037	0.845163
40.825	0.837509	0.840894	0.849474	0.847169	0.857616		40.825	0.842772	0.837116	0.85044	0.847516	0.864287	0.861783	0.845872
40.875	0.838415	0.839707	0.852883	0.847401	0.85711		40.875	0.842352	0.839569	0.852537	0.848155	0.864664	0.862662	0.847545
40.925	0.839623	0.841624	0.851748	0.848369	0.857107		40.925	0.844428	0.838598	0.851357	0.848174	0.862182	0.863066	0.84149
40.975	0.840788	0.840986	0.851835	0.848378	0.857033		40.975	0.842508	0.841985	0.852596	0.84898	0.862772	0.863436	0.843733
41.025	0.839732	0.841293	0.848972	0.849511	0.858754		41.025	0.845549	0.844052	0.853697	0.849884	0.863524	0.862173	0.844495
41.075	0.842284	0.84097	0.854844	0.850478	0.858206		41.075	0.846768	0.842565	0.854062	0.849912	0.866002	0.862604	0.841311
41.125	0.841803	0.84178	0.85386	0.850696	0.859169		41.125	0.846238	0.84428	0.855875	0.850817	0.866168	0.864927	0.848403
41.175	0.841316	0.842004	0.852853	0.851015	0.860289		41.175	0.845468	0.844266	0.856182	0.851641	0.865764	0.865814	0.842906
41.225	0.843802	0.845084	0.850843	0.851355	0.859269		41.225	0.844002	0.845464	0.853471	0.851425	0.865311	0.865356	0.848983
41.275	0.843435	0.846755	0.854503	0.852257	0.858875		41.275	0.847835	0.846984	0.856354	0.851551	0.866806	0.86552	0.84976
41.325	0.845463	0.843721	0.85615	0.852398	0.861397		41.325	0.84866	0.84644	0.854246	0.851954	0.864364	0.867726	0.846995
41.375	0.844421	0.844918	0.854272	0.852722	0.860604		41.375	0.850605	0.849316	0.855162	0.852917	0.86687	0.868985	0.845485
41.425	0.844736	0.847438	0.853486	0.853815	0.862113		41.425	0.848527	0.846181	0.859505	0.853644	0.866903	0.865716	0.851709
41.475	0.848889	0.845493	0.856552	0.853885	0.861077		41.475	0.84979	0.846566	0.857697	0.854364	0.866342	0.86731	0.846893
41.525	0.847547	0.847039	0.857216	0.854643	0.862395		41.525	0.851888	0.848101	0.853795	0.854996	0.869007	0.868067	0.850714
41.575	0.846759	0.848953	0.853747	0.854771	0.863558		41.575	0.854225	0.848417	0.855347	0.854782	0.868111	0.867897	0.850114
41.625	0.845923	0.848724	0.860872	0.854951	0.86368		41.625	0.849831	0.847808	0.860229	0.855309	0.866389	0.870282	0.846941
41.675	0.848027	0.848185	0.858633	0.856242	0.864224		41.675	0.85323	0.848947	0.858743	0.856541	0.868724	0.869862	0.846746
41.725	0.848501	0.850048	0.859114	0.856108	0.864398		41.725	0.849171	0.84941	0.85699	0.856639	0.869934	0.870995	0.850319
41.775	0.848915	0.848967	0.858942	0.856908	0.864277		41.775	0.851005	0.851256	0.860944	0.857004	0.868366	0.869483	0.853387
41.825	0.848987	0.851008	0.860948	0.857146	0.865847		41.825	0.85241	0.852711	0.855898	0.857389	0.868561	0.870173	0.846943
41.875	0.850411	0.85102	0.859013	0.857575	0.866778		41.875	0.852441	0.852247	0.858261	0.858391	0.872057	0.871544	0.857219
41.925	0.851027	0.850341	0.861125	0.858917	0.867042		41.925	0.852551	0.852567	0.860414	0.858452	0.870656	0.870627	0.851522
41.975	0.854613	0.851977	0.857861	0.858894	0.865245		41.975	0.852826	0.851463	0.860428	0.858549	0.871783	0.870028	0.852883
42.025	0.854869	0.853881	0.862249	0.859267	0.866785		42.025	0.857245	0.855157	0.862197	0.85957	0.873144	0.871078	0.850527
42.075	0.853247	0.853609	0.860643	0.859759	0.86819		42.075	0.853589	0.854889	0.863513	0.859968	0.871818	0.872002	0.854039
42.125	0.852622	0.853611	0.864876	0.860715	0.86821		42.125	0.856629	0.855065	0.863941	0.860557	0.871005	0.874472	0.855472
42.175	0.852879	0.852068	0.865587	0.860495	0.869381		42.175	0.858935	0.85402	0.862196	0.861175	0.872081	0.871762	0.85427
42.225	0.856422	0.857473	0.864128	0.861237	0.868325		42.225	0.855737	0.853001	0.864931	0.861921	0.872667	0.875565	0.855976
42.275	0.853097	0.85406	0.863574	0.861764	0.869564		42.275	0.859014	0.857568	0.865836	0.86204	0.873099	0.876901	0.849507
42.325	0.857251	0.856887	0.865383	0.862714	0.868685		42.325	0.860411	0.858764	0.862078	0.862782	0.87303	0.873254	0.855465
42.375	0.855954	0.854206	0.863173	0.863018	0.870225		42.375	0.859015	0.856255	0.864917	0.863395	0.87664	0.874602	0.853887
42.425	0.857699	0.858481	0.862947	0.863179	0.869901		42.425	0.859565	0.856346	0.865628	0.863244	0.875149	0.876328	0.857623
42.475	0.858914	0.858829	0.864193	0.863817	0.870317		42.475	0.860801	0.858559	0.865508	0.863809	0.876175	0.876475	0.854432
42.525	0.859613	0.85953	0.866392	0.864252	0.870425		42.525	0.859233	0.85958	0.864991	0.863735	0.874013	0.8756	0.853196
42.575	0.856773	0.85987	0.863315	0.864772	0.871478		42.575	0.860715	0.860347	0.865316	0.86431	0.879197	0.876028	0.857772
42.625	0.860395	0.859388	0.865213	0.865183	0.871864		42.625	0.861639	0.859788	0.866669	0.86558	0.876752	0.87776	0.855023
42.675	0.862727	0.862169	0.867193	0.866134	0.871033		42.675	0.862781	0.86103	0.865271	0.865747	0.878016	0.876302	0.860343
42.725	0.862137	0.860968	0.865423	0.865818	0.872853		42.725	0.861005	0.860863	0.868152	0.86661	0.877932	0.878871	0.860526
42.775	0.863819	0.861432	0.868989	0.866992	0.872829		42.775	0.863568	0.863381	0.869668	0.867313	0.879927	0.879211	0.86423
42.825	0.863293	0.862649	0.867888	0.867675	0.872767		42.825	0.863193	0.86271	0.868104	0.867491	0.880725	0.876881	0.859782
42.875	0.863604	0.862311	0.869473	0.867327	0.874392		42.875	0.866476	0.862741	0.868049	0.868268	0.879418	0.878548	0.861923
42.925	0.862842	0.864211	0.865795	0.868372	0.875241		42.925	0.864565	0.863658	0.867284	0.868307	0.880554	0.878803	0.859105
42.975	0.861745	0.861797	0.868167	0.869095	0.87438		42.975	0.864489	0.863703	0.869008	0.869076	0.877942	0.88041	0.865909
43.025	0.863247	0.864679	0.869707	0.869688	0.874655		43.025	0.868194	0.862509	0.867728	0.869234	0.881179	0.882395	0.864683
43.075	0.866495	0.864764	0.86816	0.868944	0.875321		43.075	0.866962	0.86407	0.871594	0.86947	0.881012	0.880127	0.863787
43.125	0.865357	0.866445	0.870803	0.870015	0.876511		43.125	0.865709	0.867242	0.869574	0.870126	0.881061	0.880888	0.864107
43.175	0.866589	0.866542	0.872376	0.870827	0.875785		43.175	0.865881	0.865767	0.872251	0.870616	0.880912	0.881128	0.862834
43.225	0.866158	0.865417	0.868682	0.871366	0.876329		43.225	0.865174	0.866762	0.871854	0.871047	0.882712	0.883258	0.866533
43.275	0.868071	0.867491	0.874833	0.871391	0.878195		43.275	0.865576	0.866639	0.870142	0.871793	0.882326	0.880272	0.861684
43.325	0.867608	0.8681	0.870127	0.872202	0.877234		43.325	0.86614	0.866431	0.869751	0.872327	0.881211	0.881653	0.868515
43.375	0.867126	0.867517	0.872653	0.872608	0.877548		43.375	0.869348	0.868625	0.874115	0.872455	0.88088	0.882968	0.869641
43.425	0.871282	0.868641	0.874053	0.872462	0.879583		43.425	0.867802	0.868051	0.875007	0.873299	0.883407	0.881661	0.868433
43.475	0.867696	0.868304	0.871189	0.873317	0.878042		43.475	0.868841	0.870022	0.871921	0.873333	0.882404	0.883428	0.865145
43.525	0.869239	0.870149	0.875908	0.87404	0.879977		43.525	0.872139	0.870228	0.875952	0.873575	0.885494	0.88506	0.863024
43.575	0.868809	0.870334	0.87064	0.873902	0.880255		43.575	0.871684	0.869997	0.872706	0.874294	0.886676	0.884175	0.865125
43.625	0.871166	0.870503	0.87477	0.875397	0.878901		43.625	0.8733	0.871726	0.876472	0.874809	0.885444	0.885471	0.866072
43.675	0.874107	0.869904	0.873541	0.875414	0.880453		43.675	0.870213	0.871689	0.875039	0.875831	0.884668	0.884531	0.869313
43.725	0.87048	0.871154	0.877088	0.875822	0.88107		43.725	0.872429	0.872323	0.874109	0.876073	0.886405	0.885363	0.866448
43.775	0.873525	0.871218	0.876639	0.876084	0.881553		43.775	0.874254	0.873818	0.872776	0.876179	0.885817	0.884889	0.868675
43.825	0.873524	0.873517	0.876848	0.876572	0.881896		43.825	0.875516	0.872419	0.876675	0.876314	0.885371	0.888446	0.86975
43.875	0.873885	0.874184	0.876749	0.876596	0.881667		43.875	0.875075	0.873175	0.877662	0.876723	0.886618	0.887757	0.862542
43.925	0.873813	0.87486	0.877724	0.877559	0.88081		43.925	0.875972	0.873786	0.880401	0.877865	0.886974	0.887899	0.870088
43.975	0.872146	0.874964	0.880406	0.878247	0.883471		43.975	0.874351	0.874752	0.879666	0.877877	0.886395	0.887594	0.870219
44.025	0.873445	0.876388	0.876322	0.87828	0.884024		44.025	0.877379	0.874393	0.879063	0.878953	0.887959	0.887841	0.869117
44.075	0.876058	0.87734	0.880349	0.879213	0.883643		44.075	0.877162	0.876432	0.876093	0.879541	0.88839	0.888401	0.874011
44.125	0.874822	0.875617	0.878671	0.87952	0.883761		44.125	0.873893	0.877334	0.877084	0.879499	0.887504	0.888128	0.874648
44.175	0.874477	0.875451	0.880017	0.879655	0.884714		44.175	0.876892	0.878012	0.880617	0.879417	0.889089	0.889824	0.869907
44.225	0.87765	0.877105	0.88156	0.880738	0.885875		44.225	0.88028	0.87762	0.878313	0.880729	0.888719	0.892063	0.870539
44.275	0.876139	0.877012	0.882057	0.881213	0.885391		44.275	0.879893	0.87766	0.879346	0.881257	0.889796	0.888434	0.873051
44.325	0.876467	0.877312	0.883013	0.880457	0.886086		44.325	0.879957	0.876066	0.879501	0.881696	0.888982	0.889252	0.870142
44.375	0.878647	0.877423	0.881676	0.881458	0.885808		44.375	0.878706	0.87961	0.879551	0.882105	0.888919	0.890975	0.873241
44.425	0.876921	0.879522	0.881498	0.882298	0.887106		44.425	0.878286	0.878405	0.883186	0.882164	0.891318	0.892013	0.874952
44.475	0.880636	0.879643	0.881561	0.882722	0.887143		44.475	0.879953	0.878507	0.882831	0.883643	0.890239	0.890566	0.871966
44.525	0.880975	0.880043	0.882953	0.883322	0.88651		44.525	0.881043	0.879564	0.883942	0.883211	0.891686	0.890895	0.870841
44.575	0.880226	0.878693	0.885909	0.884037	0.887943		44.575	0.881449	0.879743	0.884886	0.883739	0.892847	0.893835	0.873377
44.625	0.882873	0.883227	0.883337	0.884522	0.887619		44.625	0.881585	0.881382	0.884775	0.88372	0.891111	0.890583	0.875567
44.675	0.880174	0.881197	0.885196	0.884518	0.888229		44.675	0.882075	0.881018	0.884023	0.884373	0.893781	0.89048	0.882701
44.725	0.88431	0.882303	0.882379	0.885252	0.887432		44.725	0.883158	0.881607	0.885486	0.884759	0.892138	0.889712	0.875098
44.775	0.885229	0.882204	0.884098	0.885634	0.889467		44.775	0.883729	0.881859	0.884749	0.885535	0.893619	0.893642	0.876855
44.825	0.884475	0.883291	0.883054	0.88593	0.88835		44.825	0.884792	0.884527	0.884823	0.885938	0.895347	0.896313	0.875405
44.875	0.885224	0.883168	0.885971	0.886568	0.890232		44.875	0.885767	0.882969	0.884268	0.885831	0.895734	0.893769	0.877149
44.925	0.883858	0.882508	0.888933	0.886665	0.89209		44.925	0.88422	0.885194	0.885545	0.886708	0.895605	0.894062	0.879476
44.975	0.886829	0.886204	0.884732	0.887942	0.892287		44.975	0.885247	0.885641	0.883103	0.88755	0.895803	0.895228	0.87635
45.025	0.886925	0.885363	0.884693	0.887891	0.891322		45.025	0.882029	0.88613	0.885521	0.888126	0.89482	0.895274	0.874502
45.075	0.886415	0.884994	0.885166	0.887934	0.891248		45.075	0.887277	0.885811	0.887249	0.888203	0.89574	0.897413	0.874362
45.125	0.886228	0.885662	0.88597	0.887864	0.892602		45.125	0.888816	0.885527	0.889408	0.888742	0.894941	0.895087	0.880894
45.175	0.885463	0.886934	0.885521	0.889084	0.892989		45.175	0.88891	0.886352	0.892837	0.889226	0.89401	0.894718	0.878945
45.225	0.886634	0.886702	0.889218	0.889911	0.893461		45.225	0.884712	0.887444	0.885948	0.889385	0.895329	0.895266	0.875354
45.275	0.8868	0.888814	0.891613	0.889641	0.895455		45.275	0.889457	0.889276	0.888226	0.89043	0.897086	0.897369	0.882784
45.325	0.888153	0.888327	0.890351	0.890351	0.893713		45.325	0.887085	0.889136	0.885917	0.890815	0.89758	0.89623	0.886401
45.375	0.887147	0.887569	0.8918	0.89109	0.895098		45.375	0.890088	0.888373	0.890114	0.890607	0.898679	0.897886	0.881152
45.425	0.88797	0.889021	0.892023	0.891462	0.894324		45.425	0.890377	0.889803	0.891643	0.891416	0.897728	0.898873	0.883262
45.475	0.891102	0.888556	0.890622	0.891587	0.895134		45.475	0.888895	0.891955	0.891311	0.891435	0.898564	0.898816	0.883259
45.525	0.888027	0.891421	0.890478	0.891764	0.895277		45.525	0.893885	0.889739	0.892197	0.89224	0.896551	0.897762	0.88354
45.575	0.892305	0.888713	0.888005	0.892915	0.897991		45.575	0.891183	0.890822	0.890298	0.893134	0.899957	0.897163	0.879863
45.625	0.892854	0.890836	0.890456	0.893111	0.897351		45.625	0.889998	0.889848	0.890005	0.892552	0.897643	0.901224	0.885026
45.675	0.890163	0.889726	0.8912	0.894058	0.897006		45.675	0.891595	0.892212	0.893358	0.893469	0.898445	0.89937	0.886952
45.725	0.889268	0.892256	0.891614	0.893562	0.896564		45.725	0.892593	0.89332	0.893734	0.894074	0.899433	0.900418	0.886086
45.775	0.894595	0.891253	0.894375	0.894218	0.898671		45.775	0.894825	0.89548	0.894096	0.89478	0.902612	0.899527	0.88795
45.825	0.894579	0.893741	0.891951	0.894431	0.897168		45.825	0.89331	0.893262	0.8914	0.895217	0.9014	0.900982	0.887761
45.875	0.893811	0.892433	0.895865	0.895168	0.899101		45.875	0.894521	0.892426	0.892616	0.895223	0.900994	0.899747	0.886973
45.925	0.892691	0.895066	0.890095	0.895601	0.898501		45.925	0.892891	0.895047	0.893647	0.896055	0.900946	0.902659	0.888924
45.975	0.892183	0.894371	0.896248	0.896356	0.898562		45.975	0.891927	0.893095	0.894055	0.895481	0.902405	0.903551	0.88848
46.025	0.892755	0.894295	0.897046	0.89717	0.899899		46.025	0.893039	0.895214	0.897403	0.896337	0.901853	0.903899	0.880255
46.075	0.894634	0.895311	0.894379	0.897416	0.901173		46.075	0.895301	0.895574	0.896965	0.897129	0.901626	0.901225	0.889241
46.125	0.896405	0.893183	0.897369	0.897368	0.900236		46.125	0.895455	0.89677	0.895403	0.897378	0.905086	0.902315	0.892693
46.175	0.894772	0.895139	0.895162	0.897608	0.900884		46.175	0.895686	0.896654	0.899875	0.897563	0.901937	0.903541	0.888584
46.225	0.895726	0.8967	0.895912	0.897902	0.899565		46.225	0.895978	0.899511	0.896793	0.898182	0.903832	0.902907	0.891298
46.275	0.896596	0.895987	0.897239	0.898078	0.902422		46.275	0.896389	0.897356	0.897611	0.898259	0.905711	0.903802	0.891271
46.325	0.896797	0.898292	0.896092	0.899334	0.901645		46.325	0.898316	0.899656	0.896306	0.898799	0.905858	0.902998	0.891479
46.375	0.895914	0.896787	0.896779	0.89963	0.90104		46.375	0.898206	0.898556	0.896654	0.899923	0.905111	0.90567	0.89192
46.425	0.898682	0.900266	0.89931	0.900024	0.902515		46.425	0.899673	0.898341	0.899556	0.900037	0.903608	0.905181	0.891722
46.475	0.897929	0.898546	0.896321	0.9005	0.902022		46.475	0.898153	0.89682	0.898892	0.900854	0.903749	0.905516	0.888478
46.525	0.900499	0.900598	0.90159	0.900599	0.902645		46.525	0.902903	0.899079	0.897486	0.900759	0.906392	0.905559	0.893512
46.575	0.898365	0.899807	0.898165	0.90133	0.904058		46.575	0.898387	0.899272	0.901415	0.90122	0.904736	0.906275	0.892733
46.625	0.898603	0.900848	0.898002	0.901448	0.904911		46.625	0.902959	0.900367	0.898165	0.901448	0.905514	0.907904	0.8903
46.675	0.901424	0.900645	0.901896	0.901872	0.904871		46.675	0.90133	0.901119	0.902942	0.902099	0.905058	0.907721	0.899367
46.725	0.902386	0.900781	0.899007	0.902792	0.904328		46.725	0.900202	0.901668	0.901509	0.902986	0.90772	0.907259	0.891852
46.775	0.901904	0.901701	0.902485	0.902639	0.906616		46.775	0.902992	0.902253	0.900472	0.902919	0.906333	0.90745	0.895338
46.825	0.901054	0.904044	0.90413	0.903206	0.905793		46.825	0.902008	0.903319	0.900542	0.903705	0.90605	0.907405	0.892082
46.875	0.902674	0.903083	0.902524	0.903648	0.907022		46.875	0.904447	0.90352	0.904001	0.903328	0.908815	0.908429	0.895485
46.925	0.902172	0.903387	0.901688	0.904302	0.906562		46.925	0.902953	0.902468	0.905533	0.904875	0.910363	0.908392	0.900262
46.975	0.900789	0.90278	0.901857	0.904964	0.906855		46.975	0.902146	0.905061	0.90156	0.90453	0.907146	0.908548	0.894055
47.025	0.903503	0.904889	0.908208	0.904827	0.907951		47.025	0.904145	0.904705	0.905259	0.905026	0.908877	0.908961	0.900483
47.075	0.904103	0.904701	0.904366	0.905145	0.907014		47.075	0.904399	0.903925	0.904528	0.905315	0.907505	0.909389	0.899125
47.125	0.90786	0.90584	0.905984	0.905978	0.907131		47.125	0.905397	0.902951	0.902419	0.906172	0.909373	0.909002	0.89901
47.175	0.903848	0.904138	0.904556	0.906551	0.908523		47.175	0.905245	0.906521	0.90163	0.906675	0.910478	0.90973	0.89578
47.225	0.905729	0.90384	0.906862	0.906369	0.90873		47.225	0.907592	0.904946	0.907738	0.907413	0.910702	0.910618	0.90092
47.275	0.904837	0.905492	0.902981	0.907221	0.908829		47.275	0.906116	0.907899	0.903575	0.907217	0.908284	0.911967	0.899849
47.325	0.905697	0.905618	0.907665	0.907261	0.910064		47.325	0.905783	0.906869	0.904265	0.907489	0.911251	0.913357	0.899934
47.375	0.907016	0.907446	0.904389	0.907257	0.909858		47.375	0.908709	0.909388	0.90806	0.908122	0.911587	0.913919	0.902631
47.425	0.907879	0.907951	0.906878	0.908861	0.909982		47.425	0.909284	0.906946	0.910012	0.908839	0.913858	0.91333	0.896996
47.475	0.908091	0.908886	0.905557	0.908945	0.911212		47.475	0.910218	0.907589	0.909577	0.909264	0.91415	0.912856	0.901531
47.525	0.909821	0.908257	0.908592	0.909032	0.910679		47.525	0.909037	0.907981	0.907123	0.909779	0.914678	0.913239	0.896892
47.575	0.911927	0.909873	0.908229	0.91037	0.911794		47.575	0.907594	0.90918	0.905966	0.909466	0.913398	0.912412	0.903226
47.625	0.911158	0.910123	0.907689	0.910498	0.911049		47.625	0.908912	0.907392	0.907017	0.910132	0.915119	0.913196	0.903514
47.675	0.908486	0.908457	0.908694	0.910563	0.911043		47.675	0.909354	0.910461	0.908027	0.910234	0.913951	0.912456	0.901558
47.725	0.905607	0.908944	0.907953	0.911229	0.912959		47.725	0.910682	0.908826	0.906714	0.9108	0.91486	0.913975	0.904651
47.775	0.912574	0.909864	0.913124	0.910779	0.913471		47.775	0.912271	0.911054	0.909228	0.911452	0.915266	0.911865	0.900502
47.825	0.910628	0.913427	0.908954	0.912541	0.913768		47.825	0.910149	0.909785	0.910071	0.911495	0.915387	0.91472	0.905838
47.875	0.912988	0.911199	0.909245	0.912187	0.91398		47.875	0.911523	0.912125	0.911529	0.912048	0.915011	0.912896	0.901466
47.925	0.913125	0.91242	0.910089	0.912994	0.914851		47.925	0.912859	0.913214	0.907902	0.912152	0.916523	0.914671	0.902007
47.975	0.910616	0.913361	0.912286	0.91326	0.914173		47.975	0.909724	0.913474	0.908969	0.912681	0.91493	0.915177	0.901801
48.025	0.911023	0.913612	0.913459	0.913368	0.913644		48.025	0.913671	0.912881	0.910448	0.912872	0.915283	0.915107	0.904703
48.075	0.911853	0.91426	0.910103	0.913708	0.915154		48.075	0.914577	0.914464	0.911309	0.913213	0.915941	0.91704	0.903964
48.125	0.913143	0.913486	0.910014	0.913831	0.91584		48.125	0.913137	0.913973	0.913858	0.914468	0.916712	0.917173	0.90743
48.175	0.91481	0.914951	0.910983	0.914401	0.916351		48.175	0.916121	0.91423	0.90926	0.914964	0.916736	0.915406	0.904301
48.225	0.916077	0.91595	0.914723	0.914562	0.914472		48.225	0.914742	0.914782	0.913746	0.915015	0.916976	0.917312	0.899417
48.275	0.914887	0.916332	0.911637	0.91538	0.916439		48.275	0.916187	0.916713	0.913299	0.915403	0.918185	0.916374	0.90814
48.325	0.914594	0.916553	0.912026	0.915966	0.915579		48.325	0.917448	0.917675	0.911301	0.915904	0.917758	0.918464	0.907005
48.375	0.916697	0.915947	0.915204	0.915714	0.917782		48.375	0.916986	0.914647	0.916974	0.916309	0.918391	0.91548	0.90299
48.425	0.914365	0.916369	0.918096	0.917075	0.918089		48.425	0.914165	0.917168	0.915166	0.91618	0.918521	0.916925	0.907589
48.475	0.9164	0.918622	0.912979	0.91705	0.918763		48.475	0.916096	0.916817	0.916447	0.9169	0.920457	0.919774	0.904085
48.525	0.916462	0.918023	0.915581	0.91748	0.918533		48.525	0.916543	0.917858	0.916971	0.917143	0.920366	0.920078	0.908707
48.575	0.916169	0.918033	0.913727	0.917654	0.920396		48.575	0.919247	0.915829	0.917531	0.918078	0.919583	0.91796	0.909391
48.625	0.915943	0.919806	0.918127	0.918159	0.919256		48.625	0.918689	0.917958	0.914123	0.917888	0.921262	0.921254	0.914379
48.675	0.917713	0.917076	0.91749	0.918396	0.919623		48.675	0.918757	0.919886	0.919086	0.918555	0.921255	0.921877	0.909363
48.725	0.921818	0.919095	0.917228	0.919484	0.920597		48.725	0.919627	0.918498	0.917153	0.918656	0.920515	0.921347	0.906338
48.775	0.917695	0.919915	0.922416	0.919378	0.921448		48.775	0.918081	0.921039	0.916161	0.919546	0.924006	0.921011	0.910294
48.825	0.91982	0.920033	0.918983	0.919937	0.921167		48.825	0.918877	0.920742	0.918092	0.919166	0.919757	0.921271	0.908715
48.875	0.920174	0.920489	0.922429	0.919921	0.921577		48.875	0.920684	0.921775	0.920069	0.919861	0.922043	0.91948	0.913538
48.925	0.9208	0.920397	0.921558	0.920625	0.922276		48.925	0.919818	0.921436	0.921464	0.920943	0.921272	0.921476	0.910505
48.975	0.919829	0.922008	0.918651	0.920669	0.922169		48.975	0.921339	0.921899	0.919119	0.920975	0.921486	0.923404	0.908617
49.025	0.920171	0.922245	0.919547	0.921151	0.921559		49.025	0.920746	0.922118	0.920809	0.921473	0.921979	0.922409	0.914808
49.075	0.92124	0.922155	0.920539	0.922111	0.922626		49.075	0.92351	0.921434	0.920246	0.921903	0.922772	0.923473	0.913596
49.125	0.919691	0.923058	0.921827	0.921898	0.922028		49.125	0.92191	0.922709	0.919333	0.922751	0.924363	0.921336	0.915631
49.175	0.922166	0.92342	0.922947	0.922587	0.922908		49.175	0.922364	0.923179	0.922813	0.922814	0.923749	0.921893	0.913654
49.225	0.922823	0.922959	0.920522	0.922905	0.923857		49.225	0.92308	0.923042	0.923041	0.92278	0.923972	0.925307	0.915298
49.275	0.923564	0.923368	0.922543	0.923635	0.925481		49.275	0.923944	0.922953	0.921163	0.923667	0.925302	0.924876	0.915953
49.325	0.924162	0.924297	0.922284	0.923392	0.923769		49.325	0.924157	0.923583	0.921715	0.923854	0.923906	0.923898	0.912513
49.375	0.924062	0.92437	0.922437	0.924066	0.924341		49.375	0.923741	0.924703	0.921004	0.924008	0.924221	0.925431	0.916101
49.425	0.92369	0.924255	0.923977	0.923902	0.924863		49.425	0.92428	0.923909	0.922917	0.92395	0.924087	0.924229	0.916421
49.475	0.924172	0.923926	0.924471	0.924884	0.925061		49.475	0.926361	0.927146	0.922713	0.925076	0.926246	0.92546	0.913353
49.525	0.923642	0.923912	0.923319	0.925278	0.926151		49.525	0.9278	0.925219	0.922392	0.925223	0.925397	0.926188	0.914064
49.575	0.923954	0.928385	0.924311	0.92548	0.925835		49.575	0.923292	0.927372	0.923252	0.925397	0.925693	0.927999	0.915695
49.625	0.926454	0.925706	0.922776	0.925917	0.926472		49.625	0.925311	0.926016	0.92973	0.926158	0.9264	0.925392	0.91749
49.675	0.924409	0.926881	0.923653	0.926271	0.927486		49.675	0.925067	0.928895	0.925806	0.925882	0.927117	0.926594	0.914906
49.725	0.925821	0.926569	0.924239	0.926997	0.926661		49.725	0.92565	0.928841	0.927327	0.927046	0.927487	0.927089	0.916109
49.775	0.926343	0.928274	0.926567	0.927077	0.927631		49.775	0.924982	0.927159	0.926587	0.926585	0.927013	0.928389	0.918034
49.825	0.929498	0.926986	0.92533	0.926769	0.927393		49.825	0.926482	0.9288	0.925566	0.927668	0.928867	0.926787	0.918665
49.875	0.92551	0.927494	0.923981	0.927967	0.928526		49.875	0.927425	0.92993	0.926491	0.927934	0.926728	0.927951	0.920291
49.925	0.92551	0.929957	0.926624	0.927929	0.927995		49.925	0.928346	0.929601	0.924721	0.928492	0.929152	0.928696	0.91983
49.975	0.928417	0.928761	0.926621	0.928828	0.929309		49.975	0.927679	0.929234	0.925381	0.928576	0.926795	0.928915	0.922392
50.025	0.930716	0.929218	0.928153	0.928899	0.929089		50.025	0.92834	0.930065	0.927284	0.929154	0.929413	0.928003	0.916601
50.075	0.92826	0.929962	0.925588	0.929065	0.930074		50.075	0.929692	0.930435	0.925211	0.929743	0.929566	0.928389	0.91825
50.125	0.930293	0.931515	0.927846	0.929705	0.930392		50.125	0.931341	0.930712	0.929837	0.930176	0.92932	0.930338	0.917952
50.175	0.931566	0.930367	0.927598	0.930703	0.9297		50.175	0.929527	0.930149	0.925633	0.929916	0.930849	0.929798	0.924038
50.225	0.931985	0.931502	0.930814	0.930613	0.930428		50.225	0.930914	0.93202	0.930129	0.930306	0.930063	0.929179	0.920694
50.275	0.93204	0.932508	0.930058	0.930345	0.931347		50.275	0.930045	0.929974	0.929173	0.930863	0.92979	0.931668	0.924698
50.325	0.934622	0.933305	0.929626	0.931157	0.931279		50.325	0.932037	0.932172	0.928829	0.931064	0.930265	0.931029	0.924723
50.375	0.932117	0.932067	0.932192	0.931435	0.931403		50.375	0.933293	0.933225	0.927609	0.931925	0.929307	0.932717	0.92236
50.425	0.933613	0.932979	0.928457	0.932072	0.931303		50.425	0.93147	0.934679	0.929026	0.932084	0.932634	0.93291	0.92213
50.475	0.932757	0.931854	0.928654	0.932378	0.932212		50.475	0.930708	0.93304	0.929266	0.932172	0.932739	0.931498	0.922619
50.525	0.932821	0.932662	0.932687	0.932304	0.932929		50.525	0.929617	0.933458	0.929921	0.932776	0.93133	0.933503	0.926012
50.575	0.934492	0.932971	0.931368	0.932984	0.932811		50.575	0.932467	0.933397	0.929562	0.933131	0.933276	0.93266	0.921705
50.625	0.931733	0.935456	0.931784	0.933625	0.934424		50.625	0.931747	0.93456	0.931539	0.933449	0.934	0.932664	0.920827
50.675	0.934933	0.935443	0.932579	0.933807	0.932354		50.675	0.932594	0.93601	0.930229	0.933922	0.933302	0.932368	0.92488
50.725	0.933227	0.935444	0.931698	0.934353	0.933279		50.725	0.932823	0.936504	0.932238	0.933935	0.931609	0.933645	0.922531
50.775	0.93589	0.934549	0.932894	0.934536	0.935338		50.775	0.935356	0.935655	0.932519	0.934469	0.933764	0.933217	0.923441
50.825	0.935457	0.936974	0.934479	0.93464	0.935774		50.825	0.935416	0.936624	0.935419	0.934803	0.93416	0.932743	0.927104
50.875	0.937663	0.934922	0.934385	0.935233	0.934383		50.875	0.935971	0.936321	0.933003	0.935413	0.934822	0.933552	0.927523
50.925	0.935703	0.936894	0.935106	0.93521	0.934416		50.925	0.934501	0.938017	0.93454	0.93531	0.934316	0.934523	0.924598
50.975	0.939087	0.9375	0.930133	0.936124	0.936046		50.975	0.936658	0.938116	0.934695	0.936102	0.935084	0.934685	0.92959
51.025	0.939155	0.936227	0.932431	0.936702	0.935815		51.025	0.937606	0.937307	0.934479	0.935903	0.934887	0.935123	0.929721
51.075	0.935731	0.939287	0.933965	0.936787	0.934428		51.075	0.937847	0.93664	0.935799	0.937129	0.935741	0.934677	0.928469
51.125	0.937518	0.93861	0.93685	0.937392	0.937193		51.125	0.936249	0.938121	0.937241	0.936889	0.934001	0.935846	0.928236
51.175	0.935352	0.938291	0.933592	0.93711	0.936578		51.175	0.937763	0.939089	0.934907	0.937483	0.936442	0.93793	0.931429
51.225	0.938827	0.940112	0.938208	0.937731	0.936717		51.225	0.938097	0.938681	0.933688	0.938034	0.936652	0.935779	0.93087
51.275	0.938783	0.940946	0.934621	0.938263	0.936629		51.275	0.939257	0.939722	0.938714	0.938126	0.937924	0.936493	0.929495
51.325	0.940638	0.939475	0.933969	0.938655	0.937778		51.325	0.939822	0.941179	0.935584	0.93789	0.936353	0.935022	0.929924
51.375	0.940981	0.938615	0.935841	0.938651	0.938715		51.375	0.939139	0.941461	0.93918	0.938588	0.93802	0.936937	0.933986
51.425	0.94063	0.940778	0.935836	0.939076	0.938896		51.425	0.941639	0.940999	0.935279	0.939176	0.937712	0.937043	0.930735
51.475	0.941621	0.94029	0.936831	0.939454	0.938207		51.475	0.940599	0.941254	0.936189	0.93935	0.938286	0.93651	0.933188
51.525	0.941114	0.941989	0.936707	0.939329	0.939866		51.525	0.941982	0.943375	0.93643	0.940294	0.938424	0.936269	0.933674
51.575	0.940716	0.941481	0.939584	0.940337	0.939536		51.575	0.94157	0.941666	0.940918	0.940417	0.938495	0.938282	0.931653
51.625	0.943873	0.941355	0.937018	0.94048	0.939783		51.625	0.941248	0.941407	0.937725	0.940626	0.939456	0.940027	0.932571
51.675	0.941931	0.943498	0.938282	0.941012	0.941412		51.675	0.941975	0.942777	0.939045	0.940779	0.938846	0.938733	0.933282
51.725	0.942625	0.943704	0.937608	0.941451	0.941041		51.725	0.939407	0.941881	0.938768	0.941861	0.939103	0.939584	0.93295
51.775	0.946403	0.943622	0.941075	0.94121	0.940224		51.775	0.942713	0.943616	0.938203	0.941567	0.93908	0.939654	0.934471
51.825	0.94307	0.942967	0.941614	0.941462	0.941145		51.825	0.942611	0.942121	0.938945	0.942144	0.940231	0.939143	0.933699
51.875	0.943646	0.944246	0.939294	0.942117	0.941304		51.875	0.94257	0.944673	0.93792	0.942262	0.940875	0.940114	0.93287
51.925	0.9449	0.943532	0.936577	0.942613	0.941135		51.925	0.943475	0.944199	0.938875	0.942689	0.940977	0.939328	0.936198
51.975	0.944386	0.943969	0.938882	0.943284	0.941629		51.975	0.943408	0.946025	0.939627	0.943117	0.943547	0.941654	0.933802
52.025	0.944438	0.945895	0.939618	0.943028	0.942497		52.025	0.942163	0.946743	0.940235	0.943191	0.939763	0.941698	0.939313
52.075	0.94824	0.94397	0.94096	0.943607	0.942623		52.075	0.94553	0.944997	0.941485	0.943875	0.940864	0.940847	0.939295
52.125	0.946678	0.947728	0.9417	0.944273	0.942082		52.125	0.945486	0.945183	0.941825	0.943517	0.941818	0.941965	0.935463
52.175	0.944704	0.946109	0.940026	0.944688	0.943467		52.175	0.944803	0.946231	0.94119	0.944525	0.941869	0.941847	0.940809
52.225	0.944472	0.947334	0.943644	0.944925	0.943031		52.225	0.943546	0.947007	0.940384	0.945045	0.941692	0.943455	0.937368
52.275	0.947062	0.947226	0.943567	0.945412	0.944864		52.275	0.945252	0.945393	0.943237	0.944963	0.942252	0.941681	0.937409
52.325	0.948988	0.947566	0.94546	0.945211	0.943088		52.325	0.944223	0.94557	0.940904	0.94543	0.943261	0.943954	0.937788
52.375	0.947141	0.947502	0.941488	0.945735	0.945346		52.375	0.946791	0.946828	0.939739	0.945835	0.943773	0.941661	0.93927
52.425	0.94613	0.94906	0.941492	0.946381	0.944959		52.425	0.945437	0.947324	0.944914	0.945824	0.942381	0.943312	0.939467
52.475	0.949117	0.947919	0.944329	0.946643	0.944502		52.475	0.947381	0.948934	0.941559	0.946568	0.944683	0.943896	0.937221
52.525	0.950227	0.947424	0.943657	0.946977	0.946328		52.525	0.946465	0.948829	0.943826	0.946406	0.943548	0.943783	0.936747
52.575	0.949499	0.948653	0.945376	0.946846	0.945221		52.575	0.948331	0.951076	0.943954	0.947298	0.944741	0.942946	0.941537
52.625	0.945438	0.949648	0.94488	0.947206	0.94657		52.625	0.947262	0.948915	0.945631	0.947307	0.944921	0.947394	0.941175
52.675	0.949368	0.950434	0.946647	0.947842	0.946111		52.675	0.947873	0.94977	0.944913	0.947653	0.944338	0.944157	0.938982
52.725	0.95103	0.950727	0.944906	0.9483	0.947093		52.725	0.947146	0.950195	0.945116	0.947898	0.945896	0.946071	0.939908
52.775	0.949785	0.951352	0.947602	0.948058	0.946616		52.775	0.949145	0.951116	0.948355	0.948184	0.946848	0.944192	0.938862
52.825	0.950585	0.952529	0.944874	0.94875	0.947401		52.825	0.949417	0.951637	0.945392	0.948834	0.945751	0.945336	0.937683
52.875	0.949692	0.951005	0.948509	0.949273	0.94706		52.875	0.949974	0.950625	0.944488	0.948787	0.944248	0.946399	0.941614
52.925	0.950068	0.951325	0.949393	0.949558	0.947804		52.925	0.951008	0.951421	0.947929	0.949809	0.945103	0.945488	0.939891
52.975	0.951832	0.95156	0.945909	0.949482	0.947118		52.975	0.94842	0.951358	0.951767	0.950148	0.947391	0.945617	0.938842
53.025	0.952308	0.952265	0.950099	0.949818	0.948336		53.025	0.949419	0.953034	0.9464	0.950029	0.946579	0.946277	0.942402
53.075	0.953215	0.954066	0.948993	0.950453	0.948164		53.075	0.951434	0.953599	0.94706	0.950467	0.947777	0.947616	0.939625
53.125	0.951936	0.953814	0.947483	0.950758	0.950429		53.125	0.950906	0.954033	0.948543	0.950654	0.9476	0.945694	0.946273
53.175	0.954367	0.953239	0.947389	0.951299	0.94959		53.175	0.952077	0.954195	0.950895	0.951168	0.947866	0.947878	0.944469
53.225	0.95175	0.952663	0.950481	0.950859	0.949589		53.225	0.95244	0.953105	0.947485	0.951252	0.947804	0.946383	0.941874
53.275	0.955245	0.954928	0.952114	0.951469	0.950281		53.275	0.9507	0.955263	0.948894	0.951297	0.946913	0.948092	0.947709
53.325	0.95382	0.954726	0.951029	0.952035	0.949258		53.325	0.952729	0.954042	0.94926	0.951872	0.947976	0.946233	0.945833
53.375	0.952707	0.954096	0.951096	0.952503	0.951026		53.375	0.951018	0.956084	0.947891	0.951971	0.949689	0.94831	0.944869
53.425	0.954943	0.955154	0.950639	0.952999	0.951083		53.425	0.952679	0.956294	0.95053	0.952691	0.949153	0.949799	0.942889
53.475	0.955926	0.956431	0.950991	0.952595	0.950865		53.475	0.952511	0.955061	0.952237	0.953195	0.950565	0.949912	0.94426
53.525	0.956059	0.955322	0.951725	0.953463	0.951891		53.525	0.952746	0.955249	0.951508	0.95355	0.949916	0.951609	0.949496
53.575	0.955796	0.957555	0.950557	0.953793	0.952216		53.575	0.952803	0.956754	0.949573	0.95346	0.950177	0.951045	0.948939
53.625	0.955258	0.957765	0.952747	0.954084	0.951909		53.625	0.956289	0.95651	0.950377	0.953938	0.950452	0.951135	0.948481
53.675	0.95664	0.957216	0.95318	0.954675	0.952215		53.675	0.95554	0.957362	0.950469	0.95366	0.950217	0.950057	0.944887
53.725	0.956093	0.957562	0.951463	0.954622	0.953312		53.725	0.956105	0.958242	0.951028	0.95426	0.952189	0.951048	0.943413
53.775	0.958318	0.957636	0.949892	0.954498	0.952874		53.775	0.955751	0.959323	0.951475	0.954428	0.950815	0.953171	0.94914
53.825	0.958759	0.957404	0.949998	0.955568	0.952886		53.825	0.953836	0.957483	0.95275	0.954964	0.951686	0.949766	0.950568
53.875	0.956994	0.958258	0.952291	0.955792	0.953658		53.875	0.954865	0.959889	0.953688	0.95577	0.950317	0.952479	0.947225
53.925	0.960066	0.958252	0.950584	0.956187	0.952756		53.925	0.956498	0.95671	0.953816	0.955519	0.952363	0.951334	0.946231
53.975	0.957962	0.957845	0.955513	0.956042	0.95369		53.975	0.955289	0.958664	0.952299	0.956095	0.950039	0.954007	0.946803
54.025	0.96018	0.959631	0.955101	0.956582	0.954138		54.025	0.955642	0.960648	0.953602	0.956063	0.952118	0.95149	0.951647
54.075	0.958454	0.957982	0.9542	0.956651	0.95397		54.075	0.957063	0.96043	0.956794	0.957006	0.95373	0.951421	0.94997
54.125	0.961053	0.960363	0.952967	0.95664	0.954191		54.125	0.955993	0.959325	0.957226	0.956738	0.95282	0.954294	0.951096
54.175	0.960966	0.960559	0.955635	0.957442	0.954782		54.175	0.959156	0.960197	0.953584	0.957523	0.952643	0.952309	0.953048
54.225	0.959205	0.961938	0.95618	0.957757	0.954931		54.225	0.956949	0.959728	0.95468	0.957569	0.953039	0.953948	0.955126
54.275	0.96157	0.96111	0.955726	0.957953	0.956168		54.275	0.959014	0.961774	0.955655	0.958428	0.954257	0.953779	0.952912
54.325	0.961733	0.961177	0.955964	0.958913	0.956299		54.325	0.957639	0.961789	0.955209	0.958681	0.952993	0.953695	0.954042
54.375	0.96245	0.961947	0.957367	0.958344	0.958401		54.375	0.960356	0.961441	0.957097	0.959475	0.952565	0.955613	0.95393
54.425	0.961479	0.961078	0.956256	0.958901	0.957106		54.425	0.959856	0.962829	0.95608	0.95883	0.953658	0.953946	0.948991
54.475	0.962587	0.963216	0.959214	0.959114	0.957457		54.475	0.957818	0.962893	0.958166	0.959268	0.953261	0.954874	0.952871
54.525	0.962653	0.96175	0.95569	0.959113	0.957892		54.525	0.960433	0.961218	0.955308	0.95911	0.954786	0.955495	0.949833
54.575	0.964155	0.962183	0.96086	0.96008	0.957735		54.575	0.959543	0.962134	0.956806	0.960051	0.953518	0.954488	0.949524
54.625	0.964724	0.963752	0.956666	0.959926	0.957773		54.625	0.960546	0.962852	0.957914	0.960389	0.955324	0.95319	0.956011
54.675	0.96422	0.962483	0.955115	0.960344	0.957613		54.675	0.959628	0.962249	0.957062	0.960699	0.955917	0.956631	0.952795
54.725	0.966229	0.962714	0.95685	0.960685	0.958844		54.725	0.962424	0.964351	0.958801	0.960706	0.95541	0.95574	0.951488
54.775	0.96345	0.963505	0.96048	0.960868	0.959024		54.775	0.961031	0.963343	0.956732	0.96106	0.957391	0.957423	0.956045
54.825	0.964912	0.96447	0.960107	0.961523	0.958712		54.825	0.961368	0.96294	0.956659	0.961422	0.957353	0.958641	0.959415
54.875	0.963378	0.965248	0.958185	0.962219	0.958635		54.875	0.961902	0.96457	0.960933	0.961821	0.957818	0.958109	0.958084
54.925	0.965512	0.96576	0.960123	0.962403	0.958312		54.925	0.960851	0.965638	0.959725	0.962033	0.956432	0.957154	0.954984
54.975	0.966596	0.965325	0.957933	0.962382	0.95752		54.975	0.96165	0.965054	0.960952	0.962488	0.957448	0.957689	0.952356
55.025	0.964504	0.966753	0.96208	0.962144	0.960173		55.025	0.963143	0.966076	0.960549	0.962804	0.957697	0.957086	0.9573
55.075	0.966415	0.965799	0.961457	0.962702	0.961036		55.075	0.96309	0.966286	0.96055	0.963159	0.958504	0.956701	0.952013
55.125	0.968373	0.965652	0.957104	0.96318	0.961328		55.125	0.964407	0.966599	0.960694	0.963135	0.960016	0.957839	0.955618
55.175	0.965933	0.965872	0.960506	0.963617	0.960887		55.175	0.964434	0.966574	0.962493	0.963754	0.958187	0.95881	0.956348
55.225	0.965989	0.966679	0.962289	0.964022	0.961863		55.225	0.963847	0.965951	0.963217	0.963887	0.958112	0.958417	0.963052
55.275	0.968091	0.967722	0.961496	0.963861	0.961291		55.275	0.963668	0.967466	0.960766	0.963889	0.959677	0.959586	0.959108
55.325	0.966863	0.967296	0.960907	0.964502	0.961237		55.325	0.963717	0.967303	0.962829	0.964394	0.958413	0.958659	0.962322
55.375	0.967319	0.967618	0.963006	0.964922	0.962148		55.375	0.964557	0.968013	0.961096	0.964765	0.957987	0.959679	0.956797
55.425	0.967104	0.967252	0.961188	0.964933	0.962501		55.425	0.965668	0.968057	0.963178	0.965153	0.960942	0.959629	0.958398
55.475	0.967106	0.968491	0.962508	0.965009	0.962844		55.475	0.965822	0.968579	0.961958	0.965568	0.960481	0.960311	0.957987
55.525	0.970543	0.969286	0.96116	0.96578	0.961656		55.525	0.965575	0.967965	0.964588	0.965419	0.959476	0.95997	0.960043
55.575	0.970383	0.9692	0.963091	0.965868	0.962277		55.575	0.967466	0.969172	0.961835	0.965285	0.963235	0.962147	0.959345
55.625	0.96876	0.968351	0.961718	0.965903	0.962864		55.625	0.968022	0.969723	0.964891	0.966165	0.961863	0.960233	0.960371
55.675	0.971781	0.9698	0.963595	0.966301	0.964701		55.675	0.964886	0.968811	0.961146	0.966454	0.96195	0.960271	0.95846
55.725	0.969027	0.968419	0.965889	0.96708	0.964241		55.725	0.969811	0.969355	0.965823	0.96654	0.96046	0.96126	0.962189
55.775	0.969055	0.969884	0.964335	0.966476	0.963758		55.775	0.968636	0.970298	0.964589	0.967265	0.960384	0.960696	0.959776
55.825	0.970534	0.969949	0.964286	0.967569	0.964096		55.825	0.967163	0.969304	0.963344	0.967153	0.960334	0.96019	0.963803
55.875	0.971583	0.971135	0.964436	0.966918	0.964637		55.875	0.966943	0.969944	0.965799	0.967546	0.963075	0.961365	0.956501
55.925	0.971137	0.97188	0.965754	0.967426	0.964676		55.925	0.968268	0.970461	0.965289	0.968165	0.963462	0.962939	0.963518
55.975	0.971151	0.97047	0.966189	0.96829	0.965236		55.975	0.968681	0.968019	0.962651	0.967681	0.963223	0.962984	0.964013
56.025	0.97062	0.970667	0.965564	0.968178	0.966016		56.025	0.970036	0.970152	0.967826	0.968108	0.964222	0.961788	0.959367
56.075	0.973467	0.97007	0.966401	0.968563	0.965643		56.075	0.968544	0.968742	0.964869	0.968505	0.963702	0.964042	0.965627
56.125	0.971917	0.970221	0.967092	0.968799	0.965064		56.125	0.971019	0.971696	0.965695	0.968647	0.965505	0.964	0.960982
56.175	0.974132	0.971168	0.964504	0.968964	0.965243		56.175	0.97074	0.972209	0.967552	0.969183	0.963842	0.964182	0.96086
56.225	0.971634	0.972926	0.96628	0.969054	0.965642		56.225	0.969355	0.972445	0.966807	0.969265	0.963731	0.964889	0.966057
56.275	0.973385	0.971725	0.966407	0.969677	0.966789		56.275	0.969483	0.97273	0.968064	0.969271	0.964897	0.963644	0.964109
56.325	0.974726	0.97294	0.967952	0.970145	0.965549		56.325	0.970922	0.971945	0.965594	0.970161	0.964209	0.964725	0.963181
56.375	0.974597	0.972193	0.967157	0.97045	0.967402		56.375	0.969418	0.972983	0.966644	0.969846	0.964707	0.964076	0.963299
56.425	0.972045	0.973625	0.9684	0.970153	0.967044		56.425	0.971479	0.973326	0.969971	0.970598	0.96632	0.965267	0.964575
56.475	0.976051	0.973392	0.968797	0.970649	0.967893		56.475	0.972011	0.973053	0.967956	0.970328	0.966597	0.965583	0.964735
56.525	0.975229	0.974041	0.96946	0.971256	0.967535		56.525	0.971761	0.973569	0.968287	0.971448	0.965132	0.966259	0.964323
56.575	0.975981	0.973471	0.968869	0.971019	0.968403		56.575	0.973199	0.975231	0.970269	0.971624	0.966339	0.964879	0.964427
56.625	0.975271	0.975137	0.968063	0.971574	0.967782		56.625	0.972109	0.975497	0.969672	0.971926	0.966237	0.966378	0.965427
56.675	0.975478	0.975773	0.968546	0.971965	0.968827		56.675	0.97389	0.975248	0.969706	0.971704	0.966705	0.96693	0.967459
56.725	0.97613	0.974805	0.971111	0.972624	0.969995		56.725	0.973356	0.975217	0.969523	0.972291	0.966929	0.96652	0.965236
56.775	0.974121	0.975408	0.970493	0.972257	0.968444		56.775	0.972887	0.974834	0.971717	0.97237	0.968142	0.967191	0.969084
56.825	0.977768	0.976234	0.969424	0.972891	0.969263		56.825	0.972107	0.974941	0.973423	0.972474	0.967172	0.967524	0.967903
56.875	0.976309	0.976454	0.96899	0.973218	0.969381		56.875	0.974331	0.97396	0.972203	0.973132	0.968106	0.966516	0.966887
56.925	0.977219	0.975501	0.969272	0.973547	0.969972		56.925	0.973993	0.977926	0.970592	0.973404	0.966594	0.967402	0.970354
56.975	0.978281	0.97775	0.971712	0.973716	0.970564		56.975	0.976776	0.977172	0.972904	0.973447	0.968509	0.968272	0.969361
57.025	0.978396	0.977501	0.973092	0.973655	0.971748		57.025	0.975311	0.977347	0.969731	0.973566	0.967279	0.96958	0.970256
57.075	0.978564	0.976298	0.971156	0.974344	0.970093		57.075	0.975652	0.977084	0.975131	0.97427	0.969793	0.968603	0.96789
57.125	0.97788	0.977415	0.971723	0.973973	0.97097		57.125	0.974905	0.976571	0.975209	0.974045	0.967983	0.970229	0.971165
57.175	0.976504	0.978433	0.971865	0.974923	0.97093		57.175	0.975844	0.97591	0.972608	0.974879	0.967424	0.968361	0.968073
57.225	0.980724	0.9773	0.975083	0.974472	0.972155		57.225	0.975003	0.978012	0.972447	0.97461	0.967989	0.97087	0.968563
57.275	0.980145	0.979213	0.97311	0.975109	0.971841		57.275	0.976747	0.979317	0.973747	0.974827	0.971415	0.970661	0.969307
57.325	0.979405	0.977944	0.973753	0.975002	0.971108		57.325	0.978125	0.97701	0.974129	0.975691	0.970085	0.96981	0.96839
57.375	0.980506	0.97967	0.972072	0.9755	0.972355		57.375	0.974962	0.976943	0.971566	0.975597	0.969524	0.970418	0.974235
57.425	0.980567	0.978458	0.974041	0.976318	0.972225		57.425	0.974515	0.977768	0.973365	0.975915	0.971464	0.970155	0.970117
57.475	0.980237	0.978778	0.97723	0.976125	0.973285		57.475	0.977589	0.97816	0.972447	0.976156	0.968837	0.968618	0.971164
57.525	0.979103	0.97802	0.973304	0.976251	0.972798		57.525	0.978901	0.978603	0.973999	0.976105	0.971167	0.968307	0.970487
57.575	0.981257	0.981484	0.974504	0.977224	0.972864		57.575	0.9783	0.979984	0.973455	0.976269	0.970826	0.969565	0.970543
57.625	0.981408	0.980946	0.974337	0.977082	0.972896		57.625	0.978627	0.980122	0.974019	0.976818	0.973142	0.970554	0.967088
57.675	0.981643	0.981162	0.973302	0.977181	0.97394		57.675	0.978922	0.979682	0.974645	0.976947	0.971972	0.970434	0.972729
57.725	0.979732	0.979266	0.972479	0.977293	0.973814		57.725	0.977664	0.979851	0.976142	0.977288	0.971239	0.97032	0.973739
57.775	0.979738	0.982153	0.976694	0.977854	0.974977		57.775	0.980615	0.98022	0.976537	0.977248	0.971319	0.973177	0.971783
57.825	0.98361	0.980799	0.977835	0.97789	0.97499		57.825	0.978357	0.980711	0.976588	0.977884	0.971723	0.973183	0.974628
57.875	0.981703	0.980803	0.979022	0.978085	0.975396		57.875	0.97962	0.982839	0.974495	0.977773	0.971627	0.972365	0.970766
57.925	0.982251	0.98145	0.977181	0.978472	0.97424		57.925	0.979653	0.981851	0.974872	0.978048	0.971751	0.972755	0.973637
57.975	0.983377	0.979949	0.976772	0.978721	0.974967		57.975	0.98082	0.982474	0.977822	0.978671	0.973555	0.972675	0.974982
58.025	0.984919	0.982528	0.978078	0.979346	0.975811		58.025	0.9805	0.981169	0.977129	0.978973	0.97389	0.974529	0.971621
58.075	0.983306	0.982179	0.979275	0.978786	0.975687		58.075	0.981953	0.981316	0.977865	0.979495	0.972311	0.971214	0.974091
58.125	0.982219	0.982802	0.978947	0.979055	0.975839		58.125	0.981242	0.981757	0.977928	0.979335	0.974323	0.975014	0.971552
58.175	0.981788	0.981909	0.976412	0.980166	0.97577		58.175	0.982309	0.984595	0.977065	0.979061	0.973713	0.974617	0.973568
58.225	0.985306	0.982544	0.978892	0.979782	0.975968		58.225	0.982309	0.982752	0.978495	0.980065	0.97568	0.971709	0.973308
58.275	0.985412	0.982376	0.975636	0.979891	0.977422		58.275	0.982506	0.983609	0.980192	0.979667	0.974042	0.974413	0.974186
58.325	0.983495	0.982889	0.977283	0.98027	0.976296		58.325	0.982561	0.984556	0.980033	0.980872	0.975652	0.973503	0.975188
58.375	0.985519	0.983603	0.978765	0.980801	0.975907		58.375	0.983047	0.983105	0.977206	0.980758	0.975673	0.974613	0.976466
58.425	0.986663	0.98351	0.979864	0.980891	0.978063		58.425	0.983524	0.982702	0.97689	0.980988	0.974317	0.975454	0.977156
58.475	0.984707	0.985594	0.980013	0.980844	0.977499		58.475	0.982376	0.983749	0.980705	0.981197	0.974548	0.973579	0.978169
58.525	0.986427	0.984777	0.978509	0.981386	0.978614		58.525	0.983188	0.98412	0.978197	0.981379	0.974732	0.974898	0.974751
58.575	0.985941	0.984616	0.979681	0.98169	0.978196		58.575	0.982131	0.985147	0.979911	0.981511	0.974657	0.97453	0.975157
58.625	0.985282	0.986025	0.980028	0.981951	0.978729		58.625	0.98404	0.983562	0.978238	0.982078	0.974963	0.975847	0.975982
58.675	0.988847	0.98457	0.981757	0.982093	0.979319		58.675	0.983213	0.984169	0.982036	0.982321	0.977163	0.976485	0.972499
58.725	0.985924	0.984768	0.979675	0.982745	0.978055		58.725	0.983578	0.98488	0.980501	0.982551	0.976606	0.975193	0.977821
58.775	0.987305	0.984966	0.980127	0.982748	0.978379		58.775	0.983549	0.985414	0.982484	0.982425	0.97833	0.976303	0.977257
58.825	0.98865	0.985998	0.980025	0.982618	0.981022		58.825	0.985774	0.986241	0.980111	0.983087	0.97718	0.97493	0.979532
58.875	0.98621	0.986449	0.981923	0.982921	0.978947		58.875	0.985751	0.986357	0.981376	0.983167	0.978504	0.977986	0.976053
58.925	0.986824	0.987456	0.981524	0.983407	0.980148		58.925	0.982895	0.984927	0.980932	0.983005	0.977249	0.979389	0.979457
58.975	0.989839	0.986611	0.980284	0.983442	0.980092		58.975	0.986603	0.986912	0.980613	0.98382	0.976654	0.977865	0.979566
59.025	0.988124	0.98675	0.980542	0.983765	0.979515		59.025	0.984962	0.987262	0.98166	0.983943	0.978499	0.979194	0.980706
59.075	0.990146	0.986715	0.983711	0.984372	0.980705		59.075	0.986241	0.987234	0.98218	0.983948	0.979713	0.976967	0.982144
59.125	0.989682	0.986707	0.981767	0.984341	0.980909		59.125	0.985982	0.987286	0.982474	0.984288	0.976617	0.979046	0.976003
59.175	0.990063	0.986473	0.981529	0.984744	0.980421		59.175	0.984527	0.987104	0.982867	0.984094	0.977791	0.980171	0.980157
59.225	0.989681	0.986766	0.982393	0.984669	0.980587		59.225	0.985989	0.987724	0.981734	0.984659	0.979337	0.977532	0.980555
59.275	0.989277	0.988755	0.983727	0.984687	0.982247		59.275	0.988308	0.989413	0.984994	0.985047	0.97885	0.978591	0.98256
59.325	0.989269	0.988715	0.982378	0.985334	0.981147		59.325	0.987232	0.989248	0.980624	0.985192	0.979435	0.978654	0.980881
59.375	0.990259	0.988335	0.984445	0.985738	0.980717		59.375	0.987043	0.988848	0.985636	0.985548	0.979407	0.97981	0.979145
59.425	0.9926	0.988168	0.981554	0.986013	0.980616		59.425	0.989218	0.988998	0.983598	0.985583	0.979421	0.978458	0.978929
59.475	0.991445	0.990484	0.986094	0.985585	0.983291		59.475	0.989647	0.988601	0.98462	0.985682	0.979652	0.980648	0.981058
59.525	0.99107	0.988262	0.985771	0.986556	0.981207		59.525	0.988174	0.989269	0.985251	0.986344	0.981202	0.980744	0.987117
59.575	0.990009	0.990071	0.985075	0.986413	0.981762		59.575	0.989426	0.990205	0.98548	0.986615	0.979585	0.980917	0.982884
59.625	0.991431	0.989301	0.983165	0.986832	0.982827		59.625	0.990255	0.990529	0.986521	0.986272	0.980625	0.981215	0.9823
59.675	0.993559	0.989694	0.986137	0.986977	0.983978		59.675	0.988275	0.989062	0.983839	0.986625	0.981121	0.979858	0.984019
59.725	0.988834	0.990187	0.984906	0.987183	0.984137		59.725	0.98694	0.991139	0.983282	0.987105	0.981063	0.980612	0.980303
59.775	0.992405	0.990665	0.985672	0.987111	0.982331		59.775	0.988782	0.989364	0.983212	0.987724	0.983154	0.980576	0.983743
59.825	0.993088	0.990968	0.984455	0.987111	0.983455		59.825	0.989458	0.989965	0.984881	0.987216	0.982105	0.981222	0.980751
59.875	0.994355	0.990022	0.985089	0.988131	0.984305		59.875	0.99027	0.990066	0.986437	0.987745	0.981044	0.980679	0.981318
59.925	0.993699	0.990198	0.987497	0.988231	0.9839		59.925	0.989663	0.990451	0.988096	0.987908	0.981685	0.98209	0.986208
59.975	0.993487	0.990879	0.987399	0.988053	0.984406		59.975	0.992032	0.991507	0.985367	0.988531	0.982982	0.98154	0.98571
