# Supplementary material for: Direct and indirect salt effects on homotypic phase separation
Source: eLife. 2024 Nov 12;13:RP100282. doi: 10.7554/eLife.100282 (PMC11556789; doi:10.7554/eLife.100282)
Supplement: Figure 3—source data 1. [file elife-100282-fig3-data1.xlsx]

## Sheet: Figure 3
A							B
								Total bound ions
	Cl-						[NaCl] (mM)	Na+ 1st -shell	stdev	Cl- 1st -shell	stdev	Na+ 1st + 2nd -shell	stdev	Cl- 1st + 2nd -shell	stdev
Amino Acid Type	1st – shell ions per residue	stdev	Total 1st – shell ions	stdev			50	1.80088	0.31338	9.18023	0.27929	2.95612	0.446815	26.5576	0.82641
ARG	0.268299	0.00550336	21.4639	0.440269			150	4.39824	0.513829	14.8829	0.630728	7.92363	0.602935	41.8431	1.06884
LYS	0.220699	0.00988775	3.53119	0.158204			300	12.1561	1.53295	21.7317	0.73245	21.0441	2.41512	62.3376	1.24868
GLN	0.0542564	0.00579566	1.73621	0.185461			500	18.3459	0.784274	29.0335	0.600629	31.816	1.02102	82.7968	1.42694
ASN	0.0481615	0.00499072	5.0088	0.519035			1000	35.6445	2.32751	46.7211	1.4968	64.0538	4.17273	135.646	4.90322
SER	0.0475026	0.003112	8.36046	0.547712
BB	0.0128276	0.000301537	13.4433	0.316011
							C
	Na+							Net Charge
Amino Acid Type	1st – shell ions per residue	stdev	Total 1st – shell ions	stdev			[NaCl] (mM)	1st + 2nd -shell	stdev
ASP	0.168995	0.0168772	4.05588	0.405054			50	48.3985	0.961864
ASN	0.0713253	0.00799579	7.41783	0.831562			150	38.0806	0.472575
GLN	0.051445	0.00919194	1.64624	0.294142			300	30.7065	1.72876
BB	0.0266383	0.00164729	27.9169	1.72636			500	21.0192	0.436493
SER	0.0244624	0.00188988	4.30538	0.332618			1000	0.407337	0.853698
