# Supplementary material for: Direct and indirect salt effects on homotypic phase separation
Source: eLife. 2024 Nov 12;13:RP100282. doi: 10.7554/eLife.100282 (PMC11556789; doi:10.7554/eLife.100282)
Supplement: Figure 4—source data 1. [file elife-100282-fig4-data1.xlsx]

## Sheet: Figure 4
B
	Brg Ions
[NaCl] (mM)	Cl-	stdev	Na+	stdev
50	4.68982	0.422056	0.483407	0.245644
150	8.68003	1.03626	1.14714	0.40019
300	12.1694	2.01873	3.22701	0.495883
500	17.4275	1.44167	5.5045	0.919561
1000	26.6451	1.31941	10.9098	1.34699
C
	Cl- ion count
# of chains per ion	50 mM	stdev	150 mM	stdev	300 mM	stdev	500 mM	stdev	1000 mM	stdev
1	21.8678	0.897487	33.163	1.02898	50.1681	2.49134	65.3693	1.18637	109.001	5.90306
2	4.31657	0.374051	7.52529	0.771221	10.6557	1.34297	15.3041	1.12674	23.7427	0.967445
3	0.357857	0.0633951	1.08816	0.344268	1.39684	0.6452	1.9931	0.410845	2.70852	0.265522
4	0.0152939	0.0140695	0.0663735	0.0365783	0.116553	0.0826376	0.129848	0.0673949	0.181128	0.120205
5	9.996e-05	0.000173136	0.00019992	0.000346272	0.00029988	0.00033153	0.0004998	0.000865679	0.0127949	0.0214744
	Na+ ion count
# of chains per ion	50 mM	stdev	150 mM	stdev	300 mM	stdev	500 mM	stdev	1000 mM	stdev
1	2.47271	0.511369	6.77649	0.581661	17.8171	2.48406	26.3115	1.19165	53.1439	4.30886
2	0.47561	0.241235	1.03009	0.377871	2.98341	0.365676	4.97701	1.02887	9.97151	1.34469
3	0.00779688	0.00665166	0.116853	0.0552426	0.240304	0.157301	0.516293	0.245615	0.926829	0.363615
4	0	0	0.00019992	0.00019992	0.00329868	0.00367956	0.0110956	0.0151369	0.0114954	0.0100095
5	0	0	0	0	0	0	9.996e-05	0.000173136	0	0
