# Supplementary material for: Direct and indirect salt effects on homotypic phase separation
Source: eLife. 2024 Nov 12;13:RP100282. doi: 10.7554/eLife.100282 (PMC11556789; doi:10.7554/eLife.100282)
Supplement: Figure 5—figure supplement 1—source data 1. [file elife-100282-fig5-figsupp1-data1.xlsx]

## Sheet: Supplementary Figure 4
A				B				C				D
	g(r)				g(r)				g(r)				g(r)
	Tyr with Cation				Tyr with Phe				Tyr with Amino				Asp with Arg/Lys
Distance (Å)	50 mM	1000 mM		Distance (Å)	50 mM	1000 mM		Distance (Å)	50 mM	1000 mM		Distance (Å)	50 mM	1000 mM
0.025	0	0		0.025	0	0		0.025	0	0		0.025	0	0
0.075	0	0		0.075	0	0		0.075	0	0		0.075	0	0
0.125	0	0		0.125	0	0		0.125	0	0		0.125	0	0
0.175	0	0		0.175	0	0		0.175	0	0		0.175	0	0
0.225	0	0		0.225	0	0		0.225	0	0		0.225	0	0
0.275	0	0		0.275	0	0		0.275	0	0		0.275	0	0
0.325	0	0		0.325	0	0		0.325	0	0		0.325	0	0
0.375	0	0		0.375	0	0		0.375	0	0		0.375	0	0
0.425	0	0		0.425	0	0		0.425	0	0		0.425	0	0
0.475	0	0		0.475	0	0		0.475	0	0		0.475	0	0
0.525	0	0		0.525	0	0		0.525	0	0		0.525	0	0
0.575	0	0		0.575	0	0		0.575	0	0		0.575	0	0
0.625	0	0		0.625	0	0		0.625	0	0		0.625	0	0
0.675	0	0		0.675	0	0		0.675	0	0		0.675	0	0
0.725	0	0		0.725	0	0		0.725	0	0		0.725	0	0
0.775	0	0		0.775	0	0		0.775	0	0		0.775	0	0
0.825	0	0		0.825	0	0		0.825	0	0		0.825	0	0
0.875	0	0		0.875	0	0		0.875	0	0		0.875	0	0
0.925	0	0		0.925	0	0		0.925	0	0		0.925	0	0
0.975	0	0		0.975	0	0		0.975	0	0		0.975	0	0
1.025	0	0		1.025	0	0		1.025	0	0		1.025	0	0
1.075	0	0		1.075	0	0		1.075	0	0		1.075	0	0
1.125	0	0		1.125	0	0		1.125	0	0		1.125	0	0
1.175	0	0		1.175	0	0		1.175	0	0		1.175	0	0
1.225	0	0		1.225	0	0		1.225	0	0		1.225	0	0
1.275	0	0		1.275	0	0		1.275	0	0		1.275	0	0
1.325	0	0		1.325	0	0		1.325	0	0		1.325	0	0
1.375	0	0		1.375	0	0		1.375	0	0		1.375	0	0
1.425	0	0		1.425	0	0		1.425	0	0		1.425	0.000956567	0.000302668
1.475	0	0		1.475	0	0		1.475	0	0		1.475	0.0161089	0.0170205
1.525	0	0		1.525	0	0		1.525	0	0		1.525	0.109672	0.112665
1.575	0	0		1.575	0	0		1.575	0	0		1.575	0.43739	0.423468
1.625	0	0		1.625	0	0		1.625	0	0		1.625	0.910072	0.894082
1.675	0	0		1.675	0	0		1.675	0	0		1.675	1.3127	1.29085
1.725	0	0		1.725	0	0		1.725	0	0		1.725	1.41031	1.40391
1.775	7.01e-05	0		1.775	1.6e-05	1.41e-05		1.775	1.93e-05	2e-05		1.775	1.23826	1.23437
1.825	1.6e-05	4.38e-05		1.825	6.58e-05	5.42e-05		1.825	3.45e-05	5.18e-05		1.825	0.953157	0.947656
1.875	0.000220537	0.000140132		1.875	0.000175791	0.000140522		1.875	0.000240767	0.000143809		1.875	0.685107	0.680624
1.925	0.000293744	0.000348155		1.925	0.000417712	0.000308273		1.925	0.000436943	0.000491698		1.925	0.453804	0.463051
1.975	0.00116072	0.00115185		1.975	0.00109949	0.000980075		1.975	0.00118568	0.00136443		1.975	0.296696	0.313092
2.025	0.00253388	0.00167904		2.025	0.00193945	0.00179647		2.025	0.00250694	0.0020709		2.025	0.211602	0.20518
2.075	0.00348898	0.00299649		2.075	0.00286603	0.00324706		2.075	0.00448509	0.00401225		2.075	0.146979	0.14296
2.125	0.00606262	0.0048559		2.125	0.0052228	0.00507198		2.125	0.00599073	0.00567674		2.125	0.10362	0.10838
2.175	0.00841085	0.00675399		2.175	0.00735682	0.00712983		2.175	0.00859662	0.00789973		2.175	0.0794334	0.0840527
2.225	0.0105771	0.00874981		2.225	0.00918851	0.00866182		2.225	0.0104952	0.0107258		2.225	0.0649364	0.0682903
2.275	0.0124068	0.010031		2.275	0.011231	0.0101753		2.275	0.0135234	0.0122405		2.275	0.0557723	0.0597697
2.325	0.0153424	0.0130674		2.325	0.01384	0.0128586		2.325	0.0169128	0.0152462		2.325	0.0618953	0.0572801
2.375	0.0173847	0.0151044		2.375	0.0162798	0.0150781		2.375	0.0192275	0.0181679		2.375	0.101528	0.0961667
2.425	0.0197364	0.0162512		2.425	0.0180595	0.0176089		2.425	0.021437	0.0196067		2.425	0.251661	0.250749
2.475	0.0224481	0.0188833		2.475	0.021095	0.0191558		2.475	0.0248526	0.0221512		2.475	0.526393	0.528705
2.525	0.0252905	0.0209562		2.525	0.0233439	0.0209764		2.525	0.027239	0.0246317		2.525	0.898528	0.887966
2.575	0.0286684	0.0223798		2.575	0.0261349	0.0240437		2.575	0.0303262	0.0268332		2.575	1.17937	1.17855
2.625	0.0304144	0.025207		2.625	0.0271998	0.0256367		2.625	0.0327695	0.028863		2.625	1.28125	1.27994
2.675	0.0333625	0.0272289		2.675	0.0304353	0.0274271		2.675	0.0347409	0.0301092		2.675	1.17281	1.17479
2.725	0.0368613	0.030684		2.725	0.0339656	0.0302179		2.725	0.0392112	0.034036		2.725	0.956503	0.969134
2.775	0.0401057	0.0350391		2.775	0.0380028	0.0340234		2.775	0.0438752	0.0377696		2.775	0.759131	0.75847
2.825	0.044975	0.0398384		2.825	0.0408043	0.0379006		2.825	0.0486317	0.0412396		2.825	0.629695	0.64232
2.875	0.0512183	0.0438484		2.875	0.0469703	0.0419902		2.875	0.0546186	0.0476618		2.875	0.580363	0.581736
2.925	0.0578756	0.0517718		2.925	0.0534944	0.0482604		2.925	0.0633866	0.0555498		2.925	0.583523	0.596612
2.975	0.0680545	0.0594207		2.975	0.0625845	0.0567751		2.975	0.0753363	0.0644007		2.975	0.620023	0.629132
3.025	0.0812754	0.0713157		3.025	0.0736262	0.0669554		3.025	0.0877637	0.0765365		3.025	0.635401	0.657251
3.075	0.0955983	0.0886248		3.075	0.0877155	0.0791079		3.075	0.106421	0.0927113		3.075	0.626658	0.636134
3.125	0.114626	0.104463		3.125	0.103063	0.0937113		3.125	0.125923	0.110419		3.125	0.589312	0.606932
3.175	0.135632	0.123159		3.175	0.122268	0.111441		3.175	0.146992	0.131759		3.175	0.531419	0.546452
3.225	0.157702	0.144237		3.225	0.142468	0.132058		3.225	0.173064	0.153726		3.225	0.4799	0.506375
3.275	0.183751	0.171282		3.275	0.164701	0.153035		3.275	0.196915	0.177803		3.275	0.449841	0.475225
3.325	0.20857	0.195708		3.325	0.188966	0.176258		3.325	0.225023	0.204736		3.325	0.423271	0.458199
3.375	0.239919	0.225199		3.375	0.214339	0.197901		3.375	0.253575	0.231181		3.375	0.419773	0.441527
3.425	0.264258	0.25326		3.425	0.2391	0.224016		3.425	0.280938	0.257869		3.425	0.413481	0.439523
3.475	0.295959	0.278065		3.475	0.263962	0.246208		3.475	0.306456	0.280113		3.475	0.424699	0.441876
3.525	0.315443	0.29919		3.525	0.285378	0.267839		3.525	0.33035	0.30326		3.525	0.436586	0.455061
3.575	0.335936	0.318955		3.575	0.300328	0.280696		3.575	0.347176	0.321016		3.575	0.445513	0.460614
3.625	0.348872	0.329981		3.625	0.314533	0.291868		3.625	0.362116	0.330074		3.625	0.471556	0.497038
3.675	0.358879	0.336846		3.675	0.321058	0.298698		3.675	0.368454	0.335268		3.675	0.496174	0.511237
3.725	0.364379	0.340467		3.725	0.32329	0.304997		3.725	0.374699	0.341217		3.725	0.518354	0.52419
3.775	0.361778	0.34263		3.775	0.323521	0.304058		3.775	0.373432	0.339509		3.775	0.532696	0.543882
3.825	0.361175	0.34439		3.825	0.321948	0.302022		3.825	0.374369	0.33875		3.825	0.543079	0.549074
3.875	0.36436	0.344136		3.875	0.324627	0.302088		3.875	0.372774	0.338411		3.875	0.548432	0.55002
3.925	0.367442	0.346507		3.925	0.323894	0.30367		3.925	0.373238	0.340031		3.925	0.549435	0.548888
3.975	0.364616	0.347816		3.975	0.322431	0.301607		3.975	0.373788	0.340075		3.975	0.557376	0.557641
4.025	0.367996	0.346158		4.025	0.324369	0.302763		4.025	0.373692	0.339421		4.025	0.553226	0.556627
4.075	0.36897	0.351614		4.075	0.325197	0.305835		4.075	0.372296	0.340053		4.075	0.558094	0.562103
4.125	0.372319	0.352808		4.125	0.331328	0.310187		4.125	0.37819	0.342894		4.125	0.574645	0.572752
4.175	0.377105	0.354551		4.175	0.333584	0.311633		4.175	0.382846	0.345024		4.175	0.581591	0.585815
4.225	0.378066	0.361165		4.225	0.333719	0.312256		4.225	0.384847	0.34723		4.225	0.589634	0.59363
4.275	0.381665	0.363933		4.275	0.334992	0.317302		4.275	0.384338	0.351459		4.275	0.603289	0.607735
4.325	0.386435	0.363614		4.325	0.340993	0.319471		4.325	0.389559	0.352756		4.325	0.61787	0.609692
4.375	0.388485	0.370142		4.375	0.344449	0.320837		4.375	0.394085	0.357073		4.375	0.621946	0.624706
4.425	0.391245	0.374852		4.425	0.346944	0.324279		4.425	0.397789	0.361389		4.425	0.63397	0.631037
4.475	0.392647	0.376249		4.475	0.349183	0.328064		4.475	0.398726	0.365792		4.475	0.639486	0.640948
4.525	0.398962	0.378092		4.525	0.35502	0.330708		4.525	0.403796	0.366056		4.525	0.646323	0.641297
4.575	0.401093	0.385128		4.575	0.356867	0.336556		4.575	0.405638	0.371896		4.575	0.663389	0.65641
4.625	0.404696	0.386372		4.625	0.360545	0.339054		4.625	0.408629	0.374731		4.625	0.66418	0.658883
4.675	0.408426	0.394802		4.675	0.365314	0.343274		4.675	0.411692	0.378453		4.675	0.66444	0.655019
4.725	0.409908	0.398684		4.725	0.367848	0.347818		4.725	0.417508	0.380635		4.725	0.648072	0.645523
4.775	0.415162	0.398358		4.775	0.371557	0.350851		4.775	0.420822	0.38534		4.775	0.631539	0.626566
4.825	0.41806	0.403921		4.825	0.373823	0.352919		4.825	0.421556	0.385478		4.825	0.608582	0.607803
4.875	0.420999	0.404173		4.875	0.377811	0.356244		4.875	0.425041	0.387903		4.875	0.596167	0.588902
4.925	0.423379	0.405812		4.925	0.379237	0.358553		4.925	0.427015	0.390286		4.925	0.575949	0.5768
4.975	0.421696	0.407862		4.975	0.380427	0.359135		4.975	0.425745	0.39113		4.975	0.573932	0.562037
5.025	0.424075	0.405587		5.025	0.382931	0.359371		5.025	0.427849	0.389961		5.025	0.564501	0.558149
5.075	0.422586	0.405501		5.075	0.380776	0.359899		5.075	0.425908	0.389251		5.075	0.561988	0.55497
5.125	0.418927	0.40374		5.125	0.378279	0.357826		5.125	0.423694	0.387348		5.125	0.557891	0.545822
5.175	0.420144	0.400473		5.175	0.377092	0.355626		5.175	0.421279	0.384557		5.175	0.552688	0.540757
5.225	0.417249	0.401501		5.225	0.376952	0.356868		5.225	0.422897	0.386895		5.225	0.543721	0.542939
5.275	0.419495	0.400513		5.275	0.376539	0.355161		5.275	0.420207	0.38441		5.275	0.530626	0.528595
5.325	0.419315	0.401945		5.325	0.376781	0.356285		5.325	0.421349	0.385157		5.325	0.526113	0.524973
5.375	0.418783	0.401878		5.375	0.377407	0.356488		5.375	0.420605	0.384752		5.375	0.52848	0.521198
5.425	0.421782	0.405614		5.425	0.37899	0.359416		5.425	0.423373	0.387537		5.425	0.520783	0.521321
5.475	0.421752	0.403488		5.475	0.381803	0.35988		5.475	0.425314	0.388942		5.475	0.520891	0.517591
5.525	0.425498	0.409485		5.525	0.384157	0.362342		5.525	0.427198	0.390593		5.525	0.518018	0.518008
5.575	0.428851	0.414496		5.575	0.386734	0.367158		5.575	0.432074	0.395382		5.575	0.522811	0.514879
5.625	0.431389	0.418364		5.625	0.391408	0.369873		5.625	0.435694	0.398395		5.625	0.521746	0.51702
5.675	0.436493	0.42131		5.675	0.396188	0.373741		5.675	0.4417	0.405095		5.675	0.524297	0.521002
5.725	0.443715	0.430181		5.725	0.402644	0.380274		5.725	0.44559	0.409163		5.725	0.530928	0.523143
5.775	0.446399	0.435814		5.775	0.407736	0.384045		5.775	0.450473	0.41497		5.775	0.53603	0.523795
5.825	0.453595	0.443523		5.825	0.41251	0.390931		5.825	0.456409	0.420664		5.825	0.5386	0.529958
5.875	0.459609	0.447706		5.875	0.418775	0.396163		5.875	0.462388	0.426558		5.875	0.541751	0.535248
5.925	0.464264	0.453266		5.925	0.423719	0.401135		5.925	0.468235	0.430339		5.925	0.544483	0.53258
5.975	0.469256	0.456613		5.975	0.428083	0.403605		5.975	0.472063	0.432925		5.975	0.548181	0.534201
6.025	0.471706	0.458289		6.025	0.429848	0.406124		6.025	0.474114	0.435046		6.025	0.547839	0.540841
6.075	0.476772	0.462753		6.075	0.4331	0.408439		6.075	0.476992	0.437854		6.075	0.555442	0.543186
6.125	0.477369	0.464815		6.125	0.432923	0.410143		6.125	0.477784	0.438724		6.125	0.558271	0.546368
6.175	0.480904	0.466832		6.175	0.434731	0.409944		6.175	0.47905	0.43913		6.175	0.556873	0.543411
6.225	0.481412	0.470161		6.225	0.436081	0.412114		6.225	0.479196	0.441085		6.225	0.565756	0.546731
6.275	0.483204	0.471952		6.275	0.437851	0.414132		6.275	0.481038	0.441242		6.275	0.559853	0.544582
6.325	0.483381	0.471422		6.325	0.439265	0.412561		6.325	0.481706	0.440045		6.325	0.56473	0.548623
6.375	0.484449	0.475516		6.375	0.43703	0.415682		6.375	0.483245	0.443004		6.375	0.568617	0.548381
6.425	0.4882	0.474776		6.425	0.440704	0.414535		6.425	0.482069	0.442591		6.425	0.572718	0.551405
6.475	0.48746	0.47827		6.475	0.442123	0.416399		6.475	0.485088	0.443706		6.475	0.578667	0.551252
6.525	0.492533	0.478023		6.525	0.442999	0.417004		6.525	0.484489	0.445005		6.525	0.573307	0.549767
6.575	0.495434	0.478967		6.575	0.444352	0.417879		6.575	0.485324	0.445205		6.575	0.577585	0.554877
6.625	0.496202	0.481984		6.625	0.445253	0.418795		6.625	0.487023	0.447329		6.625	0.580364	0.553577
6.675	0.499385	0.484248		6.675	0.447434	0.420395		6.675	0.487858	0.447737		6.675	0.577686	0.551663
6.725	0.498109	0.483756		6.725	0.448323	0.421196		6.725	0.488085	0.449332		6.725	0.579746	0.550105
6.775	0.501756	0.486405		6.775	0.449258	0.421932		6.775	0.490426	0.449616		6.775	0.576793	0.550294
6.825	0.503827	0.488894		6.825	0.451285	0.423028		6.825	0.490205	0.450344		6.825	0.584638	0.551363
6.875	0.504784	0.48792		6.875	0.452046	0.424476		6.875	0.491063	0.451093		6.875	0.582283	0.551472
6.925	0.507405	0.493658		6.925	0.453445	0.427331		6.925	0.491512	0.45311		6.925	0.581455	0.549564
6.975	0.509937	0.495543		6.975	0.456609	0.428604		6.975	0.494234	0.454331		6.975	0.578485	0.551522
7.025	0.513878	0.49763		7.025	0.4596	0.429487		7.025	0.497838	0.45768		7.025	0.578436	0.549453
7.075	0.515355	0.500578		7.075	0.46112	0.432567		7.075	0.497813	0.458182		7.075	0.579963	0.544067
7.125	0.516112	0.502936		7.125	0.462932	0.434199		7.125	0.50033	0.46022		7.125	0.573836	0.539529
7.175	0.521471	0.505502		7.175	0.465865	0.437284		7.175	0.502979	0.462101		7.175	0.571156	0.543886
7.225	0.523714	0.508584		7.225	0.468732	0.438952		7.225	0.503986	0.463993		7.225	0.573306	0.539232
7.275	0.52691	0.509609		7.275	0.471856	0.441126		7.275	0.508136	0.467099		7.275	0.567017	0.539547
7.325	0.530563	0.512781		7.325	0.474759	0.444528		7.325	0.509918	0.470208		7.325	0.570275	0.534836
7.375	0.532662	0.517184		7.375	0.477673	0.446979		7.375	0.512679	0.472641		7.375	0.571469	0.536761
7.425	0.53454	0.520998		7.425	0.481643	0.449079		7.425	0.5135	0.474488		7.425	0.569652	0.532425
7.475	0.538656	0.521123		7.475	0.483748	0.452964		7.475	0.517452	0.47771		7.475	0.566975	0.529874
7.525	0.540583	0.522482		7.525	0.486122	0.453532		7.525	0.518079	0.478293		7.525	0.567589	0.530329
7.575	0.542459	0.526727		7.575	0.487935	0.456562		7.575	0.519921	0.481255		7.575	0.567383	0.53223
7.625	0.545418	0.527771		7.625	0.491301	0.457928		7.625	0.522793	0.482524		7.625	0.563959	0.531071
7.675	0.547773	0.530704		7.675	0.493209	0.461206		7.675	0.524289	0.484604		7.675	0.56422	0.531278
7.725	0.550623	0.531083		7.725	0.49598	0.462456		7.725	0.526902	0.486985		7.725	0.566735	0.529959
7.775	0.552584	0.533225		7.775	0.498479	0.464719		7.775	0.527526	0.489707		7.775	0.566789	0.525802
7.825	0.552815	0.535206		7.825	0.499794	0.46619		7.825	0.530044	0.490526		7.825	0.563158	0.528408
7.875	0.555611	0.53882		7.875	0.502974	0.46787		7.875	0.530291	0.492867		7.875	0.565535	0.530532
7.925	0.558201	0.53759		7.925	0.504738	0.47086		7.925	0.532924	0.495125		7.925	0.565615	0.527822
7.975	0.560275	0.54045		7.975	0.507577	0.472388		7.975	0.536054	0.497373		7.975	0.567835	0.529132
8.025	0.561263	0.543742		8.025	0.510152	0.476205		8.025	0.536245	0.499779		8.025	0.568502	0.530717
8.075	0.561626	0.544397		8.075	0.511652	0.476369		8.075	0.539266	0.501883		8.075	0.572191	0.53086
8.125	0.562916	0.544		8.125	0.512729	0.478035		8.125	0.540849	0.50146		8.125	0.573725	0.534734
8.175	0.565675	0.544688		8.175	0.514693	0.479822		8.175	0.54291	0.503698		8.175	0.572181	0.534615
8.225	0.566292	0.548761		8.225	0.517709	0.481741		8.225	0.544395	0.506268		8.225	0.576025	0.5351
8.275	0.570705	0.549373		8.275	0.518036	0.483391		8.275	0.544994	0.508736		8.275	0.57882	0.536578
8.325	0.570654	0.55005		8.325	0.520981	0.48495		8.325	0.545423	0.509273		8.325	0.578415	0.53668
8.375	0.571257	0.553604		8.375	0.522875	0.487367		8.375	0.547338	0.510702		8.375	0.578881	0.540866
8.425	0.573862	0.552072		8.425	0.525279	0.487447		8.425	0.549521	0.511259		8.425	0.585114	0.540659
8.475	0.574153	0.554707		8.475	0.525903	0.489909		8.475	0.549294	0.513643		8.475	0.584256	0.541592
8.525	0.575769	0.556508		8.525	0.527518	0.491458		8.525	0.55151	0.51462		8.525	0.583175	0.545064
8.575	0.577112	0.556876		8.575	0.529411	0.493303		8.575	0.552189	0.515452		8.575	0.586914	0.545078
8.625	0.577827	0.558212		8.625	0.531192	0.495231		8.625	0.553609	0.516818		8.625	0.592329	0.545958
8.675	0.58038	0.559199		8.675	0.53218	0.496365		8.675	0.553706	0.516199		8.675	0.592574	0.548846
8.725	0.579822	0.559483		8.725	0.533828	0.497497		8.725	0.555553	0.517464		8.725	0.594545	0.551007
8.775	0.581125	0.561388		8.775	0.535098	0.49988		8.775	0.556021	0.519303		8.775	0.596914	0.549245
8.825	0.582138	0.561241		8.825	0.53616	0.500846		8.825	0.556013	0.519711		8.825	0.599471	0.549495
8.875	0.584167	0.56096		8.875	0.538567	0.502426		8.875	0.557701	0.519853		8.875	0.597197	0.552709
8.925	0.585898	0.562229		8.925	0.540572	0.503623		8.925	0.559845	0.52218		8.925	0.599941	0.55594
8.975	0.585655	0.563335		8.975	0.54115	0.504644		8.975	0.560813	0.521193		8.975	0.59963	0.554202
9.025	0.586127	0.564511		9.025	0.542871	0.506332		9.025	0.560794	0.522779		9.025	0.602532	0.554694
9.075	0.587741	0.566684		9.075	0.543685	0.506376		9.075	0.560621	0.523049		9.075	0.602785	0.557616
9.125	0.589404	0.567265		9.125	0.545369	0.509007		9.125	0.560645	0.525833		9.125	0.601794	0.555783
9.175	0.588735	0.569709		9.175	0.547005	0.510489		9.175	0.563702	0.526465		9.175	0.604094	0.554373
9.225	0.592717	0.570059		9.225	0.549246	0.510444		9.225	0.565758	0.525864		9.225	0.603538	0.559928
9.275	0.592095	0.569392		9.275	0.549526	0.511619		9.275	0.565191	0.528315		9.275	0.602935	0.557685
9.325	0.593929	0.570331		9.325	0.550972	0.513424		9.325	0.566123	0.527797		9.325	0.60322	0.560086
9.375	0.595541	0.573116		9.375	0.55204	0.515345		9.375	0.567521	0.529392		9.375	0.606561	0.561369
9.425	0.597095	0.572865		9.425	0.554361	0.516514		9.425	0.569916	0.530478		9.425	0.606933	0.563037
9.475	0.597322	0.574716		9.475	0.554985	0.518473		9.475	0.569193	0.532127		9.475	0.604911	0.563254
9.525	0.5987	0.575677		9.525	0.55562	0.519609		9.525	0.570264	0.534164		9.525	0.608448	0.561909
9.575	0.598335	0.576493		9.575	0.55874	0.521651		9.575	0.573212	0.533377		9.575	0.608459	0.560316
9.625	0.601634	0.578722		9.625	0.559923	0.522965		9.625	0.574399	0.536218		9.625	0.608954	0.561096
9.675	0.601821	0.577904		9.675	0.561885	0.523488		9.675	0.575504	0.537951		9.675	0.610245	0.560225
9.725	0.604052	0.579006		9.725	0.563272	0.525292		9.725	0.576778	0.537005		9.725	0.612142	0.56167
9.775	0.606035	0.582683		9.775	0.56584	0.526913		9.775	0.579338	0.540532		9.775	0.61518	0.566422
9.825	0.607763	0.583323		9.825	0.567035	0.52852		9.825	0.580466	0.541432		9.825	0.616012	0.564193
9.875	0.606299	0.585334		9.875	0.567692	0.530311		9.875	0.580782	0.542586		9.875	0.61804	0.566097
9.925	0.609718	0.586334		9.925	0.569996	0.530663		9.925	0.582732	0.544755		9.925	0.616052	0.565681
9.975	0.610479	0.589979		9.975	0.5721	0.533883		9.975	0.584339	0.545577		9.975	0.616562	0.568056
10.025	0.612395	0.589278		10.025	0.574568	0.53429		10.025	0.586842	0.546917		10.025	0.616071	0.569328
10.075	0.615128	0.592585		10.075	0.577058	0.537056		10.075	0.588505	0.549393		10.075	0.616155	0.567445
10.125	0.616266	0.592146		10.125	0.578252	0.539148		10.125	0.589793	0.550285		10.125	0.620011	0.565046
10.175	0.617992	0.594386		10.175	0.58051	0.539758		10.175	0.591541	0.552825		10.175	0.620028	0.568391
10.225	0.619278	0.596099		10.225	0.581828	0.541123		10.225	0.59347	0.553745		10.225	0.622456	0.567638
10.275	0.619833	0.596544		10.275	0.582377	0.543425		10.275	0.594379	0.555729		10.275	0.623197	0.571687
10.325	0.621452	0.599367		10.325	0.584793	0.544131		10.325	0.595614	0.557272		10.325	0.624464	0.568493
10.375	0.622546	0.600903		10.375	0.587066	0.545629		10.375	0.59785	0.5576		10.375	0.626132	0.569574
10.425	0.624744	0.602077		10.425	0.589253	0.546959		10.425	0.599286	0.559779		10.425	0.625121	0.569706
10.475	0.626855	0.602705		10.475	0.590354	0.548408		10.475	0.600295	0.561054		10.475	0.628102	0.569458
10.525	0.627632	0.604765		10.525	0.590841	0.550176		10.525	0.601848	0.562015		10.525	0.627574	0.570683
10.575	0.628899	0.60634		10.575	0.593057	0.551228		10.575	0.602798	0.564728		10.575	0.6275	0.573303
10.625	0.629756	0.608153		10.625	0.594052	0.553382		10.625	0.605097	0.564915		10.625	0.630015	0.573587
10.675	0.63283	0.609474		10.675	0.596616	0.554567		10.675	0.607034	0.566443		10.675	0.632303	0.575162
10.725	0.634132	0.609954		10.725	0.597977	0.555677		10.725	0.607576	0.568236		10.725	0.629936	0.575793
10.775	0.633875	0.611614		10.775	0.599675	0.557712		10.775	0.610376	0.569801		10.775	0.629456	0.574425
10.825	0.635521	0.613138		10.825	0.600895	0.558547		10.825	0.610868	0.569906		10.825	0.632018	0.576811
10.875	0.63715	0.613677		10.875	0.602621	0.560348		10.875	0.61211	0.571986		10.875	0.631512	0.574461
10.925	0.638665	0.615707		10.925	0.603574	0.561733		10.925	0.613893	0.574066		10.925	0.634343	0.575618
10.975	0.641511	0.615597		10.975	0.606084	0.562655		10.975	0.615866	0.574149		10.975	0.634349	0.577211
11.025	0.641714	0.616652		11.025	0.607009	0.564076		11.025	0.616917	0.576547		11.025	0.63909	0.581655
11.075	0.642459	0.617142		11.075	0.6081	0.564519		11.075	0.617483	0.576914		11.075	0.639657	0.580985
11.125	0.644202	0.619863		11.125	0.609543	0.566569		11.125	0.620539	0.578556		11.125	0.638324	0.578935
11.175	0.646612	0.620897		11.175	0.611202	0.568423		11.175	0.620611	0.579599		11.175	0.638321	0.581013
11.225	0.647183	0.621711		11.225	0.612352	0.569435		11.225	0.622364	0.581334		11.225	0.640737	0.578379
11.275	0.646845	0.622239		11.275	0.613133	0.569723		11.275	0.622811	0.581889		11.275	0.637914	0.582322
11.325	0.64877	0.624091		11.325	0.615592	0.572231		11.325	0.625597	0.584065		11.325	0.641067	0.583438
11.375	0.650893	0.62499		11.375	0.61624	0.573513		11.375	0.626271	0.583556		11.375	0.639624	0.581927
11.425	0.652269	0.626885		11.425	0.617699	0.574553		11.425	0.628627	0.584908		11.425	0.642702	0.583162
11.475	0.653374	0.627282		11.475	0.619143	0.57599		11.475	0.629886	0.586242		11.475	0.643971	0.584533
11.525	0.654039	0.62872		11.525	0.6204	0.57766		11.525	0.630646	0.588273		11.525	0.643988	0.58682
11.575	0.65532	0.628918		11.575	0.621482	0.578015		11.575	0.631156	0.588249		11.575	0.644642	0.58827
11.625	0.6551	0.629812		11.625	0.62279	0.579764		11.625	0.632715	0.590685		11.625	0.647047	0.587771
11.675	0.659388	0.631151		11.675	0.624367	0.581486		11.675	0.633896	0.590836		11.675	0.647838	0.587251
11.725	0.658572	0.632256		11.725	0.625794	0.581307		11.725	0.635683	0.591498		11.725	0.648153	0.586873
11.775	0.661366	0.633287		11.775	0.626689	0.583274		11.775	0.637506	0.59207		11.775	0.647359	0.588573
11.825	0.661845	0.634464		11.825	0.628319	0.584012		11.825	0.638466	0.593919		11.825	0.649819	0.590986
11.875	0.662416	0.635586		11.875	0.62904	0.585172		11.875	0.639102	0.594679		11.875	0.650816	0.590896
11.925	0.664274	0.636324		11.925	0.631494	0.586954		11.925	0.640021	0.596441		11.925	0.652394	0.589916
11.975	0.664827	0.637562		11.975	0.632117	0.587583		11.975	0.64139	0.59657		11.975	0.654076	0.592473
12.025	0.665346	0.638386		12.025	0.633655	0.588309		12.025	0.642881	0.598242		12.025	0.653638	0.592875
12.075	0.666573	0.639439		12.075	0.634559	0.589692		12.075	0.645065	0.598752		12.075	0.655326	0.59448
12.125	0.668783	0.639978		12.125	0.636377	0.590627		12.125	0.64496	0.599304		12.125	0.656073	0.593179
12.175	0.670196	0.641198		12.175	0.637635	0.592793		12.175	0.64702	0.600998		12.175	0.659473	0.594444
12.225	0.67067	0.641056		12.225	0.637803	0.593848		12.225	0.64792	0.600479		12.225	0.660316	0.593976
12.275	0.672031	0.64191		12.275	0.639161	0.595321		12.275	0.64808	0.602375		12.275	0.662387	0.597042
12.325	0.672407	0.643213		12.325	0.64041	0.596149		12.325	0.649512	0.603128		12.325	0.662496	0.59933
12.375	0.673749	0.644739		12.375	0.641097	0.596811		12.375	0.651159	0.604121		12.375	0.664141	0.601798
12.425	0.675158	0.645105		12.425	0.643826	0.597454		12.425	0.652055	0.605673		12.425	0.664836	0.601321
12.475	0.676608	0.64575		12.475	0.644348	0.598711		12.475	0.652842	0.606256		12.475	0.664899	0.602314
12.525	0.67754	0.644925		12.525	0.646218	0.599333		12.525	0.654534	0.606534		12.525	0.667038	0.603399
12.575	0.678152	0.646521		12.575	0.646761	0.600967		12.575	0.655223	0.607378		12.575	0.66784	0.604862
12.625	0.679126	0.648966		12.625	0.649055	0.601839		12.625	0.657354	0.608914		12.625	0.668049	0.603856
12.675	0.679952	0.648778		12.675	0.649614	0.603137		12.675	0.656804	0.609423		12.675	0.669529	0.604662
12.725	0.681459	0.649311		12.725	0.651239	0.604131		12.725	0.659276	0.610381		12.725	0.669737	0.607097
12.775	0.682804	0.650629		12.775	0.65278	0.604701		12.775	0.659508	0.610935		12.775	0.669775	0.608503
12.825	0.68415	0.652808		12.825	0.65286	0.60602		12.825	0.660707	0.611911		12.825	0.673348	0.60856
12.875	0.684774	0.652561		12.875	0.654442	0.606615		12.875	0.662071	0.612648		12.875	0.673042	0.61081
12.925	0.685713	0.652893		12.925	0.654265	0.608707		12.925	0.662079	0.613802		12.925	0.674122	0.609508
12.975	0.686022	0.65422		12.975	0.656825	0.60912		12.975	0.663825	0.614456		12.975	0.673825	0.61086
13.025	0.687095	0.654535		13.025	0.658083	0.610082		13.025	0.664707	0.615072		13.025	0.676688	0.612987
13.075	0.688591	0.655887		13.075	0.65926	0.610964		13.075	0.666354	0.61532		13.075	0.678321	0.611802
13.125	0.689234	0.655617		13.125	0.660015	0.61201		13.125	0.666523	0.615861		13.125	0.677552	0.613263
13.175	0.689822	0.657117		13.175	0.661283	0.613491		13.175	0.667238	0.61798		13.175	0.678617	0.613203
13.225	0.691841	0.658659		13.225	0.661889	0.614645		13.225	0.670002	0.618533		13.225	0.677379	0.615825
13.275	0.692556	0.659026		13.275	0.663302	0.615447		13.275	0.670175	0.619424		13.275	0.677662	0.615335
13.325	0.694008	0.659688		13.325	0.664607	0.616951		13.325	0.672179	0.620826		13.325	0.678855	0.616705
13.375	0.694861	0.659703		13.375	0.665072	0.618794		13.375	0.671557	0.62244		13.375	0.680205	0.61574
13.425	0.696885	0.660584		13.425	0.666256	0.618893		13.425	0.672824	0.622089		13.425	0.683917	0.617395
13.475	0.696443	0.661914		13.475	0.666721	0.620314		13.475	0.673524	0.623077		13.475	0.682981	0.618003
13.525	0.697866	0.662264		13.525	0.669359	0.621272		13.525	0.674536	0.624024		13.525	0.685286	0.617862
13.575	0.699101	0.664492		13.575	0.669381	0.622772		13.575	0.675031	0.624888		13.575	0.684298	0.618385
13.625	0.700418	0.662447		13.625	0.669891	0.623472		13.625	0.676494	0.625907		13.625	0.685783	0.619646
13.675	0.702198	0.664354		13.675	0.672364	0.624308		13.675	0.6795	0.626515		13.675	0.688792	0.622688
13.725	0.702464	0.66531		13.725	0.67264	0.625419		13.725	0.679472	0.626683		13.725	0.687621	0.625538
13.775	0.703911	0.666508		13.775	0.674021	0.627176		13.775	0.680088	0.628093		13.775	0.6899	0.624092
13.825	0.705141	0.667547		13.825	0.675904	0.628962		13.825	0.681362	0.629839		13.825	0.690822	0.623899
13.875	0.705599	0.667531		13.875	0.67703	0.629017		13.875	0.682305	0.629092		13.875	0.690154	0.624207
13.925	0.706558	0.668815		13.925	0.678318	0.630588		13.925	0.68253	0.630547		13.925	0.688466	0.625715
13.975	0.707802	0.669598		13.975	0.678358	0.632451		13.975	0.684297	0.632649		13.975	0.693861	0.627899
14.025	0.708466	0.671955		14.025	0.679717	0.632787		14.025	0.684953	0.632541		14.025	0.689947	0.627236
14.075	0.710708	0.671664		14.075	0.681146	0.634224		14.075	0.686517	0.634252		14.075	0.693491	0.629393
14.125	0.711056	0.672611		14.125	0.681866	0.634968		14.125	0.687562	0.633969		14.125	0.694065	0.630454
14.175	0.712318	0.673914		14.175	0.683225	0.636421		14.175	0.688586	0.636201		14.175	0.695863	0.630093
14.225	0.714431	0.674524		14.225	0.684615	0.637454		14.225	0.690244	0.636291		14.225	0.695017	0.631478
14.275	0.715302	0.674636		14.275	0.686404	0.638956		14.275	0.691348	0.637601		14.275	0.694939	0.631098
14.325	0.715652	0.675414		14.325	0.687278	0.640137		14.325	0.692823	0.638416		14.325	0.697078	0.631568
14.375	0.716573	0.677149		14.375	0.687716	0.641247		14.375	0.692985	0.639433		14.375	0.701125	0.633639
14.425	0.718257	0.677218		14.425	0.689603	0.642532		14.425	0.694611	0.639641		14.425	0.696686	0.634431
14.475	0.719209	0.678918		14.475	0.689979	0.643978		14.475	0.695141	0.64139		14.475	0.700057	0.636721
14.525	0.720336	0.678632		14.525	0.691084	0.644521		14.525	0.696196	0.641698		14.525	0.699018	0.63778
14.575	0.721537	0.680943		14.575	0.692076	0.645866		14.575	0.6975	0.642776		14.575	0.70145	0.636398
14.625	0.722205	0.681176		14.625	0.692845	0.646749		14.625	0.698395	0.642874		14.625	0.702828	0.63668
14.675	0.723945	0.681899		14.675	0.693933	0.647966		14.675	0.699544	0.64388		14.675	0.701508	0.637416
14.725	0.724624	0.682701		14.725	0.694797	0.649614		14.725	0.700581	0.64571		14.725	0.703988	0.638385
14.775	0.724363	0.683288		14.775	0.695544	0.650046		14.775	0.700606	0.645874		14.775	0.706298	0.63769
14.825	0.725687	0.683446		14.825	0.697276	0.651096		14.825	0.70212	0.64737		14.825	0.706133	0.639819
14.875	0.726647	0.684568		14.875	0.698079	0.652294		14.875	0.702479	0.648304		14.875	0.704928	0.643272
14.925	0.727118	0.684851		14.925	0.699117	0.653372		14.925	0.704541	0.649107		14.925	0.708655	0.641356
14.975	0.728112	0.686058		14.975	0.699539	0.6546		14.975	0.705329	0.650587		14.975	0.710086	0.644182
15.025	0.729191	0.68728		15.025	0.701898	0.655607		15.025	0.705496	0.65088		15.025	0.708233	0.643891
15.075	0.730153	0.688656		15.075	0.702361	0.657007		15.075	0.706855	0.651518		15.075	0.709903	0.645825
15.125	0.731756	0.688551		15.125	0.702752	0.657964		15.125	0.707225	0.652839		15.125	0.710995	0.644731
15.175	0.731727	0.689123		15.175	0.703841	0.658183		15.175	0.708698	0.653062		15.175	0.711242	0.645834
15.225	0.73306	0.69032		15.225	0.704814	0.65994		15.225	0.708667	0.654592		15.225	0.712455	0.647387
15.275	0.733598	0.692038		15.275	0.706451	0.660821		15.275	0.71039	0.655799		15.275	0.713887	0.64695
15.325	0.734166	0.692113		15.325	0.706882	0.661956		15.325	0.711108	0.655916		15.325	0.714158	0.65049
15.375	0.736016	0.692511		15.375	0.707442	0.663483		15.375	0.712486	0.656832		15.375	0.715003	0.649327
15.425	0.73587	0.693027		15.425	0.70897	0.664396		15.425	0.712544	0.657935		15.425	0.71646	0.649833
15.475	0.73758	0.694009		15.475	0.709417	0.664785		15.475	0.71365	0.658275		15.475	0.7186	0.649541
15.525	0.737651	0.694966		15.525	0.710753	0.665811		15.525	0.714637	0.659548		15.525	0.719498	0.649954
15.575	0.738567	0.694882		15.575	0.71193	0.666651		15.575	0.715666	0.660214		15.575	0.719711	0.651948
15.625	0.74008	0.696895		15.625	0.712188	0.667394		15.625	0.71612	0.660751		15.625	0.71902	0.652743
15.675	0.740759	0.696893		15.675	0.713298	0.6688		15.675	0.717118	0.662119		15.675	0.719418	0.654511
15.725	0.74172	0.6981		15.725	0.714649	0.669608		15.725	0.717628	0.663043		15.725	0.719433	0.654725
15.775	0.74229	0.698832		15.775	0.715241	0.670994		15.775	0.717807	0.664015		15.775	0.721318	0.656567
15.825	0.743293	0.699683		15.825	0.715974	0.672123		15.825	0.719304	0.664323		15.825	0.723619	0.655727
15.875	0.745297	0.699596		15.875	0.717107	0.672665		15.875	0.721739	0.66541		15.875	0.722988	0.654807
15.925	0.745322	0.700885		15.925	0.717143	0.674091		15.925	0.720906	0.666348		15.925	0.724067	0.658194
15.975	0.746765	0.700126		15.975	0.718121	0.674857		15.975	0.72137	0.667435		15.975	0.726243	0.658067
16.025	0.746988	0.702033		16.025	0.719315	0.676053		16.025	0.722334	0.66726		16.025	0.726555	0.657713
16.075	0.748339	0.702192		16.075	0.7212	0.67721		16.075	0.723533	0.668993		16.075	0.727917	0.65804
16.125	0.748713	0.702771		16.125	0.721772	0.676673		16.125	0.724724	0.669013		16.125	0.728021	0.660466
16.175	0.749288	0.7044		16.175	0.722491	0.678265		16.175	0.725432	0.66959		16.175	0.729019	0.660393
16.225	0.74997	0.704402		16.225	0.723028	0.679275		16.225	0.725613	0.67162		16.225	0.728981	0.662235
16.275	0.751215	0.704856		16.275	0.724249	0.680152		16.275	0.726802	0.671918		16.275	0.729962	0.662332
16.325	0.751353	0.705899		16.325	0.724523	0.681145		16.325	0.727539	0.67249		16.325	0.73034	0.663865
16.375	0.752327	0.706485		16.375	0.725964	0.681813		16.375	0.728495	0.673112		16.375	0.731448	0.662415
16.425	0.752994	0.707503		16.425	0.726474	0.683026		16.425	0.729445	0.673925		16.425	0.73403	0.663509
16.475	0.753934	0.707083		16.475	0.727447	0.683395		16.475	0.730242	0.674968		16.475	0.733371	0.663817
16.525	0.754799	0.70839		16.525	0.727815	0.684545		16.525	0.730531	0.675273		16.525	0.735752	0.666041
16.575	0.755962	0.70858		16.575	0.729199	0.68562		16.575	0.731496	0.675976		16.575	0.73486	0.66613
16.625	0.756753	0.709104		16.625	0.730288	0.68643		16.625	0.731943	0.676523		16.625	0.734867	0.667308
16.675	0.758095	0.710137		16.675	0.731206	0.687217		16.675	0.733476	0.67774		16.675	0.737896	0.668099
16.725	0.757535	0.710993		16.725	0.731356	0.689031		16.725	0.734005	0.678514		16.725	0.736777	0.669182
16.775	0.759015	0.711211		16.775	0.732928	0.689261		16.775	0.735283	0.67927		16.775	0.736991	0.667995
16.825	0.759247	0.712759		16.825	0.733155	0.690506		16.825	0.735574	0.680152		16.825	0.739628	0.668989
16.875	0.760074	0.712659		16.875	0.734189	0.691193		16.875	0.737062	0.680707		16.875	0.740776	0.669625
16.925	0.759774	0.713048		16.925	0.734872	0.692748		16.925	0.738138	0.681455		16.925	0.739418	0.672796
16.975	0.761169	0.714699		16.975	0.735811	0.693178		16.975	0.738619	0.681889		16.975	0.742251	0.670439
17.025	0.76231	0.714224		17.025	0.736216	0.693467		17.025	0.739355	0.682863		17.025	0.741591	0.671032
17.075	0.762644	0.715687		17.075	0.737391	0.69465		17.075	0.739807	0.683728		17.075	0.741716	0.673572
17.125	0.762984	0.715966		17.125	0.737987	0.695634		17.125	0.741131	0.684361		17.125	0.743466	0.673912
17.175	0.764249	0.716488		17.175	0.738204	0.696791		17.175	0.742448	0.685748		17.175	0.74468	0.676036
17.225	0.765268	0.717739		17.225	0.739488	0.696959		17.225	0.742722	0.685247		17.225	0.744788	0.67463
17.275	0.766105	0.717944		17.275	0.740255	0.697761		17.275	0.743248	0.686486		17.275	0.746201	0.675096
17.325	0.766084	0.717966		17.325	0.741461	0.698867		17.325	0.744748	0.686737		17.325	0.745899	0.675703
17.375	0.766887	0.719253		17.375	0.741911	0.699519		17.375	0.745567	0.687677		17.375	0.748263	0.677719
17.425	0.76707	0.719866		17.425	0.742472	0.700495		17.425	0.746479	0.688813		17.425	0.749134	0.677075
17.475	0.768554	0.71992		17.475	0.743301	0.701312		17.475	0.746974	0.690059		17.475	0.750563	0.679475
17.525	0.770024	0.720779		17.525	0.744529	0.701902		17.525	0.747974	0.690185		17.525	0.749957	0.678808
17.575	0.770848	0.720822		17.575	0.745283	0.702118		17.575	0.74822	0.690881		17.575	0.751208	0.680228
17.625	0.771666	0.72252		17.625	0.746558	0.703889		17.625	0.749831	0.691686		17.625	0.751755	0.680709
17.675	0.7717	0.722104		17.675	0.746879	0.704672		17.675	0.750812	0.692018		17.675	0.751741	0.681642
17.725	0.77283	0.7232		17.725	0.747834	0.70524		17.725	0.751107	0.692185		17.725	0.753471	0.680576
17.775	0.772073	0.72372		17.775	0.747748	0.706122		17.775	0.751797	0.693829		17.775	0.753513	0.682038
17.825	0.772799	0.724728		17.825	0.748632	0.707137		17.825	0.75268	0.694343		17.825	0.754038	0.683171
17.875	0.773789	0.724785		17.875	0.74987	0.707075		17.875	0.753439	0.695263		17.875	0.755545	0.684248
17.925	0.774452	0.725619		17.925	0.75083	0.708599		17.925	0.75374	0.695781		17.925	0.755828	0.68484
17.975	0.775885	0.726422		17.975	0.751567	0.7091		17.975	0.755401	0.696536		17.975	0.756591	0.685108
18.025	0.775883	0.726726		18.025	0.752276	0.709852		18.025	0.75536	0.696773		18.025	0.756566	0.687088
18.075	0.777114	0.727706		18.075	0.753051	0.710995		18.075	0.756125	0.698192		18.075	0.757748	0.686227
18.125	0.777626	0.727975		18.125	0.753605	0.711588		18.125	0.757515	0.699063		18.125	0.758935	0.686856
18.175	0.777976	0.728385		18.175	0.754396	0.712614		18.175	0.758101	0.699874		18.175	0.759927	0.688779
18.225	0.779453	0.728541		18.225	0.755453	0.71273		18.225	0.759132	0.700922		18.225	0.760996	0.687342
18.275	0.779446	0.730689		18.275	0.755596	0.713737		18.275	0.759454	0.701356		18.275	0.761331	0.689567
18.325	0.780172	0.730589		18.325	0.756554	0.71464		18.325	0.760306	0.702287		18.325	0.760133	0.687752
18.375	0.780572	0.732339		18.375	0.757297	0.715492		18.375	0.761034	0.703005		18.375	0.764085	0.689424
18.425	0.781305	0.732068		18.425	0.757869	0.715408		18.425	0.761914	0.703434		18.425	0.763213	0.690501
18.475	0.78183	0.733376		18.475	0.758721	0.716853		18.475	0.762448	0.704898		18.475	0.763145	0.691912
18.525	0.782445	0.733166		18.525	0.75944	0.717638		18.525	0.763384	0.704701		18.525	0.76337	0.692756
18.575	0.783156	0.734128		18.575	0.760169	0.718848		18.575	0.763896	0.705578		18.575	0.764204	0.692949
18.625	0.783853	0.734263		18.625	0.761826	0.71929		18.625	0.76554	0.706364		18.625	0.766854	0.692943
18.675	0.784498	0.735082		18.675	0.762156	0.719791		18.675	0.765449	0.70671		18.675	0.767631	0.69494
18.725	0.785259	0.736228		18.725	0.76276	0.720716		18.725	0.766505	0.708284		18.725	0.767118	0.693731
18.775	0.786233	0.736743		18.775	0.76337	0.721325		18.775	0.766973	0.708126		18.775	0.76831	0.694478
18.825	0.787044	0.737272		18.825	0.764344	0.72215		18.825	0.767782	0.709339		18.825	0.770297	0.695394
18.875	0.787098	0.736893		18.875	0.764856	0.7223		18.875	0.768395	0.709587		18.875	0.768598	0.696823
18.925	0.788221	0.738519		18.925	0.766232	0.722866		18.925	0.768708	0.710624		18.925	0.769762	0.696906
18.975	0.788981	0.738218		18.975	0.76677	0.723817		18.975	0.770022	0.710955		18.975	0.771176	0.696691
19.025	0.788915	0.740343		19.025	0.767128	0.725358		19.025	0.770783	0.71249		19.025	0.773333	0.69799
19.075	0.788899	0.7398		19.075	0.768074	0.725607		19.075	0.771158	0.71277		19.075	0.771926	0.699996
19.125	0.790051	0.740934		19.125	0.768526	0.726439		19.125	0.771404	0.713494		19.125	0.773917	0.698392
19.175	0.7901	0.74131		19.175	0.768953	0.72689		19.175	0.772403	0.713801		19.175	0.774924	0.70123
19.225	0.791872	0.741823		19.225	0.770123	0.727862		19.225	0.773652	0.715061		19.225	0.774235	0.700249
19.275	0.79174	0.742831		19.275	0.771571	0.728683		19.275	0.774829	0.715526		19.275	0.774808	0.702745
19.325	0.792536	0.742709		19.325	0.771427	0.72881		19.325	0.774832	0.716022		19.325	0.775301	0.700688
19.375	0.793396	0.743592		19.375	0.77216	0.729599		19.375	0.775383	0.716659		19.375	0.775425	0.703152
19.425	0.794271	0.744443		19.425	0.773243	0.730588		19.425	0.776341	0.717328		19.425	0.77749	0.702898
19.475	0.794316	0.74482		19.475	0.773174	0.731202		19.475	0.777033	0.718761		19.475	0.778341	0.703753
19.525	0.795612	0.745241		19.525	0.77513	0.731655		19.525	0.777436	0.718624		19.525	0.778061	0.704262
19.575	0.795814	0.745738		19.575	0.775322	0.732723		19.575	0.778821	0.719668		19.575	0.779406	0.705934
19.625	0.796496	0.746181		19.625	0.775942	0.732977		19.625	0.778716	0.720745		19.625	0.779244	0.70523
19.675	0.796711	0.74754		19.675	0.776606	0.734111		19.675	0.779981	0.720995		19.675	0.778678	0.70637
19.725	0.797292	0.74831		19.725	0.77684	0.73487		19.725	0.780477	0.721842		19.725	0.779399	0.705985
19.775	0.798123	0.747249		19.775	0.778385	0.735349		19.775	0.781449	0.721745		19.775	0.780696	0.709201
19.825	0.798991	0.74957		19.825	0.778174	0.736119		19.825	0.781704	0.723493		19.825	0.781835	0.709156
19.875	0.799157	0.749565		19.875	0.779593	0.73682		19.875	0.783034	0.723399		19.875	0.782806	0.70931
19.925	0.799831	0.749261		19.925	0.779855	0.737689		19.925	0.782826	0.723923		19.925	0.784363	0.71055
19.975	0.800882	0.750543		19.975	0.780773	0.738204		19.975	0.783824	0.724224		19.975	0.78402	0.710773
20.025	0.80149	0.751384		20.025	0.781688	0.738756		20.025	0.78507	0.725446		20.025	0.785656	0.710936
20.075	0.801986	0.751473		20.075	0.78215	0.73955		20.075	0.785328	0.726469		20.075	0.785613	0.712622
20.125	0.802768	0.752554		20.125	0.78269	0.740581		20.125	0.785512	0.726824		20.125	0.784186	0.713062
20.175	0.802769	0.753296		20.175	0.783614	0.740984		20.175	0.786824	0.728457		20.175	0.78661	0.713641
20.225	0.803663	0.754175		20.225	0.784008	0.741463		20.225	0.787528	0.728726		20.225	0.787191	0.714569
20.275	0.804224	0.753646		20.275	0.785005	0.741665		20.275	0.788054	0.728958		20.275	0.788218	0.716374
20.325	0.804752	0.754639		20.325	0.785577	0.742526		20.325	0.788745	0.730299		20.325	0.787723	0.714906
20.375	0.805627	0.755185		20.375	0.786534	0.743328		20.375	0.78954	0.729508		20.375	0.789829	0.716594
20.425	0.805618	0.75644		20.425	0.787225	0.74376		20.425	0.790204	0.731101		20.425	0.79036	0.716897
20.475	0.806596	0.756737		20.475	0.787761	0.744979		20.475	0.790607	0.731187		20.475	0.791235	0.717781
20.525	0.80664	0.756445		20.525	0.788418	0.745611		20.525	0.791617	0.732433		20.525	0.791147	0.718101
20.575	0.808	0.757282		20.575	0.788628	0.745744		20.575	0.792367	0.732853		20.575	0.790924	0.721454
20.625	0.808152	0.757467		20.625	0.789705	0.746564		20.625	0.793147	0.732716		20.625	0.793497	0.720445
20.675	0.808657	0.758519		20.675	0.790661	0.747372		20.675	0.793164	0.734129		20.675	0.793245	0.721285
20.725	0.809145	0.759651		20.725	0.790433	0.748202		20.725	0.793919	0.735131		20.725	0.792054	0.7211
20.775	0.810012	0.759676		20.775	0.791926	0.748443		20.775	0.794818	0.734913		20.775	0.794073	0.721378
20.825	0.810812	0.760276		20.825	0.792963	0.74909		20.825	0.795424	0.736843		20.825	0.79472	0.723764
20.875	0.810815	0.761248		20.875	0.792882	0.750252		20.875	0.795664	0.737376		20.875	0.796031	0.7234
20.925	0.811758	0.761577		20.925	0.794099	0.750781		20.925	0.797349	0.737583		20.925	0.79572	0.725235
20.975	0.811616	0.762875		20.975	0.794545	0.751195		20.975	0.797404	0.737923		20.975	0.796854	0.72472
21.025	0.812595	0.763628		21.025	0.795599	0.752358		21.025	0.798139	0.738377		21.025	0.797325	0.724151
21.075	0.813378	0.763709		21.075	0.796186	0.752225		21.075	0.798381	0.73936		21.075	0.797749	0.726717
21.125	0.813274	0.764033		21.125	0.795708	0.753492		21.125	0.798987	0.739596		21.125	0.799417	0.727158
21.175	0.814601	0.765284		21.175	0.796834	0.754102		21.175	0.799401	0.74051		21.175	0.799309	0.727368
21.225	0.814558	0.765847		21.225	0.798234	0.754658		21.225	0.800475	0.740777		21.225	0.801494	0.727965
21.275	0.815701	0.765857		21.275	0.798405	0.754998		21.275	0.801336	0.741775		21.275	0.801018	0.72917
21.325	0.816592	0.7667		21.325	0.799065	0.755676		21.325	0.801439	0.742427		21.325	0.801673	0.729781
21.375	0.81651	0.766506		21.375	0.799695	0.756046		21.375	0.802075	0.742247		21.375	0.801318	0.730532
21.425	0.816885	0.767365		21.425	0.800327	0.75681		21.425	0.803083	0.743711		21.425	0.802109	0.73093
21.475	0.81838	0.768682		21.475	0.801162	0.757589		21.475	0.8035	0.744595		21.475	0.803498	0.732219
21.525	0.818423	0.76807		21.525	0.801701	0.758257		21.525	0.804519	0.745007		21.525	0.803873	0.732824
21.575	0.818907	0.769153		21.575	0.802281	0.758871		21.575	0.804562	0.746393		21.575	0.803049	0.733585
21.625	0.819206	0.76968		21.625	0.801958	0.759753		21.625	0.804885	0.746134		21.625	0.804739	0.734165
21.675	0.819442	0.770872		21.675	0.803087	0.760663		21.675	0.806059	0.747271		21.675	0.806999	0.735295
21.725	0.82078	0.77152		21.725	0.804045	0.760714		21.725	0.807307	0.747955		21.725	0.805992	0.736062
21.775	0.820759	0.772499		21.775	0.804699	0.761309		21.775	0.807368	0.748455		21.775	0.806898	0.736129
21.825	0.821783	0.772418		21.825	0.806087	0.761816		21.825	0.808129	0.748936		21.825	0.807849	0.737087
21.875	0.821809	0.772878		21.875	0.806234	0.76236		21.875	0.808897	0.749036		21.875	0.80744	0.737015
21.925	0.821986	0.774173		21.925	0.806394	0.763367		21.925	0.809209	0.750769		21.925	0.810005	0.739112
21.975	0.823365	0.774271		21.975	0.806744	0.763917		21.975	0.809157	0.750539		21.975	0.810194	0.739607
22.025	0.823854	0.774997		22.025	0.808274	0.764528		22.025	0.810192	0.751504		22.025	0.810465	0.739734
22.075	0.823648	0.775408		22.075	0.808519	0.764766		22.075	0.811046	0.751871		22.075	0.81048	0.739262
22.125	0.824648	0.77628		22.125	0.808783	0.766151		22.125	0.811554	0.753006		22.125	0.811731	0.741019
22.175	0.825255	0.776879		22.175	0.810232	0.766233		22.175	0.812821	0.753424		22.175	0.811672	0.742003
22.225	0.825279	0.776729		22.225	0.809804	0.767285		22.225	0.812189	0.754627		22.225	0.812788	0.742898
22.275	0.826285	0.777582		22.275	0.810768	0.767427		22.275	0.813651	0.754556		22.275	0.812795	0.744123
22.325	0.827272	0.778263		22.325	0.812365	0.768151		22.325	0.814099	0.754879		22.325	0.814218	0.743417
22.375	0.826709	0.778418		22.375	0.812487	0.768696		22.375	0.814881	0.755582		22.375	0.813967	0.744491
22.425	0.828038	0.779624		22.425	0.813074	0.769423		22.425	0.815817	0.756116		22.425	0.814467	0.744852
22.475	0.828244	0.780042		22.475	0.813868	0.769618		22.475	0.816265	0.756511		22.475	0.814766	0.744738
22.525	0.828839	0.78023		22.525	0.814044	0.770111		22.525	0.815901	0.757744		22.525	0.81446	0.746905
22.575	0.829273	0.781624		22.575	0.814148	0.771284		22.575	0.816328	0.758666		22.575	0.815872	0.746821
22.625	0.829586	0.781858		22.625	0.815634	0.770978		22.625	0.817428	0.759445		22.625	0.815897	0.749446
22.675	0.830392	0.782081		22.675	0.815894	0.772363		22.675	0.817948	0.759702		22.675	0.817755	0.748436
22.725	0.830675	0.782586		22.725	0.816574	0.772461		22.725	0.819048	0.76003		22.725	0.819518	0.750378
22.775	0.830887	0.783084		22.775	0.816306	0.772905		22.775	0.819602	0.760502		22.775	0.818925	0.749318
22.825	0.831777	0.783674		22.825	0.817831	0.773763		22.825	0.820063	0.761042		22.825	0.818611	0.749959
22.875	0.832286	0.784115		22.875	0.817961	0.774298		22.875	0.820384	0.76147		22.875	0.820579	0.750002
22.925	0.833134	0.785075		22.925	0.818749	0.774927		22.925	0.820711	0.762846		22.925	0.819895	0.751736
22.975	0.833758	0.785617		22.975	0.819772	0.775362		22.975	0.821227	0.763518		22.975	0.821772	0.752867
23.025	0.83426	0.785707		23.025	0.820379	0.776083		23.025	0.822436	0.763598		23.025	0.822413	0.75295
23.075	0.834237	0.787074		23.075	0.820475	0.776653		23.075	0.82257	0.764356		23.075	0.823617	0.753371
23.125	0.835011	0.786503		23.125	0.821786	0.777181		23.125	0.823478	0.764884		23.125	0.822605	0.75499
23.175	0.834955	0.788026		23.175	0.821878	0.778321		23.175	0.823415	0.765836		23.175	0.824177	0.754985
23.225	0.836233	0.788028		23.225	0.822639	0.778634		23.225	0.824368	0.766119		23.225	0.824029	0.755334
23.275	0.836219	0.78839		23.275	0.823212	0.779018		23.275	0.824998	0.766496		23.275	0.82417	0.756637
23.325	0.836778	0.788872		23.325	0.823699	0.779275		23.325	0.826201	0.767171		23.325	0.826455	0.756478
23.375	0.837853	0.78961		23.375	0.824678	0.779948		23.375	0.826733	0.767587		23.375	0.826399	0.756399
23.425	0.837923	0.790137		23.425	0.82506	0.780444		23.425	0.826968	0.768245		23.425	0.827016	0.759192
23.475	0.838074	0.790109		23.475	0.825459	0.781142		23.475	0.827617	0.768508		23.475	0.827492	0.757971
23.525	0.838954	0.79158		23.525	0.826072	0.781614		23.525	0.827674	0.769024		23.525	0.828295	0.76069
23.575	0.838992	0.791618		23.575	0.826669	0.782261		23.575	0.828673	0.770338		23.575	0.829641	0.75976
23.625	0.840302	0.792069		23.625	0.826818	0.782536		23.625	0.82839	0.770215		23.625	0.828166	0.759398
23.675	0.840695	0.792727		23.675	0.827712	0.78329		23.675	0.829676	0.771347		23.675	0.828995	0.760498
23.725	0.84083	0.793299		23.725	0.828651	0.783753		23.725	0.830044	0.771949		23.725	0.829786	0.760424
23.775	0.841	0.793569		23.775	0.828644	0.783848		23.775	0.830434	0.77231		23.775	0.830688	0.761796
23.825	0.841686	0.7941		23.825	0.829635	0.784631		23.825	0.830925	0.773189		23.825	0.832305	0.762566
23.875	0.842347	0.794187		23.875	0.829901	0.785302		23.875	0.831859	0.773243		23.875	0.831575	0.76359
23.925	0.842766	0.79507		23.925	0.830786	0.785761		23.925	0.832328	0.774102		23.925	0.83267	0.763544
23.975	0.843625	0.794928		23.975	0.831522	0.786248		23.975	0.832802	0.774342		23.975	0.832107	0.763323
24.025	0.843843	0.795881		24.025	0.832	0.786744		24.025	0.833849	0.775301		24.025	0.834307	0.764063
24.075	0.844235	0.796059		24.075	0.832527	0.787503		24.075	0.833991	0.775661		24.075	0.833593	0.766094
24.125	0.8448	0.796575		24.125	0.832944	0.787894		24.125	0.834848	0.776185		24.125	0.83458	0.765121
24.175	0.845558	0.79661		24.175	0.833909	0.78814		24.175	0.834977	0.77678		24.175	0.833967	0.765122
24.225	0.845941	0.798121		24.225	0.833843	0.788773		24.225	0.835588	0.777417		24.225	0.834309	0.766629
24.275	0.846336	0.797828		24.275	0.834724	0.789087		24.275	0.83628	0.777979		24.275	0.835596	0.76688
24.325	0.846644	0.799077		24.325	0.835683	0.790314		24.325	0.836791	0.778895		24.325	0.837151	0.767899
24.375	0.847348	0.799201		24.375	0.835872	0.790487		24.375	0.837079	0.779341		24.375	0.837151	0.768691
24.425	0.848032	0.799254		24.425	0.836459	0.791148		24.425	0.837495	0.779733		24.425	0.838239	0.769257
24.475	0.848011	0.800781		24.475	0.836324	0.791559		24.475	0.837962	0.780428		24.475	0.837877	0.770651
24.525	0.848688	0.800431		24.525	0.837367	0.792387		24.525	0.838727	0.781142		24.525	0.839352	0.771035
24.575	0.848973	0.801473		24.575	0.837836	0.792797		24.575	0.839552	0.781739		24.575	0.838837	0.772679
24.625	0.849438	0.801781		24.625	0.838862	0.793534		24.625	0.839992	0.782194		24.625	0.839536	0.77211
24.675	0.849529	0.802138		24.675	0.839539	0.793938		24.675	0.840262	0.783311		24.675	0.840662	0.772013
24.725	0.850559	0.802727		24.725	0.839549	0.79409		24.725	0.84105	0.783307		24.725	0.841193	0.772065
24.775	0.850942	0.802663		24.775	0.840174	0.794096		24.775	0.841347	0.783452		24.775	0.841488	0.773467
24.825	0.851194	0.803107		24.825	0.840968	0.794836		24.825	0.842175	0.784539		24.825	0.841352	0.774185
24.875	0.852298	0.803969		24.875	0.84175	0.795573		24.875	0.843022	0.784556		24.875	0.841482	0.774214
24.925	0.85323	0.804672		24.925	0.842178	0.796171		24.925	0.843717	0.785591		24.925	0.842364	0.776394
24.975	0.85284	0.804478		24.975	0.842502	0.796182		24.975	0.843631	0.78584		24.975	0.843948	0.775252
25.025	0.853521	0.804996		25.025	0.843027	0.797017		25.025	0.843921	0.786373		25.025	0.842603	0.776021
25.075	0.853378	0.805715		25.075	0.843565	0.797626		25.075	0.844981	0.787182		25.075	0.846523	0.775338
25.125	0.854275	0.805559		25.125	0.843894	0.797812		25.125	0.845042	0.787895		25.125	0.845117	0.776743
25.175	0.855181	0.80704		25.175	0.845164	0.798737		25.175	0.845549	0.788163		25.175	0.843753	0.778294
25.225	0.855829	0.807196		25.225	0.845276	0.798894		25.225	0.84633	0.788987		25.225	0.84522	0.780254
25.275	0.856046	0.807092		25.275	0.846175	0.799399		25.275	0.847179	0.789132		25.275	0.847119	0.779861
25.325	0.856298	0.808118		25.325	0.84659	0.799974		25.325	0.847118	0.789886		25.325	0.846371	0.778778
25.375	0.857026	0.808585		25.375	0.847007	0.800314		25.375	0.848374	0.790484		25.375	0.847312	0.780884
25.425	0.857196	0.809153		25.425	0.84775	0.800819		25.425	0.848055	0.791259		25.425	0.847739	0.780079
25.475	0.857741	0.809096		25.475	0.848395	0.801762		25.475	0.848756	0.791934		25.475	0.848328	0.781104
25.525	0.858049	0.809779		25.525	0.848929	0.801904		25.525	0.849688	0.792201		25.525	0.84901	0.782071
25.575	0.85828	0.810367		25.575	0.849465	0.802445		25.575	0.85041	0.792375		25.575	0.849078	0.781679
25.625	0.858854	0.810818		25.625	0.85017	0.802726		25.625	0.850611	0.793298		25.625	0.85077	0.782795
25.675	0.85943	0.810905		25.675	0.850747	0.803432		25.675	0.851069	0.793726		25.675	0.850863	0.784545
25.725	0.860024	0.811429		25.725	0.851121	0.803932		25.725	0.852087	0.794458		25.725	0.850753	0.783437
25.775	0.860737	0.811994		25.775	0.851156	0.804674		25.775	0.851707	0.794937		25.775	0.850167	0.784012
25.825	0.861083	0.812459		25.825	0.852253	0.804966		25.825	0.852835	0.795585		25.825	0.851895	0.785398
25.875	0.861665	0.813341		25.875	0.852823	0.805569		25.875	0.853657	0.796019		25.875	0.8528	0.785972
25.925	0.861692	0.813788		25.925	0.852845	0.805883		25.925	0.853899	0.796416		25.925	0.853553	0.787351
25.975	0.862334	0.814149		25.975	0.853591	0.806436		25.975	0.854236	0.7973		25.975	0.852948	0.786619
26.025	0.863372	0.814467		26.025	0.854287	0.806777		26.025	0.855	0.797793		26.025	0.854336	0.786765
26.075	0.863281	0.814846		26.075	0.85485	0.80754		26.075	0.854984	0.798753		26.075	0.854624	0.787201
26.125	0.863556	0.815379		26.125	0.854796	0.807974		26.125	0.855731	0.798573		26.125	0.85571	0.787815
26.175	0.86441	0.815984		26.175	0.855612	0.808464		26.175	0.856041	0.799515		26.175	0.857203	0.788613
26.225	0.86529	0.816504		26.225	0.856516	0.809153		26.225	0.856912	0.799923		26.225	0.854532	0.78963
26.275	0.865311	0.817014		26.275	0.856506	0.809341		26.275	0.857117	0.800843		26.275	0.855448	0.790259
26.325	0.865468	0.817371		26.325	0.85732	0.809552		26.325	0.857662	0.801457		26.325	0.856138	0.789936
26.375	0.865697	0.817369		26.375	0.858134	0.810522		26.375	0.858383	0.801605		26.375	0.857354	0.791547
26.425	0.866812	0.818421		26.425	0.85802	0.810803		26.425	0.858791	0.802451		26.425	0.857827	0.791134
26.475	0.867002	0.818544		26.475	0.858419	0.811192		26.475	0.858559	0.802998		26.475	0.859478	0.79189
26.525	0.867484	0.818599		26.525	0.85946	0.811601		26.525	0.859877	0.803037		26.525	0.858805	0.792093
26.575	0.867789	0.819431		26.575	0.860298	0.811845		26.575	0.860281	0.803937		26.575	0.859038	0.791653
26.625	0.868639	0.820122		26.625	0.860499	0.812574		26.625	0.861217	0.804604		26.625	0.858378	0.79188
26.675	0.869455	0.819754		26.675	0.86095	0.812719		26.675	0.861761	0.804851		26.675	0.859699	0.792683
26.725	0.869471	0.820909		26.725	0.861597	0.813669		26.725	0.862402	0.805267		26.725	0.861008	0.793658
26.775	0.869083	0.821392		26.775	0.861618	0.813674		26.775	0.862512	0.805928		26.775	0.860902	0.793754
26.825	0.87041	0.821547		26.825	0.862673	0.814379		26.825	0.86307	0.806462		26.825	0.861787	0.794719
26.875	0.870545	0.82206		26.875	0.86276	0.814956		26.875	0.863405	0.807377		26.875	0.861929	0.796079
26.925	0.870999	0.821826		26.925	0.863138	0.815207		26.925	0.864252	0.80753		26.925	0.862035	0.796694
26.975	0.87153	0.823093		26.975	0.8639	0.816254		26.975	0.864502	0.80856		26.975	0.861806	0.797087
27.025	0.871758	0.823182		27.025	0.864648	0.816865		27.025	0.865093	0.808772		27.025	0.862795	0.798534
27.075	0.872866	0.823207		27.075	0.865774	0.816561		27.075	0.86554	0.808996		27.075	0.864314	0.797725
27.125	0.872828	0.824125		27.125	0.865777	0.817363		27.125	0.865908	0.810035		27.125	0.864372	0.799526
27.175	0.873397	0.824179		27.175	0.866436	0.817476		27.175	0.866604	0.810277		27.175	0.864882	0.799849
27.225	0.87434	0.825125		27.225	0.866635	0.817552		27.225	0.866911	0.810538		27.225	0.865377	0.799875
27.275	0.874231	0.825743		27.275	0.867251	0.818502		27.275	0.867282	0.810958		27.275	0.866384	0.800846
27.325	0.873853	0.825802		27.325	0.867227	0.819102		27.325	0.867746	0.811836		27.325	0.865244	0.800994
27.375	0.874823	0.826385		27.375	0.868348	0.819632		27.375	0.867813	0.812265		27.375	0.866314	0.801221
27.425	0.874884	0.826957		27.425	0.868466	0.819683		27.425	0.869149	0.812832		27.425	0.867071	0.801491
27.475	0.875365	0.827732		27.475	0.869083	0.820362		27.475	0.869454	0.812901		27.475	0.867103	0.802858
27.525	0.876161	0.827597		27.525	0.869841	0.820538		27.525	0.87007	0.813798		27.525	0.868342	0.802755
27.575	0.876841	0.827921		27.575	0.869766	0.820528		27.575	0.870129	0.814372		27.575	0.868529	0.803243
27.625	0.876803	0.828449		27.625	0.870598	0.821427		27.625	0.870745	0.814692		27.625	0.867859	0.804429
27.675	0.877974	0.828645		27.675	0.871424	0.821722		27.675	0.871552	0.815467		27.675	0.869218	0.804703
27.725	0.877539	0.82861		27.725	0.8715	0.822184		27.725	0.871662	0.815604		27.725	0.869285	0.805785
27.775	0.878016	0.829563		27.775	0.872194	0.822516		27.775	0.872024	0.815707		27.775	0.871067	0.805744
27.825	0.878622	0.830324		27.825	0.872114	0.823014		27.825	0.872823	0.816665		27.825	0.871278	0.807016
27.875	0.879377	0.830492		27.875	0.87321	0.823616		27.875	0.873156	0.817087		27.875	0.87127	0.80636
27.925	0.879563	0.831276		27.925	0.873349	0.823991		27.925	0.873671	0.818113		27.925	0.871486	0.807092
27.975	0.880012	0.830971		27.975	0.873939	0.824221		27.975	0.874202	0.817975		27.975	0.872278	0.808003
28.025	0.880309	0.832431		28.025	0.874482	0.824859		28.025	0.874578	0.81854		28.025	0.872502	0.807881
28.075	0.880908	0.831825		28.075	0.87485	0.825115		28.075	0.875845	0.818792		28.075	0.872596	0.808248
28.125	0.881447	0.833111		28.125	0.875696	0.825932		28.125	0.876102	0.819708		28.125	0.873352	0.80874
28.175	0.881756	0.832899		28.175	0.875641	0.826259		28.175	0.876183	0.819787		28.175	0.875088	0.808879
28.225	0.882016	0.833521		28.225	0.876607	0.826696		28.225	0.876859	0.820666		28.225	0.873656	0.809276
28.275	0.882587	0.834285		28.275	0.876741	0.826783		28.275	0.877351	0.820726		28.275	0.875083	0.80986
28.325	0.883042	0.834361		28.325	0.877419	0.827788		28.325	0.877305	0.821167		28.325	0.874692	0.810324
28.375	0.883103	0.834751		28.375	0.877625	0.827842		28.375	0.878228	0.821652		28.375	0.874517	0.810522
28.425	0.883313	0.835955		28.425	0.877854	0.828513		28.425	0.878257	0.822581		28.425	0.876433	0.81162
28.475	0.884247	0.835885		28.475	0.878856	0.828829		28.475	0.878808	0.823208		28.475	0.876745	0.813106
28.525	0.884393	0.836508		28.525	0.878947	0.829237		28.525	0.879519	0.82377		28.525	0.877785	0.812336
28.575	0.884808	0.836813		28.575	0.879598	0.829808		28.575	0.879559	0.824068		28.575	0.877348	0.811134
28.625	0.88524	0.837481		28.625	0.879589	0.829885		28.625	0.880251	0.824137		28.625	0.879541	0.814929
28.675	0.885308	0.837773		28.675	0.879991	0.830166		28.675	0.880291	0.824741		28.675	0.876582	0.814227
28.725	0.886145	0.837581		28.725	0.88065	0.830837		28.725	0.881256	0.824934		28.725	0.878193	0.81515
28.775	0.886826	0.838721		28.775	0.88134	0.831276		28.775	0.881709	0.825999		28.775	0.878896	0.815566
28.825	0.886625	0.83914		28.825	0.881611	0.831811		28.825	0.881733	0.826369		28.825	0.879183	0.815158
28.875	0.88713	0.83913		28.875	0.882289	0.832177		28.875	0.882631	0.826532		28.875	0.880758	0.814681
28.925	0.887485	0.839613		28.925	0.882636	0.831961		28.925	0.883157	0.827408		28.925	0.879689	0.816218
28.975	0.887856	0.840053		28.975	0.88266	0.832971		28.975	0.883192	0.827737		28.975	0.881956	0.816741
29.025	0.888607	0.840418		29.025	0.883565	0.833572		29.025	0.883718	0.828536		29.025	0.881296	0.817755
29.075	0.889055	0.840871		29.075	0.883889	0.833733		29.075	0.884166	0.828405		29.075	0.882404	0.817747
29.125	0.889155	0.841684		29.125	0.884723	0.834364		29.125	0.884788	0.829062		29.125	0.883224	0.819185
29.175	0.889365	0.841674		29.175	0.884908	0.834593		29.175	0.884962	0.829842		29.175	0.882249	0.819941
29.225	0.889899	0.842191		29.225	0.885278	0.834998		29.225	0.885987	0.829856		29.225	0.882977	0.81963
29.275	0.890278	0.842927		29.275	0.88542	0.835519		29.275	0.885827	0.830825		29.275	0.883325	0.820055
29.325	0.891066	0.842877		29.325	0.886378	0.836049		29.325	0.886453	0.831126		29.325	0.88332	0.820183
29.375	0.891531	0.84384		29.375	0.886882	0.836271		29.375	0.887142	0.831664		29.375	0.885077	0.820545
29.425	0.891417	0.84378		29.425	0.88723	0.836747		29.425	0.887233	0.832265		29.425	0.884428	0.82124
29.475	0.892323	0.844115		29.475	0.887673	0.837059		29.475	0.888358	0.832416		29.475	0.884316	0.821805
29.525	0.892688	0.844596		29.525	0.888252	0.837879		29.525	0.888405	0.832821		29.525	0.886026	0.823224
29.575	0.892605	0.845326		29.575	0.888614	0.837979		29.575	0.888831	0.833205		29.575	0.887143	0.822423
29.625	0.893507	0.845533		29.625	0.889012	0.838545		29.625	0.888994	0.834087		29.625	0.886424	0.823642
29.675	0.893912	0.846581		29.675	0.889409	0.838835		29.675	0.889787	0.834513		29.675	0.886948	0.823866
29.725	0.894261	0.846814		29.725	0.889841	0.839594		29.725	0.889854	0.835258		29.725	0.887473	0.825282
29.775	0.89429	0.847091		29.775	0.890349	0.839634		29.775	0.890256	0.835286		29.775	0.887495	0.82577
29.825	0.894582	0.847379		29.825	0.890396	0.839785		29.825	0.890859	0.835895		29.825	0.888484	0.82536
29.875	0.89521	0.847518		29.875	0.891376	0.840456		29.875	0.891144	0.835992		29.875	0.889084	0.826829
29.925	0.895548	0.847661		29.925	0.891465	0.84087		29.925	0.891558	0.836527		29.925	0.890006	0.827122
29.975	0.895971	0.848243		29.975	0.892037	0.841158		29.975	0.89246	0.836801		29.975	0.889283	0.827571
30.025	0.896504	0.848769		30.025	0.892236	0.841517		30.025	0.892851	0.837576		30.025	0.889015	0.828556
30.075	0.897089	0.849011		30.075	0.892745	0.841727		30.075	0.89261	0.837765		30.075	0.891243	0.828091
30.125	0.896731	0.849936		30.125	0.893008	0.842752		30.125	0.893444	0.8389		30.125	0.890681	0.82856
30.175	0.897451	0.849557		30.175	0.893523	0.842736		30.175	0.893996	0.83878		30.175	0.890355	0.830278
30.225	0.897771	0.850879		30.225	0.894177	0.843317		30.225	0.894584	0.839413		30.225	0.892391	0.83011
30.275	0.898664	0.851124		30.275	0.894302	0.843827		30.275	0.894621	0.84031		30.275	0.891486	0.831312
30.325	0.898485	0.851264		30.325	0.894924	0.844239		30.325	0.895308	0.840912		30.325	0.892622	0.830999
30.375	0.898965	0.851922		30.375	0.895302	0.84452		30.375	0.895064	0.841134		30.375	0.892852	0.831693
30.425	0.899207	0.851874		30.425	0.895533	0.844694		30.425	0.895821	0.841358		30.425	0.894289	0.831954
30.475	0.89985	0.852264		30.475	0.895732	0.845333		30.475	0.896521	0.841895		30.475	0.893541	0.832466
30.525	0.899904	0.853014		30.525	0.896567	0.845441		30.525	0.896935	0.842155		30.525	0.893686	0.833388
30.575	0.90144	0.852766		30.575	0.897415	0.845884		30.575	0.897163	0.842391		30.575	0.895013	0.832765
30.625	0.900971	0.853721		30.625	0.897368	0.84625		30.625	0.897602	0.843087		30.625	0.895921	0.833088
30.675	0.900982	0.853744		30.675	0.897932	0.846663		30.675	0.898159	0.843451		30.675	0.8947	0.835896
30.725	0.901936	0.854378		30.725	0.898281	0.846953		30.725	0.89845	0.843785		30.725	0.895257	0.834659
30.775	0.902467	0.854575		30.775	0.898503	0.8473		30.775	0.898346	0.844189		30.775	0.896043	0.835147
30.825	0.902574	0.854707		30.825	0.89869	0.847884		30.825	0.898877	0.844679		30.825	0.896278	0.83537
30.875	0.902617	0.85573		30.875	0.89952	0.848057		30.875	0.89988	0.845233		30.875	0.897192	0.836571
30.925	0.90301	0.855828		30.925	0.899931	0.84857		30.925	0.90009	0.846048		30.925	0.896985	0.836429
30.975	0.903621	0.856251		30.975	0.900634	0.848765		30.975	0.900686	0.84592		30.975	0.898347	0.837711
31.025	0.90441	0.856598		31.025	0.901013	0.849386		31.025	0.901149	0.846431		31.025	0.898327	0.836932
31.075	0.904405	0.856994		31.075	0.901029	0.849933		31.075	0.90055	0.847363		31.075	0.898318	0.838598
31.125	0.904494	0.856957		31.125	0.901696	0.850058		31.125	0.901858	0.84769		31.125	0.8985	0.838193
31.175	0.905001	0.85762		31.175	0.90185	0.850156		31.175	0.901922	0.847692		31.175	0.899912	0.838606
31.225	0.905418	0.857967		31.225	0.902352	0.851099		31.225	0.902206	0.848525		31.225	0.901198	0.839751
31.275	0.905734	0.858481		31.275	0.902665	0.851379		31.275	0.902665	0.848497		31.275	0.899933	0.84054
31.325	0.906067	0.859112		31.325	0.902707	0.851815		31.325	0.903235	0.849292		31.325	0.900456	0.841005
31.375	0.906629	0.859356		31.375	0.903636	0.852007		31.375	0.903613	0.849932		31.375	0.900284	0.84171
31.425	0.906757	0.859838		31.425	0.904156	0.852484		31.425	0.904118	0.85008		31.425	0.900947	0.841959
31.475	0.907314	0.860282		31.475	0.904148	0.85289		31.475	0.904857	0.850948		31.475	0.902	0.84196
31.525	0.907184	0.86034		31.525	0.904508	0.853277		31.525	0.904774	0.851211		31.525	0.901865	0.842546
31.575	0.907553	0.86058		31.575	0.904989	0.853309		31.575	0.905118	0.851163		31.575	0.903493	0.843277
31.625	0.908596	0.861008		31.625	0.905713	0.854204		31.625	0.905878	0.851645		31.625	0.903516	0.845273
31.675	0.90811	0.861118		31.675	0.90565	0.854338		31.675	0.905826	0.852159		31.675	0.902204	0.844782
31.725	0.908569	0.861596		31.725	0.906096	0.854764		31.725	0.906189	0.852322		31.725	0.903365	0.846067
31.775	0.909095	0.862788		31.775	0.906947	0.855738		31.775	0.906875	0.853104		31.775	0.903596	0.846018
31.825	0.90936	0.862167		31.825	0.906962	0.855331		31.825	0.906874	0.8532		31.825	0.904613	0.845212
31.875	0.909512	0.862575		31.875	0.907062	0.85597		31.875	0.907158	0.853566		31.875	0.90442	0.846777
31.925	0.910027	0.863435		31.925	0.907391	0.856466		31.925	0.907779	0.854174		31.925	0.905771	0.846509
31.975	0.910638	0.864496		31.975	0.908091	0.856738		31.975	0.907911	0.854742		31.975	0.905014	0.847902
32.025	0.910773	0.86417		32.025	0.90792	0.857191		32.025	0.908222	0.855106		32.025	0.90584	0.848162
32.075	0.910911	0.864461		32.075	0.90872	0.857742		32.075	0.908858	0.855919		32.075	0.906217	0.848463
32.125	0.911261	0.865018		32.125	0.909012	0.858168		32.125	0.909323	0.855858		32.125	0.90782	0.848934
32.175	0.911958	0.865129		32.175	0.909411	0.858222		32.175	0.909643	0.856219		32.175	0.907092	0.849982
32.225	0.912331	0.86553		32.225	0.909991	0.858525		32.225	0.909971	0.856363		32.225	0.907547	0.850442
32.275	0.912483	0.865735		32.275	0.910492	0.858896		32.275	0.91054	0.857126		32.275	0.907943	0.851637
32.325	0.912618	0.866431		32.325	0.910569	0.859454		32.325	0.910669	0.857512		32.325	0.907947	0.850648
32.375	0.913359	0.866215		32.375	0.911232	0.859661		32.375	0.9117	0.85786		32.375	0.908544	0.851383
32.425	0.913543	0.867219		32.425	0.911373	0.860121		32.425	0.911275	0.858121		32.425	0.908664	0.851893
32.475	0.913937	0.867504		32.475	0.911905	0.86023		32.475	0.911861	0.858856		32.475	0.910475	0.852672
32.525	0.91441	0.867865		32.525	0.912119	0.860716		32.525	0.91204	0.859336		32.525	0.909733	0.85304
32.575	0.914956	0.867839		32.575	0.912493	0.861175		32.575	0.912699	0.859763		32.575	0.90985	0.853398
32.625	0.915021	0.868868		32.625	0.913	0.86193		32.625	0.912896	0.860364		32.625	0.911043	0.855107
32.675	0.915537	0.869274		32.675	0.912887	0.861844		32.675	0.913359	0.860205		32.675	0.910774	0.855387
32.725	0.915605	0.869231		32.725	0.913919	0.862226		32.725	0.913689	0.861191		32.725	0.911293	0.85525
32.775	0.915942	0.869959		32.775	0.913681	0.862769		32.775	0.913985	0.861462		32.775	0.911618	0.856416
32.825	0.916064	0.870364		32.825	0.914042	0.862958		32.825	0.914586	0.861784		32.825	0.910608	0.856486
32.875	0.916641	0.870616		32.875	0.914503	0.863658		32.875	0.914714	0.862254		32.875	0.912384	0.856734
32.925	0.916413	0.870705		32.925	0.91436	0.863635		32.925	0.914919	0.862158		32.925	0.912307	0.857046
32.975	0.916628	0.871289		32.975	0.915084	0.863991		32.975	0.915207	0.862719		32.975	0.913	0.856912
33.025	0.9179	0.871277		33.025	0.915559	0.864124		33.025	0.915502	0.86275		33.025	0.913796	0.85823
33.075	0.917578	0.871647		33.075	0.916028	0.864798		33.075	0.916369	0.863487		33.075	0.913466	0.858379
33.125	0.91805	0.872078		33.125	0.916395	0.865256		33.125	0.91631	0.86433		33.125	0.914833	0.858468
33.175	0.918963	0.872838		33.175	0.916514	0.865541		33.175	0.917025	0.864647		33.175	0.914044	0.858439
33.225	0.918946	0.873026		33.225	0.91684	0.865823		33.225	0.916555	0.864943		33.225	0.913227	0.858988
33.275	0.919149	0.873497		33.275	0.91746	0.866396		33.275	0.917071	0.865096		33.275	0.9147	0.860761
33.325	0.919313	0.873656		33.325	0.917811	0.866485		33.325	0.91781	0.865444		33.325	0.91506	0.860766
33.375	0.920146	0.873987		33.375	0.918069	0.867091		33.375	0.918125	0.866168		33.375	0.915676	0.861438
33.425	0.920151	0.87395		33.425	0.918267	0.867426		33.425	0.918064	0.866564		33.425	0.915728	0.86254
33.475	0.92073	0.874688		33.475	0.918436	0.867556		33.475	0.91862	0.867044		33.475	0.917206	0.8622
33.525	0.92042	0.874857		33.525	0.919027	0.868138		33.525	0.918922	0.867549		33.525	0.915943	0.864531
33.575	0.921104	0.875124		33.575	0.919863	0.868733		33.575	0.919593	0.868026		33.575	0.917879	0.864527
33.625	0.921536	0.875144		33.625	0.919829	0.868851		33.625	0.919582	0.868045		33.625	0.917792	0.863431
33.675	0.921795	0.876143		33.675	0.920069	0.868851		33.675	0.919962	0.868016		33.675	0.918825	0.863554
33.725	0.92202	0.876345		33.725	0.920283	0.868998		33.725	0.920238	0.868611		33.725	0.917711	0.864588
33.775	0.922139	0.876462		33.775	0.920742	0.869843		33.775	0.920543	0.869475		33.775	0.918444	0.864662
33.825	0.922734	0.877297		33.825	0.921244	0.870516		33.825	0.921174	0.870002		33.825	0.918993	0.865455
33.875	0.923527	0.876891		33.875	0.921548	0.87044		33.875	0.921675	0.870261		33.875	0.919144	0.865898
33.925	0.923126	0.877223		33.925	0.921513	0.870691		33.925	0.921726	0.870559		33.925	0.919462	0.866936
33.975	0.923838	0.877396		33.975	0.92219	0.870997		33.975	0.922032	0.8708		33.975	0.919658	0.867574
34.025	0.923528	0.877685		34.025	0.922517	0.871589		34.025	0.922638	0.870945		34.025	0.919677	0.867486
34.075	0.924004	0.878116		34.075	0.922681	0.871923		34.075	0.922468	0.87149		34.075	0.919943	0.868897
34.125	0.924435	0.878696		34.125	0.923059	0.872321		34.125	0.923252	0.872211		34.125	0.920476	0.869713
34.175	0.924572	0.878987		34.175	0.923328	0.872663		34.175	0.923152	0.87227		34.175	0.921944	0.870203
34.225	0.924917	0.879398		34.225	0.923571	0.872942		34.225	0.923793	0.872748		34.225	0.921791	0.869939
34.275	0.924854	0.879838		34.275	0.924138	0.873204		34.275	0.923891	0.873243		34.275	0.921792	0.870192
34.325	0.925752	0.880067		34.325	0.924217	0.873825		34.325	0.923848	0.873459		34.325	0.92222	0.870887
34.375	0.925671	0.880088		34.375	0.924759	0.873639		34.375	0.924156	0.873787		34.375	0.923312	0.871414
34.425	0.926153	0.881127		34.425	0.924771	0.874348		34.425	0.924773	0.874003		34.425	0.92283	0.871844
34.475	0.926223	0.88152		34.475	0.92512	0.875103		34.475	0.924885	0.874788		34.475	0.923241	0.871914
34.525	0.926647	0.881641		34.525	0.925402	0.87505		34.525	0.925533	0.875248		34.525	0.924028	0.872042
34.575	0.926636	0.881792		34.575	0.925746	0.875311		34.575	0.925359	0.875438		34.575	0.923564	0.873886
34.625	0.92757	0.881914		34.625	0.926305	0.875679		34.625	0.925988	0.876174		34.625	0.924439	0.872595
34.675	0.927628	0.882641		34.675	0.926249	0.875982		34.675	0.926224	0.876308		34.675	0.924543	0.873798
34.725	0.927703	0.882935		34.725	0.926834	0.876437		34.725	0.92668	0.876246		34.725	0.924614	0.874044
34.775	0.928203	0.883303		34.775	0.926593	0.876854		34.775	0.926638	0.877132		34.775	0.924893	0.874164
34.825	0.928547	0.883195		34.825	0.927166	0.877087		34.825	0.926927	0.877656		34.825	0.926225	0.87595
34.875	0.929044	0.883783		34.875	0.92769	0.877615		34.875	0.927899	0.877667		34.875	0.92539	0.876065
34.925	0.928829	0.884199		34.925	0.928062	0.878134		34.925	0.927779	0.878111		34.925	0.925828	0.876064
34.975	0.929671	0.884375		34.975	0.928503	0.878341		34.975	0.928131	0.878747		34.975	0.926994	0.876262
35.025	0.929413	0.884788		35.025	0.928487	0.878571		35.025	0.928612	0.879108		35.025	0.926958	0.876788
35.075	0.930191	0.885173		35.075	0.928837	0.879118		35.075	0.929046	0.879507		35.075	0.926691	0.877592
35.125	0.929781	0.885336		35.125	0.929303	0.879402		35.125	0.928835	0.880029		35.125	0.925709	0.878157
35.175	0.930604	0.88572		35.175	0.929618	0.88		35.175	0.929552	0.880561		35.175	0.927425	0.879094
35.225	0.930534	0.885785		35.225	0.929855	0.879832		35.225	0.929328	0.880473		35.225	0.927606	0.878944
35.275	0.930696	0.886134		35.275	0.930052	0.880374		35.275	0.929911	0.881173		35.275	0.927968	0.879636
35.325	0.931237	0.886441		35.325	0.930603	0.880742		35.325	0.93064	0.881428		35.325	0.929115	0.879998
35.375	0.931527	0.886751		35.375	0.930636	0.88119		35.375	0.930296	0.881926		35.375	0.929128	0.8804
35.425	0.93162	0.886377		35.425	0.930585	0.881591		35.425	0.930691	0.882004		35.425	0.928889	0.880806
35.475	0.932377	0.887959		35.475	0.931305	0.882302		35.475	0.931393	0.882709		35.475	0.929038	0.881452
35.525	0.932578	0.888202		35.525	0.931879	0.882306		35.525	0.931288	0.882787		35.525	0.929381	0.881549
35.575	0.932657	0.888391		35.575	0.931884	0.88238		35.575	0.931773	0.883483		35.575	0.931308	0.882485
35.625	0.933062	0.888861		35.625	0.932267	0.883301		35.625	0.932002	0.883987		35.625	0.930685	0.883152
35.675	0.933267	0.888915		35.675	0.932736	0.883288		35.675	0.93253	0.884282		35.675	0.930712	0.88336
35.725	0.933213	0.888932		35.725	0.932704	0.883373		35.725	0.932329	0.884207		35.725	0.931772	0.882989
35.775	0.934033	0.889309		35.775	0.933451	0.884052		35.775	0.93296	0.884766		35.775	0.930838	0.884093
35.825	0.933952	0.889604		35.825	0.933444	0.884275		35.825	0.932878	0.884757		35.825	0.931363	0.884734
35.875	0.933898	0.890231		35.875	0.933551	0.884673		35.875	0.933194	0.885847		35.875	0.93255	0.884263
35.925	0.934906	0.890039		35.925	0.933966	0.884935		35.925	0.933928	0.885864		35.925	0.932752	0.885912
35.975	0.93461	0.890146		35.975	0.934105	0.885248		35.975	0.933622	0.886352		35.975	0.933144	0.886578
36.025	0.935092	0.891019		36.025	0.93472	0.885881		36.025	0.934154	0.886702		36.025	0.933042	0.886118
36.075	0.935343	0.891036		36.075	0.93489	0.886166		36.075	0.93466	0.886721		36.075	0.933693	0.885947
36.125	0.935659	0.891822		36.125	0.935213	0.886544		36.125	0.935017	0.887534		36.125	0.933437	0.88734
36.175	0.935856	0.892584		36.175	0.935548	0.886836		36.175	0.935122	0.887684		36.175	0.933311	0.886953
36.225	0.935992	0.892793		36.225	0.935876	0.887116		36.225	0.935614	0.888211		36.225	0.933651	0.888145
36.275	0.936351	0.892566		36.275	0.935915	0.887226		36.275	0.935793	0.888638		36.275	0.934524	0.889465
36.325	0.936703	0.893049		36.325	0.936011	0.887796		36.325	0.935959	0.888676		36.325	0.933925	0.88915
36.375	0.936914	0.893175		36.375	0.936537	0.887967		36.375	0.936653	0.889349		36.375	0.934803	0.888833
36.425	0.937346	0.893305		36.425	0.937113	0.888595		36.425	0.936488	0.889776		36.425	0.93541	0.889932
36.475	0.937497	0.893742		36.475	0.937073	0.888859		36.475	0.936612	0.890109		36.475	0.935531	0.890615
36.525	0.937971	0.894527		36.525	0.937393	0.889366		36.525	0.936895	0.89061		36.525	0.935088	0.88969
36.575	0.937822	0.894149		36.575	0.93786	0.889474		36.575	0.937567	0.890562		36.575	0.936881	0.891065
36.625	0.93847	0.895439		36.625	0.938378	0.88982		36.625	0.937921	0.891359		36.625	0.936701	0.89114
36.675	0.938858	0.895264		36.675	0.938334	0.890463		36.675	0.93787	0.891484		36.675	0.936439	0.890807
36.725	0.938885	0.895254		36.725	0.938911	0.890143		36.725	0.938394	0.891956		36.725	0.93663	0.892288
36.775	0.93918	0.89553		36.775	0.938549	0.891029		36.775	0.938215	0.892424		36.775	0.936382	0.891836
36.825	0.939414	0.896747		36.825	0.939171	0.891251		36.825	0.938815	0.892784		36.825	0.93668	0.89279
36.875	0.939875	0.896321		36.875	0.939508	0.891588		36.875	0.939187	0.893158		36.875	0.937689	0.894184
36.925	0.939883	0.896966		36.925	0.939797	0.891809		36.925	0.93952	0.893743		36.925	0.93807	0.894159
36.975	0.940474	0.897078		36.975	0.939902	0.892374		36.975	0.939386	0.894189		36.975	0.938193	0.894049
37.025	0.940354	0.897896		37.025	0.940409	0.892727		37.025	0.940379	0.894405		37.025	0.938338	0.895012
37.075	0.940476	0.898012		37.075	0.9405	0.893003		37.075	0.939957	0.894497		37.075	0.938647	0.895827
37.125	0.940925	0.898334		37.125	0.940857	0.893396		37.125	0.940435	0.895134		37.125	0.939217	0.896166
37.175	0.94105	0.898444		37.175	0.941054	0.893756		37.175	0.940771	0.895595		37.175	0.939456	0.896948
37.225	0.941069	0.898564		37.225	0.941179	0.893975		37.225	0.941049	0.895858		37.225	0.939305	0.896092
37.275	0.941722	0.899095		37.275	0.941307	0.894648		37.275	0.941262	0.896327		37.275	0.939743	0.897972
37.325	0.941766	0.899647		37.325	0.94158	0.894708		37.325	0.941594	0.896617		37.325	0.940051	0.897163
37.375	0.942332	0.899859		37.375	0.942049	0.895107		37.375	0.941988	0.89722		37.375	0.941091	0.89761
37.425	0.942303	0.900019		37.425	0.942229	0.895655		37.425	0.942169	0.897518		37.425	0.941165	0.897832
37.475	0.942291	0.900955		37.475	0.942169	0.89598		37.475	0.941972	0.897856		37.475	0.941275	0.898219
37.525	0.942519	0.900958		37.525	0.942777	0.895999		37.525	0.942304	0.898032		37.525	0.941951	0.899138
37.575	0.943512	0.901647		37.575	0.943219	0.896691		37.575	0.942918	0.898828		37.575	0.941386	0.898772
37.625	0.942732	0.901177		37.625	0.943309	0.896966		37.625	0.942718	0.899081		37.625	0.942098	0.89928
37.675	0.943686	0.901992		37.675	0.943652	0.897593		37.675	0.943472	0.899355		37.675	0.9422	0.89972
37.725	0.943563	0.902126		37.725	0.943921	0.897776		37.725	0.943729	0.899866		37.725	0.94221	0.901487
37.775	0.944122	0.90229		37.775	0.944714	0.897824		37.775	0.943885	0.899887		37.775	0.942024	0.90152
37.825	0.9443	0.902149		37.825	0.94446	0.898117		37.825	0.944063	0.900579		37.825	0.943241	0.901736
37.875	0.944912	0.902905		37.875	0.944807	0.898804		37.875	0.944357	0.901008		37.875	0.943003	0.902509
37.925	0.944651	0.903187		37.925	0.944981	0.898955		37.925	0.944638	0.901291		37.925	0.943594	0.902793
37.975	0.944972	0.903826		37.975	0.944976	0.899175		37.975	0.944963	0.901551		37.975	0.942689	0.903273
38.025	0.945127	0.903766		38.025	0.945415	0.899752		38.025	0.944914	0.902153		38.025	0.944013	0.903452
38.075	0.945433	0.903792		38.075	0.945752	0.899842		38.075	0.945367	0.902005		38.075	0.944069	0.90415
38.125	0.945841	0.904895		38.125	0.946139	0.900278		38.125	0.945789	0.90296		38.125	0.94396	0.903394
38.175	0.945557	0.905011		38.175	0.946277	0.900692		38.175	0.945768	0.903116		38.175	0.944573	0.905003
38.225	0.945841	0.905464		38.225	0.946674	0.901049		38.225	0.945821	0.903136		38.225	0.945275	0.904676
38.275	0.946216	0.905296		38.275	0.946362	0.901092		38.275	0.946221	0.903346		38.275	0.945217	0.904758
38.325	0.946586	0.905668		38.325	0.947108	0.901605		38.325	0.946343	0.903963		38.325	0.944891	0.905386
38.375	0.946555	0.906302		38.375	0.947266	0.901997		38.375	0.946485	0.904454		38.375	0.946308	0.90727
38.425	0.946963	0.906483		38.425	0.94744	0.9023		38.425	0.947082	0.904965		38.425	0.945402	0.906734
38.475	0.947001	0.906636		38.475	0.948123	0.902975		38.475	0.947197	0.905595		38.475	0.946639	0.906115
38.525	0.947534	0.90669		38.525	0.948053	0.903321		38.525	0.947678	0.905507		38.525	0.94674	0.906644
38.575	0.947691	0.907449		38.575	0.948058	0.903522		38.575	0.947603	0.905927		38.575	0.946282	0.907009
38.625	0.948469	0.907825		38.625	0.949125	0.903854		38.625	0.948229	0.906325		38.625	0.946804	0.907315
38.675	0.948581	0.908032		38.675	0.948991	0.904058		38.675	0.948405	0.906943		38.675	0.947999	0.907942
38.725	0.949082	0.908343		38.725	0.948819	0.904478		38.725	0.948405	0.907289		38.725	0.947607	0.908124
38.775	0.948901	0.908809		38.775	0.949345	0.904939		38.775	0.948552	0.907266		38.775	0.948193	0.908269
38.825	0.94909	0.909185		38.825	0.949629	0.905087		38.825	0.949087	0.907466		38.825	0.947835	0.908974
38.875	0.949322	0.909467		38.875	0.950016	0.905431		38.875	0.949161	0.908036		38.875	0.948003	0.909346
38.925	0.949093	0.909592		38.925	0.949809	0.9055		38.925	0.949327	0.908161		38.925	0.948512	0.909377
38.975	0.949619	0.910231		38.975	0.950143	0.90652		38.975	0.949701	0.908727		38.975	0.948757	0.909961
39.025	0.949861	0.910356		39.025	0.950465	0.906413		39.025	0.949899	0.909225		39.025	0.948846	0.910569
39.075	0.95017	0.910693		39.075	0.950824	0.906714		39.075	0.950121	0.909778		39.075	0.949431	0.910794
39.125	0.950398	0.910784		39.125	0.951175	0.90707		39.125	0.950838	0.90987		39.125	0.948763	0.912021
39.175	0.950747	0.91112		39.175	0.951261	0.907339		39.175	0.950543	0.910104		39.175	0.949152	0.911578
39.225	0.950786	0.91149		39.225	0.951521	0.907551		39.225	0.951196	0.910197		39.225	0.95068	0.912361
39.275	0.951036	0.912008		39.275	0.951385	0.907913		39.275	0.951261	0.910775		39.275	0.949962	0.912087
39.325	0.951219	0.911832		39.325	0.952098	0.908259		39.325	0.95128	0.911058		39.325	0.950372	0.913262
39.375	0.951391	0.912505		39.375	0.951872	0.908809		39.375	0.951326	0.911465		39.375	0.949882	0.913063
39.425	0.951823	0.912964		39.425	0.952268	0.908976		39.425	0.952044	0.911744		39.425	0.951547	0.91235
39.475	0.951928	0.913265		39.475	0.952756	0.909481		39.475	0.951685	0.912217		39.475	0.951142	0.913064
39.525	0.952283	0.913546		39.525	0.953095	0.909516		39.525	0.952334	0.91248		39.525	0.951371	0.914256
39.575	0.952582	0.913693		39.575	0.953161	0.910266		39.575	0.952588	0.912693		39.575	0.951683	0.913703
39.625	0.952657	0.914207		39.625	0.953694	0.910641		39.625	0.952797	0.913358		39.625	0.950757	0.914716
39.675	0.952774	0.91455		39.675	0.953574	0.910764		39.675	0.952771	0.913817		39.675	0.951886	0.914821
39.725	0.95287	0.915072		39.725	0.953854	0.911229		39.725	0.95316	0.913977		39.725	0.951456	0.915123
39.775	0.953251	0.914708		39.775	0.954221	0.911066		39.775	0.953491	0.91433		39.775	0.952384	0.915458
39.825	0.953274	0.915337		39.825	0.954543	0.912019		39.825	0.954012	0.914807		39.825	0.952281	0.915824
39.875	0.954145	0.915272		39.875	0.954592	0.912062		39.875	0.954029	0.915035		39.875	0.952929	0.916076
39.925	0.954022	0.916065		39.925	0.954885	0.912239		39.925	0.954206	0.915452		39.925	0.952527	0.917037
39.975	0.954228	0.916192		39.975	0.954809	0.912911		39.975	0.954138	0.915702		39.975	0.953064	0.917014
40.025	0.954238	0.916684		40.025	0.955207	0.913229		40.025	0.954743	0.91594		40.025	0.953576	0.917265
40.075	0.954316	0.917003		40.075	0.955306	0.91353		40.075	0.954776	0.916351		40.075	0.953271	0.918159
40.125	0.955226	0.917428		40.125	0.955955	0.913809		40.125	0.955139	0.916607		40.125	0.953385	0.918309
40.175	0.954964	0.917497		40.175	0.955628	0.914018		40.175	0.955146	0.917175		40.175	0.955228	0.918315
40.225	0.955062	0.918		40.225	0.956141	0.914135		40.225	0.95525	0.917196		40.225	0.953505	0.918231
40.275	0.955538	0.918319		40.275	0.956254	0.914702		40.275	0.956036	0.918017		40.275	0.954862	0.919077
40.325	0.955229	0.91856		40.325	0.956368	0.91514		40.325	0.95598	0.918198		40.325	0.954159	0.919117
40.375	0.955742	0.918383		40.375	0.956702	0.915391		40.375	0.956413	0.918792		40.375	0.95477	0.919569
40.425	0.956068	0.919014		40.425	0.957152	0.915495		40.425	0.956461	0.918579		40.425	0.954738	0.91993
40.475	0.956282	0.919422		40.475	0.957203	0.915906		40.475	0.956549	0.919211		40.475	0.955764	0.920274
40.525	0.956288	0.919483		40.525	0.95736	0.916225		40.525	0.956605	0.919045		40.525	0.954792	0.920193
40.575	0.956572	0.920107		40.575	0.957508	0.916583		40.575	0.957062	0.91982		40.575	0.955882	0.920394
40.625	0.956834	0.920217		40.625	0.958084	0.91717		40.625	0.957345	0.920097		40.625	0.956281	0.920843
40.675	0.957018	0.920554		40.675	0.957974	0.917354		40.675	0.957233	0.920782		40.675	0.956381	0.920981
40.725	0.957146	0.920514		40.725	0.958416	0.917704		40.725	0.957737	0.92096		40.725	0.956062	0.921277
40.775	0.957255	0.921223		40.775	0.958189	0.918007		40.775	0.957429	0.921001		40.775	0.956051	0.921795
40.825	0.957606	0.921378		40.825	0.958971	0.918335		40.825	0.957789	0.921266		40.825	0.956786	0.922186
40.875	0.957676	0.921438		40.875	0.958591	0.918623		40.875	0.95787	0.921519		40.875	0.956592	0.923019
40.925	0.958008	0.922125		40.925	0.959141	0.918813		40.925	0.958343	0.922074		40.925	0.957246	0.923222
40.975	0.958074	0.92227		40.975	0.958859	0.91959		40.975	0.958227	0.922947		40.975	0.957483	0.92241
41.025	0.958475	0.923023		41.025	0.959715	0.919695		41.025	0.958718	0.923071		41.025	0.957945	0.923144
41.075	0.958421	0.92307		41.075	0.95972	0.919965		41.075	0.958733	0.923219		41.075	0.957569	0.923949
41.125	0.958845	0.923149		41.125	0.959919	0.920316		41.125	0.959022	0.923389		41.125	0.957929	0.925592
41.175	0.959259	0.923305		41.175	0.960198	0.920391		41.175	0.959495	0.92381		41.175	0.957802	0.924516
41.225	0.959058	0.923879		41.225	0.960369	0.921034		41.225	0.959405	0.92401		41.225	0.958991	0.92395
41.275	0.959412	0.92384		41.275	0.960464	0.921083		41.275	0.959659	0.924407		41.275	0.957986	0.926431
41.325	0.959629	0.924084		41.325	0.960716	0.921377		41.325	0.959953	0.924622		41.325	0.957844	0.92549
41.375	0.960166	0.92422		41.375	0.96118	0.921949		41.375	0.960364	0.925078		41.375	0.9584	0.926306
41.425	0.959804	0.924761		41.425	0.961002	0.922199		41.425	0.960649	0.925647		41.425	0.959256	0.92567
41.475	0.960301	0.924885		41.475	0.961585	0.922333		41.475	0.960523	0.925559		41.475	0.959282	0.926851
41.525	0.960169	0.925371		41.525	0.961565	0.922619		41.525	0.960702	0.925986		41.525	0.959154	0.926772
41.575	0.960815	0.924978		41.575	0.96181	0.922909		41.575	0.96109	0.926131		41.575	0.958771	0.926618
41.625	0.960523	0.926354		41.625	0.962013	0.923459		41.625	0.961172	0.926567		41.625	0.959236	0.926824
41.675	0.961372	0.925994		41.675	0.962341	0.923611		41.675	0.961526	0.926737		41.675	0.960537	0.926961
41.725	0.961083	0.926295		41.725	0.962279	0.923997		41.725	0.96155	0.92706		41.725	0.959613	0.928176
41.775	0.961345	0.926777		41.775	0.96232	0.924371		41.775	0.961953	0.927502		41.775	0.960184	0.929011
41.825	0.961728	0.926712		41.825	0.962868	0.924484		41.825	0.962144	0.927722		41.825	0.961105	0.92916
41.875	0.961625	0.927266		41.875	0.962836	0.925059		41.875	0.962308	0.928201		41.875	0.961788	0.928523
41.925	0.961832	0.927613		41.925	0.963389	0.925342		41.925	0.962378	0.928332		41.925	0.96094	0.930083
41.975	0.96232	0.927684		41.975	0.963189	0.925375		41.975	0.962341	0.928634		41.975	0.96114	0.92905
42.025	0.962505	0.928463		42.025	0.963543	0.925806		42.025	0.962899	0.928919		42.025	0.961609	0.929714
42.075	0.96215	0.928369		42.075	0.963283	0.925981		42.075	0.962622	0.929287		42.075	0.961471	0.930034
42.125	0.962629	0.928821		42.125	0.963742	0.926376		42.125	0.963207	0.929615		42.125	0.961448	0.929755
42.175	0.963053	0.929081		42.175	0.964056	0.92673		42.175	0.96311	0.929728		42.175	0.962478	0.930731
42.225	0.963043	0.929148		42.225	0.964038	0.926861		42.225	0.963506	0.930019		42.225	0.961682	0.930488
42.275	0.963154	0.929627		42.275	0.964445	0.927464		42.275	0.963835	0.930325		42.275	0.96251	0.930023
42.325	0.963441	0.930138		42.325	0.964524	0.927789		42.325	0.964112	0.930646		42.325	0.962308	0.930987
42.375	0.963848	0.930211		42.375	0.965158	0.92773		42.375	0.964367	0.931081		42.375	0.96229	0.932747
42.425	0.963399	0.930316		42.425	0.964935	0.928203		42.425	0.964327	0.931464		42.425	0.963635	0.931361
42.475	0.963852	0.930799		42.475	0.965434	0.928658		42.475	0.964763	0.931965		42.475	0.962612	0.932423
42.525	0.963893	0.930874		42.525	0.96553	0.928698		42.525	0.964722	0.931837		42.525	0.962492	0.931363
42.575	0.964359	0.931525		42.575	0.965727	0.928843		42.575	0.964783	0.932611		42.575	0.963661	0.932882
42.625	0.964402	0.931478		42.625	0.966014	0.929772		42.625	0.964882	0.933065		42.625	0.963925	0.933547
42.675	0.965003	0.931724		42.675	0.965826	0.929827		42.675	0.964941	0.933176		42.675	0.964406	0.933776
42.725	0.964683	0.932571		42.725	0.966044	0.930193		42.725	0.964983	0.933465		42.725	0.964438	0.933692
42.775	0.964748	0.932138		42.775	0.965964	0.930384		42.775	0.965107	0.933558		42.775	0.964136	0.933805
42.825	0.96493	0.932551		42.825	0.966183	0.930757		42.825	0.965684	0.933628		42.825	0.964569	0.93404
42.875	0.965262	0.93293		42.875	0.966945	0.93081		42.875	0.965904	0.934044		42.875	0.964131	0.934161
42.925	0.965536	0.933231		42.925	0.96709	0.931133		42.925	0.966177	0.934242		42.925	0.964369	0.934006
42.975	0.965585	0.933576		42.975	0.967007	0.931362		42.975	0.9659	0.93465		42.975	0.964513	0.93384
43.025	0.965755	0.934292		43.025	0.967138	0.931927		43.025	0.966184	0.935048		43.025	0.965	0.93534
43.075	0.965717	0.934204		43.075	0.967385	0.932251		43.075	0.966409	0.935049		43.075	0.964913	0.935355
43.125	0.966095	0.934632		43.125	0.967786	0.932528		43.125	0.966514	0.935701		43.125	0.965009	0.936427
43.175	0.966179	0.934782		43.175	0.967755	0.932847		43.175	0.966892	0.935864		43.175	0.966124	0.936401
43.225	0.966398	0.93481		43.225	0.96793	0.933007		43.225	0.966782	0.936196		43.225	0.965895	0.936247
43.275	0.966586	0.935143		43.275	0.96823	0.93334		43.275	0.967097	0.936196		43.275	0.965653	0.937198
43.325	0.966934	0.935416		43.325	0.968155	0.933744		43.325	0.967477	0.936981		43.325	0.966641	0.93681
43.375	0.967012	0.935869		43.375	0.968457	0.933819		43.375	0.967797	0.937011		43.375	0.965927	0.936623
43.425	0.967108	0.936123		43.425	0.968587	0.934119		43.425	0.967762	0.937525		43.425	0.966345	0.937257
43.475	0.967403	0.936225		43.475	0.968863	0.934405		43.475	0.967874	0.937398		43.475	0.966459	0.937292
43.525	0.967448	0.93637		43.525	0.968886	0.934784		43.525	0.967834	0.938213		43.525	0.966025	0.937662
43.575	0.967795	0.936945		43.575	0.969155	0.934927		43.575	0.9682	0.938059		43.575	0.966767	0.938701
43.625	0.967909	0.936978		43.625	0.969645	0.9351		43.625	0.96877	0.9382		43.625	0.966495	0.939244
43.675	0.96825	0.937276		43.675	0.969749	0.935763		43.675	0.968861	0.938752		43.675	0.967018	0.939047
43.725	0.968322	0.937709		43.725	0.969827	0.936316		43.725	0.968977	0.939044		43.725	0.967224	0.939824
43.775	0.968496	0.937993		43.775	0.97	0.936615		43.775	0.968994	0.939361		43.775	0.967183	0.93933
43.825	0.96881	0.93839		43.825	0.97007	0.93679		43.825	0.968921	0.939598		43.825	0.967287	0.939369
43.875	0.968943	0.938338		43.875	0.970293	0.936877		43.875	0.969439	0.939745		43.875	0.968161	0.93928
43.925	0.968473	0.938546		43.925	0.969983	0.936925		43.925	0.969243	0.939711		43.925	0.968575	0.940098
43.975	0.968879	0.939248		43.975	0.97034	0.937315		43.975	0.969626	0.940524		43.975	0.967862	0.939934
44.025	0.969009	0.938937		44.025	0.970755	0.93766		44.025	0.970018	0.940633		44.025	0.967866	0.940356
44.075	0.969108	0.939975		44.075	0.970543	0.938174		44.075	0.96986	0.941033		44.075	0.968737	0.942066
44.125	0.96994	0.939861		44.125	0.971238	0.938198		44.125	0.970253	0.941148		44.125	0.968891	0.941619
44.175	0.969894	0.93996		44.175	0.97095	0.938441		44.175	0.970403	0.941471		44.175	0.968643	0.94148
44.225	0.969847	0.940373		44.225	0.971335	0.938914		44.225	0.970937	0.941743		44.225	0.968589	0.941244
44.275	0.97015	0.940486		44.275	0.971469	0.939182		44.275	0.970735	0.941884		44.275	0.969476	0.941932
44.325	0.970108	0.940817		44.325	0.9717	0.939387		44.325	0.971053	0.94218		44.325	0.969268	0.941644
44.375	0.970231	0.941304		44.375	0.971708	0.939783		44.375	0.97095	0.942591		44.375	0.96833	0.942008
44.425	0.970493	0.941513		44.425	0.971978	0.939943		44.425	0.971356	0.942983		44.425	0.969525	0.942596
44.475	0.970197	0.941526		44.475	0.972246	0.940053		44.475	0.971302	0.942657		44.475	0.96981	0.943401
44.525	0.970475	0.941966		44.525	0.972149	0.940488		44.525	0.971284	0.943433		44.525	0.970609	0.944017
44.575	0.970535	0.942373		44.575	0.972207	0.940674		44.575	0.971541	0.94363		44.575	0.970313	0.94368
44.625	0.971457	0.94251		44.625	0.972658	0.941281		44.625	0.972026	0.943997		44.625	0.970418	0.944377
44.675	0.971188	0.942615		44.675	0.972582	0.941622		44.675	0.971757	0.944334		44.675	0.971012	0.943193
44.725	0.971507	0.942707		44.725	0.972867	0.941691		44.725	0.972257	0.944374		44.725	0.970795	0.944821
44.775	0.971385	0.943281		44.775	0.972917	0.942086		44.775	0.972085	0.944747		44.775	0.970416	0.944916
44.825	0.971806	0.9432		44.825	0.973416	0.942171		44.825	0.972521	0.944893		44.825	0.970497	0.945232
44.875	0.971739	0.94414		44.875	0.973555	0.9425		44.875	0.972505	0.945388		44.875	0.971446	0.945177
44.925	0.971953	0.943876		44.925	0.973286	0.942793		44.925	0.972638	0.945603		44.925	0.971491	0.945719
44.975	0.972379	0.944246		44.975	0.973801	0.943161		44.975	0.972861	0.945642		44.975	0.971216	0.945852
45.025	0.971968	0.944528		45.025	0.973797	0.943172		45.025	0.97286	0.945847		45.025	0.971076	0.946098
45.075	0.9726	0.944536		45.075	0.97385	0.943479		45.075	0.973217	0.945969		45.075	0.972332	0.945878
45.125	0.97235	0.944937		45.125	0.973951	0.943809		45.125	0.973152	0.946518		45.125	0.971825	0.947347
45.175	0.972682	0.945172		45.175	0.973951	0.943791		45.175	0.973539	0.946372		45.175	0.9711	0.947646
45.225	0.972615	0.945553		45.225	0.974148	0.944577		45.225	0.973619	0.947318		45.225	0.972043	0.946263
45.275	0.97299	0.945764		45.275	0.974459	0.944599		45.275	0.973523	0.947357		45.275	0.971898	0.947051
45.325	0.973334	0.945956		45.325	0.974612	0.944659		45.325	0.973601	0.947429		45.325	0.972376	0.947957
45.375	0.973544	0.946399		45.375	0.974667	0.945378		45.375	0.974073	0.948034		45.375	0.972423	0.94821
45.425	0.973543	0.946498		45.425	0.97478	0.945412		45.425	0.974242	0.948235		45.425	0.973096	0.9485
45.475	0.97354	0.946611		45.475	0.975006	0.945707		45.475	0.974186	0.948243		45.475	0.973215	0.948804
45.525	0.973682	0.946817		45.525	0.975496	0.946194		45.525	0.97455	0.948341		45.525	0.973817	0.947993
45.575	0.97385	0.9474		45.575	0.975244	0.946508		45.575	0.97428	0.948812		45.575	0.97405	0.949507
45.625	0.974068	0.947727		45.625	0.975579	0.946464		45.625	0.97452	0.949151		45.625	0.974007	0.9498
45.675	0.974116	0.947738		45.675	0.975758	0.946889		45.675	0.974999	0.949529		45.675	0.97366	0.949817
45.725	0.974614	0.947993		45.725	0.975825	0.947023		45.725	0.974986	0.949678		45.725	0.973793	0.948951
45.775	0.974207	0.948307		45.775	0.976054	0.947148		45.775	0.974876	0.949759		45.775	0.974191	0.94991
45.825	0.974676	0.948808		45.825	0.976176	0.947648		45.825	0.975307	0.950276		45.825	0.974095	0.95071
45.875	0.974938	0.948882		45.875	0.976203	0.948063		45.875	0.975456	0.950345		45.875	0.973683	0.950165
45.925	0.974837	0.949154		45.925	0.976369	0.948154		45.925	0.975745	0.950699		45.925	0.974667	0.95072
45.975	0.975111	0.949444		45.975	0.976535	0.948187		45.975	0.975761	0.95083		45.975	0.974265	0.951756
46.025	0.975131	0.949654		46.025	0.976783	0.948346		46.025	0.975959	0.951019		46.025	0.974167	0.951575
46.075	0.975647	0.950151		46.075	0.977048	0.94862		46.075	0.976337	0.95144		46.075	0.974505	0.951636
46.125	0.975508	0.949709		46.125	0.977124	0.949037		46.125	0.976234	0.951555		46.125	0.97473	0.951318
46.175	0.975724	0.9503		46.175	0.977063	0.949375		46.175	0.97648	0.951668		46.175	0.975158	0.951679
46.225	0.975664	0.950388		46.225	0.977404	0.949539		46.225	0.976492	0.952153		46.225	0.975727	0.952292
46.275	0.976025	0.950994		46.275	0.977523	0.949978		46.275	0.976278	0.952406		46.275	0.975649	0.952439
46.325	0.976032	0.950685		46.325	0.977261	0.950341		46.325	0.976471	0.952537		46.325	0.975405	0.95257
46.375	0.976435	0.951217		46.375	0.97796	0.950578		46.375	0.976884	0.952727		46.375	0.974881	0.952337
46.425	0.976439	0.951161		46.425	0.977701	0.950938		46.425	0.976812	0.953005		46.425	0.975765	0.953877
46.475	0.97621	0.951362		46.475	0.977692	0.951133		46.475	0.977358	0.953189		46.475	0.976135	0.953424
46.525	0.976761	0.951995		46.525	0.978103	0.95111		46.525	0.977546	0.953451		46.525	0.976413	0.952987
46.575	0.976593	0.952125		46.575	0.977977	0.951268		46.575	0.977203	0.953742		46.575	0.975765	0.953734
46.625	0.976771	0.952312		46.625	0.978135	0.951838		46.625	0.977101	0.953616		46.625	0.976406	0.953963
46.675	0.976927	0.952756		46.675	0.978204	0.952035		46.675	0.977596	0.954247		46.675	0.976388	0.953603
46.725	0.977265	0.952734		46.725	0.978279	0.952083		46.725	0.977929	0.954352		46.725	0.976494	0.953836
46.775	0.977211	0.953063		46.775	0.978653	0.952425		46.775	0.977832	0.954765		46.775	0.975712	0.955122
46.825	0.977548	0.953111		46.825	0.978823	0.952623		46.825	0.978057	0.954916		46.825	0.976788	0.954908
46.875	0.977256	0.953769		46.875	0.978666	0.953168		46.875	0.977929	0.95517		46.875	0.9769	0.955105
46.925	0.977701	0.953807		46.925	0.979228	0.95291		46.925	0.978207	0.955348		46.925	0.977205	0.955616
46.975	0.977734	0.953717		46.975	0.979291	0.953529		46.975	0.978502	0.955408		46.975	0.976819	0.95524
47.025	0.977881	0.953995		47.025	0.979395	0.953491		47.025	0.978745	0.955552		47.025	0.977271	0.956711
47.075	0.978222	0.95469		47.075	0.979672	0.95402		47.075	0.97875	0.955995		47.075	0.977487	0.956107
47.125	0.978331	0.954484		47.125	0.979494	0.954173		47.125	0.979067	0.956631		47.125	0.977891	0.95671
47.175	0.977839	0.954968		47.175	0.979786	0.954666		47.175	0.979116	0.956652		47.175	0.977804	0.956413
47.225	0.97862	0.954968		47.225	0.979422	0.954465		47.225	0.978774	0.956812		47.225	0.978019	0.957901
47.275	0.978698	0.955349		47.275	0.979863	0.954983		47.275	0.979214	0.957074		47.275	0.979028	0.957094
47.325	0.978869	0.955529		47.325	0.980282	0.955084		47.325	0.979366	0.957505		47.325	0.977813	0.956694
47.375	0.978929	0.955664		47.375	0.980291	0.955436		47.375	0.979575	0.95736		47.375	0.97867	0.958009
47.425	0.978349	0.955837		47.425	0.980356	0.955549		47.425	0.979534	0.957438		47.425	0.979113	0.957618
47.475	0.97891	0.955783		47.475	0.98062	0.955868		47.475	0.979808	0.957875		47.475	0.978292	0.958308
47.525	0.978865	0.956006		47.525	0.980532	0.955922		47.525	0.979835	0.958118		47.525	0.97908	0.958014
47.575	0.979009	0.956716		47.575	0.980737	0.956317		47.575	0.98024	0.958447		47.575	0.978309	0.958896
47.625	0.979245	0.957115		47.625	0.98089	0.956658		47.625	0.980519	0.958931		47.625	0.979253	0.95912
47.675	0.979532	0.957062		47.675	0.980873	0.956966		47.675	0.980401	0.958992		47.675	0.979976	0.959054
47.725	0.979168	0.957468		47.725	0.980921	0.956897		47.725	0.980451	0.958923		47.725	0.980184	0.959369
47.775	0.980001	0.957799		47.775	0.98122	0.957171		47.775	0.980686	0.959123		47.775	0.979207	0.958795
47.825	0.979749	0.957798		47.825	0.981056	0.957738		47.825	0.980724	0.959402		47.825	0.97965	0.959933
47.875	0.98004	0.958019		47.875	0.981395	0.957639		47.875	0.980944	0.95953		47.875	0.979885	0.960373
47.925	0.979971	0.957546		47.925	0.981364	0.957968		47.925	0.980587	0.959758		47.925	0.979209	0.9603
47.975	0.980226	0.958441		47.975	0.981772	0.958253		47.975	0.981246	0.960441		47.975	0.979867	0.960796
48.025	0.980255	0.9584		48.025	0.981906	0.958507		48.025	0.981418	0.960418		48.025	0.979978	0.95968
48.075	0.980463	0.959092		48.075	0.982172	0.958622		48.075	0.981603	0.960655		48.075	0.979896	0.96049
48.125	0.980457	0.959381		48.125	0.982066	0.959062		48.125	0.981401	0.96097		48.125	0.980103	0.961264
48.175	0.98098	0.959443		48.175	0.982201	0.959342		48.175	0.981548	0.961358		48.175	0.980211	0.960135
48.225	0.9812	0.959469		48.225	0.982194	0.959479		48.225	0.981711	0.961446		48.225	0.980251	0.961962
48.275	0.981081	0.960118		48.275	0.982399	0.959863		48.275	0.981788	0.961417		48.275	0.980093	0.961932
48.325	0.980891	0.960327		48.325	0.982541	0.959944		48.325	0.981927	0.961909		48.325	0.980425	0.962221
48.375	0.981374	0.960018		48.375	0.982394	0.960056		48.375	0.982084	0.961954		48.375	0.980384	0.962088
48.425	0.981093	0.960252		48.425	0.982612	0.960255		48.425	0.982177	0.962414		48.425	0.980834	0.962382
48.475	0.98127	0.960387		48.475	0.982883	0.96069		48.475	0.982333	0.962294		48.475	0.980865	0.96297
48.525	0.981198	0.960778		48.525	0.982903	0.960855		48.525	0.98245	0.962593		48.525	0.981084	0.963654
48.575	0.981752	0.960933		48.575	0.983017	0.961147		48.575	0.982393	0.962656		48.575	0.981421	0.962846
48.625	0.981608	0.961141		48.625	0.98319	0.961411		48.625	0.982662	0.963023		48.625	0.981446	0.962885
48.675	0.981882	0.961439		48.675	0.983409	0.961797		48.675	0.982946	0.963368		48.675	0.981722	0.963444
48.725	0.982069	0.961856		48.725	0.983318	0.961913		48.725	0.983184	0.963686		48.725	0.981527	0.964122
48.775	0.982156	0.961967		48.775	0.983773	0.962184		48.775	0.982937	0.963575		48.775	0.981353	0.96396
48.825	0.982287	0.962038		48.825	0.983721	0.96241		48.825	0.983454	0.964157		48.825	0.981841	0.963768
48.875	0.982512	0.962235		48.875	0.983873	0.962758		48.875	0.983356	0.964176		48.875	0.982467	0.964544
48.925	0.982146	0.962336		48.925	0.983893	0.962478		48.925	0.98296	0.964214		48.925	0.981935	0.96474
48.975	0.98272	0.962788		48.975	0.984078	0.963116		48.975	0.983582	0.964659		48.975	0.982016	0.964762
49.025	0.982464	0.962763		49.025	0.984085	0.963075		49.025	0.983718	0.964586		49.025	0.982318	0.964984
49.075	0.982833	0.963061		49.075	0.984111	0.963267		49.075	0.983794	0.964921		49.075	0.982132	0.964933
49.125	0.98297	0.963236		49.125	0.984469	0.963414		49.125	0.983782	0.965181		49.125	0.982581	0.965401
49.175	0.983339	0.96322		49.175	0.984642	0.963357		49.175	0.984158	0.965059		49.175	0.982228	0.965901
49.225	0.983176	0.963294		49.225	0.98448	0.963742		49.225	0.9839	0.965446		49.225	0.983256	0.965897
49.275	0.983555	0.963707		49.275	0.984907	0.9641		49.275	0.98428	0.965496		49.275	0.983026	0.965293
49.325	0.983331	0.964218		49.325	0.984888	0.964273		49.325	0.984556	0.965842		49.325	0.983132	0.966757
49.375	0.983944	0.964243		49.375	0.985338	0.964731		49.375	0.984732	0.96614		49.375	0.983925	0.966433
49.425	0.983944	0.964846		49.425	0.985107	0.964812		49.425	0.984693	0.966352		49.425	0.983903	0.966435
49.475	0.983762	0.964811		49.475	0.985555	0.96514		49.475	0.984704	0.966434		49.475	0.983633	0.966841
49.525	0.983713	0.964659		49.525	0.98533	0.965363		49.525	0.984689	0.966879		49.525	0.983539	0.967125
49.575	0.983831	0.965039		49.575	0.985289	0.965635		49.575	0.985035	0.96703		49.575	0.983262	0.967334
49.625	0.984342	0.965343		49.625	0.985664	0.96566		49.625	0.985312	0.967226		49.625	0.983165	0.967861
49.675	0.983763	0.965552		49.675	0.985384	0.965968		49.675	0.985051	0.967501		49.675	0.983849	0.967968
49.725	0.983993	0.965699		49.725	0.985509	0.966185		49.725	0.98521	0.967378		49.725	0.984079	0.967707
49.775	0.984501	0.965961		49.775	0.985748	0.966214		49.775	0.985475	0.967714		49.775	0.984135	0.968481
49.825	0.984476	0.96621		49.825	0.986059	0.966578		49.825	0.985601	0.968037		49.825	0.984678	0.968166
49.875	0.984653	0.966353		49.875	0.986164	0.966635		49.875	0.985603	0.968372		49.875	0.983966	0.968621
49.925	0.984383	0.966666		49.925	0.986059	0.967147		49.925	0.985684	0.968602		49.925	0.984511	0.968764
49.975	0.984847	0.966367		49.975	0.98617	0.966835		49.975	0.985587	0.968301		49.975	0.984117	0.968945
50.025	0.984864	0.966746		50.025	0.986183	0.967224		50.025	0.986199	0.96887		50.025	0.984178	0.96874
50.075	0.984672	0.967174		50.075	0.986392	0.967493		50.075	0.985548	0.968868		50.075	0.98419	0.96934
50.125	0.985399	0.966961		50.125	0.9866	0.96775		50.125	0.986126	0.96931		50.125	0.985146	0.969388
50.175	0.984986	0.967241		50.175	0.986855	0.967909		50.175	0.986176	0.969348		50.175	0.984551	0.968965
50.225	0.985397	0.967481		50.225	0.986815	0.968085		50.225	0.986345	0.969513		50.225	0.984953	0.969855
50.275	0.984985	0.968001		50.275	0.986673	0.968585		50.275	0.986257	0.970005		50.275	0.984683	0.9701
50.325	0.985776	0.968207		50.325	0.987146	0.968438		50.325	0.986846	0.969867		50.325	0.9858	0.970672
50.375	0.985993	0.968338		50.375	0.987478	0.968981		50.375	0.98721	0.970526		50.375	0.985576	0.970203
50.425	0.985996	0.968503		50.425	0.987278	0.96895		50.425	0.986656	0.970223		50.425	0.98572	0.971035
50.475	0.985823	0.968625		50.475	0.987233	0.969025		50.475	0.986963	0.970326		50.475	0.98515	0.971529
50.525	0.986075	0.968895		50.525	0.987331	0.969477		50.525	0.986982	0.97058		50.525	0.985357	0.971481
50.575	0.986212	0.969167		50.575	0.987651	0.969771		50.575	0.98706	0.971189		50.575	0.986311	0.971271
50.625	0.986233	0.969447		50.625	0.9876	0.969971		50.625	0.987664	0.971064		50.625	0.986229	0.971841
50.675	0.986162	0.969553		50.675	0.987767	0.970216		50.675	0.98728	0.971554		50.675	0.986502	0.971868
50.725	0.986436	0.969858		50.725	0.98775	0.970379		50.725	0.987083	0.971616		50.725	0.986204	0.97279
50.775	0.986845	0.970171		50.775	0.988274	0.970703		50.775	0.987836	0.971904		50.775	0.986349	0.972322
50.825	0.986446	0.970052		50.825	0.987724	0.970612		50.825	0.987795	0.972066		50.825	0.98596	0.972857
50.875	0.987009	0.970296		50.875	0.988269	0.971221		50.875	0.988024	0.972241		50.875	0.986707	0.972722
50.925	0.986648	0.97011		50.925	0.988132	0.971025		50.925	0.988045	0.972343		50.925	0.986597	0.972914
50.975	0.986766	0.970641		50.975	0.988312	0.971158		50.975	0.988111	0.972429		50.975	0.986315	0.972228
51.025	0.986948	0.971054		51.025	0.988509	0.971559		51.025	0.98824	0.972713		51.025	0.986687	0.973137
51.075	0.987031	0.971059		51.075	0.98851	0.971919		51.075	0.988055	0.972784		51.075	0.986337	0.973331
51.125	0.987045	0.971412		51.125	0.988619	0.97232		51.125	0.988439	0.973285		51.125	0.986426	0.973165
51.175	0.987233	0.97135		51.175	0.988637	0.972171		51.175	0.988521	0.973337		51.175	0.986557	0.973929
51.225	0.987122	0.971641		51.225	0.98875	0.972375		51.225	0.988409	0.973848		51.225	0.986743	0.973978
51.275	0.987454	0.971824		51.275	0.988946	0.972596		51.275	0.988454	0.973811		51.275	0.987604	0.974332
51.325	0.987682	0.97202		51.325	0.989117	0.972774		51.325	0.988753	0.973971		51.325	0.98728	0.974495
51.375	0.987531	0.972031		51.375	0.989156	0.972998		51.375	0.988759	0.974115		51.375	0.988136	0.973919
51.425	0.987877	0.97221		51.425	0.988936	0.972977		51.425	0.988646	0.97415		51.425	0.987225	0.974786
51.475	0.987915	0.972651		51.475	0.989484	0.973315		51.475	0.989146	0.974723		51.475	0.987893	0.974784
51.525	0.987908	0.972837		51.525	0.989379	0.973695		51.525	0.989138	0.974567		51.525	0.987641	0.974676
51.575	0.987874	0.972636		51.575	0.989566	0.973599		51.575	0.989347	0.974579		51.575	0.987682	0.975324
51.625	0.988202	0.972838		51.625	0.989812	0.974011		51.625	0.989137	0.974872		51.625	0.988333	0.975447
51.675	0.98786	0.97314		51.675	0.989627	0.974022		51.675	0.989191	0.974946		51.675	0.988194	0.976093
51.725	0.988076	0.973582		51.725	0.989976	0.974292		51.725	0.989472	0.975462		51.725	0.987611	0.976452
51.775	0.988368	0.973574		51.775	0.989948	0.974573		51.775	0.989389	0.975527		51.775	0.987869	0.976283
51.825	0.988318	0.973875		51.825	0.989919	0.974643		51.825	0.989774	0.975619		51.825	0.988141	0.976247
51.875	0.988215	0.974028		51.875	0.989915	0.974891		51.875	0.989611	0.976032		51.875	0.988234	0.977157
51.925	0.988393	0.974502		51.925	0.99027	0.975263		51.925	0.989653	0.976224		51.925	0.988326	0.977103
51.975	0.988704	0.974403		51.975	0.990397	0.9755		51.975	0.990083	0.976532		51.975	0.988734	0.977079
52.025	0.988916	0.974411		52.025	0.990253	0.975395		52.025	0.990183	0.976645		52.025	0.989039	0.977147
52.075	0.988942	0.975067		52.075	0.990505	0.975769		52.075	0.990171	0.97662		52.075	0.988694	0.977444
52.125	0.989215	0.974907		52.125	0.990364	0.97604		52.125	0.990361	0.976975		52.125	0.988779	0.977589
52.175	0.989155	0.975108		52.175	0.990452	0.975972		52.175	0.990549	0.977174		52.175	0.989133	0.977577
52.225	0.989226	0.975082		52.225	0.990699	0.976255		52.225	0.990587	0.977327		52.225	0.989493	0.978505
52.275	0.989381	0.975594		52.275	0.990542	0.976344		52.275	0.990547	0.977174		52.275	0.988554	0.978329
52.325	0.989356	0.975679		52.325	0.990876	0.976433		52.325	0.990722	0.977303		52.325	0.988557	0.978656
52.375	0.989557	0.975848		52.375	0.990934	0.97685		52.375	0.990635	0.977603		52.375	0.988504	0.978659
52.425	0.989859	0.975736		52.425	0.991028	0.97693		52.425	0.990761	0.977844		52.425	0.989479	0.978717
52.475	0.989713	0.976196		52.475	0.990945	0.977266		52.475	0.991118	0.978214		52.475	0.988841	0.979584
52.525	0.9897	0.976381		52.525	0.991313	0.977468		52.525	0.991193	0.978219		52.525	0.989005	0.979173
52.575	0.989796	0.976379		52.575	0.99129	0.977557		52.575	0.991032	0.978645		52.575	0.989489	0.979445
52.625	0.989846	0.976744		52.625	0.991254	0.97781		52.625	0.99126	0.978585		52.625	0.990183	0.979534
52.675	0.989936	0.976795		52.675	0.991272	0.977604		52.675	0.991135	0.978681		52.675	0.989772	0.979516
52.725	0.990057	0.977085		52.725	0.991657	0.978073		52.725	0.991521	0.978912		52.725	0.989729	0.980497
52.775	0.989723	0.977225		52.775	0.991471	0.978384		52.775	0.99164	0.979179		52.775	0.989682	0.980311
52.825	0.989967	0.977679		52.825	0.99165	0.97859		52.825	0.991441	0.979102		52.825	0.990302	0.980217
52.875	0.990535	0.977703		52.875	0.991633	0.978657		52.875	0.991839	0.979462		52.875	0.99024	0.980305
52.925	0.990216	0.977911		52.925	0.991638	0.978971		52.925	0.991714	0.979518		52.925	0.989749	0.980528
52.975	0.990351	0.978088		52.975	0.992293	0.97907		52.975	0.992019	0.979755		52.975	0.989627	0.980645
53.025	0.990567	0.977815		53.025	0.992098	0.978972		53.025	0.991733	0.979786		53.025	0.990321	0.980494
53.075	0.990657	0.978546		53.075	0.99223	0.979537		53.075	0.992246	0.980321		53.075	0.989824	0.981541
53.125	0.99062	0.978629		53.125	0.992249	0.979543		53.125	0.991983	0.980261		53.125	0.990592	0.98091
53.175	0.990833	0.978462		53.175	0.992254	0.979622		53.175	0.992036	0.980252		53.175	0.990966	0.981495
53.225	0.991236	0.978963		53.225	0.992603	0.980005		53.225	0.99243	0.980613		53.225	0.99104	0.98134
53.275	0.991117	0.979098		53.275	0.992665	0.9802		53.275	0.992309	0.980758		53.275	0.990798	0.981962
53.325	0.991197	0.978949		53.325	0.992681	0.980101		53.325	0.99243	0.980952		53.325	0.990294	0.981894
53.375	0.991024	0.979368		53.375	0.992314	0.980406		53.375	0.992244	0.981318		53.375	0.991246	0.981826
53.425	0.991207	0.979597		53.425	0.99295	0.980626		53.425	0.992442	0.981214		53.425	0.99137	0.982691
53.475	0.991705	0.979756		53.475	0.992762	0.980911		53.475	0.992644	0.981429		53.475	0.991236	0.981926
53.525	0.991621	0.980001		53.525	0.992858	0.980902		53.525	0.992578	0.981676		53.525	0.991092	0.982207
53.575	0.991638	0.979964		53.575	0.993031	0.981143		53.575	0.992858	0.981827		53.575	0.991438	0.982515
53.625	0.991299	0.980351		53.625	0.992974	0.981336		53.625	0.992691	0.981812		53.625	0.990766	0.98224
53.675	0.991382	0.980025		53.675	0.993033	0.98124		53.675	0.992872	0.982066		53.675	0.991478	0.983389
53.725	0.991841	0.98055		53.725	0.993683	0.981515		53.725	0.993271	0.982164		53.725	0.990944	0.982775
53.775	0.991736	0.980689		53.775	0.993191	0.981802		53.775	0.99322	0.982375		53.775	0.992018	0.983289
53.825	0.991675	0.9809		53.825	0.99325	0.981987		53.825	0.992929	0.982574		53.825	0.991727	0.983477
53.875	0.991684	0.981035		53.875	0.993442	0.982388		53.875	0.993094	0.98286		53.875	0.991508	0.982714
53.925	0.992011	0.981092		53.925	0.993438	0.982252		53.925	0.993252	0.983055		53.925	0.99201	0.984041
53.975	0.992194	0.98122		53.975	0.993873	0.982618		53.975	0.993476	0.983181		53.975	0.99202	0.984123
54.025	0.991924	0.981394		54.025	0.993683	0.982562		54.025	0.993511	0.983138		54.025	0.992253	0.984404
54.075	0.992322	0.981684		54.075	0.993963	0.982895		54.075	0.993609	0.983533		54.075	0.991991	0.984409
54.125	0.992205	0.981939		54.125	0.993964	0.983058		54.125	0.993498	0.983454		54.125	0.992263	0.984316
54.175	0.992142	0.981927		54.175	0.993976	0.983258		54.175	0.993543	0.983686		54.175	0.992704	0.984506
54.225	0.992583	0.982281		54.225	0.994313	0.9835		54.225	0.994162	0.984137		54.225	0.991711	0.985576
54.275	0.992722	0.982163		54.275	0.994138	0.98354		54.275	0.993929	0.983995		54.275	0.991772	0.985417
54.325	0.992378	0.982644		54.325	0.993961	0.983564		54.325	0.99404	0.984079		54.325	0.992679	0.984943
54.375	0.992552	0.982418		54.375	0.994276	0.983836		54.375	0.994056	0.984487		54.375	0.992545	0.985402
54.425	0.992486	0.98254		54.425	0.994277	0.984088		54.425	0.99421	0.984409		54.425	0.992935	0.985873
54.475	0.993026	0.983013		54.475	0.994573	0.984288		54.475	0.994395	0.984839		54.475	0.992735	0.985756
54.525	0.992961	0.982919		54.525	0.994345	0.984274		54.525	0.994539	0.984508		54.525	0.992868	0.985773
54.575	0.993056	0.982969		54.575	0.994442	0.984627		54.575	0.994389	0.984922		54.575	0.993059	0.986389
54.625	0.992824	0.983151		54.625	0.994638	0.984855		54.625	0.994365	0.985365		54.625	0.993068	0.986222
54.675	0.993134	0.983437		54.675	0.99487	0.984927		54.675	0.994531	0.985427		54.675	0.992418	0.986579
54.725	0.993179	0.984034		54.725	0.994923	0.985351		54.725	0.994245	0.98569		54.725	0.993259	0.986426
54.775	0.993309	0.984101		54.775	0.994663	0.985326		54.775	0.994742	0.985563		54.775	0.992571	0.98713
54.825	0.993512	0.983882		54.825	0.995114	0.985294		54.825	0.99454	0.985694		54.825	0.992941	0.987517
54.875	0.993592	0.984302		54.875	0.995467	0.985692		54.875	0.995092	0.986094		54.875	0.992911	0.987059
54.925	0.993509	0.984389		54.925	0.995159	0.985736		54.925	0.994919	0.986106		54.925	0.99356	0.987269
54.975	0.993537	0.984368		54.975	0.995276	0.985792		54.975	0.994904	0.985982		54.975	0.993954	0.987605
55.025	0.993508	0.9844		55.025	0.995476	0.985956		55.025	0.995084	0.98629		55.025	0.993426	0.988268
55.075	0.993721	0.9848		55.075	0.995148	0.985875		55.075	0.995113	0.9863		55.075	0.993	0.988298
55.125	0.99373	0.984856		55.125	0.995329	0.986356		55.125	0.994877	0.986548		55.125	0.993709	0.988441
55.175	0.993847	0.984925		55.175	0.995544	0.986462		55.175	0.99518	0.987069		55.175	0.994628	0.987661
55.225	0.993945	0.985587		55.225	0.995434	0.986883		55.225	0.99528	0.987248		55.225	0.994089	0.987756
55.275	0.993936	0.985267		55.275	0.99565	0.986777		55.275	0.995321	0.987266		55.275	0.994295	0.987782
55.325	0.994175	0.985491		55.325	0.995509	0.987051		55.325	0.995023	0.987292		55.325	0.993505	0.988149
55.375	0.994198	0.985642		55.375	0.99608	0.98717		55.375	0.995501	0.987313		55.375	0.993978	0.988821
55.425	0.994167	0.986089		55.425	0.995828	0.987455		55.425	0.995588	0.987856		55.425	0.99438	0.988527
55.475	0.994274	0.986123		55.475	0.996157	0.987635		55.475	0.99553	0.987876		55.475	0.99429	0.988935
55.525	0.994421	0.985978		55.525	0.995846	0.98783		55.525	0.995801	0.988178		55.525	0.993885	0.988878
55.575	0.99434	0.986306		55.575	0.996041	0.987885		55.575	0.995757	0.988054		55.575	0.993985	0.989314
55.625	0.994441	0.986429		55.625	0.99634	0.988045		55.625	0.995996	0.988021		55.625	0.994153	0.989083
55.675	0.994305	0.986314		55.675	0.996323	0.988109		55.675	0.996098	0.988431		55.675	0.994487	0.989664
55.725	0.994505	0.986861		55.725	0.996252	0.988374		55.725	0.99609	0.988236		55.725	0.995207	0.990178
55.775	0.99458	0.986971		55.775	0.99648	0.988634		55.775	0.996051	0.98908		55.775	0.995208	0.989842
55.825	0.994684	0.986975		55.825	0.996621	0.988616		55.825	0.996178	0.988601		55.825	0.994677	0.990184
55.875	0.994894	0.987032		55.875	0.99651	0.988566		55.875	0.996121	0.988862		55.875	0.994396	0.989844
55.925	0.994868	0.987044		55.925	0.99663	0.988853		55.925	0.996381	0.988961		55.925	0.994912	0.990278
55.975	0.994855	0.987463		55.975	0.996707	0.989068		55.975	0.996413	0.98954		55.975	0.994879	0.990131
56.025	0.994862	0.987648		56.025	0.996579	0.989075		56.025	0.99653	0.989114		56.025	0.995082	0.990562
56.075	0.995081	0.987992		56.075	0.99661	0.989432		56.075	0.996281	0.989774		56.075	0.995142	0.990698
56.125	0.995047	0.987827		56.125	0.996847	0.989486		56.125	0.996567	0.989908		56.125	0.995285	0.991139
56.175	0.99528	0.988102		56.175	0.996933	0.989757		56.175	0.996627	0.989948		56.175	0.994967	0.990567
56.225	0.995294	0.988218		56.225	0.997313	0.990239		56.225	0.996879	0.990044		56.225	0.995124	0.991286
56.275	0.99525	0.988256		56.275	0.997054	0.990038		56.275	0.996789	0.990144		56.275	0.996054	0.991582
56.325	0.995569	0.98866		56.325	0.997086	0.990111		56.325	0.997124	0.990249		56.325	0.995403	0.991126
56.375	0.995935	0.988461		56.375	0.997573	0.990338		56.375	0.997025	0.990363		56.375	0.995749	0.991888
56.425	0.995236	0.988726		56.425	0.997193	0.990224		56.425	0.996839	0.990534		56.425	0.995102	0.992158
56.475	0.995423	0.988916		56.475	0.99743	0.990557		56.475	0.997017	0.991066		56.475	0.995729	0.99228
56.525	0.995607	0.988854		56.525	0.997482	0.99084		56.525	0.997066	0.990906		56.525	0.995561	0.991435
56.575	0.995563	0.98933		56.575	0.997494	0.990951		56.575	0.996803	0.991162		56.575	0.995272	0.992457
56.625	0.995717	0.989473		56.625	0.997561	0.991021		56.625	0.99714	0.990823		56.625	0.995968	0.992031
56.675	0.995742	0.989435		56.675	0.997643	0.991009		56.675	0.997576	0.991131		56.675	0.995292	0.992125
56.725	0.995952	0.98962		56.725	0.998023	0.99152		56.725	0.997402	0.991325		56.725	0.996385	0.992623
56.775	0.99626	0.989412		56.775	0.997734	0.991329		56.775	0.997389	0.991371		56.775	0.996012	0.99252
56.825	0.995893	0.989686		56.825	0.997587	0.991542		56.825	0.997399	0.991581		56.825	0.996903	0.992695
56.875	0.996246	0.989724		56.875	0.99782	0.991769		56.875	0.997303	0.991893		56.875	0.996276	0.993609
56.925	0.996022	0.990338		56.925	0.997672	0.992006		56.925	0.997379	0.991935		56.925	0.996279	0.992839
56.975	0.996372	0.990296		56.975	0.997771	0.992157		56.975	0.997576	0.991941		56.975	0.996426	0.993233
57.025	0.996086	0.990517		57.025	0.997947	0.992095		57.025	0.997595	0.992354		57.025	0.995778	0.993244
57.075	0.996285	0.990724		57.075	0.998014	0.992451		57.075	0.997503	0.992416		57.075	0.996325	0.993512
57.125	0.996454	0.990523		57.125	0.998144	0.992538		57.125	0.997997	0.99223		57.125	0.996373	0.994441
57.175	0.996453	0.990707		57.175	0.998295	0.992378		57.175	0.997996	0.992509		57.175	0.996251	0.993917
57.225	0.996464	0.991285		57.225	0.998388	0.992944		57.225	0.998093	0.993133		57.225	0.996247	0.993947
57.275	0.996701	0.991413		57.275	0.998347	0.99302		57.275	0.997953	0.992988		57.275	0.997551	0.994603
57.325	0.996677	0.991345		57.325	0.998418	0.993149		57.325	0.997983	0.992959		57.325	0.996477	0.99404
57.375	0.996788	0.991079		57.375	0.99865	0.993015		57.375	0.998074	0.993012		57.375	0.996371	0.994353
57.425	0.996695	0.991547		57.425	0.998671	0.993433		57.425	0.998025	0.993316		57.425	0.996411	0.993988
57.475	0.997243	0.991552		57.475	0.998726	0.993362		57.475	0.998226	0.993338		57.475	0.996983	0.995027
57.525	0.997063	0.9917		57.525	0.998695	0.993462		57.525	0.998216	0.993688		57.525	0.996847	0.993962
57.575	0.997207	0.991972		57.575	0.998751	0.993912		57.575	0.998453	0.993753		57.575	0.996268	0.994991
57.625	0.997298	0.991811		57.625	0.99892	0.993835		57.625	0.998504	0.9938		57.625	0.996796	0.995035
57.675	0.997089	0.991829		57.675	0.998642	0.993979		57.675	0.998228	0.993924		57.675	0.997338	0.995058
57.725	0.99712	0.992407		57.725	0.998758	0.994142		57.725	0.998476	0.994222		57.725	0.997855	0.994896
57.775	0.997021	0.992269		57.775	0.998858	0.994097		57.775	0.998351	0.994164		57.775	0.997372	0.995598
57.825	0.997052	0.992616		57.825	0.998944	0.994579		57.825	0.998606	0.994416		57.825	0.997364	0.996471
57.875	0.997203	0.99226		57.875	0.999239	0.994364		57.875	0.998498	0.994576		57.875	0.997117	0.996094
57.925	0.99735	0.992937		57.925	0.99912	0.994766		57.925	0.998693	0.994754		57.925	0.997447	0.99566
57.975	0.997356	0.992825		57.975	0.99921	0.994835		57.975	0.998665	0.994748		57.975	0.997642	0.996284
58.025	0.997226	0.992694		58.025	0.998903	0.994909		58.025	0.998665	0.994909		58.025	0.997688	0.996138
58.075	0.997614	0.993114		58.075	0.999252	0.995017		58.075	0.998599	0.99521		58.075	0.997491	0.995664
58.125	0.997611	0.992627		58.125	0.999526	0.995114		58.125	0.999249	0.995138		58.125	0.998051	0.995821
58.175	0.997591	0.993343		58.175	0.999132	0.995225		58.175	0.99881	0.995105		58.175	0.997355	0.996315
58.225	0.997714	0.993326		58.225	0.999452	0.995498		58.225	0.99879	0.9955		58.225	0.997652	0.996305
58.275	0.99789	0.993347		58.275	0.999494	0.995284		58.275	0.998913	0.995518		58.275	0.997788	0.996463
58.325	0.997739	0.993346		58.325	0.999592	0.995434		58.325	0.99919	0.995659		58.325	0.998132	0.997032
58.375	0.997799	0.993538		58.375	0.999787	0.995753		58.375	0.999496	0.995699		58.375	0.998223	0.997004
58.425	0.997928	0.993948		58.425	0.999718	0.996099		58.425	0.99946	0.995929		58.425	0.998672	0.997297
58.475	0.9979	0.994075		58.475	0.999428	0.99617		58.475	0.999385	0.99611		58.475	0.997943	0.997116
58.525	0.997885	0.99436		58.525	0.999778	0.996332		58.525	0.999563	0.99612		58.525	0.998625	0.997874
58.575	0.997972	0.99408		58.575	0.999703	0.996316		58.575	0.999422	0.996492		58.575	0.998781	0.997055
58.625	0.998288	0.994225		58.625	0.999753	0.996311		58.625	0.999676	0.996525		58.625	0.998202	0.997694
58.675	0.998343	0.994682		58.675	0.999997	0.996623		58.675	0.99949	0.996629		58.675	0.99891	0.997276
58.725	0.998323	0.994656		58.725	1.00006	0.996676		58.725	0.999582	0.99674		58.725	0.998752	0.997521
58.775	0.998076	0.994589		58.775	0.999835	0.99671		58.775	0.999403	0.996804		58.775	0.998129	0.997741
58.825	0.998374	0.994912		58.825	0.99995	0.997111		58.825	0.9996	0.996821		58.825	0.99864	0.997816
58.875	0.998197	0.995155		58.875	0.999923	0.997115		58.875	0.999521	0.997028		58.875	0.998545	0.998772
58.925	0.99816	0.994824		58.925	0.999911	0.99717		58.925	0.99963	0.997136		58.925	0.997962	0.998283
58.975	0.998425	0.995244		58.975	1.00026	0.997543		58.975	0.999975	0.997619		58.975	0.998844	0.998519
59.025	0.99843	0.995519		59.025	1.00026	0.997289		59.025	0.999912	0.997484		59.025	0.998867	0.998747
59.075	0.998654	0.995532		59.075	1.00043	0.997715		59.075	1.00004	0.997649		59.075	0.998457	0.999217
59.125	0.998515	0.995477		59.125	1.00044	0.997784		59.125	0.999899	0.997715		59.125	0.998558	0.998622
59.175	0.99877	0.9952		59.175	1.00058	0.997655		59.175	1.00007	0.997825		59.175	0.998811	0.998912
59.225	0.998876	0.995568		59.225	1.00042	0.998104		59.225	0.99997	0.998174		59.225	0.998996	0.99904
59.275	0.998599	0.99595		59.275	1.00046	0.998027		59.275	0.999877	0.998016		59.275	0.999124	0.999339
59.325	0.998739	0.995518		59.325	1.0005	0.998156		59.325	1.00009	0.998087		59.325	0.999539	1.00005
59.375	0.998972	0.996229		59.375	1.00078	0.998208		59.375	1.00013	0.998165		59.375	0.999528	0.998747
59.425	0.998989	0.995966		59.425	1.00084	0.99835		59.425	1.00024	0.998271		59.425	0.999647	0.999323
59.475	0.99899	0.995998		59.475	1.00066	0.998393		59.475	1.00021	0.998347		59.475	0.999505	0.999679
59.525	0.99936	0.996473		59.525	1.00109	0.998631		59.525	1.00045	0.998496		59.525	0.998998	1.00011
59.575	0.999247	0.996263		59.575	1.00082	0.998766		59.575	1.00036	0.998496		59.575	0.99897	0.999646
59.625	0.999369	0.996578		59.625	1.0009	0.999022		59.625	1.00059	0.998878		59.625	0.998925	0.999856
59.675	0.999234	0.996839		59.675	1.00107	0.999233		59.675	1.00045	0.998787		59.675	0.99942	1.00004
59.725	0.999583	0.996779		59.725	1.00131	0.99938		59.725	1.00063	0.999193		59.725	0.999266	1.00037
59.775	0.999539	0.996963		59.775	1.00119	0.999258		59.775	1.00077	0.999145		59.775	0.999657	1.00038
59.825	0.999283	0.997294		59.825	1.00084	0.999251		59.825	1.00065	0.999243		59.825	1.00026	1.00022
59.875	0.999516	0.99701		59.875	1.00101	0.999324		59.875	1.00086	0.999135		59.875	0.999653	1.00079
59.925	0.9996	0.997024		59.925	1.00109	0.999621		59.925	1.00101	0.99945		59.925	0.999644	1.00077
59.975	0.999925	0.997566		59.975	1.00136	0.999887		59.975	1.00086	0.999838		59.975	0.999754	1.00127
60.025	0.999556	0.997181		60.025	1.00134	0.999873		60.025	1.00076	0.999862		60.025	1.00014	1.00104
