# Supplementary material for: Direct and indirect salt effects on homotypic phase separation
Source: eLife. 2024 Nov 12;13:RP100282. doi: 10.7554/eLife.100282 (PMC11556789; doi:10.7554/eLife.100282)
Supplement: Figure 5—source data 1. [file elife-100282-fig5-data1.xlsx]

## Sheet: Figure 5
A													E		g(r)
	“Inter” contacts per chain													Distance (Å)	50mM	1000mM
Interaction Type	50 mM	stdev	150 mM	stdev	300 mM	stdev	500 mM	stdev	1000 mM	stdev				0.025	0	0
Salt-bridge	0.990841	0.151521	1.35622	0.289972	0.828269	0.276745	0.968987	0.175148	0.997701	0.114879				0.075	0	0
Cation-π	4.4967	0.495719	5.72901	0.783441	3.75136	0.946978	5.34424	0.264947	5.25718	0.898805				0.125	0	0
π-π	8.09146	1.02465	9.20076	1.35924	7.52806	2.6072	9.6478	0.393956	10.1661	1.45468				0.175	0	0
Amino-π	5.92448	0.592456	7.6767	0.393963	6.0003	1.90087	7.6959	0.328022	8.25938	0.899377				0.225	0	0
														0.275	0	0
														0.325	0	0
														0.375	0	0
														0.425	0	0
														0.475	0	0
														0.525	0	0
														0.575	0	0
														0.625	0	0
														0.675	0	0
														0.725	0	0
														0.775	0	0
														0.825	0	0
														0.875	0	0
														0.925	0	0
														0.975	0	0
														1.025	0	0
														1.075	0	0
														1.125	0	0
														1.175	0	0
														1.225	0	0
														1.275	0	0
														1.325	0	0
														1.375	0	0
														1.425	0	0
														1.475	0	0
														1.525	0	0
														1.575	0	0
														1.625	0	0
														1.675	0	0
														1.725	0	0
														1.775	2.63e-05	1.53e-05
														1.825	5.81e-05	5.69e-05
														1.875	0.000208633	0.00015987
														1.925	0.000445652	0.000380247
														1.975	0.0011781	0.00119605
														2.025	0.00238336	0.00190711
														2.075	0.00370891	0.00361333
														2.125	0.00611491	0.00547679
														2.175	0.00833059	0.00749871
														2.225	0.0105025	0.00988843
														2.275	0.0129968	0.0115706
														2.325	0.0159754	0.0143493
														2.375	0.0184256	0.0170528
														2.425	0.0208776	0.0188125
														2.475	0.0237172	0.0212272
														2.525	0.02653	0.0233084
														2.575	0.0295566	0.0256596
														2.625	0.0314531	0.0278131
														2.675	0.0341811	0.0298776
														2.725	0.038292	0.0333175
														2.775	0.0424948	0.0371975
														2.825	0.0469452	0.0414981
														2.875	0.0531215	0.0464651
														2.925	0.0611369	0.0539223
														2.975	0.0719549	0.0633061
														3.025	0.085196	0.0748193
														3.075	0.101183	0.090398
														3.125	0.119649	0.106493
														3.175	0.141513	0.127002
														3.225	0.164607	0.148456
														3.275	0.189985	0.172996
														3.325	0.21734	0.198415
														3.375	0.246122	0.224266
														3.425	0.273417	0.251955
														3.475	0.30052	0.275402
														3.525	0.323488	0.297601
														3.575	0.341478	0.313918
														3.625	0.355208	0.325724
														3.675	0.3637	0.331844
														3.725	0.368256	0.336703
														3.775	0.367303	0.337356
														3.825	0.36743	0.336372
														3.875	0.367335	0.336673
														3.925	0.368608	0.338247
														3.975	0.36732	0.337368
														4.025	0.369039	0.337421
														4.075	0.36946	0.340628
														4.125	0.374162	0.343697
														4.175	0.37852	0.345356
														4.225	0.379605	0.348031
														4.275	0.380961	0.351861
														4.325	0.386173	0.353893
														4.375	0.389658	0.357257
														4.425	0.392629	0.3604
														4.475	0.394406	0.364723
														4.525	0.399856	0.366889
														4.575	0.401813	0.372468
														4.625	0.405095	0.37506
														4.675	0.409575	0.379245
														4.725	0.412441	0.383002
														4.775	0.41684	0.386613
														4.825	0.418281	0.388741
														4.875	0.422456	0.391076
														4.925	0.424059	0.39275
														4.975	0.423304	0.393997
														5.025	0.425628	0.392916
														5.075	0.42351	0.392963
														5.125	0.420759	0.390803
														5.175	0.42031	0.38792
														5.225	0.419064	0.389399
														5.275	0.418696	0.387487
														5.325	0.418253	0.388538
														5.375	0.418431	0.387889
														5.425	0.420774	0.390816
														5.475	0.422533	0.391607
														5.525	0.424852	0.394214
														5.575	0.428629	0.398681
														5.625	0.43238	0.401701
														5.675	0.43754	0.406187
														5.725	0.443197	0.412539
														5.775	0.447679	0.417091
														5.825	0.45413	0.423339
														5.875	0.459636	0.428377
														5.925	0.464681	0.433319
														5.975	0.469039	0.436222
														6.025	0.47131	0.438159
														6.075	0.475084	0.441121
														6.125	0.475792	0.442238
														6.175	0.477009	0.443016
														6.225	0.477898	0.444888
														6.275	0.479755	0.446203
														6.325	0.480544	0.445593
														6.375	0.480302	0.448283
														6.425	0.482372	0.447247
														6.475	0.483786	0.44952
														6.525	0.485118	0.450302
														6.575	0.486635	0.450608
														6.625	0.487343	0.452717
														6.675	0.489614	0.453418
														6.725	0.489007	0.454482
														6.775	0.491638	0.455505
														6.825	0.492503	0.456315
														6.875	0.493315	0.45728
														6.925	0.494282	0.460242
														6.975	0.497532	0.461754
														7.025	0.500652	0.463647
														7.075	0.501891	0.465486
														7.125	0.503127	0.467039
														7.175	0.50668	0.469572
														7.225	0.508754	0.471875
														7.275	0.512338	0.473674
														7.325	0.515218	0.477073
														7.375	0.516908	0.479289
														7.425	0.519714	0.481961
														7.475	0.522742	0.484321
														7.525	0.524273	0.485281
														7.575	0.526298	0.487963
														7.625	0.529564	0.48924
														7.675	0.530654	0.491824
														7.725	0.533135	0.493123
														7.775	0.535074	0.49564
														7.825	0.536262	0.497064
														7.875	0.538551	0.498714
														7.925	0.540987	0.500255
														7.975	0.543064	0.502426
														8.025	0.544518	0.505211
														8.075	0.546574	0.506204
														8.125	0.547433	0.506446
														8.175	0.549535	0.508336
														8.225	0.551195	0.51059
														8.275	0.552531	0.512106
														8.325	0.553882	0.513325
														8.375	0.555505	0.515318
														8.425	0.557489	0.515432
														8.475	0.557538	0.517883
														8.525	0.559599	0.519054
														8.575	0.56067	0.520355
														8.625	0.562187	0.521667
														8.675	0.563497	0.522166
														8.725	0.564288	0.5235
														8.775	0.565158	0.525055
														8.825	0.566197	0.525717
														8.875	0.568314	0.526422
														8.925	0.569755	0.528034
														8.975	0.570331	0.528385
														9.025	0.571051	0.529981
														9.075	0.57164	0.530654
														9.125	0.573001	0.532614
														9.175	0.574245	0.533954
														9.225	0.576525	0.534231
														9.275	0.576528	0.535249
														9.325	0.577775	0.536319
														9.375	0.57915	0.537941
														9.425	0.581212	0.539021
														9.475	0.581599	0.540558
														9.525	0.582559	0.542231
														9.575	0.583944	0.542989
														9.625	0.585923	0.545016
														9.675	0.587343	0.545672
														9.725	0.588617	0.546523
														9.775	0.591312	0.548678
														9.825	0.592106	0.549997
														9.875	0.592224	0.551631
														9.925	0.5948	0.552552
														9.975	0.595964	0.555057
														10.025	0.598375	0.555603
														10.075	0.600698	0.55833
														10.125	0.601806	0.559214
														10.175	0.603845	0.560897
														10.225	0.605012	0.56239
														10.275	0.605885	0.563873
														10.325	0.607789	0.565364
														10.375	0.609705	0.566453
														10.425	0.611226	0.568163
														10.475	0.612293	0.569358
														10.525	0.613573	0.571061
														10.575	0.614886	0.572493
														10.625	0.616178	0.574166
														10.675	0.618727	0.575492
														10.725	0.619714	0.576555
														10.775	0.621284	0.578401
														10.825	0.622416	0.579201
														10.875	0.623833	0.580714
														10.925	0.62509	0.582304
														10.975	0.627471	0.582754
														11.025	0.628339	0.584344
														11.075	0.629039	0.585015
														11.125	0.630773	0.586884
														11.175	0.632257	0.588293
														11.225	0.63341	0.589636
														11.275	0.633759	0.590261
														11.325	0.636217	0.592085
														11.375	0.636862	0.593059
														11.425	0.638597	0.59432
														11.475	0.639939	0.595356
														11.525	0.641169	0.597054
														11.575	0.6416	0.597556
														11.625	0.642533	0.599039
														11.675	0.644659	0.6
														11.725	0.645718	0.600741
														11.775	0.64717	0.601827
														11.825	0.648367	0.603206
														11.875	0.649211	0.604171
														11.925	0.650675	0.605884
														11.975	0.65156	0.606542
														12.025	0.652677	0.607575
														12.075	0.654019	0.608816
														12.125	0.655364	0.609542
														12.175	0.656881	0.611183
														12.225	0.657481	0.611402
														12.275	0.658165	0.612746
														12.325	0.659274	0.61364
														12.375	0.66029	0.614624
														12.425	0.662022	0.615523
														12.475	0.662821	0.616441
														12.525	0.664181	0.61679
														12.575	0.664892	0.618126
														12.625	0.666656	0.619486
														12.675	0.667008	0.620553
														12.725	0.668768	0.621343
														12.775	0.669871	0.621946
														12.825	0.670386	0.623046
														12.875	0.671749	0.623818
														12.925	0.672203	0.625103
														12.975	0.6738	0.625692
														13.025	0.674696	0.626586
														13.075	0.676059	0.627317
														13.125	0.676471	0.627976
														13.175	0.677473	0.629695
														13.225	0.679037	0.630675
														13.275	0.679859	0.631665
														13.325	0.681412	0.632479
														13.375	0.681598	0.634008
														13.425	0.683058	0.634171
														13.475	0.683135	0.63513
														13.525	0.685027	0.636045
														13.575	0.685558	0.637589
														13.625	0.68652	0.637849
														13.675	0.688762	0.638996
														13.725	0.688978	0.639628
														13.775	0.689941	0.640901
														13.825	0.69157	0.642453
														13.875	0.692623	0.642596
														13.925	0.693223	0.643781
														13.975	0.694106	0.6453
														14.025	0.694989	0.645984
														14.075	0.696744	0.647145
														14.125	0.697556	0.647635
														14.175	0.698588	0.649283
														14.225	0.700431	0.649942
														14.275	0.701526	0.651045
														14.325	0.702379	0.651973
														14.375	0.702801	0.652875
														14.425	0.704418	0.65386
														14.475	0.704922	0.655393
														14.525	0.706167	0.655925
														14.575	0.707419	0.657046
														14.625	0.708015	0.657435
														14.675	0.709112	0.65872
														14.725	0.710242	0.659944
														14.775	0.7106	0.660359
														14.825	0.711904	0.661306
														14.875	0.712726	0.662342
														14.925	0.713788	0.662974
														14.975	0.714566	0.664403
														15.025	0.715579	0.665216
														15.075	0.716752	0.666374
														15.125	0.717116	0.667163
														15.175	0.718193	0.66753
														15.225	0.71884	0.66883
														15.275	0.720042	0.670036
														15.325	0.720958	0.670764
														15.375	0.721822	0.671714
														15.425	0.722572	0.67251
														15.475	0.723533	0.672961
														15.525	0.724237	0.673988
														15.575	0.72552	0.674615
														15.625	0.725832	0.675404
														15.675	0.726898	0.676534
														15.725	0.727601	0.677497
														15.775	0.728216	0.67838
														15.825	0.729108	0.679362
														15.875	0.730772	0.679831
														15.925	0.730695	0.681028
														15.975	0.731641	0.68153
														16.025	0.732508	0.682413
														16.075	0.733769	0.683544
														16.125	0.734573	0.683583
														16.175	0.735248	0.684689
														16.225	0.735656	0.685625
														16.275	0.736818	0.686353
														16.325	0.737213	0.687056
														16.375	0.738401	0.687733
														16.425	0.739225	0.688814
														16.475	0.739835	0.68922
														16.525	0.740389	0.690047
														16.575	0.741374	0.690598
														16.625	0.742208	0.691515
														16.675	0.743356	0.692368
														16.725	0.743558	0.693692
														16.775	0.744991	0.694194
														16.825	0.745105	0.694999
														16.875	0.746248	0.695657
														16.925	0.746782	0.696647
														16.975	0.747483	0.697282
														17.025	0.748335	0.697684
														17.075	0.749077	0.698653
														17.125	0.749863	0.699618
														17.175	0.750593	0.700533
														17.225	0.751486	0.700654
														17.275	0.752224	0.701563
														17.325	0.753168	0.702033
														17.375	0.753748	0.702875
														17.425	0.754225	0.703864
														17.475	0.755243	0.704685
														17.525	0.756361	0.705197
														17.575	0.75722	0.705328
														17.625	0.75809	0.706902
														17.675	0.758558	0.707425
														17.725	0.759463	0.707853
														17.775	0.759308	0.70882
														17.825	0.760359	0.709554
														17.875	0.761257	0.709807
														17.925	0.761789	0.710943
														17.975	0.763198	0.711407
														18.025	0.763266	0.712123
														18.075	0.763955	0.713088
														18.125	0.764845	0.713573
														18.175	0.765633	0.714584
														18.225	0.766581	0.715113
														18.275	0.766735	0.716053
														18.325	0.767724	0.717072
														18.375	0.768297	0.717722
														18.425	0.768993	0.717851
														18.475	0.769648	0.719232
														18.525	0.770337	0.719464
														18.575	0.771042	0.720442
														18.625	0.772396	0.721062
														18.675	0.772747	0.721529
														18.725	0.773369	0.722651
														18.775	0.774013	0.723107
														18.825	0.774711	0.723848
														18.875	0.775274	0.723936
														18.925	0.776057	0.724874
														18.975	0.777086	0.725334
														19.025	0.777345	0.726841
														19.075	0.77777	0.727306
														19.125	0.778553	0.72796
														19.175	0.779004	0.728413
														19.225	0.780265	0.729242
														19.275	0.781283	0.729884
														19.325	0.781471	0.730137
														19.375	0.781893	0.730888
														19.425	0.783106	0.731964
														19.475	0.783256	0.732469
														19.525	0.784411	0.732881
														19.575	0.785039	0.733889
														19.625	0.785247	0.734469
														19.675	0.786095	0.735367
														19.725	0.786333	0.736109
														19.775	0.787574	0.735964
														19.825	0.787884	0.73739
														19.875	0.788917	0.737532
														19.925	0.789083	0.738225
														19.975	0.790091	0.738872
														20.025	0.790914	0.739837
														20.075	0.791353	0.740334
														20.125	0.79175	0.741082
														20.175	0.792521	0.741993
														20.225	0.793153	0.742496
														20.275	0.79383	0.742595
														20.325	0.794384	0.743683
														20.375	0.795147	0.743731
														20.425	0.795732	0.744888
														20.475	0.796417	0.745498
														20.525	0.796961	0.74603
														20.575	0.797709	0.746443
														20.625	0.79838	0.746872
														20.675	0.798925	0.748053
														20.725	0.799132	0.749059
														20.775	0.800417	0.748966
														20.825	0.801129	0.74995
														20.875	0.800977	0.75072
														20.925	0.802249	0.751145
														20.975	0.80251	0.751717
														21.025	0.803296	0.75273
														21.075	0.804079	0.752863
														21.125	0.804173	0.753682
														21.175	0.804742	0.754289
														21.225	0.805785	0.754867
														21.275	0.806419	0.755361
														21.325	0.807082	0.756057
														21.375	0.807435	0.7563
														21.425	0.808048	0.75719
														21.475	0.808968	0.757968
														21.525	0.809469	0.75837
														21.575	0.809988	0.759249
														21.625	0.809969	0.759779
														21.675	0.81091	0.760668
														21.725	0.811861	0.761028
														21.775	0.812284	0.761849
														21.825	0.813178	0.762072
														21.875	0.813611	0.76258
														21.925	0.813871	0.763698
														21.975	0.814475	0.764082
														22.025	0.815408	0.764574
														22.075	0.81579	0.764963
														22.125	0.816264	0.766226
														22.175	0.817506	0.766549
														22.225	0.817107	0.767334
														22.275	0.818185	0.767765
														22.325	0.819314	0.768057
														22.375	0.819368	0.768648
														22.425	0.820242	0.769496
														22.475	0.820699	0.769699
														22.525	0.821023	0.770422
														22.575	0.821182	0.771438
														22.625	0.822279	0.771588
														22.675	0.822605	0.772391
														22.725	0.823319	0.772572
														22.775	0.823508	0.773187
														22.825	0.824375	0.773861
														22.875	0.82483	0.774211
														22.925	0.825387	0.775346
														22.975	0.826274	0.775596
														23.025	0.826876	0.776208
														23.075	0.827006	0.776946
														23.125	0.827942	0.777222
														23.175	0.828047	0.778331
														23.225	0.828914	0.778465
														23.275	0.829483	0.778778
														23.325	0.830055	0.779288
														23.375	0.830939	0.77983
														23.425	0.831292	0.78031
														23.475	0.831702	0.780789
														23.525	0.832265	0.781436
														23.575	0.832808	0.78228
														23.625	0.833004	0.782414
														23.675	0.83384	0.783249
														23.725	0.83456	0.783893
														23.775	0.834667	0.783985
														23.825	0.83553	0.784625
														23.875	0.836074	0.785064
														23.925	0.836622	0.785734
														23.975	0.837153	0.786117
														24.025	0.837794	0.786578
														24.075	0.8382	0.787169
														24.125	0.838701	0.787629
														24.175	0.839381	0.78802
														24.225	0.839787	0.788752
														24.275	0.840308	0.788883
														24.325	0.840996	0.790074
														24.375	0.841316	0.790345
														24.425	0.841891	0.790679
														24.475	0.842133	0.791384
														24.525	0.842885	0.79195
														24.575	0.84329	0.792686
														24.625	0.844008	0.79313
														24.675	0.844522	0.793705
														24.725	0.844943	0.793901
														24.775	0.845361	0.793952
														24.825	0.846277	0.79471
														24.875	0.846829	0.795286
														24.925	0.847541	0.795847
														24.975	0.847691	0.796024
														25.025	0.848188	0.796704
														25.075	0.848576	0.797278
														25.125	0.849043	0.797596
														25.175	0.849928	0.798302
														25.225	0.850258	0.798777
														25.275	0.851085	0.799089
														25.325	0.851302	0.799679
														25.375	0.852064	0.800101
														25.425	0.852252	0.800826
														25.475	0.853005	0.801282
														25.525	0.853505	0.801698
														25.575	0.854027	0.802015
														25.625	0.854552	0.802673
														25.675	0.855137	0.803075
														25.725	0.855706	0.80359
														25.775	0.855653	0.804286
														25.825	0.856739	0.804708
														25.875	0.85733	0.805235
														25.925	0.857457	0.805509
														25.975	0.857928	0.806315
														26.025	0.858668	0.806497
														26.075	0.85898	0.807266
														26.125	0.859301	0.807408
														26.175	0.859849	0.808205
														26.225	0.860651	0.808697
														26.275	0.860943	0.809131
														26.325	0.861438	0.809499
														26.375	0.862091	0.810048
														26.425	0.86241	0.81069
														26.475	0.862514	0.811164
														26.525	0.863467	0.811288
														26.575	0.86397	0.811995
														26.625	0.864594	0.812445
														26.675	0.865237	0.812663
														26.725	0.865648	0.813323
														26.775	0.865623	0.813561
														26.825	0.866618	0.81405
														26.875	0.866729	0.814695
														26.925	0.867266	0.814918
														26.975	0.867826	0.815818
														27.025	0.868459	0.816108
														27.075	0.869222	0.816313
														27.125	0.869434	0.817215
														27.175	0.86997	0.81729
														27.225	0.870479	0.817509
														27.275	0.870756	0.818379
														27.325	0.870886	0.818734
														27.375	0.871686	0.819271
														27.425	0.872028	0.819514
														27.475	0.872346	0.820094
														27.525	0.873292	0.820376
														27.575	0.873479	0.820892
														27.625	0.873999	0.821308
														27.675	0.87483	0.821735
														27.725	0.874933	0.821938
														27.775	0.875228	0.822576
														27.825	0.875738	0.823216
														27.875	0.876428	0.823535
														27.925	0.876783	0.824129
														27.975	0.877266	0.824144
														28.025	0.87767	0.824905
														28.075	0.878407	0.825163
														28.125	0.878879	0.825939
														28.175	0.879044	0.826118
														28.225	0.8796	0.826716
														28.275	0.879982	0.826943
														28.325	0.880409	0.827548
														28.375	0.880973	0.827757
														28.425	0.880905	0.828735
														28.475	0.881815	0.829034
														28.525	0.882211	0.829513
														28.575	0.882526	0.829862
														28.625	0.882898	0.830263
														28.675	0.88298	0.830654
														28.725	0.883765	0.830904
														28.775	0.884443	0.831645
														28.825	0.884551	0.832149
														28.875	0.885123	0.832465
														28.925	0.885538	0.832691
														28.975	0.885788	0.833329
														29.025	0.88649	0.833923
														29.075	0.886901	0.834064
														29.125	0.88738	0.834653
														29.175	0.887676	0.834958
														29.225	0.888173	0.835403
														29.275	0.888318	0.836039
														29.325	0.889091	0.836478
														29.375	0.889667	0.836839
														29.425	0.889754	0.837325
														29.475	0.890545	0.837526
														29.525	0.890873	0.838191
														29.575	0.891158	0.838562
														29.625	0.89166	0.839127
														29.675	0.892089	0.839483
														29.725	0.892407	0.840161
														29.775	0.892716	0.840393
														29.825	0.893171	0.840605
														29.875	0.893717	0.841034
														29.925	0.893975	0.841356
														29.975	0.894491	0.84176
														30.025	0.894824	0.842278
														30.075	0.895071	0.842531
														30.125	0.895388	0.843491
														30.175	0.896087	0.843434
														30.225	0.89663	0.844075
														30.275	0.896909	0.844618
														30.325	0.897291	0.845027
														30.375	0.897566	0.84558
														30.425	0.897922	0.845632
														30.475	0.898419	0.846221
														30.525	0.898924	0.846437
														30.575	0.899691	0.846767
														30.625	0.899763	0.847361
														30.675	0.90015	0.847691
														30.725	0.900507	0.848072
														30.775	0.900728	0.848365
														30.825	0.900977	0.848862
														30.875	0.901691	0.849183
														30.925	0.902086	0.849743
														30.975	0.902646	0.850064
														31.025	0.903086	0.850448
														31.075	0.902925	0.851162
														31.125	0.903691	0.851319
														31.175	0.903978	0.851546
														31.225	0.904334	0.852205
														31.275	0.90466	0.852573
														31.325	0.905041	0.853155
														31.375	0.905651	0.853433
														31.425	0.906045	0.85385
														31.475	0.90644	0.854359
														31.525	0.906626	0.854705
														31.575	0.906905	0.854804
														31.625	0.907737	0.855374
														31.675	0.907663	0.855653
														31.725	0.908007	0.856079
														31.775	0.908612	0.856958
														31.825	0.908786	0.856698
														31.875	0.908982	0.857314
														31.925	0.909337	0.85771
														31.975	0.90999	0.85832
														32.025	0.909967	0.858556
														32.075	0.910502	0.859225
														32.125	0.910778	0.859448
														32.175	0.911355	0.859617
														32.225	0.911798	0.859958
														32.275	0.912171	0.860456
														32.325	0.912295	0.860844
														32.375	0.913158	0.861188
														32.425	0.913084	0.861652
														32.475	0.913511	0.861885
														32.525	0.913798	0.862367
														32.575	0.914356	0.862746
														32.625	0.914558	0.863432
														32.675	0.914871	0.863526
														32.725	0.915266	0.86407
														32.775	0.915447	0.864602
														32.825	0.915823	0.864852
														32.875	0.916246	0.865326
														32.925	0.916293	0.865267
														32.975	0.916606	0.865809
														33.025	0.917251	0.865986
														33.075	0.917576	0.866485
														33.125	0.917921	0.867023
														33.175	0.918361	0.867435
														33.225	0.918387	0.867735
														33.275	0.918827	0.868082
														33.325	0.919301	0.868384
														33.375	0.919579	0.868955
														33.425	0.91981	0.86926
														33.475	0.920064	0.869625
														33.525	0.920428	0.870025
														33.575	0.921092	0.870629
														33.625	0.921188	0.870693
														33.675	0.921535	0.870885
														33.725	0.921717	0.871214
														33.775	0.922096	0.871943
														33.825	0.922459	0.872451
														33.875	0.923047	0.872536
														33.925	0.922883	0.872817
														33.975	0.923473	0.872994
														34.025	0.923792	0.873447
														34.075	0.923952	0.873782
														34.125	0.924325	0.874463
														34.175	0.924528	0.874622
														34.225	0.924915	0.875001
														34.275	0.925119	0.875293
														34.325	0.925462	0.875764
														34.375	0.925797	0.875935
														34.425	0.92602	0.876515
														34.475	0.926332	0.877023
														34.525	0.926701	0.877173
														34.575	0.92693	0.877468
														34.625	0.927364	0.877954
														34.675	0.927469	0.878295
														34.725	0.927844	0.878668
														34.775	0.927971	0.879062
														34.825	0.928242	0.879316
														34.875	0.929006	0.879787
														34.925	0.92914	0.880186
														34.975	0.92948	0.880511
														35.025	0.929644	0.880852
														35.075	0.930209	0.881193
														35.125	0.930353	0.881647
														35.175	0.930673	0.882086
														35.225	0.930817	0.882206
														35.275	0.931127	0.882666
														35.325	0.931566	0.883009
														35.375	0.931653	0.883458
														35.425	0.931902	0.883586
														35.475	0.932513	0.88434
														35.525	0.932651	0.884556
														35.575	0.932927	0.884764
														35.625	0.933247	0.885464
														35.675	0.933637	0.885555
														35.725	0.933557	0.885595
														35.775	0.934229	0.886238
														35.825	0.934271	0.886316
														35.875	0.934485	0.88698
														35.925	0.934994	0.88713
														35.975	0.934892	0.887429
														36.025	0.935375	0.888007
														36.075	0.935664	0.888211
														36.125	0.936064	0.888853
														36.175	0.936343	0.8892
														36.225	0.936521	0.889402
														36.275	0.936818	0.889592
														36.325	0.936914	0.889946
														36.375	0.937416	0.890297
														36.425	0.937521	0.890766
														36.475	0.937804	0.891078
														36.525	0.937992	0.891631
														36.575	0.938499	0.891644
														36.625	0.939003	0.892298
														36.675	0.938973	0.892592
														36.725	0.939473	0.892709
														36.775	0.939316	0.893238
														36.825	0.939712	0.893713
														36.875	0.940147	0.893881
														36.925	0.940413	0.894391
														36.975	0.940611	0.894662
														37.025	0.941058	0.895154
														37.075	0.941043	0.895274
														37.125	0.941467	0.895782
														37.175	0.941601	0.896044
														37.225	0.941658	0.896381
														37.275	0.941996	0.896838
														37.325	0.942291	0.897127
														37.375	0.942686	0.897516
														37.425	0.942941	0.897921
														37.475	0.942804	0.898299
														37.525	0.943241	0.898508
														37.575	0.94378	0.899196
														37.625	0.943608	0.899203
														37.675	0.944287	0.899792
														37.725	0.944315	0.900075
														37.775	0.944822	0.9001
														37.825	0.944772	0.900489
														37.875	0.945287	0.9011
														37.925	0.945395	0.901364
														37.975	0.945513	0.901665
														38.025	0.945779	0.902097
														38.075	0.946095	0.902163
														38.125	0.946505	0.90276
														38.175	0.946592	0.903076
														38.225	0.9467	0.903416
														38.275	0.94689	0.903505
														38.325	0.947334	0.903921
														38.375	0.947343	0.904456
														38.425	0.94772	0.904787
														38.475	0.947971	0.905321
														38.525	0.948355	0.905468
														38.575	0.948352	0.905848
														38.625	0.949109	0.906314
														38.675	0.949173	0.906601
														38.725	0.949315	0.906982
														38.775	0.949532	0.907205
														38.825	0.949754	0.907418
														38.875	0.949966	0.907896
														38.925	0.949983	0.907973
														38.975	0.950385	0.908711
														39.025	0.950598	0.908868
														39.075	0.950859	0.909336
														39.125	0.951364	0.909533
														39.175	0.95143	0.909746
														39.225	0.95173	0.909951
														39.275	0.951709	0.910338
														39.325	0.952174	0.910637
														39.375	0.952139	0.911178
														39.425	0.952569	0.911363
														39.475	0.952671	0.911871
														39.525	0.953017	0.912068
														39.575	0.953183	0.912476
														39.625	0.953618	0.912967
														39.675	0.953588	0.913277
														39.725	0.953799	0.913528
														39.775	0.954214	0.913565
														39.825	0.954556	0.91434
														39.875	0.954796	0.914415
														39.925	0.954878	0.914783
														39.975	0.95491	0.915208
														40.025	0.955191	0.915564
														40.075	0.955264	0.915836
														40.125	0.956007	0.916119
														40.175	0.955751	0.916462
														40.225	0.95597	0.916656
														40.275	0.956458	0.917182
														40.325	0.956322	0.917542
														40.375	0.956714	0.917856
														40.425	0.957031	0.917924
														40.475	0.957185	0.918384
														40.525	0.957269	0.91849
														40.575	0.957535	0.919059
														40.625	0.957863	0.91937
														40.675	0.957848	0.919805
														40.725	0.958203	0.920033
														40.775	0.958121	0.920351
														40.825	0.958537	0.920594
														40.875	0.958558	0.920882
														40.925	0.958951	0.921175
														40.975	0.958741	0.921904
														41.025	0.959384	0.922154
														41.075	0.959414	0.922285
														41.125	0.959597	0.922521
														41.175	0.959995	0.922849
														41.225	0.960029	0.923183
														41.275	0.960113	0.923418
														41.325	0.960458	0.923627
														41.375	0.960954	0.924034
														41.425	0.960871	0.924545
														41.475	0.961176	0.924607
														41.525	0.961171	0.92491
														41.575	0.961648	0.925056
														41.625	0.961681	0.925753
														41.675	0.962131	0.925776
														41.725	0.962051	0.926157
														41.775	0.962302	0.92653
														41.825	0.962615	0.926627
														41.875	0.962611	0.9272
														41.925	0.963033	0.927384
														41.975	0.962957	0.927561
														42.025	0.963433	0.928021
														42.075	0.96317	0.928187
														42.125	0.963559	0.928544
														42.175	0.963848	0.928861
														42.225	0.963881	0.929019
														42.275	0.96415	0.929457
														42.325	0.964392	0.929748
														42.375	0.964767	0.929916
														42.425	0.964591	0.930256
														42.475	0.96508	0.93072
														42.525	0.965193	0.930863
														42.575	0.965289	0.931343
														42.625	0.965499	0.931716
														42.675	0.965657	0.93189
														42.725	0.965659	0.932314
														42.775	0.965708	0.932344
														42.825	0.966003	0.932583
														42.875	0.966474	0.932882
														42.925	0.966605	0.933232
														42.975	0.966601	0.933481
														43.025	0.966803	0.934045
														43.075	0.966897	0.934066
														43.125	0.967198	0.934503
														43.175	0.96745	0.934781
														43.225	0.96742	0.935012
														43.275	0.967614	0.935231
														43.325	0.967816	0.93564
														43.375	0.968057	0.9359
														43.425	0.968165	0.936156
														43.475	0.968433	0.936378
														43.525	0.968426	0.936735
														43.575	0.968692	0.936903
														43.625	0.969134	0.937049
														43.675	0.969179	0.937565
														43.725	0.969341	0.938022
														43.775	0.969403	0.938306
														43.825	0.969556	0.938587
														43.875	0.969825	0.938667
														43.925	0.969689	0.938631
														43.975	0.96999	0.939284
														44.025	0.970318	0.939307
														44.075	0.970202	0.939876
														44.125	0.970736	0.940008
														44.175	0.970673	0.940218
														44.225	0.970984	0.940717
														44.275	0.971093	0.940796
														44.325	0.971298	0.941047
														44.375	0.971261	0.941515
														44.425	0.971611	0.941754
														44.475	0.971621	0.941711
														44.525	0.971644	0.942276
														44.575	0.971853	0.942511
														44.625	0.972197	0.942914
														44.675	0.972161	0.943274
														44.725	0.972527	0.943279
														44.775	0.972455	0.943709
														44.825	0.972824	0.943746
														44.875	0.972927	0.944298
														44.925	0.972836	0.944382
														44.975	0.973221	0.944617
														45.025	0.973152	0.944867
														45.075	0.973557	0.944945
														45.125	0.973441	0.945432
														45.175	0.97368	0.945419
														45.225	0.973749	0.946122
														45.275	0.973951	0.946149
														45.325	0.974098	0.946285
														45.375	0.9743	0.946801
														45.425	0.974436	0.947005
														45.475	0.974423	0.947198
														45.525	0.974894	0.947474
														45.575	0.974793	0.947791
														45.625	0.975089	0.947988
														45.675	0.975244	0.948253
														45.725	0.975432	0.948448
														45.775	0.975324	0.948638
														45.825	0.975621	0.949114
														45.875	0.97583	0.949362
														45.925	0.975918	0.949563
														45.975	0.975921	0.949704
														46.025	0.976272	0.949903
														46.075	0.976493	0.950243
														46.125	0.976539	0.950526
														46.175	0.976661	0.950676
														46.225	0.976826	0.950994
														46.275	0.976798	0.951362
														46.325	0.976802	0.951477
														46.375	0.977366	0.95181
														46.425	0.977279	0.951996
														46.475	0.977302	0.952165
														46.525	0.977749	0.952458
														46.575	0.977523	0.952606
														46.625	0.977506	0.952928
														46.675	0.977849	0.95332
														46.725	0.978018	0.95336
														46.775	0.978232	0.953676
														46.825	0.978334	0.953832
														46.875	0.978214	0.954284
														46.925	0.978613	0.954242
														46.975	0.978703	0.954538
														47.025	0.978878	0.954673
														47.075	0.979111	0.955139
														47.125	0.979213	0.955347
														47.175	0.979193	0.955702
														47.225	0.97913	0.955657
														47.275	0.979497	0.9561
														47.325	0.979725	0.956275
														47.375	0.979787	0.956428
														47.425	0.979751	0.956567
														47.475	0.980007	0.956818
														47.525	0.979906	0.957008
														47.575	0.980222	0.957433
														47.625	0.980435	0.957881
														47.675	0.980459	0.958025
														47.725	0.980381	0.958083
														47.775	0.980833	0.958215
														47.825	0.980659	0.958571
														47.875	0.980896	0.958649
														47.925	0.980878	0.958733
														47.975	0.981267	0.959341
														48.025	0.981288	0.959435
														48.075	0.981558	0.959633
														48.125	0.981628	0.95998
														48.175	0.981756	0.960323
														48.225	0.981856	0.960418
														48.275	0.981941	0.960754
														48.325	0.981947	0.960937
														48.375	0.982125	0.960963
														48.425	0.982209	0.961261
														48.475	0.982334	0.961442
														48.525	0.982435	0.961723
														48.575	0.982526	0.961847
														48.625	0.982734	0.96229
														48.675	0.982918	0.962498
														48.725	0.982979	0.962744
														48.775	0.983173	0.962916
														48.825	0.983297	0.9632
														48.875	0.983393	0.96338
														48.925	0.983221	0.963324
														48.975	0.983586	0.96379
														49.025	0.983648	0.963772
														49.075	0.983737	0.96398
														49.125	0.983953	0.964195
														49.175	0.984209	0.964201
														49.225	0.983991	0.964503
														49.275	0.984419	0.964722
														49.325	0.984431	0.965002
														49.375	0.984835	0.96533
														49.425	0.984638	0.965513
														49.475	0.984861	0.965737
														49.525	0.984704	0.965964
														49.575	0.984894	0.966196
														49.625	0.985217	0.966315
														49.675	0.98493	0.966525
														49.725	0.985112	0.966655
														49.775	0.985365	0.966842
														49.825	0.985517	0.967142
														49.875	0.985645	0.967382
														49.925	0.985565	0.967672
														49.975	0.985716	0.967489
														50.025	0.985926	0.967834
														50.075	0.985751	0.968068
														50.125	0.986201	0.968335
														50.175	0.98624	0.968513
														50.225	0.986287	0.968647
														50.275	0.986168	0.969147
														50.325	0.98671	0.969047
														50.375	0.987008	0.969477
														50.425	0.98676	0.969467
														50.475	0.986781	0.969504
														50.525	0.986919	0.969881
														50.575	0.987091	0.970267
														50.625	0.987252	0.970387
														50.675	0.987179	0.970629
														50.725	0.98723	0.97089
														50.775	0.987665	0.971098
														50.825	0.987449	0.971083
														50.875	0.987809	0.971461
														50.925	0.987757	0.971385
														50.975	0.987845	0.97161
														51.025	0.98804	0.971877
														51.075	0.988073	0.97212
														51.125	0.988138	0.972527
														51.175	0.988314	0.97252
														51.225	0.988229	0.972823
														51.275	0.988363	0.972982
														51.325	0.988578	0.973101
														51.375	0.988589	0.973207
														51.425	0.988604	0.973359
														51.475	0.98884	0.973679
														51.525	0.988883	0.973862
														51.575	0.989085	0.973792
														51.625	0.989096	0.97411
														51.675	0.98908	0.974292
														51.725	0.989329	0.974646
														51.775	0.989336	0.974744
														51.825	0.989449	0.974905
														51.875	0.989399	0.97518
														51.925	0.989604	0.975384
														51.975	0.989827	0.975649
														52.025	0.989865	0.975662
														52.075	0.989972	0.975937
														52.125	0.990051	0.976143
														52.175	0.990077	0.976239
														52.225	0.99027	0.976395
														52.275	0.990187	0.976546
														52.325	0.990382	0.976627
														52.375	0.990503	0.976958
														52.425	0.990638	0.976989
														52.475	0.990638	0.977424
														52.525	0.990851	0.977539
														52.575	0.990832	0.97775
														52.625	0.99083	0.977921
														52.675	0.990887	0.977902
														52.725	0.991192	0.978178
														52.775	0.991128	0.978314
														52.825	0.991189	0.978602
														52.875	0.991357	0.978718
														52.925	0.99127	0.978993
														52.975	0.991678	0.979108
														53.025	0.991576	0.979033
														53.075	0.991806	0.979567
														53.125	0.991688	0.97956
														53.175	0.991791	0.979639
														53.225	0.992142	0.98
														53.275	0.992053	0.980148
														53.325	0.992218	0.980153
														53.375	0.992017	0.980603
														53.425	0.992345	0.980635
														53.475	0.992407	0.980867
														53.525	0.992416	0.980942
														53.575	0.992615	0.981137
														53.625	0.992477	0.981308
														53.675	0.992503	0.981258
														53.725	0.99297	0.981516
														53.775	0.992823	0.981782
														53.825	0.99278	0.981889
														53.875	0.992863	0.982219
														53.925	0.993026	0.982251
														53.975	0.993326	0.982484
														54.025	0.993167	0.982483
														54.075	0.993387	0.982755
														54.125	0.993339	0.982915
														54.175	0.99338	0.983096
														54.225	0.993808	0.983339
														54.275	0.993714	0.983329
														54.325	0.993602	0.983498
														54.375	0.99374	0.983642
														54.425	0.993738	0.983759
														54.475	0.994093	0.984111
														54.525	0.993977	0.984035
														54.575	0.993986	0.984268
														54.625	0.994099	0.984591
														54.675	0.99423	0.984692
														54.725	0.994289	0.985102
														54.775	0.994307	0.985076
														54.825	0.994488	0.985063
														54.875	0.994774	0.985399
														54.925	0.994608	0.985435
														54.975	0.994617	0.985515
														55.025	0.994746	0.985594
														55.075	0.994674	0.985694
														55.125	0.994738	0.985983
														55.175	0.994926	0.986173
														55.225	0.994978	0.986563
														55.275	0.995054	0.986425
														55.325	0.994954	0.986748
														55.375	0.995287	0.986887
														55.425	0.995404	0.987144
														55.475	0.995415	0.987221
														55.525	0.995469	0.987353
														55.575	0.995436	0.987473
														55.625	0.995558	0.987525
														55.675	0.995585	0.987673
														55.725	0.995749	0.987908
														55.775	0.995746	0.988283
														55.825	0.995936	0.988153
														55.875	0.995937	0.988237
														55.925	0.996051	0.988438
														55.975	0.996019	0.988772
														56.025	0.996035	0.988656
														56.075	0.996021	0.989103
														56.125	0.996225	0.989114
														56.175	0.996393	0.989293
														56.225	0.996634	0.989586
														56.275	0.996428	0.989595
														56.325	0.99656	0.98973
														56.375	0.996852	0.989903
														56.425	0.996486	0.989856
														56.475	0.996672	0.990259
														56.525	0.996829	0.990311
														56.575	0.996703	0.990519
														56.625	0.996933	0.990489
														56.675	0.997068	0.990641
														56.725	0.997241	0.990952
														56.775	0.997191	0.990825
														56.825	0.997056	0.991075
														56.875	0.997213	0.991253
														56.925	0.997113	0.991403
														56.975	0.997341	0.991503
														57.025	0.997364	0.991648
														57.075	0.997346	0.991892
														57.125	0.997601	0.991901
														57.175	0.997714	0.991869
														57.225	0.997781	0.992486
														57.275	0.997724	0.992483
														57.325	0.997774	0.992517
														57.375	0.997898	0.992443
														57.425	0.99786	0.992821
														57.475	0.998103	0.992779
														57.525	0.99797	0.99291
														57.575	0.99816	0.993229
														57.625	0.998307	0.993274
														57.675	0.998049	0.993318
														57.725	0.998188	0.993603
														57.775	0.998186	0.993558
														57.825	0.998304	0.993867
														57.875	0.998386	0.993818
														57.925	0.998444	0.994109
														57.975	0.998451	0.994203
														58.025	0.998371	0.99429
														58.075	0.998517	0.994472
														58.125	0.998845	0.994369
														58.175	0.998585	0.994544
														58.225	0.998712	0.994893
														58.275	0.99885	0.99478
														58.325	0.998905	0.994827
														58.375	0.999092	0.995053
														58.425	0.999022	0.995404
														58.475	0.998974	0.995495
														58.525	0.999136	0.995571
														58.575	0.999062	0.995676
														58.625	0.999254	0.995688
														58.675	0.999308	0.995973
														58.725	0.999412	0.996004
														58.775	0.999224	0.996061
														58.825	0.999347	0.996361
														58.875	0.999299	0.996428
														58.925	0.999307	0.996461
														58.975	0.999635	0.996773
														59.025	0.999603	0.996777
														59.075	0.999693	0.996971
														59.125	0.999656	0.996989
														59.175	0.999778	0.996946
														59.225	0.99981	0.99735
														59.275	0.999765	0.997385
														59.325	0.999878	0.997356
														59.375	1.00003	0.997468
														59.425	1.00006	0.997565
														59.475	0.999996	0.997741
														59.525	1.0003	0.997922
														59.575	1.00015	0.997889
														59.625	1.00032	0.998191
														59.675	1.00032	0.998318
														59.725	1.00053	0.998513
														59.775	1.00051	0.998457
														59.825	1.00023	0.998589
														59.875	1.0004	0.998562
														59.925	1.00059	0.998792
														59.975	1.0007	0.999128
														60.025	1.0006	0.999038
